# Supplementary material for: Stereoselective cyclopropanation of enamides via C–C bond cleavage of cyclopropenes
Source: Royal Society of Chemistry journal article supplement (doi:10.1039/d2qo00091a), 2022-01-01

## Supporting Information

# Stereoselective Cyclopropanation of Enamides *via* C—C Bond Cleavage of Cyclopropenes

Jie Chen,<sup>a,b</sup> Jiabin Han,<sup>b</sup> Tao Wu,<sup>b</sup> Jian Zhang,<sup>a</sup> Meng Li,<sup>b</sup> Ying Xu,<sup>a</sup> Jinli Zhang,<sup>b</sup> Yongjuan Jiao,<sup>b</sup> Yanhui Yang,<sup>b</sup> Yaojia Jiang<sup>\*a,b</sup>

<sup>a</sup> Laboratory Breeding Base of Green Pesticide and Agricultural Bioengineering, Key Laboratory of Green Pesticide and Agricultural Bioengineering Ministry of Education, Guizhou University, Huaxi District, Guiyang 550025, China.

<sup>b</sup> Institute of Advanced Synthesis, School of Chemistry and Molecular Engineering, Nanjing Tech University, Nanjing 211816, China.

## Table of Contents

|                                                                             |     |
|-----------------------------------------------------------------------------|-----|
| General methods -----                                                       | 2   |
| Optimization of ring-opening reaction conditions-----                       | 3   |
| General procedure for cyclopropenes and their spectral data -----           | 4   |
| General procedure for enamides and their spectral data -----                | 7   |
| General procedure for vinyl cyclopropylamides and their spectral data ----- | 17  |
| General procedure for 1,3-dienyl aldehydes and their spectral data-----     | 48  |
| NOESY NMR spectra of products-----                                          | 58  |
| NMR spectra for enamides-----                                               | 65  |
| NMR spectra for vinyl cyclopropylamides-----                                | 85  |
| NMR spectra for 1,3-dienyl aldehydes-----                                   | 128 |

## General methods:

All reactions were carried out in flame or oven-dried glassware under nitrogen atmosphere with freshly distilled dry solvents under anhydrous conditions unless otherwise indicated. Flash column chromatography was performed with silica gel 60 (230 – 400 mesh). Chromatograms were visualized by fluorescence quenching with UV light at 254 nm or by staining with base solution of potassium permanganate and molybdate. NMR spectra were recorded at RT on 300 or 400 MHz Bruker spectrometers. The residual solvent signals were taken as the reference (0.00 ppm for  $^1\text{H}$  NMR spectra and 77.0 ppm for  $^{13}\text{C}$  NMR spectra in  $\text{CDCl}_3$ ). Chemical shift ( $\delta$ ) is reported in ppm, coupling constants ( $J$ ) are given in Hz. The following abbreviations classify the multiplicity: s = singlet, d = doublet, t = triplet, m = multiplet, dd = doublet of doublet, q = quartet and br = broad signal. HRMS (ESI) spectra were recorded on a Waters Q-Tof premier TM mass spectrometer.

**Table-S1 Optimization of Ring-Opening Reaction Conditions:**

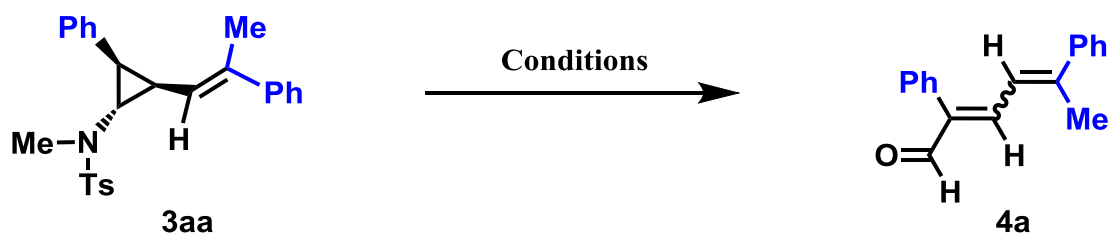

| Entry | Catalyst | Additive (equiv.)          | Solvent                   | Temp. | Yield <sup>a,b</sup> | <i>E/Z</i> <sup>c</sup> |
|-------|----------|----------------------------|---------------------------|-------|----------------------|-------------------------|
| 1     | -        | -                          | DCM (0.1 M)               | 80 °C | -                    | -                       |
| 2     | -        | TsOH (1.0)                 | DCM (0.1 M)               | 80 °C | -                    | -                       |
| 3     | AgTFA    | 1,4-Naphthoquinone (1.0)   | DCM (0.1 M)               | 80 °C | 21                   | 2.4:1                   |
| 4     | AgTFA    | PhB(OH) <sub>2</sub> (1.0) | DCM (0.1 M)               | 80 °C | 22                   | 2.1:1                   |
| 5     | AgTFA    | DDQ (1.0)                  | DCM (0.1 M)               | 80 °C | 31                   | 2.3:1                   |
| 6     | AgTFA    | Cu(OAc) <sub>2</sub> (1.0) | DCM (0.1 M)               | 80 °C | -                    | -                       |
| 7     | AgTFA    | Cu(TFA) <sub>2</sub> (1.0) | DCM (0.1 M)               | 80 °C | 25                   | 1.9:1                   |
| 8     | AgTFA    | CuCl <sub>2</sub> (1.0)    | DCM (0.1 M)               | 80 °C | 51                   | 1.5:1                   |
| 9     | AgTFA    | CuO (1.0)                  | DCM (0.1 M)               | 80 °C | 45                   | 1.3:1                   |
| 10    | AgTFA    | CuCl <sub>2</sub> (2.0)    | DCM (0.1 M)               | 80 °C | 68                   | 3.5:1                   |
| 11    | AgTFA    | CuCl <sub>2</sub> (3.0)    | DCM (0.1 M)               | 80 °C | 59                   | 3.2:1                   |
| 12    | AgTFA    | CuCl <sub>2</sub> (2.0)    | DCM (0.1 M)               | 60 °C | 43                   | 3.3:1                   |
| 13    | AgTFA    | CuCl <sub>2</sub> (2.0)    | DCM (0.1 M)               | 70 °C | 55                   | 2.9:1                   |
| 14    | AgTFA    | CuCl <sub>2</sub> (2.0)    | DCM (0.1 M)               | 90 °C | 72                   | 3.6:1                   |
| 15    | AgTFA    | CuCl <sub>2</sub> (2.0)    | DCE (0.1 M)               | 90 °C | 61                   | 3.1:1                   |
| 16    | AgTFA    | CuCl <sub>2</sub> (2.0)    | Tol. (0.1 M)              | 90 °C | 77                   | 3.9:1                   |
| 17    | AgTFA    | CuCl <sub>2</sub> (2.0)    | PhCF <sub>3</sub> (0.1 M) | 90 °C | 55                   | 2.8:1                   |
| 18    | AgTFA    | CuCl <sub>2</sub> (2.0)    | Xylene (0.1 M)            | 90 °C | 81                   | 3.9:1                   |
| 19    | AgTFA    | CuCl <sub>2</sub> (2.0)    | Xylene (0.05 M)           | 90 °C | 85                   | 4.2:1                   |

<sup>a</sup>Conditions: **3** (0.20 mmol, 1.0 equiv.), additive and AgTFA (5 mol %) were stirred in solvent. <sup>b</sup>Isolated yields. <sup>c</sup>The ratio was determined by <sup>1</sup>H NMR.

**General procedure for the synthesis of cyclopropenes<sup>1</sup>:**

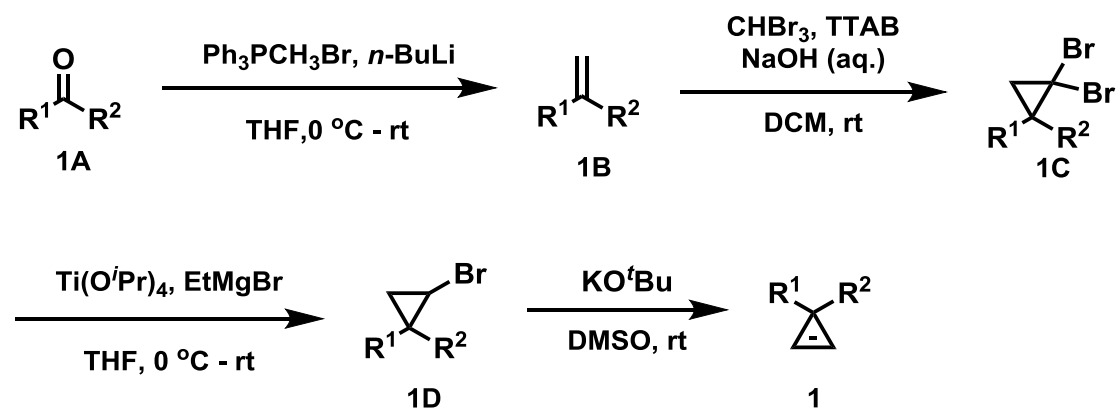

To a stirred solution of Ph<sub>3</sub>PCH<sub>3</sub>Br (35.7 g, 100 mmol, 2.0 equiv.) in THF (150 mL) at 0 °C was added 1.6 M *n*-butyllithium (62.5 ml, 100 mmol, 2.0 equiv.) dropwise over 60 minutes. The reaction mixture was stirred for 2.0 hours at room temperature. Ketone **1A** (50 mmol, 1.0 equiv.) in THF (15 mL) was added dropwise to the cooled reaction mixture at 0 °C via cannular. The reaction was then stirred at room temperature for 24-48 hours, quenched with saturated NH<sub>4</sub>Cl (40 mL), diluted with water (30 mL) and extracted with EtOAc (3 x 30 mL). The combined organic extracts were washed with brine (2 x 30 mL), dried over MgSO<sub>4</sub> and concentrated under reduced pressure. The crude product was dissolved in hexane and triphenylphosphine oxide was filtered off. The filtrate solution was then concentrated under reduced pressure. The product **1B** was isolated by flash column chromatography (eluent: PE).

---

<sup>1</sup>A. Parra, L. Amenós, M. Guisán-Ceinos, A. López, J. L. G. Ruano and M. Tortosa, Copper-Catalyzed Diastereo- and Enantioselective Desymmetrization of Cyclopropenes: Synthesis of Cyclopropylboronates. *J. Am. Chem. Soc.*, 2014, **136**, 15833-15836.

A solution of 10 M aqueous sodium hydroxide (80 g, 200 mmol, 4.0 equiv.) was added to alkyltrimethylammonium bromide (1.7 g, 5.0 mmol, 0.1 equiv.). To the stirring reaction mixture was added a solution of alkene **1B** (50 mmol, 1.0 equiv.) in DCM (2 mL). Bromoform (100 mmol) in DCM (10 mL) was added dropwise over 1 hour. The reaction was allowed to stir vigorously at 25 °C for 24 hours, after which the mixture was extracted with DCM (3 x 100 mL). The combined organic layers were washed with brine (2 x 100 mL), dried over MgSO<sub>4</sub> and concentrated under reduced pressure. The product **1C** was purified by flash column chromatography (eluent: PE).

A solution of ethylmagnesium bromide (75 mmol, 1.5 equiv.) was added dropwise over an hour to a stirring solution of 2, 2-dibromocyclopropane **1C** (50 mmol, 1.0 equiv.), Ti(O<sup>*i*</sup>Pr)<sub>4</sub> (1.4 g, 5.0 mmol, 0.1 equiv.) and Et<sub>2</sub>O (50 mL) and the resulting mixture was stirred for 3 hours at 25 °C. The reaction was quenched by slow addition of water (20 mL) and 1 M HCl (30 mL), stirred for a further few minutes followed by the addition of Et<sub>2</sub>O (30 mL). The aqueous layer was washed with Et<sub>2</sub>O (3 x 20 mL), combined organic layers washed with saturated sodium bicarbonate (10 mL), brine (10 mL), dried over MgSO<sub>4</sub> and concentrated under reduced pressure. The crude oil was purified by flash column chromatography to afford **1D** (eluent: PE).

Potassium *tert*-butoxide (0.84 g, 7.5 mmol, 1.5 equiv.) and dimethyl sulfoxide (10 mL) were heated to 55 °C and allowed to stir for 30 minutes at this temperature until the mixture was homogenous. The solution was then cooled to 25 °C. 2-Bromocyclopropane **1D** (5.0 mmol, 1.0 equiv.) in DMSO (5.0 mL) was added to the reaction mixture over 3 hours and allowed to stir at 25 °C for 20 hours. The reaction

was quenched with brine (50 mL) and PE (50 mL) and layers partitioned. The aqueous layer was washed with PE (3 x 50 mL) and combined organic layers washed with brine (2 x 50 mL), dried over MgSO<sub>4</sub> and concentrated under reduced pressure. The product was purified by flash column chromatography (eluent: PE) to afford cyclopropenes **1a-1t**.

**The spectroscopic properties of these compounds were consistent with literature data: 1a – 1h, 1j;<sup>2</sup> 1i, 1k, 1m - 1t;<sup>3</sup> 1l.<sup>4</sup>**

---

<sup>2</sup> P. Guo, W. Sun, Y. Liu, Y.-X. Li, T.-P. Loh and Y. Jiang, Stereoselective Synthesis of Vinylcyclopropa[*b*]indolines via a Rh-Migration Strategy. *Org. Lett.*, 2020, **22**, 5978–5983.

<sup>3</sup> J. Chen, P. Guo, J. Zhang, J. Rong, W. Sun, Y. Jiang and T.-P. Loh, Synthesis of Functionalized  $\alpha$ -Vinyl Aldehydes from Enaminones. *Angew. Chem., Int. Ed.*, 2019, **58**, 12674–12679.

<sup>4</sup> C. Jiang, J. Wu, J. Han, K. Chen, Y. Qian, Z. Zhang and Y. Jiang, An expedient synthesis of highly functionalized 1,3-dienes by employing cyclopropenes as C4 units. *Chem. Commun.*, 2021, **57**, 5710–5713.

<sup>5</sup> A. S. Reddy and K. C. K. Swamy, Ethanol as a Hydrogenating Agent: Palladium-Catalyzed Stereoselective Hydrogenation of Ynamides To Give Enamides. *Angew. Chem., Int. Ed.*, 2017, **56**, 6984–6988.

### General procedure for the synthesis of enamides<sup>5</sup>

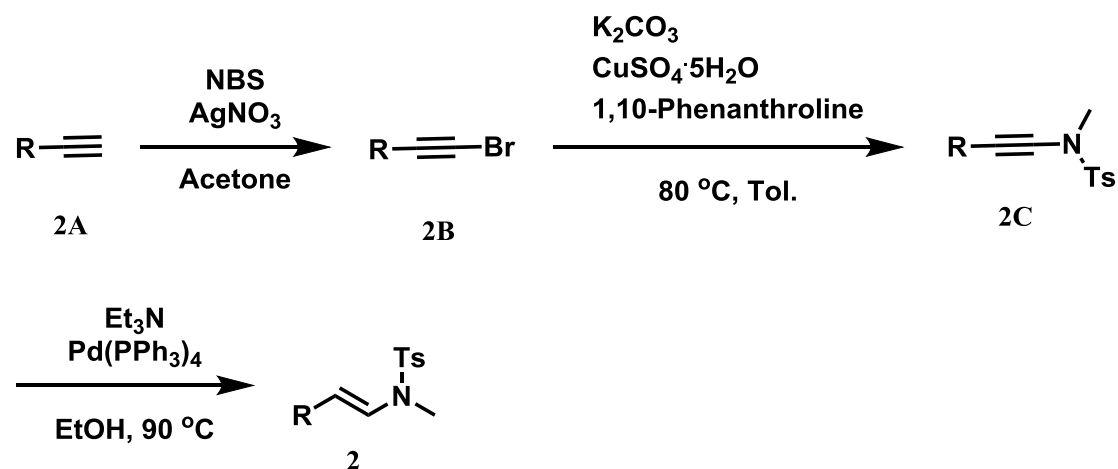

To a solution of the alkyne **2A** (5.0 mmol, 1.0 equiv.) in anhydrous acetone (conc. = 0.30 M) were added *N*-bromosuccinimide (1.07 g, 6.0 mmol, 1.2 equiv.) and AgNO<sub>3</sub> (0.085g, 0.5 mmol, 10 mol %). The mixture was stirred at room temperature for 1.0 h. The resulting mixture was then filtrated, and the filtrate was extracted with CH<sub>2</sub>Cl<sub>2</sub> (3 x 30 mL). The combined organic layers were washed with 1 M HCl (2 x 40 mL), brine (30 mL), dried (Na<sub>2</sub>SO<sub>4</sub>) and concentrated under vacuum (25 °C, 15 mbar) to afford the title compounds **2B**.

Copper(II) sulfate pentahydrate (100 mg, 0.40 mmol, 10 mol %), 1,10-phenanthroline (144 mg, 0.8 mmol, 20 mmol %), potassium carbonate (898 mg, 8.0 mmol, 2.0 equiv.), and *N*-methyl-4-methylbenzenesulfonamide (963 mg, 5.2 mmol, 1.3 equiv.) were placed in a 50 mL reaction flask. The flask was filled with argon by using a standard Schlenk technique. To the flask, a toluene solution (conc = 0.20 M) of bromoethyne (4 mmol, 1.0 equiv) was added. The resulting mixture was stirred for 12 h at 80 °C. The

reaction was quenched with water (20 mL), and the product was extracted with ethyl acetate (3 x 10 mL). The combined organic layer was dried over sodium sulfate and concentrated in vacuo. The product **2C** was isolated by flash column chromatography (eluent: hexane/ ethyl acetate = 5:1).

To an oven dried Schlenk tube was added *N*-ethynyl-*N*-4-dimethylbenzenesulfonamide **2C** (3.0 mmol, 1.0 equiv.), Pd(PPh<sub>3</sub>)<sub>4</sub> (173 mg, 0.15 mmol, 5 mol %), ethanol (conc. = 0.20 M) and Et<sub>3</sub>N (911 mg, 9.0 mmol, 3.0 equiv.). The tube was sealed under nitrogen atmosphere and heated at 90 °C (oil bath temperature) overnight. After completion of the reaction as monitored by TLC, the crude mixture was cooled to room temperature. The mixture was then passed through celite, washed with ethyl acetate (20 mL) and concentrated in vacuum. The residue was then purified by using silica gel column chromatography using PE/EtOAc (9:1) as the eluent to afford (*E*)-*N*-4-dimethyl-*N*-styrylbenzenesulfonamide **2a**. Compounds **2a-o** were prepared following the same procedure and the same molar quantities.

**(*E*)-*N*-4-Dimethyl-*N*-styrylbenzenesulfonamide (2a):**

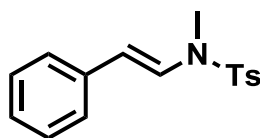

The title compound was prepared according to the general procedure. The product was obtained as white solid in 61% yield (0.878 g, 3.05 mmol); Mp. 92 – 93 °C; <sup>1</sup>H NMR (400 MHz, CDCl<sub>3</sub>) δ 7.66 (d, *J* = 8.0 Hz, 1H), 7.52 (d, *J* = 16.0 Hz, 1H), 7.31 – 7.29 (m, 6H), 7.26 (s, 1H), 7.21 – 7.16 (m, 1H), 5.67 (d, *J* = 16.0 Hz, 1H), 3.00 (s, 3H), 2.41



(s, 3H);  $^{13}\text{C}$  NMR (100 MHz,  $\text{CDCl}_3$ )  $\delta$  143.9, 136.2, 134.4, 129.8, 128.6, 128.1, 126.9, 126.4, 125.4, 110.8, 32.1, 21.4; HRMS (ESI)  $m/z$   $[\text{M}+\text{H}]^+$ : Calcd for  $\text{C}_{16}\text{H}_{18}\text{NO}_2\text{S}$ : 288.1058. Found: 288.1067.

**(E)-N-4-Dimethyl-N-(4-methylstyryl)benzenesulfonamide (2b):**

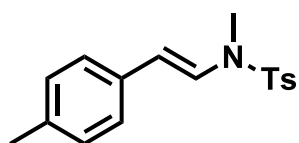

The title compound was prepared according to the general procedure. The product was obtained as white solid in 60% yield (0.906 g, 3.00 mmol); Mp. 112 – 113 °C;  $^1\text{H}$  NMR (400 MHz,  $\text{CDCl}_3$ )  $\delta$  7.64 (d,  $J$  = 8.3 Hz, 2H), 7.45 (d,  $J$  = 14.5 Hz, 1H), 7.29 – 7.25 (m, 2H), 7.18 (d,  $J$  = 8.1 Hz, 2H), 7.09 (d,  $J$  = 8.0 Hz, 2H), 5.64 (d,  $J$  = 14.4 Hz, 1H), 2.97 (s, 3H), 2.39 (s, 3H), 2.31 (s, 3H);  $^{13}\text{C}$  NMR (100 MHz,  $\text{CDCl}_3$ )  $\delta$  143.9, 136.3, 134.5, 133.4, 129.8, 129.4, 127.4, 127.0, 125.4, 111.0, 32.2, 21.5, 21.1; HRMS (ESI)  $m/z$   $[\text{M}+\text{H}]^+$ : Calcd for  $\text{C}_{17}\text{H}_{20}\text{NO}_2\text{S}$ : 302.1215. Found: 302.1224.

**(E)-N-4-Dimethyl-N-(4-propylstyryl)benzenesulfonamide (2c):**

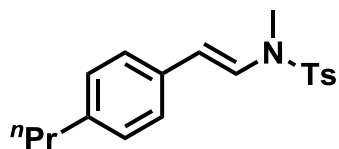

The title compound was prepared according to the general procedure. The product was obtained as yellow solid in 62% yield (1.023 g, 3.10 mmol); Mp. 42 – 43 °C;  $^1\text{H}$  NMR (400 MHz,  $\text{CDCl}_3$ )  $\delta$  7.64 (d,  $J$  = 8.3 Hz, 2H), 7.46 (d,  $J$  = 14.5 Hz, 1H), 7.29 – 7.25 (m, 2H), 7.20 (d,  $J$  = 8.2 Hz, 2H), 7.10 (d,  $J$  = 8.1 Hz, 2H), 5.64 (d,  $J$  = 14.4 Hz, 1H),

2.97 (s, 3H), 2.56 – 2.53 (m, 2H), 2.39 (s, 3H), 1.64 – 1.59 (q,  $J = 7.4$  Hz, 2H), 0.93 (t,  $J = 7.3$  Hz, 3H);  $^{13}\text{C}$  NMR (100 MHz,  $\text{CDCl}_3$ )  $\delta$  143.9, 141.2, 134.5, 133.7, 129.8, 128.8, 127.5, 127.0, 125.4, 111.0, 37.7, 32.2, 24.5, 21.5, 13.8; HRMS (ESI)  $m/z$   $[\text{M}+\text{H}]^+$ : Calcd for  $\text{C}_{19}\text{H}_{24}\text{NO}_2\text{S}$ : 330.1528. Found: 330.1518.

**(*E*)-*N*-(2-([1,1'-Biphenyl]-4-yl)vinyl)-*N*-4-dimethylbenzenesulfonamide (2d):**

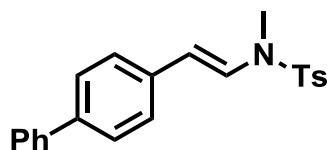

The title compound was prepared according to the general procedure. The product was obtained as white solid in 60% yield (1.092 g, 3.00 mmol); Mp. 158 – 159 °C;  $^1\text{H}$  NMR (400 MHz,  $\text{CDCl}_3$ )  $\delta$  7.67 (d,  $J = 8.2$  Hz, 2H), 7.58 (dd,  $J_1 = 6.4$  Hz,  $J_2 = 2.4$  Hz, 2H), 7.53 (d,  $J = 8.7$  Hz, 2H), 7.43 (t,  $J = 7.7$  Hz, 2H), 7.37 – 7.28 (m, 5H), 5.70 (d,  $J = 14.5$  Hz, 1H), 3.01 (s, 1H), 2.40 (s, 1H);  $^{13}\text{C}$  NMR (100 MHz,  $\text{CDCl}_3$ )  $\delta$  144.0, 140.6, 139.2, 135.4, 134.5, 129.9, 128.8, 128.2, 127.3, 127.2, 127.0, 126.8, 125.8, 110.3, 32.2, 21.5; HRMS (ESI)  $m/z$   $[\text{M}+\text{H}]^+$ : Calcd for  $\text{C}_{22}\text{H}_{22}\text{NO}_2\text{S}$ : 364.1371. Found: 364.1376.

**(*E*)-*N*-(4-Methoxystyryl)-*N*-4-dimethylbenzenesulfonamide (2e):**

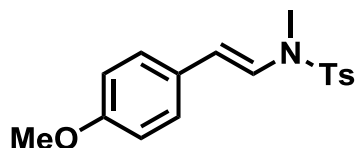

The title compound was prepared according to the general procedure. The product was obtained as yellow oil in 58% yield (0.922 g, 2.90 mmol);  $^1\text{H}$  NMR (400 MHz,  $\text{CDCl}_3$ )  $\delta$  7.64 (d,  $J = 8.3$  Hz, 2H), 7.36 (d,  $J = 14.5$  Hz, 1H), 7.28 (d,  $J = 8.1$  Hz, 2H), 7.22 –

7.20 (m, 2H), 6.83 (d,  $J = 8.7$  Hz, 2H), 5.62 (d,  $J = 14.5$  Hz, 1H), 3.79 (s, 3H), 2.96 (s, 3H), 2.39 (s, 3H);  $^{13}\text{C}$  NMR (100 MHz,  $\text{CDCl}_3$ )  $\delta$  158.4, 143.8, 134.4, 129.8, 128.8, 127.9, 126.9, 126.5, 114.1, 110.8, 55.2, 32.2, 21.4; HRMS (ESI)  $m/z$   $[\text{M}+\text{H}]^+$ : Calcd for  $\text{C}_{17}\text{H}_{20}\text{NO}_3\text{S}$ : 318.1164. Found: 318.1157.

**(*E*)-*N*-4-Dimethyl-*N*-(4-(trifluoromethyl)styryl)benzenesulfonamide (2f):**

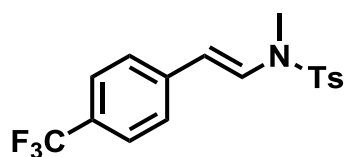

The title compound was prepared according to the general procedure. The product was obtained as white solid in 56% yield (0.997 g, 2.80 mmol); Mp. 114 – 115°C;  $^1\text{H}$  NMR (400 MHz,  $\text{CDCl}_3$ )  $\delta$  7.65 (d,  $J = 12.0$  Hz, 2H), 7.60 (d,  $J = 14.5$  Hz, 1H), 7.52 (d,  $J = 8.2$  Hz, 2H), 7.36 (d,  $J = 8.2$  Hz, 2H), 7.30 (d,  $J = 8.0$  Hz, 2H), 5.65 (d,  $J = 14.4$  Hz, 1H), 3.01 (s, 3H), 2.41 (s, 3H);  $^{19}\text{F}$  NMR (376 MHz,  $\text{CDCl}_3$ )  $\delta$  -62.3;  $^{13}\text{C}$  NMR (100 MHz,  $\text{CDCl}_3$ )  $\delta$  144.3, 140.1, 134.5, 130.2, 130.0, 127.0, 125.6 (q,  $J = 3.8$  Hz), 125.4, 108.9, 32.1, 21.6; HRMS (ESI)  $m/z$   $[\text{M}+\text{H}]^+$ : Calcd for  $\text{C}_{17}\text{H}_{17}\text{F}_3\text{NO}_2\text{S}$ : 356.0932. Found: 356.0929.

**(*E*)-*N*-4-Dimethyl-*N*-(4-nitrostyryl)benzenesulfonamide (2g):**

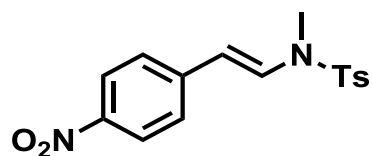

The title compound was prepared according to the general procedure. The product was obtained as yellow solid in 61% yield (1.016 g, 3.05 mmol); Mp. 137 – 138 °C;  $^1\text{H}$

NMR (400 MHz, CDCl<sub>3</sub>)  $\delta$  8.13 (d,  $J$  = 8.8 Hz, 2H), 7.71 (d,  $J$  = 14.4 Hz, 1H), 7.67 (d,  $J$  = 8.4 Hz, 2H), 7.38 (d,  $J$  = 8.9 Hz, 2H), 7.33 – 7.31 (m, 2H), 5.67 (d,  $J$  = 14.4 Hz, 1H), 3.03 (s, 3H), 2.41 (s, 3H); <sup>13</sup>C NMR (100 MHz, CDCl<sub>3</sub>)  $\delta$  145.8, 144.5, 143.5, 134.5, 131.9, 130.1, 127.0, 125.5, 124.3, 107.9, 32.1, 21.6; HRMS (ESI)  $m/z$  [M+H]<sup>+</sup>: Calcd for C<sub>16</sub>H<sub>17</sub>N<sub>2</sub>O<sub>4</sub>S: 333.0909. Found: 333.0902.

**(E)-N-(4-Fluorostyryl)-N-4-dimethylbenzenesulfonamide (2h):**

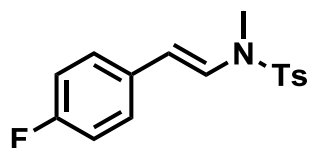

The title compound was prepared according to the general procedure. The product was obtained as black oil in 60% yield (0.918 g, 3.00 mmol); <sup>1</sup>H NMR (400 MHz, CDCl<sub>3</sub>)  $\delta$  7.66 (d,  $J$  = 8.2 Hz, 2H), 7.52 (d,  $J$  = 14.4 Hz, 1H), 7.29 (d,  $J$  = 8.0 Hz, 2H), 7.23 – 7.20 (m, 1H), 7.04 (d,  $J$  = 1.4 Hz, 1H), 6.98 – 6.95 (m, 1H), 6.84 (td,  $J$  = 8.4, 2.5 Hz, 1H), 5.62 (d,  $J$  = 14.4 Hz, 1H), 2.98 (s, 3H), 2.40 (s, 3H); <sup>19</sup>F NMR (376 MHz, CDCl<sub>3</sub>)  $\delta$  -113.20; <sup>13</sup>C NMR (100 MHz, CDCl<sub>3</sub>)  $\delta$  163.0 (d,  $J$  = 245.0 Hz), 144.1, 138.7 (d,  $J$  = 8.1 Hz), 134.3, 130.0 (d,  $J$  = 8.7 Hz), 129.9, 129.1, 126.9, 121.1 (d,  $J$  = 2.9 Hz), 113.0 (d,  $J$  = 21.3 Hz), 111.8 (d,  $J$  = 22.3 Hz), 109.4 (d,  $J$  = 3.0 Hz), 32.0, 21.4; HRMS (ESI)  $m/z$  [M+H]<sup>+</sup>: Calcd for C<sub>16</sub>H<sub>17</sub>FNO<sub>2</sub>S: 306.0964. Found: 306.0960.

**(E)-N-(3-Fluorostyryl)-N-4-dimethylbenzenesulfonamide (2i):**

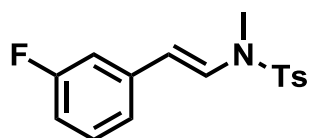

The title compound was prepared according to the general procedure. The product was obtained as yellow solid in 61% yield (0.933 g, 3.05 mmol); Mp. 55 – 56 °C;  $^1\text{H}$  NMR (400 MHz,  $\text{CDCl}_3$ )  $\delta$  7.64 (d,  $J = 8.4$  Hz, 2H), 7.48 (d,  $J = 14.4$  Hz, 1H), 7.29 (d,  $J = 8.3$  Hz, 2H), 7.23 – 7.18 (m, 4H), 5.60 (d,  $J = 14.4$  Hz, 1H), 2.98 (s, 3H), 2.40 (s, 3H);  $^{19}\text{F}$  NMR (376 MHz,  $\text{CDCl}_3$ )  $\delta$  -113.2;  $^{13}\text{C}$  NMR (100 MHz,  $\text{CDCl}_3$ )  $\delta$  144.1, 134.9, 134.5, 131.9, 129.9, 128.8, 128.6, 127.0, 126.6, 109.4, 32.1, 21.5; HRMS (ESI)  $m/z$   $[\text{M}+\text{H}]^+$ : Calcd for  $\text{C}_{16}\text{H}_{17}\text{FNO}_2\text{S}$ : 306.0964. Found: 306.0958.

**(*E*)-*N*-(4-Chlorostyryl)-*N*-4-dimethylbenzenesulfonamide (2j):**

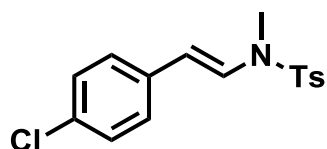

The title compound was prepared according to the general procedure. The product was obtained as yellow solid in 62% yield (0.998 g, 3.10 mmol); Mp. 113 – 114 °C;  $^1\text{H}$  NMR (400 MHz,  $\text{CDCl}_3$ )  $\delta$  7.66 (d,  $J = 8.2$  Hz, 2H), 7.52 (d,  $J = 14.4$  Hz, 1H), 7.30 (d,  $J = 8.0$  Hz, 2H), 7.27 – 7.18 (m, 1H), 7.04 (d,  $J = 8.0$  Hz, 1H), 6.97 (d,  $J = 8.0$  Hz, 1H), 6.84 (td,  $J_1 = 2.5$  Hz,  $J_2 = 8.3$  Hz, 1H), 5.62 (d,  $J = 14.4$  Hz, 1H), 2.99 (s, 3H), 2.40 (s, 3H).  $^{13}\text{C}$  NMR (100 MHz,  $\text{CDCl}_3$ )  $\delta$  144.1, 134.8, 134.5, 131.9, 129.9, 128.8, 128.6, 127.0, 126.6, 109.4, 32.1, 21.5; HRMS (ESI)  $m/z$   $[\text{M}+\text{H}]^+$ : Calcd for  $\text{C}_{16}\text{H}_{17}\text{ClNO}_2\text{S}$ : 322.0669. Found: 322.0674.

**(*E*)-*N*-(4-Bromostyryl)-*N*-4-dimethylbenzenesulfonamide (2k):**

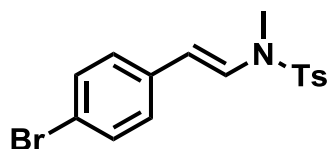

The title compound was prepared according to the general procedure. The product was obtained as white solid in 63% yield (1.163 g, 3.15 mmol); Mp. 77 – 78 °C;  $^1\text{H}$  NMR (400 MHz,  $\text{CDCl}_3$ )  $\delta$  7.64 (d,  $J = 8.3$  Hz, 2H), 7.49 (d,  $J = 14.4$  Hz, 1H), 7.38 (d,  $J = 8.4$  Hz, 2H), 7.29 (d,  $J = 8.1$  Hz, 2H), 7.13 (d,  $J = 8.4$  Hz, 2H), 5.58 (d,  $J = 14.4$  Hz, 1H), 2.97 (s, 3H), 2.39 (s, 3H).  $^{13}\text{C}$  NMR (100 MHz,  $\text{CDCl}_3$ )  $\delta$  144.1, 135.3, 134.3, 131.6, 129.9, 128.6, 126.9, 119.8, 109.4, 32.1, 21.5; HRMS (ESI)  $m/z$   $[\text{M}+\text{H}]^+$ : Calcd for  $\text{C}_{16}\text{H}_{17}\text{BrNO}_2\text{S}$ : 366.0163. Found: 366.0156.

**(E)-N-4-Dimethyl-N-(pentadec-1-en-1-yl)benzenesulfonamide (2l):**

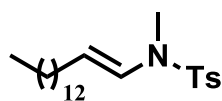

The title compound was prepared according to the general procedure. The product was obtained as white solid in 51% yield (1.005 g, 2.55 mmol); Mp. 41 – 42 °C;  $^1\text{H}$  NMR (400 MHz,  $\text{CDCl}_3$ )  $\delta$  7.60 (d,  $J = 8.3$  Hz, 2H), 7.27 (d,  $J = 8.1$  Hz, 2H), 6.67 (d,  $J = 14.0$ , 1H), 4.67 (dt,  $J_1 = 14.0$  Hz,  $J_2 = 7.2$  Hz, 1H), 2.79 (s, 3H), 2.40 (s, 3H), 1.99 (q,  $J = 7.4$  Hz, 2H), 1.31 – 1.22 (m, 22H), 0.86 (t,  $J = 6.3$  Hz, 3H).  $^{13}\text{C}$  NMR (100 MHz,  $\text{CDCl}_3$ )  $\delta$  143.5, 134.3, 129.6, 127.5, 127.0, 112.1, 32.2, 31.9, 30.1, 30.0, 29.7, 29.6, 29.6, 29.4, 29.3, 28.9, 22.7, 21.5, 14.1; HRMS (ESI)  $m/z$   $[\text{M}+\text{H}]^+$ : Calcd for  $\text{C}_{23}\text{H}_{40}\text{NO}_2\text{S}$ : 394.2780. Found: 394.2788.

**(E)-N-(2-Cyclopropylvinyl)-N-4-dimethylbenzenesulfonamide (2m):**

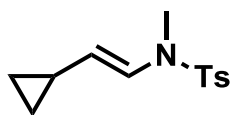

The title compound was prepared according to the general procedure. The product was obtained as yellow oil in 41% yield (0.517 g, 2.05 mmol);  $^1\text{H}$  NMR (400 MHz,  $\text{CDCl}_3$ )  $\delta$  7.62 (d,  $J = 8.3$  Hz, 2H), 7.30 – 7.28 (m, 2H), 6.76 (dd,  $J_1 = 14.0$  Hz,  $J_2 = 0.7$  Hz, 1H), 4.36 (dd,  $J_1 = 14.0$  Hz,  $J_2 = 8.0$  Hz, 1H), 2.77 (s, 3H), 2.41 (s, 3H), 1.38 – 1.30 (m, 1H), 0.69 – 0.64 (m, 2H), 0.28 – 0.24 (m, 2H);  $^{13}\text{C}$  NMR (100 MHz,  $\text{CDCl}_3$ )  $\delta$  143.5, 134.3, 129.6, 127.0, 126.2, 115.4, 32.2, 21.4, 11.5, 6.5; HRMS (ESI)  $m/z$   $[\text{M}+\text{H}]^+$ : Calcd for  $\text{C}_{13}\text{H}_{18}\text{NO}_2\text{S}$ : 252.1058. Found: 252.1052.

**(E)-N-(2-Cyclohexylvinyl)-N-4-dimethylbenzenesulfonamide (2n):**

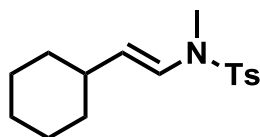

The title compound was prepared according to the general procedure. The product was obtained as yellow oil in 45% yield (0.661 g, 2.25 mmol);  $^1\text{H}$  NMR (400 MHz,  $\text{CDCl}_3$ )  $\delta$  7.55 (d,  $J = 8.3$  Hz, 2H), 7.23 (d,  $J = 7.7$  Hz, 2H), 6.63 (dd,  $J_1 = 14.2$  Hz,  $J_2 = 1.1$  Hz, 1H), 4.61 (dd,  $J_1 = 14.2$  Hz,  $J_2 = 7.3$  Hz, 1H), 2.72 (s, 3H), 2.33 (s, 3H), 1.94 – 1.85 (m, 1H), 1.66 – 1.54 (m, 5H), 1.25 – 1.14 (m, 2H), 1.11 – 0.92 (m, 3H);  $^{13}\text{C}$  NMR (100 MHz,  $\text{CDCl}_3$ )  $\delta$  143.3, 134.1, 129.4, 126.7, 125.9, 117.9, 38.5, 33.6, 32.9, 25.8, 25.7, 21.2; HRMS (ESI)  $m/z$   $[\text{M}+\text{H}]^+$ : Calcd for  $\text{C}_{16}\text{H}_{24}\text{NO}_2\text{S}$ : 294.1528. Found: 294.1534.

**N-4-Dimethyl-N-vinylbenzenesulfonamide (2o):**

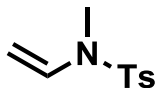

The product was obtained as colorless oil in 70% yield (0.742 g, 3.50 mmol);  $^1\text{H}$  NMR (400 MHz,  $\text{CDCl}_3$ )  $\delta$  7.56 (d,  $J = 6.5$  Hz, 2H), 7.23 (d,  $J = 7.2$  Hz, 2H), 6.95 – 6.88 (m, 1H), 4.25 (dd,  $J_1 = 9.0$  Hz,  $J_2 = 1.6$  Hz, 1H), 4.12 (dd,  $J_1 = 15.6$  Hz,  $J_2 = 1.6$  Hz, 1H), 2.78 (s, 3H), 2.32 (s, 3H);  $^{13}\text{C}$  NMR (100 MHz,  $\text{CDCl}_3$ )  $\delta$  143.6, 134.4, 133.4, 129.5, 126.6, 93.0, 31.0, 21.2; HRMS (ESI)  $m/z$   $[\text{M}+\text{H}]^+$ : Calcd for  $\text{C}_{10}\text{H}_{13}\text{NO}_2\text{S}$ : 212.0745. Found: 212.0750.

***N*-4-Dimethyl-*N*-(prop-1-en-2-yl)benzenesulfonamide (2p):**

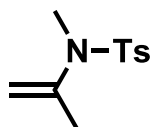

The product was obtained as yellow oil in 71% yield (0.802 g, 3.55 mmol);  $^1\text{H}$  NMR (400 MHz,  $\text{CDCl}_3$ )  $\delta$  7.63 (d,  $J = 8.3$  Hz, 2H), 7.26 (d,  $J = 7.9$  Hz, 2H), 4.75 (d,  $J = 1.3$  Hz, 1H), 4.48 (s, 1H), 2.91 (s, 3H), 2.38 (s, 3H), 1.91 (s, 3H);  $^{13}\text{C}$  NMR (100 MHz,  $\text{CDCl}_3$ )  $\delta$  144.9, 143.4, 134.2, 129.3, 127.5, 109.5, 37.1, 22.1, 21.4; HRMS (ESI)  $m/z$   $[\text{M}+\text{H}]^+$ : Calcd for  $\text{C}_{11}\text{H}_{15}\text{NO}_2\text{S}$ : 226.0902. Found: 226.0906.

**1-Tosyl-1,2,3,4-tetrahydropyridine (2q):**

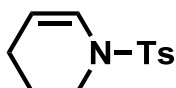

The product was obtained as colorless oil in 70% yield (0.833 g, 3.50 mmol);  $^1\text{H}$  NMR (400 MHz,  $\text{CDCl}_3$ )  $\delta$  7.53 (d,  $J = 8.3$  Hz, 2H), 7.18 (d,  $J = 8.1$  Hz, 2H), 6.50 (dt,  $J_1 =$



8.4 Hz,  $J_2 = 2.0$  Hz,  $J_3 = 2.0$  Hz 1H), 4.85 – 4.81 (m, 1H), 3.24 – 3.21 (m, 2H), 2.26 (s, 3H), 1.76 – 1.72 (m, 2H), 1.52 – 1.46 (m, 2H);  $^{13}\text{C}$  NMR (100 MHz,  $\text{CDCl}_3$ )  $\delta$  143.1, 134.4, 129.2, 126.5, 124.4, 108.0, 43.3, 20.9, 20.4, 20.3; HRMS (ESI)  $m/z$   $[\text{M}+\text{H}]^+$ : Calcd for  $\text{C}_{21}\text{H}_{15}\text{NO}_2\text{S}$ : 238.0902. Found: 238.0910.

### General procedure for the synthesis of the vinyl cyclopropylamides:

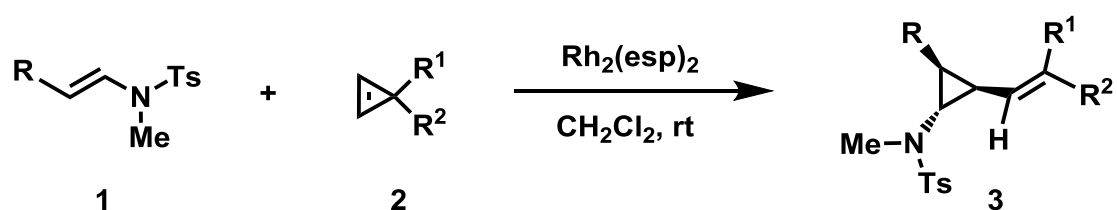

A mixture of enamide **1** (0.2 mmol, 1.0 equiv.), cyclopropane **2** (0.6 mmol, 3.0 equiv.) and Rh<sub>2</sub>(esp)<sub>2</sub> (1.5 mg, 0.002 mmol, 1.0 mol %) was dissolved in CH<sub>2</sub>Cl<sub>2</sub> (2.0 mL) in a Schlenk tube under N<sub>2</sub> protection. The mixture was stirred until the enamide **1** was consumed completely about 12 hours at room temperature. Then the mixture was concentrated directly under reduced pressure and purified by column chromatography (petroleum ether:ether acetate = 19 : 1) to give the vinyl cyclopropylamide **3**.

When the reaction was scaled up to 3.0 mmol, the Schlenk tube was replaced by Schlenk flask. An oven dried Schlenk tube was charged with **2a** (864 mg, 3.0 mmol, 1.0 equiv.), **1a** (1170 mg, 9.0 mmol, 3.0 equiv.) and Rh<sub>2</sub>(esp)<sub>2</sub> (22.8 mg, 0.03 mmol, 1.0 mol %) in dichloromethane (0.10 M, 30 mL). The tube was then sealed without inert gas protection and reacted at room temperature until **1a** was consumed completely. Then resulting reaction mixture was diluted with dichloromethane, washed with water and brine. The organic layer was dried over anhydrous Na<sub>2</sub>SO<sub>4</sub>, filtered, and

concentrated to give the crude product, which was purified through a flash column chromatography (eluent: 5% ethyl acetate in petroleum solution) to afford **3aa** (1.20 g, 2.881 mmol, 96% yield).

***N*-4-Dimethyl-*N*-((1*S*,2*R*,3*R*)-2-phenyl-3-((*E*)-2-phenylprop-1-en-1-yl)cyclopropyl) benzenesulfonamide (**3aa**):**

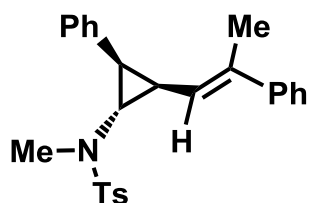

The title compound was prepared according to the general procedure. Purification by column chromatography (TLC  $R_f = 0.2$ ) on silica gel using EtOAc/PE (1:19) as the eluent the desired product **3aa** as yellow oil in 93% yield (77.6 mg, 0.186 mmol,  $E/Z = 98:2$ );  $^1\text{H}$  NMR (400 MHz,  $\text{CDCl}_3$ )  $\delta$  7.71 (d,  $J = 8.3$  Hz, 2H), 7.33 – 7.28 (m, 4H), 7.25 – 7.16 (m, 8H), 5.09 & 4.82 (dd,  $J_1 = 9.5$  Hz,  $J_2 = 1.4$  Hz & dd,  $J_1 = 9.8$  Hz,  $J_2 = 1.5$  Hz, 1H), 2.89 (s, 3H), 2.86 (dd,  $J_1 = 10.1$  Hz,  $J_2 = 4.3$  Hz, 1H), 2.76 – 2.68 (m, 1H), 2.44 (s, 3H), 2.27 (t,  $J = 4.0$  Hz, 1H), 2.22 (s, 3H).  $^{13}\text{C}$  NMR (100 MHz,  $\text{CDCl}_3$ )  $\delta$  143.7, 143.1, 137.7, 136.1, 132.3, 129.6, 128.7, 128.2, 128.1, 128.0, 126.7, 126.5, 125.4, 123.2, 45.7, 37.3, 32.3, 28.7, 21.5, 16.5; HRMS (ESI)  $m/z$   $[\text{M}+\text{H}]^+$ : Calcd for  $\text{C}_{26}\text{H}_{28}\text{NO}_2\text{S}$ : 418.1841. Found: 418.1848.

***N*-4-Dimethyl-*N*-((1*S*,2*R*,3*R*)-2-((*E*)-2-phenylprop-1-en-1-yl)-3-(*p*-tolyl)cyclopropyl) benzenesulfonamide (**3ba**):**

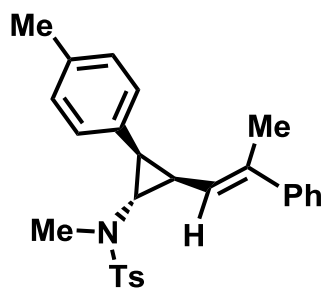

The title compound was prepared according to the general procedure. Purification by column chromatography (TLC  $R_f = 0.3$ ) on silica gel using EtOAc/PE (1:19) as the eluent the desired product **3ba** as yellow oil in 89% yield (76.7mg, 0.178 mmol,  $E/Z = 96:4$ );  $^1\text{H}$  NMR (400 MHz,  $\text{CDCl}_3$ )  $\delta$  7.68 (d,  $J = 8.1$  Hz, 2H), 7.29 (d,  $J = 7.9$  Hz, 2H), 7.25 – 7.21 (m, 2H), 7.19 – 7.16 (m, 3H) 7.10 – 7.02 (m, 4H), 5.09 & 4.80 (dd,  $J_1 = 9.6$  Hz,  $J_2 = 1.6$  Hz & dd,  $J_1 = 9.5$  Hz,  $J_2 = 1.7$  Hz, 1H), 2.86 (s, 3H), 2.79 (dd,  $J_1 = 10.1$  Hz,  $J_2 = 4.2$  Hz, 1H), 2.68 – 2.62 (m, 1H), 2.41 (s, 3H), 2.29 (s, 3H), 2.22 (t,  $J = 3.9$  Hz, 1H), 2.19 (s, 3H);  $^{13}\text{C}$  NMR (100 MHz,  $\text{CDCl}_3$ )  $\delta$  143.7, 143.2, 137.5, 136.0, 133.0, 132.5, 129.6, 128.9, 128.6, 128.0, 128.0, 126.6, 125.4, 123.4, 45.8, 37.3, 32.0, 28.7, 21.5, 21.0, 16.5; HRMS (ESI)  $m/z$   $[\text{M}+\text{H}]^+$ : Calcd for  $\text{C}_{27}\text{H}_{30}\text{NO}_2\text{S}$ : 432.1997. Found: 432.1992.

***N*-4-Dimethyl-*N*-((1*S*,2*R*,3*R*)-2-((*E*)-2-phenylprop-1-en-1-yl)-3-(4-propylphenyl)cyclopropyl) benzenesulfonamide (3ca):**

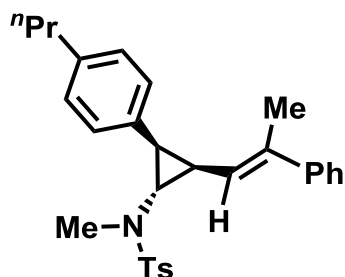

The title compound was prepared according to the general procedure. Purification by column chromatography (TLC  $R_f = 0.2$ ) on silica gel using EtOAc/PE (1:19) as the eluent the desired product **3ca** as yellow oil in 95% yield (87.2 mg, 0.190 mmol,  $E/Z = 94:6$ );  $^1\text{H}$  NMR (400 MHz,  $\text{CDCl}_3$ )  $\delta$  7.61 (d,  $J = 8.2$  Hz, 2H), 7.23 (d,  $J = 8.0$  Hz, 2H), 7.16-7.14 (m, 2H), 7.12 – 7.08 (m, 3H), 6.98 (s, 4H), 4.98 & 4.73 (dd,  $J_1 = 9.6$  Hz,  $J_2 = 1.4$  Hz & dd,  $J_1 = 9.7$  Hz,  $J_2 = 1.6$  Hz, 1H), 2.79 (s, 3H), 2.72 (dd,  $J_1 = 10.1$  Hz,  $J_2 = 4.2$  Hz, 1H), 2.62 – 2.56 (m, 1H), 2.48 – 2.44 (m, 2H), 2.35 (s, 3H), 2.15 (t,  $J = 4.0$  Hz, 1H), 2.13 (s, 3H), 1.54 – 1.52 (m, 2H), 0.84 (t,  $J = 7.4$  Hz, 3H);  $^{13}\text{C}$  NMR (100 MHz,  $\text{CDCl}_3$ )  $\delta$  143.7, 143.3, 140.9, 137.5, 133.4, 132.5, 129.6, 128.6, 128.3, 128.1, 126.7, 125.5, 123.6, 45.9, 37.6, 37.3, 32.0, 28.7, 24.5, 21.5, 16.5, 13.7; HRMS (ESI)  $m/z$   $[\text{M}+\text{H}]^+$ : Calcd for  $\text{C}_{29}\text{H}_{34}\text{NO}_2\text{S}$ : 460.2310. Found: 460.2319.

***N*-((1*S*,2*R*,3*R*)-2-([1,1'-Biphenyl]-4-yl)-3-((*E*)-2-phenylprop-1-en-1-yl)cyclopropyl)-*N*-4-dimethylbenzenesulfonamide (3da):**

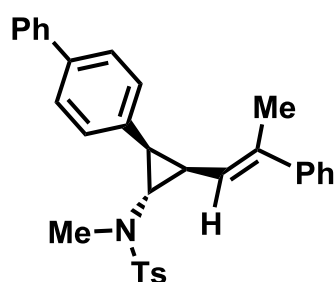

The title compound was prepared according to the general procedure. Purification by column chromatography (TLC  $R_f = 0.3$ ) on silica gel using EtOAc/PE (1:19) as the eluent the desired product **3da** as yellow oil in 93% yield (91.7 mg, 0.186mmol,  $E/Z = 98:2$ );  $^1\text{H}$  NMR (400 MHz,  $\text{CDCl}_3$ )  $\delta$  7.65 (d,  $J = 8.1$  Hz, 2H), 7.52 (d,  $J = 7.7$  Hz, 2H), 7.45 (d,  $J = 8.1$  Hz, 2H), 7.37 (t,  $J = 7.5$  Hz, 2H), 7.28 – 7.25 (m, 2H), 7.20 – 7.13 (m,

8H), 5.08 & 4.81 (dd,  $J_1 = 9.4$  Hz,  $J_2 = 1.3$  Hz & d,  $J = 9.8$  Hz, 1H), 2.84 (s, 3H), 2.81 (d,  $J = 8.0$  Hz, 1H), 2.70 – 2.63 (m, 1H), 2.38 (s, 3H), 2.24 (t,  $J = 4.0$  Hz, 1H), 2.16 (s, 3H);  $^{13}\text{C}$  NMR (100 MHz,  $\text{CDCl}_3$ )  $\delta$  143.8, 143.2, 140.7, 139.3, 137.9, 135.4, 132.4, 129.6, 129.2, 128.7, 128.1, 128.1, 127.2, 126.9, 126.9, 126.8, 125.5, 123.1, 46.0, 37.4, 32.2, 28.9, 21.6, 16.6; HRMS (ESI)  $m/z$   $[\text{M}+\text{H}]^+$ : Calcd for  $\text{C}_{32}\text{H}_{32}\text{NO}_2\text{S}$ : 494.2154. Found: 494.2160.

***N*-((1*S*,2*R*,3*R*)-2-(4-Methoxyphenyl)-3-((*E*)-2-phenylprop-1-en-1-yl)cyclopropyl)-*N*-4-dimethylbenzenesulfonamide (3ea):**

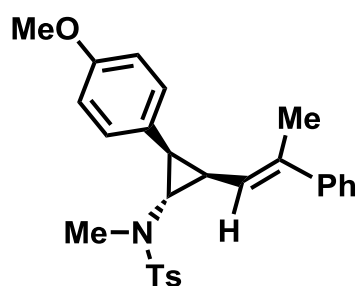

The title compound was prepared according to the general procedure. Purification by column chromatography (TLC  $R_f = 0.3$ ) on silica gel using EtOAc/PE (1:19) as the eluent the desired product **3ea** as yellow oil in 92% yield (82.2 mg, 0.184 mmol,  $E/Z = 97:3$ );  $^1\text{H}$  NMR (400 MHz,  $\text{CDCl}_3$ )  $\delta$  7.63 – 7.60 (m, 2H), 7.24 – 7.22 (m, 2H), 7.19 – 7.15 (m, 2H), 7.12 – 7.09 (m, 3H), 7.01 – 6.99 (m, 2H), 6.74 – 6.71 (m, 2H), 4.98 & 4.69 (d,  $J = 9.6$  Hz & d,  $J = 9.9$  Hz, 1H), 3.70 (s, 3H), 2.79 (s, 3H), 2.71 – 2.68 (m, 1H), 2.57 – 2.52 (m, 1H), 2.35 (s, 3H), 2.13 – 2.11 (m, 4H);  $^{13}\text{C}$  NMR (100 MHz,  $\text{CDCl}_3$ )  $\delta$  158.2, 143.7, 143.2, 137.4, 132.5, 129.9, 129.6, 128.2, 128.1, 128.1, 126.7, 125.4, 123.5, 113.6, 55.2, 46.0, 37.3, 31.7, 28.5, 21.5, 16.5; HRMS (ESI)  $m/z$   $[\text{M}+\text{H}]^+$ : Calcd for  $\text{C}_{27}\text{H}_{30}\text{NO}_3\text{S}$ : 448.1946. Found: 448.1943.

***N*-4-Dimethyl-*N*-((1*S*,2*R*,3*R*)-2-((*E*)-2-phenylprop-1-en-1-yl)-3-(4-(trifluoromethyl) phenyl)cyclopropyl) benzenesulfonamide (3fa):**

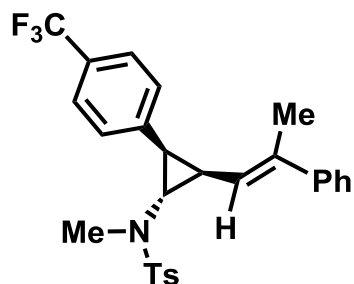

The title compound was prepared according to the general procedure. Purification by column chromatography (TLC  $R_f = 0.3$ ) on silica gel using EtOAc/PE (1:19) as the eluent the desired product **3fa** as yellow oil in 92% yield (89.2 mg, 0.184 mmol, *E/Z* = 95:5);  $^1\text{H}$  NMR (400 MHz,  $\text{CDCl}_3$ )  $\delta$  7.67 (d,  $J = 8.1$  Hz, 2H), 7.52 (d,  $J = 8.1$  Hz, 2H), 7.32 (d,  $J = 8.2$  Hz, 2H), 7.26 – 7.19 (m, 5H), 7.16 – 7.14 (m, 2H), 5.05 & 4.78 (d,  $J = 9.2$  Hz & d,  $J = 9.3$  Hz, 1H), 2.92 - 2.89 (m, 1H), 2.87 (s, 3H), 2.74 – 2.67 (m, 1H), 2.44 (s, 3H), 2.30 (t,  $J = 4.1$  Hz, 1H), 2.17 (s, 3H);  $^{19}\text{F}$  NMR (376 MHz,  $\text{CDCl}_3$ )  $\delta$  -62.2;  $^{13}\text{C}$  NMR (100 MHz,  $\text{CDCl}_3$ )  $\delta$  144.0, 142.9, 140.6, 138.9, 132.4, 129.7, 128.9, 128.2, 128.0, 127.0, 125.4, 125.1 (q,  $J = 4.1$  Hz), 122.2, 45.9, 37.3, 32.6, 28.9, 21.5, 16.6;  $^{19}\text{F}$  NMR (376 MHz,  $\text{CDCl}_3$ )  $\delta$  -62.3; HRMS (ESI)  $m/z$   $[\text{M}+\text{H}]^+$ : Calcd for  $\text{C}_{27}\text{H}_{27}\text{NF}_3\text{O}_2\text{S}$ : 486.1715. Found: 486.1723.

***N*-4-Dimethyl-*N*-((1*S*,2*R*,3*R*)-2-(4-nitrophenyl)-3-((*E*)-2-phenylprop-1-en-1-yl)cyclopropyl)benzenesulfonamide (3ga):**

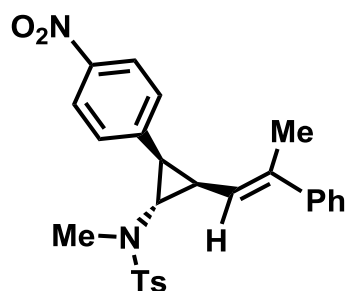

The title compound was prepared according to the general procedure. Purification by column chromatography (TLC  $R_f = 0.2$ ) on silica gel using EtOAc/PE (1:4) as the eluent the desired product **3ga** as yellow oil in 93% yield (85.9 mg, 0.186 mmol,  $E/Z = 98:2$ );  $^1\text{H}$  NMR (400 MHz,  $\text{CDCl}_3$ )  $\delta$  8.12 (d,  $J = 8.8$  Hz, 2H), 7.65 (d,  $J = 8.2$  Hz, 2H), 7.33 – 7.28 (m, 4H), 7.25 – 7.19 (m, 3H), 7.14 – 7.12 (m, 2H), 5.05 & 4.79 (dd,  $J_1 = 8.9$  Hz,  $J_2 = 1.4$  Hz & d,  $J = 8.9$  Hz, 1H), 2.95 (dd,  $J_1 = 10.1$  Hz,  $J_2 = 4.2$  Hz, 1H), 2.86 (s, 3H), 2.75 – 2.70 (m, 1H), 2.44 (s, 3H), 2.35 (t,  $J = 4.1$  Hz, 1H), 2.13 (s, 3H);  $^{13}\text{C}$  NMR (100 MHz,  $\text{CDCl}_3$ )  $\delta$  146.5, 144.5, 144.1, 142.6, 139.8, 132.3, 129.8, 129.2, 128.3, 128.0, 127.2, 125.4, 123.5, 121.4, 46.2, 37.2, 33.0, 29.5, 21.6, 16.7; HRMS (ESI)  $m/z$   $[\text{M}+\text{H}]^+$ : Calcd for  $\text{C}_{26}\text{H}_{27}\text{N}_2\text{O}_4\text{S}$ : 463.1692. Found: 463.1700.

***N*-((1*S*,2*R*,3*R*)-2-(4-Fluorophenyl)-3-((*E*)-2-phenylprop-1-en-1-yl)cyclopropyl)-*N*-4-dimethylbenzenesulfonamide (3ha):**

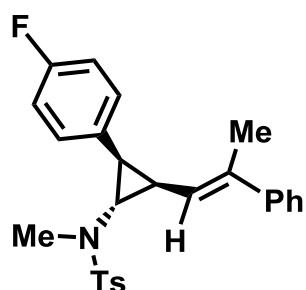

The title compound was prepared according to the general procedure. Purification by column chromatography (TLC  $R_f = 0.3$ ) on silica gel using EtOAc/PE (1:19) as the

eluent the desired product **3ha** as yellow oil in 88% yield (75.6 mg, 0.176 mmol, *E/Z* = 95:5); <sup>1</sup>H NMR (400 MHz, CDCl<sub>3</sub>) δ 7.68 (d, *J* = 8.1 Hz, 2H), 7.31 (d, *J* = 8.0 Hz, 2H), 7.25 – 7.22 (m, 2H), 7.20 – 7.11 (m, 5H), 6.95 (t, *J* = 8.6 Hz, 2H), 5.01 & 4.74 (dd, *J*<sub>1</sub> = 12.0 Hz, *J*<sub>2</sub> = 4.0 Hz & d, *J* = 9.5 Hz, 1H), 2.87 (s, 1H), 2.81 (dd, *J*<sub>1</sub> = 12.0 Hz, *J*<sub>2</sub> = 4.0 Hz, 1H), 2.68 – 2.60 (m, 1H), 2.43 (s, 1H), 2.21 (t, *J* = 3.9 Hz, 1H), 2.19 (s, 3H); <sup>19</sup>F NMR (376 MHz, CDCl<sub>3</sub>) δ -115.9; <sup>13</sup>C NMR (100 MHz, CDCl<sub>3</sub>) δ 143.8, 143.0, 138.0, 132.5, 131.9 (d, *J* = 10.0 Hz), 130.3 (d, *J* = 8.1 Hz), 129.6, 128.2, 128.0, 126.8, 125.4, 123.0, 115.2, 115.0, 46.0, 37.3, 31.8, 28.4, 21.5, 16.5; HRMS (ESI) *m/z* [M+H]<sup>+</sup>: Calcd for C<sub>26</sub>H<sub>27</sub>NFO<sub>2</sub>S: 436.1747. Found: 436.1750.

***N*-((1*S*,2*R*,3*R*)-2-(3-Fluorophenyl)-3-((*E*)-2-phenylprop-1-en-1-yl)cyclopropyl)-*N*-4-dimethylbenzenesulfonamide (3ia):**

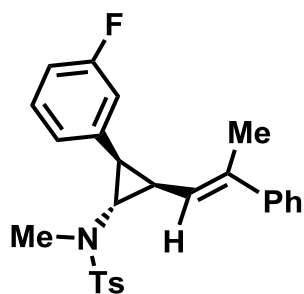

The title compound was prepared according to the general procedure. Purification by column chromatography (TLC *R*<sub>f</sub> = 0.3) on silica gel using EtOAc/PE (1:19) as the eluent the desired product **3ia** as yellow oil in 85% yield (73.9 mg, 0.170 mmol, *E/Z* > 99:1); <sup>1</sup>H NMR (400 MHz, CDCl<sub>3</sub>) δ 7.68 (d, *J* = 8.1 Hz, 2H), 7.32 (d, *J* = 8.0 Hz, 2H), 7.26 – 7.15 (m, 6H), 6.95 – 6.82 (m, 3H), 5.03 (dd, *J*<sub>1</sub> = 9.4 Hz, *J*<sub>2</sub> = 1.6 Hz, 1H), 2.86 (s, 3H), 2.85 – 2.82 (m, 1H), 2.67 (td, *J*<sub>1</sub> = 9.8 Hz, *J*<sub>2</sub> = 3.7 Hz, 1H), 2.43 (s, 3H), 2.24



(t,  $J = 4.0$  Hz, 1H), 2.18 (s, 3H);  $^{19}\text{F}$  NMR (376 MHz,  $\text{CDCl}_3$ )  $\delta$  -113.2;  $^{13}\text{C}$  NMR (100 MHz,  $\text{CDCl}_3$ )  $\delta$  162.6 (d,  $J = 244.6$  Hz), 143.5 (d,  $J = 87.4$  Hz), 138.9 (d,  $J = 7.7$  Hz), 138.4, 132.4, 129.7 (d,  $J = 7.1$  Hz), 129.7, 128.2, 128.0, 126.9, 125.4, 124.5 (d,  $J = 3.1$  Hz), 122.6, 115.5 (d,  $J = 21.6$  Hz), 113.5 (d,  $J = 20.9$  Hz), 45.8, 37.3, 32.3, 32.3, 28.9, 21.5, 16.6; HRMS (ESI)  $m/z$   $[\text{M}+\text{H}]^+$ : Calcd for  $\text{C}_{26}\text{H}_{27}\text{NFO}_2\text{S}$ : 436.1747. Found: 436.1743.

***N*-((1*S*,2*R*,3*R*)-2-(4-Chlorophenyl)-3-((*E*)-2-phenylprop-1-en-1-yl)cyclopropyl)-*N*-4-dimethylbenzenesulfonamide (3ja):**

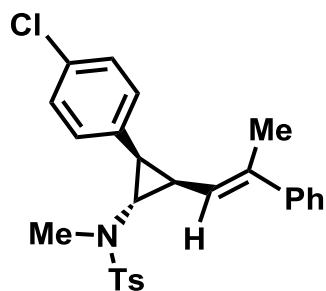

The title compound was prepared according to the general procedure. Purification by column chromatography (TLC  $R_f = 0.3$ ) on silica gel using EtOAc/PE (1:19) as the eluent the desired product **3ja** as yellow oil in 93% yield (83.3 mg, 0.186 mmol,  $E/Z = 94:6$ );  $^1\text{H}$  NMR (400 MHz,  $\text{CDCl}_3$ )  $\delta$  7.67 (d,  $J = 8.0$  Hz, 2H), 7.31 (d,  $J = 8.1$  Hz, 2H), 7.25 – 7.22 (m, 4H), 7.19 – 7.15 (m, 3H), 7.09 (d,  $J = 8.5$  Hz, 2H), 5.03 & 4.75 (dd,  $J_1 = 9.3$  Hz,  $J_2 = 1.7$  Hz & d,  $J = 9.2$  Hz, 1H), 2.86 (s, 3H), 2.81 (dd,  $J_1 = 12.0$  Hz,  $J_2 = 4.0$  Hz, 1H), 2.67 – 2.61 (m, 1H), 2.43 (s, 3H), 2.22 (t,  $J = 4.0$  Hz, 1H), 2.17 (s, 3H);  $^{13}\text{C}$  NMR (100 MHz,  $\text{CDCl}_3$ )  $\delta$  143.9, 143.0, 138.4, 134.8, 132.4, 132.3, 130.1, 129.7, 128.4, 128.2, 128.0, 126.9, 125.4, 122.6, 45.9, 37.3, 32.0, 28.6, 21.5, 16.6.; HRMS (ESI)  $m/z$   $[\text{M}+\text{H}]^+$ : Calcd for  $\text{C}_{26}\text{H}_{27}\text{NClO}_2\text{S}$ : 452.1451. Found: 452.1454.

***N*-((1*S*,2*R*,3*R*)-2-(4-Bromophenyl)-3-((*E*)-2-phenylprop-1-en-1-yl)cyclopropyl)-*N*-4-dimethylbenzenesulfonamide (3ka):**

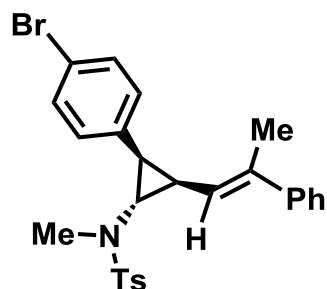

The title compound was prepared according to the general procedure. Purification by column chromatography (TLC  $R_f = 0.2$ ) on silica gel using EtOAc/PE (1:19) as the eluent the desired product **3ka** as yellow oil in 92% yield (91.1 mg, 0.184 mmol, *E/Z* = 99:1);  $^1\text{H}$  NMR (400 MHz,  $\text{CDCl}_3$ )  $\delta$  7.67 (d,  $J = 8.2$  Hz, 2H), 7.39 – 7.37 (m, 2H), 7.32 – 7.30 (m, 2H), 7.26 – 7.23 (m, 2H), 7.21 – 7.16 (m, 3H), 7.04 – 7.02 (m, 2H), 5.03 & 4.75 (d,  $J = 9.3$  Hz & d,  $J = 9.6$  Hz, 1H), 2.86 (s, 3H), 2.80 (dd,  $J_1 = 10.1$  Hz,  $J_2 = 4.2$  Hz, 1H), 2.67 – 2.61 (m, 1H), 2.43 (s, 3H), 2.23 – 2.21 (m, 1H), 2.17 (s, 3H);  $^{13}\text{C}$  NMR (100 MHz,  $\text{CDCl}_3$ )  $\delta$  143.9, 142.9, 138.4, 135.4, 132.4, 131.3, 130.4, 129.7, 128.2, 128.0, 126.9, 125.4, 122.6, 120.4, 45.9, 37.3, 32.1, 28.6, 21.5, 16.6; HRMS (ESI)  $m/z$   $[\text{M}+\text{H}]^+$ : Calcd for  $\text{C}_{26}\text{H}_{27}\text{NBrO}_2\text{S}$ : 496.0946. Found: 496.0954.

***(E)*-*N*-4-Dimethyl-*N*-(2-(2-phenylprop-1-en-1-yl)-3-tridecylcyclopropyl)benzenesulfonamide (3la):**

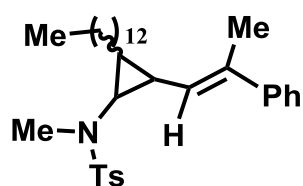

The title compound was prepared according to the general procedure. Purification by column chromatography (TLC  $R_f = 0.3$ ) on silica gel using EtOAc/PE (1:19) as the eluent the desired product **3la** as yellow oil in 91% yield (95.2 mg, 0.182 mmol, *d.r.* = 79:21);  $^1\text{H}$  NMR (400 MHz,  $\text{CDCl}_3$ )  $\delta$  7.65 – 7.58 (m, 2H), 7.31 – 7.27 (m, 2H), 7.25 – 7.22 (m, 4H), 7.19 – 7.13 (m, 2H), 5.54 & 5.23 (dd,  $J_1 = 9.6$  Hz,  $J_2 = 1.4$  Hz & dd,  $J_1 = 12.0$  Hz,  $J_2 = 4.0$  Hz, 1H), 2.70 & 2.64 & 2.56 & 2.51 (m, 1H), 2.68 & 2.60 (s, 3H), 2.37 & 2.36 (s, 3H), 2.19 – 2.14 & 1.99 – 1.97 (m, 1H), 2.11 & 2.04 (s, 3H), 1.50 – 1.47 (m, 1H), 1.20 – 1.15 (m, 24H), 0.80 (t,  $J = 6.8$  Hz, 3H);  $^{13}\text{C}$  NMR (100 MHz,  $\text{CDCl}_3$ )  $\delta$  143.5, 137.4, 132.7, 129.5, 128.2, 128.0, 126.7, 125.4, 125.3, 124.0, 46.8, 44.8, 37.2, 31.9, 29.7, 29.6, 29.6, 29.6, 29.5, 29.4, 29.3, 29.0, 28.5, 27.7, 26.0, 22.7, 21.5, 16.3, 14.1; HRMS (ESI)  $m/z$   $[\text{M}+\text{H}]^+$ : Calcd for  $\text{C}_{33}\text{H}_{50}\text{NO}_2\text{S}$ : 524.3562. Found: 524.3566.

***N*-(2-(2,2-Diphenylvinyl)-3-ethylcyclopropyl)-*N*-4-dimethylbenzenesulfonamide**

(**3la'**):

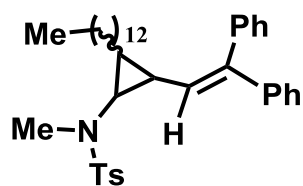

The title compound was prepared according to the general procedure. Purification by column chromatography (TLC  $R_f = 0.2$ ) on silica gel using EtOAc/PE (1:19) as the eluent the desired product **3la'** as yellow oil in 93% yield (111.5 mg, 0.186 mmol, *d.r.* = 75:45);  $^1\text{H}$  NMR (400 MHz,  $\text{CDCl}_3$ )  $\delta$  7.71 – 7.68 (m, 2H), 7.40 – 7.15 (m, 12H), 5.90 & 5.57 (d,  $J = 10.3$  Hz & d,  $J = 10.3$  Hz, 1H), 2.76 & 2.63 (s, 3H), 2.44 & 2.43 (s,

3H), 1.99 – 1.93 & 1.73 – 1.25 (m, 27H), 0.98 – 0.86 (m, 3H);  $^{13}\text{C}$  NMR (100 MHz,  $\text{CDCl}_3$ )  $\delta$  143.6, 143.5, 143.4, 142.5, 142.1, 141.6, 140.2, 139.7, 132.9, 132.6, 130.1, 130.0, 129.5, 129.5, 128.3, 128.2, 128.1, 128.1, 128.0, 128.0, 127.3, 127.2, 127.1, 127.0, 126.9, 126.9, 125.7, 47.3, 45.4, 37.7, 37.0, 31.9, 31.7, 30.9, 29.7, 29.6, 29.6, 29.5, 29.3, 29.0, 28.4, 27.9, 26.6, 26.0, 22.7, 21.5, 21.5, 14.1; HRMS (ESI)  $m/z$   $[\text{M}+\text{H}]^+$ : Calcd for  $\text{C}_{38}\text{H}_{52}\text{NO}_2\text{S}$ : 586.3719. Found: 586.3724.

**(E)-N-4-Dimethyl-N-(3-(2-phenylprop-1-en-1-yl)-[1,1'-bi(cyclopropan)]-2-yl)benzenesulfonamide (3ma):**

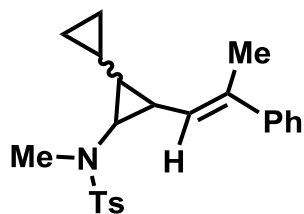

The title compound was prepared according to the general procedure. Purification by column chromatography (TLC  $R_f$  = 0.4) on silica gel using EtOAc/PE (1:19) as the eluent the desired product **3ma** as yellow oil in 91% yield (69.3 mg, 0.182 mmol, *d.r.* = 80:20);  $^1\text{H}$  NMR (400 MHz,  $\text{CDCl}_3$ )  $\delta$  7.75 & 7.71 (d,  $J$  = 8.1 Hz & d,  $J$  = 8.0 Hz, 2H), 7.36 – 7.30 (m, 6H), 7.24 – 7.19 (m, 1H), 5.56 & 5.45 (dd,  $J_1$  = 9.6 Hz,  $J_2$  = 1.5 Hz &  $J_1$  = 9.4 Hz,  $J_2$  = 1.5 Hz, 1H), 2.71 & 2.64 (s, 3H), 2.44 & 2.43 (m, 3H), 2.24 – 2.20 & 1.85 – 1.82 (m, 1H), 2.19 & 2.10 (s, 3H), 1.62 – 1.58 (m, 1H), 1.43 – 1.38 (m, 1H), 1.24 (s, 1H), 0.58 – 0.48 (m, 3H), 0.35 – 0.34 (m, 1H);  $^{13}\text{C}$  NMR (100 MHz,  $\text{CDCl}_3$ )  $\delta$  143.6, 143.4, 137.3, 132.4, 129.6, 128.2, 128.0, 126.7, 125.4, 124.2, 45.7,

37.3, 31.9, 26.4, 21.6, 16.4, 8.4, 4.8, 4.7; HRMS (ESI)  $m/z$   $[M+H]^+$ : Calcd for  $C_{23}H_{28}NO_2S$ : 382.1841. Found: 382.1838.

**(E)-N-(2-Cyclohexyl-3-(2-phenylprop-1-en-1-yl)cyclopropyl)-N-4-dimethylbenzenesulfonamide (3na):**

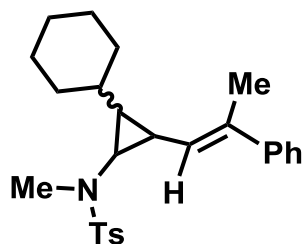

The title compound was prepared according to the general procedure. Purification by column chromatography (TLC  $R_f$  = 0.4) on silica gel using EtOAc/PE (1:19) as the eluent the desired product **3na** as yellow oil in 91% yield (76.5 mg, 0.182 mmol, *d.r.* = 82:18);  $^1H$  NMR (400 MHz,  $CDCl_3$ )  $\delta$  7.73 & 7.69 (d,  $J$  = 8.3 Hz & d,  $J$  = 8.3 Hz, 2H), 7.38 – 7.28 & 7.26 – 7.19 (m, 7H), 5.61 & 5.32 (dd,  $J_1$  = 9.6 Hz,  $J_2$  = 1.3 Hz & dd,  $J_1$  = 9.9 Hz,  $J_2$  = 1.3 Hz, 1H), 2.75 & 2.70 (s, 3H), 2.43 & 2.42 (s, 3H), 2.37 (td,  $J$  = 9.9 Hz & td,  $J$  = 3.3 Hz, 1H), 2.21 & 2.13 (s, 3H), 2.07 – 2.04 & 1.78 – 1.59 & 1.23 – 1.00 & 0.92 – 0.82 (m, 13H);  $^{13}C$  NMR (100 MHz,  $CDCl_3$ )  $\delta$  143.7, 143.5, 137.3, 132.7, 129.5, 128.2, 128.0, 126.6, 125.5, 124.1, 45.8, 37.3, 36.7, 34.1, 33.0, 32.1, 26.6, 26.2, 26.0, 25.9, 21.5, 16.4; HRMS (ESI)  $m/z$   $[M+H]^+$ : Calcd for  $C_{26}H_{34}NO_2S$ : 424.2310. Found: 424.2302.

**N-4-Dimethyl-N-(2-(2-phenylprop-1-en-1-yl)cyclopropyl)benzenesulfonamide**

**(3oa):**

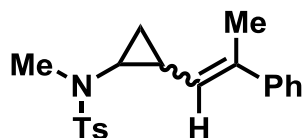

The title compound was prepared according to the general procedure. Purification by column chromatography (TLC  $R_f = 0.4$ ) on silica gel using EtOAc/PE (1:19) as the eluent the desired product **3oa** as yellow oil in 92% yield (62.7 mg, 0.184 mmol, *d.r.* > 99:1);  $^1\text{H}$  NMR (400 MHz,  $\text{CDCl}_3$ )  $\delta$  7.71 (d,  $J = 8.2$  Hz, 2H), 7.37 – 7.28 (m, 6H), 7.23 - 7.20 (m, 1H), 5.57 (dd,  $J_1 = 9.7$  Hz,  $J_2 = 1.5$  Hz, 1H), 2.68 (s, 3H), 2.43 (s, 3H), 2.10 (s, 3H), 2.00 – 1.96 (m, 1H), 1.82 – 1.74 (m, 1H), 1.45 – 1.41 (m, 1H), 1.36 – 1.32 (m, 1H);  $^{13}\text{C}$  NMR (100 MHz,  $\text{CDCl}_3$ )  $\delta$  143.6, 143.1, 135.9, 132.6, 129.6, 128.2, 128.0, 126.7, 125.5, 125.4, 38.4, 37.7, 21.6, 17.7, 16.8, 16.2; HRMS (ESI)  $m/z$   $[\text{M}+\text{H}]^+$ : Calcd for  $\text{C}_{26}\text{H}_{34}\text{NO}_2\text{S}$ : 342.1528. Found: 342.1525.

**(S)-N-4-Dimethyl-N-(1-methyl-2-(2-phenylprop-1-en-1-yl)cyclopropyl)benzenesulfonamide (3pa):**

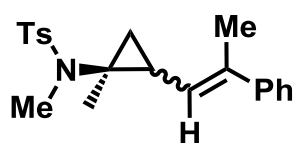

The title compound was prepared according to the general procedure. Purification by column chromatography (TLC  $R_f = 0.3$ ) on silica gel using EtOAc/PE (1:19) as the eluent the desired product **3pa** as yellow oil in 83% yield (59.0 mg, 0.166 mmol, *d.r.* = 79:21);  $^1\text{H}$  NMR (400 MHz,  $\text{CDCl}_3$ )  $\delta$  7.72 (d,  $J = 8.3$  Hz, 2H), 7.44 – 7.42 (m, 1H), 7.36 – 7.31 (m, 5H), 7.25 – 7.20 (m, 1H), 5.83 & 5.32 (dd,  $J_1 = 8.2$  Hz,  $J_2 = 1.4$  Hz, 1H) & dd,  $J_1 = 8.9$  Hz,  $J_2 = 1.4$  Hz, 1H), 2.87 & 2.83 (s, 3H), 2.43 & 2.41 (s, 3H), 2.21 &

2.18 (s, 3H), 2.15 – 2.06 (m, 1H), 1.62 & 1.29 (s, 3H), 1.16 – 1.11 & 1.58 – 1.55 (m, 2H);  $^{13}\text{C}$  NMR (100 MHz,  $\text{CDCl}_3$ )  $\delta$  148.9, 143.6, 143.2, 138.0, 137.5, 129.5, 128.4, 128.2, 128.2, 127.4, 127.3, 126.7, 126.6, 125.9, 125.5, 125.2, 123.2, 41.4, 34.4, 34.0, 30.8, 29.6, 27.3, 22.8, 22.7, 21.5, 17.8, 16.6, 16.1; HRMS (ESI)  $m/z$   $[\text{M}+\text{H}]^+$ : Calcd for  $\text{C}_{26}\text{H}_{34}\text{NO}_2\text{S}$ : 356.1684. Found: 356.1680.

**7-(2-Phenylprop-1-en-1-yl)-2-tosyl-2-azabicyclo[4.1.0]heptane (3qa):**

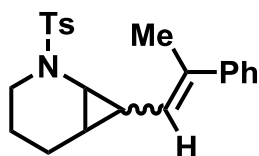

The title compound was prepared according to the general procedure. Purification by column chromatography (TLC  $R_f$  = 0.4) on silica gel using EtOAc/PE (1:19) as the eluent the desired product **3qa** as yellow oil in 67% yield (51.1 mg, 0.134 mmol, *E/Z* > 99:1);  $^1\text{H}$  NMR (400 MHz,  $\text{CDCl}_3$ )  $\delta$  7.73 (d,  $J$  = 8.3 Hz, 2H), 7.30 – 7.27 (m, 4H), 7.25 – 7.19 (m, 3H), 5.52 (dd,  $J_1$  = 6.9 Hz,  $J_2$  = 1.3 Hz, 1H), 3.48 – 3.44 (m, 1H), 3.03 – 3.00 (m, 1H), 2.70 – 2.64 (m, 1H), 2.34 (s, 3H), 2.09 (s, 3H), 1.79 – 1.70 (m, 2H), 1.63 – 1.51 (m, 2H), 1.49 – 1.40 (m, 2H);  $^{13}\text{C}$  NMR (100 MHz,  $\text{CDCl}_3$ )  $\delta$  143.2, 142.8, 137.9, 135.9, 129.5, 128.0, 127.2, 126.5, 125.3, 121.5, 43.3, 33.4, 23.6, 21.4, 20.4, 16.7, 16.5, 15.2; HRMS (ESI)  $m/z$   $[\text{M}+\text{H}]^+$ : Calcd for  $\text{C}_{26}\text{H}_{34}\text{NO}_2\text{S}$ : 368.1684. Found: 368.1680.

***N*-((1*S*,2*R*,3*R*)-2-((*E*)-2-(4-Bromophenyl)prop-1-en-1-yl)-3-(4-nitrophenyl)cyclopropyl)-*N*-4-dimethylbenzenesulfonamide (3ra):**

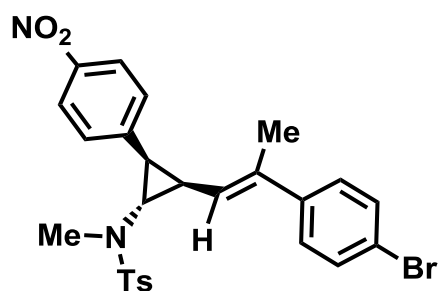

The title compound was prepared according to the general procedure. Purification by column chromatography (TLC  $R_f$  = 0.3) on silica gel using EtOAc/PE (1:4) as the eluent the desired product **3ra** as yellow solid in 95% yield (102.6 mg, 0.190 mmol,  $E/Z$  = 98:2); Mp. 52 – 53 °C;  $^1\text{H}$  NMR (400 MHz,  $\text{CDCl}_3$ )  $\delta$  8.11 (d,  $J$  = 8.7 Hz, 2H), 7.64 (d,  $J$  = 8.3 Hz, 2H), 7.34 – 7.25 (m, 6H), 6.99 (d,  $J$  = 8.5 Hz, 2H), 5.04 & 4.81 (dd,  $J_1$  = 9.0 Hz,  $J_2$  = 1.4 Hz & d,  $J$  = 9.9 Hz, 1H), 2.96 (dd,  $J_1$  = 10.2 Hz,  $J_2$  = 4.3 Hz, 1H), 2.86 (s, 3H), 2.74 – 2.68 (m, 1H), 2.43 (s, 3H), 2.36 (t,  $J$  = 4.2 Hz, 1H), 2.10 (s, 3H);  $^{13}\text{C}$  NMR (100 MHz,  $\text{CDCl}_3$ )  $\delta$  146.6, 144.4, 144.2, 141.4, 138.7, 132.4, 131.3, 129.8, 129.2, 128.0, 127.0, 123.5, 122.1, 121.1, 46.2, 37.2, 33.0, 29.5, 21.6, 16.5; HRMS (ESI)  $m/z$   $[\text{M}+\text{H}]^+$ : Calcd for  $\text{C}_{26}\text{H}_{26}\text{N}_2\text{BrO}_4\text{S}$ : 541.0797. Found: 541.0791.

***N*-((1*S*,2*R*,3*R*)-2-((*E*)-2-(4-Fluorophenyl)prop-1-en-1-yl)-3-phenylcyclopropyl)-*N*-4-dimethylbenzenesulfonamide (**3ab**):**

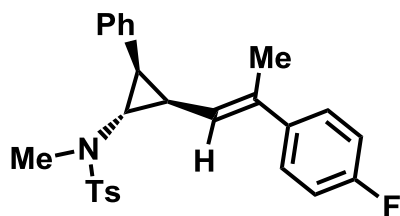

The title compound was prepared according to the general procedure. Purification by column chromatography (TLC  $R_f$  = 0.2) on silica gel using EtOAc/PE (1:19) as the eluent the desired product **3ab** as yellow oil in 88% yield (76.7 mg, 0.176 mmol,  $E/Z$  =



99:1);  $^1\text{H}$  NMR (400 MHz,  $\text{CDCl}_3$ )  $\delta$  7.68 (d,  $J = 7.9$  Hz, 2H), 7.32 – 7.25 (m, 4H), 7.22 – 7.19 (m, 1H), 7.15 – 7.09 (m, 4H), 6.93 – 6.89 (m, 2H), 4.99 & 4.09 (dd,  $J_1 = 9.4$  Hz,  $J_2 = 1.6$  Hz & d,  $J = 6.5$  Hz, 1H), 2.87 (s, 3H), 2.83 (dd,  $J_1 = 10.1$  Hz,  $J_2 = 4.3$  Hz, 1H), 2.66 (td,  $J_1 = 9.8$  Hz,  $J_2 = 3.6$  Hz, 1H), 2.43 (s, 1H), 2.26 (t,  $J = 4.0$  Hz, 1H), 2.17 (s, 3H);  $^{19}\text{F}$  NMR (376 MHz,  $\text{CDCl}_3$ )  $\delta$  -116.0;  $^{13}\text{C}$  NMR (100 MHz,  $\text{CDCl}_3$ )  $\delta$  143.8, 139.3 (d,  $J = 3.4$  Hz), 136.8, 136.2, 132.5, 129.6, 128.8, 128.2, 128.1, 127.0, 126.9, 126.2, 123.2 (d,  $J = 1.9$  Hz), 114.9 (d,  $J = 21.2$  Hz), 45.7, 37.3, 32.4, 28.7, 21.5, 16.7; HRMS (ESI)  $m/z$   $[\text{M}+\text{H}]^+$ : Calcd for  $\text{C}_{26}\text{H}_{27}\text{NFO}_2\text{S}$ : 436.1747. Found: 436.1742.

***N*-((1*S*,2*R*,3*R*)-2-((*E*)-2-(4-Chlorophenyl)prop-1-en-1-yl)-3-phenylcyclopropyl)-*N*-4-dimethylbenzenesulfonamide (**3ac**):**

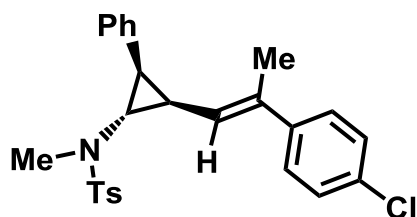

The title compound was prepared according to the general procedure. Purification by column chromatography (TLC  $R_f = 0.2$ ) on silica gel using EtOAc/PE (1:19) as the eluent the desired product **3ac** as yellow oil in 93% yield (84.1 mg, 0.186 mmol,  $E/Z = 95:5$ );  $^1\text{H}$  NMR (400 MHz,  $\text{CDCl}_3$ )  $\delta$  7.68 (d,  $J = 8.2$  Hz, 2H), 7.34 – 7.28 (m, 3H), 7.25 – 7.21 (m, 2H), 7.20 – 7.13 (m, 4H), 7.08 – 7.06 (m, 2H), 5.04 & 4.82 (dd,  $J_1 = 9.5$  Hz,  $J_2 = 1.5$  Hz & dd,  $J_1 = 9.9$  Hz,  $J_2 = 1.7$  Hz, 1H), 2.87 (s, 3H), 2.86 – 2.82 (m, 1H), 2.72 – 2.64 (m, 1H), 2.43 (s, 1H), 2.27 (t,  $J = 4.0$  Hz, 1H), 2.16 (s, 3H);  $^{13}\text{C}$  NMR (100 MHz,  $\text{CDCl}_3$ )  $\delta$  144.0, 141.7, 136.8, 136.2, 132.6, 129.8, 128.9, 128.4, 128.3,

128.2, 126.8, 126.7, 124.0, 45.9, 37.5, 32.6, 28.9, 21.7, 16.6; HRMS (ESI)  $m/z$   $[M+H]^+$ :

Calcd for  $C_{26}H_{27}NClO_2S$ : 452.1451. Found: 452.1446.

***N*-((1*S*,2*R*,3*R*)-2-((*E*)-2-(4-Bromophenyl)prop-1-en-1-yl)-3-phenylcyclopropyl)-*N*-4-dimethylbenzenesulfonamide (3ad):**

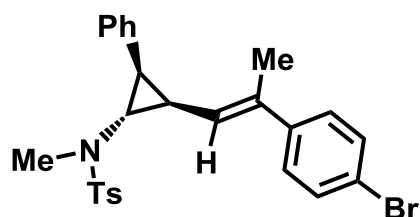

The title compound was prepared according to the general procedure. Purification by column chromatography (TLC  $R_f$  = 0.3) on silica gel using EtOAc/PE (1:19) as the eluent the desired product **3ad** as yellow oil in 95% yield (94.2 mg, 0.190 mmol, *E/Z* = 94:6);  $^1H$  NMR (400 MHz,  $CDCl_3$ )  $\delta$  7.67 (d,  $J$  = 8.2 Hz, 2H), 7.34 – 7.24 (m, 6H), 7.21 – 7.12 (m, 3H), 7.01 (d,  $J$  = 8.0 Hz, 2H), 5.04 & 4.82 (d,  $J$  = 9.5 Hz & d,  $J$  = 9.9 Hz, 1H), 2.87 (s, 3H), 2.86 – 2.82 (m, 1H), 2.71 – 2.64 (m, 1H), 2.43 (s, 3H), 2.27 (t,  $J$  = 4.0 Hz, 1H), 2.16 (s, 3H);  $^{13}C$  NMR (100 MHz,  $CDCl_3$ )  $\delta$  143.8, 142.0, 136.7, 136.1, 132.4, 131.1, 129.6, 128.7, 128.3, 128.0, 127.0, 126.6, 124.0, 120.5, 45.7, 37.3, 32.4, 28.8, 21.5, 16.4; HRMS (ESI)  $m/z$   $[M+H]^+$ : Calcd for  $C_{26}H_{27}NBrO_2S$ : 496.0946. Found: 496.0938.

***N*-((1*S*,2*R*,3*R*)-2-(2-(2-Chlorophenyl)prop-1-en-1-yl)-3-phenylcyclopropyl)-*N*-4-dimethylbenzenesulfonamide (3ae):**

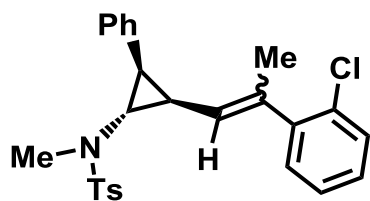

The title compound was prepared according to the general procedure. Purification by column chromatography (TLC  $R_f = 0.3$ ) on silica gel using EtOAc/PE (1:19) as the eluent the desired product **3ae** as yellow oil in 93% yield (84.1 mg, 0.186 mmol,  $E/Z = 82:18$ );  $^1\text{H NMR}$  (400 MHz,  $\text{CDCl}_3$ )  $\delta$  7.74 & 7.65 (d,  $J = 8.1$  Hz & d,  $J = 8.0$  Hz, 2H), 7.41 (d,  $J = 7.6$  Hz, 1H), 7.33 – 7.27 (m, 5H), 7.25 – 7.15 (m, 4H), 7.13 – 7.10 & 6.95 – 6.92 (m, 1H), 4.82 & 4.70 (d,  $J = 10.0$  Hz & dd,  $J_1 = 8.9$  Hz,  $J_2 = 1.6$  Hz, 1H), 2.89 & 2.63 (s, 3H), 2.81 – 2.71 (m, 1H), 2.44 & 2.43 (s, 3H), 2.26 & 2.19 (t,  $J = 4.0$  Hz & t,  $J = 4.0$  Hz, 1H), 2.16 & 1.87 (s, 3H);  $^{13}\text{C NMR}$  (100 MHz,  $\text{CDCl}_3$ )  $\delta$  143.8, 143.7, 143.6, 140.5, 137.9, 136.4, 136.1, 132.8, 132.4, 132.1, 130.2, 129.9, 129.7, 129.6, 129.4, 128.9, 128.4, 128.2, 128.2, 128.2, 128.0, 127.9, 127.0, 126.5, 126.4, 126.2, 45.5, 44.8, 37.4, 36.8, 31.8, 28.3, 21.5, 18.1; HRMS (ESI)  $m/z$   $[\text{M}+\text{H}]^+$ : Calcd for  $\text{C}_{26}\text{H}_{27}\text{NCIO}_2\text{S}$ : 452.1451. Found: 452.1454.

***N*-4-Dimethyl-*N*-((1*S*,2*R*,3*R*)-2-phenyl-3-(2-(*o*-tolyl)prop-1-en-1-yl)cyclopropyl)benzenesulfonamide (**3af**):**

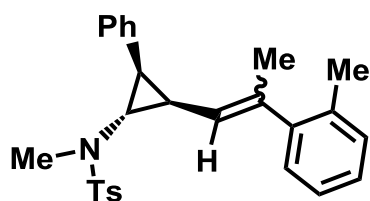

The title compound was prepared according to the general procedure. Purification by column chromatography (TLC  $R_f = 0.3$ ) on silica gel using EtOAc/PE (1:19) as the

eluent the desired product **3af** as yellow oil in 93% yield (80.5 mg, 0.186 mmol, *E/Z* = 78:22); <sup>1</sup>H NMR (400 MHz, CDCl<sub>3</sub>) δ 7.72 & 7.64 (d, *J* = 8.2 Hz & d, *J* = 8.1 Hz, 2H), 7.34 – 7.29 (m, 4H), 7.26 – 7.16 (m, 5H), 7.12 – 7.05 & 6.92 – 6.90 (m, 2H), 4.80 & 4.62 (dd, *J*<sub>1</sub> = 10.0 Hz, *J*<sub>2</sub> = 1.7 Hz & dd, *J*<sub>1</sub> = 8.9 Hz, *J*<sub>2</sub> = 1.6 Hz, 1H), 2.87 & 2.59 (s, 3H), 2.80 – 2.68 (m, 1H), 2.44 & 2.43 (s, 3H), 2.27 (t, *J* = 4.0 Hz, 1H), 2.23 & 2.06 (s, 3H), 2.22 – 2.20 (m, 1H), 1.82 (s, 3H); <sup>13</sup>C NMR (100 MHz, CDCl<sub>3</sub>) δ 144.9, 143.8, 143.6, 139.6, 136.6, 136.3, 134.7, 132.9, 132.5, 130.1, 129.9, 129.5, 128.7, 128.2, 128.2, 128.1, 128.1, 128.0, 128.0, 126.9, 126.5, 126.4, 126.3, 125.9, 125.4, 124.5, 122.5, 45.3, 37.4, 36.6, 32.6, 31.9, 29.7, 28.6, 27.8, 21.5, 19.6, 19.1, 18.8; HRMS (ESI) *m/z* [M+H]<sup>+</sup>: Calcd for C<sub>27</sub>H<sub>30</sub>NO<sub>2</sub>S: 432.1997. Found: 432.2004.

***N*-4-Dimethyl-*N*-((1*S*,2*R*,3*R*)-2-phenyl-3-((*E*)-2-(*m*-tolyl)prop-1-en-1-yl)cyclopropyl) benzenesulfonamide (**3ag**):**

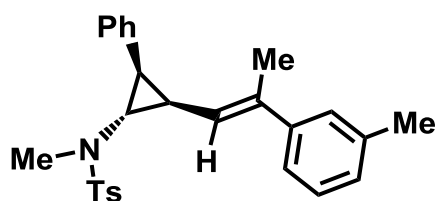

The title compound was prepared according to the general procedure. Purification by column chromatography (TLC *R*<sub>f</sub> = 0.3) on silica gel using EtOAc/PE (1:19) as the eluent the desired product **3ag** as colorless oil in 91% yield (80.4 mg, 0.182 mmol, *E/Z* = 99:1); <sup>1</sup>H NMR (400 MHz, CDCl<sub>3</sub>) δ 7.69 (d, *J* = 8.3 Hz, 2H) 7.31 – 7.24 (m, 4H), 7.21 – 7.10 (m, 4H), 7.00 – 6.94 (m, 3H), 5.05 (dd, *J*<sub>1</sub> = 9.4 Hz, *J*<sub>2</sub> = 1.5 Hz, 1H), 2.88 (s, 3H), 2.83 (dd, *J*<sub>1</sub> = 10.1 Hz, *J*<sub>2</sub> = 4.4 Hz, 1H), 2.67 (td, *J*<sub>1</sub> = 9.8 Hz, *J*<sub>2</sub> = 3.8 Hz, 1H), 2.43 (s, 3H), 2.28 (s, 3H), 2.26 (t, *J* = 4.0 Hz, 1H), 2.17 (s, 3H); <sup>13</sup>C NMR (100 MHz,

CDCl<sub>3</sub>)  $\delta$  143.7, 143.3, 137.9, 137.6, 136.3, 132.6, 129.6, 128.8, 128.2, 128.1, 128.0, 127.5, 126.5, 126.3, 123.1, 122.6, 45.9, 37.3, 32.4, 28.7, 21.5, 21.4, 16.6; HRMS (ESI)  $m/z$  [M+H]<sup>+</sup>: Calcd for C<sub>27</sub>H<sub>30</sub>NO<sub>2</sub>S: 432.1997. Found: 432.1993.

***N*-4-Dimethyl-*N*-((1*S*,2*R*,3*R*)-2-phenyl-3-((*E*)-2-(*p*-tolyl)prop-1-en-1-yl)cyclopropyl) benzenesulfonamide (3ah):**

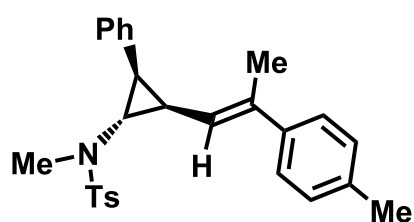

The title compound was prepared according to the general procedure. Purification by column chromatography (TLC R<sub>f</sub> = 0.3) on silica gel using EtOAc/PE (1:19) as the eluent the desired product **3ah** as yellow oil in 89% yield (77.1 mg, 0.178 mmol, *E/Z* = 98:2); <sup>1</sup>H NMR (400 MHz, CDCl<sub>3</sub>)  $\delta$  7.70 – 7.67 (m, 2H), 7.31 – 7.28 (m, 2H), 7.27 – 7.23 (m, 2H), 7.20 – 7.13 (m, 4H), 7.08 – 7.02 (m, 3H), 5.04 & 4.77 (d, *J* = 9.4 Hz & *J* = 9.7 Hz, 1H), 2.87 (s, 3H), 2.82 (dd, *J*<sub>1</sub> = 10.2 Hz, *J*<sub>2</sub> = 4.2 Hz, 1H), 2.73 – 2.64 (m, 1H), 2.42 (s, 3H), 2.29 (s, 3H), 2.24 (t, *J* = 3.9 Hz, 1H), 2.17 (s, 3H); <sup>13</sup>C NMR (100 MHz, CDCl<sub>3</sub>)  $\delta$  143.7, 140.3, 137.6, 136.4, 136.3, 132.4, 129.6, 128.8, 128.8, 128.2, 128.1, 126.4, 125.3, 122.3, 45.8, 37.3, 32.4, 28.7, 21.5, 20.9, 16.5; HRMS (ESI)  $m/z$  [M+H]<sup>+</sup>: Calcd for C<sub>27</sub>H<sub>30</sub>NO<sub>2</sub>S: 432.1997. Found: 432.1993.

***N*-((1*S*,2*R*,3*R*)-2-(2-(4-Methoxyphenyl)prop-1-en-1-yl)-3-phenylcyclopropyl)-*N*-4-dimethylbenzenesulfonamide (3ai):**

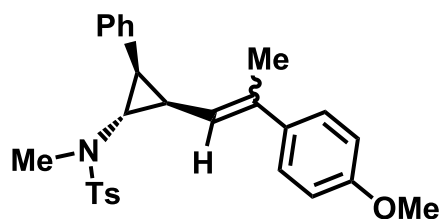

The title compound was prepared according to the general procedure. Purification by column chromatography (TLC  $R_f = 0.2$ ) on silica gel using EtOAc/PE (1:19) as the eluent the desired product **3ai** as yellow oil in 93% yield (76.0 mg, 0.186 mmol,  $E/Z = 93:7$ );  $^1\text{H}$  NMR (400 MHz,  $\text{CDCl}_3$ )  $\delta$  7.60 (d,  $J = 8.3$  Hz, 2H), 7.23 – 7.19 (m, 2H), 7.18 – 7.16 (m, 2H), 7.13 – 7.00 (m, 5H), 6.83 – 6.81 & 6.71 – 6.67 (m, 2H), 4.91 & 4.68 (dd,  $J_1 = 9.4$  Hz,  $J_2 = 1.4$  Hz & dd,  $J_1 = 9.5$  Hz,  $J_2 = 1.6$  Hz, 1H), 3.68 (s, 3H), 2.79 (s, 3H), 2.74 (dd,  $J_1 = 10.1$  Hz,  $J_2 = 4.2$  Hz, 1H), 2.63 – 2.56 (m, 1H), 2.35 (s, 3H), 2.16 (t,  $J = 4.0$  Hz, 1H), 2.08 (s, 3H);  $^{13}\text{C}$  NMR (100 MHz,  $\text{CDCl}_3$ )  $\delta$  158.5, 143.7, 137.0, 136.3, 135.7, 132.4, 129.6, 128.8, 128.2, 128.1, 126.4, 121.5, 113.4, 55.2, 45.8, 37.3, 32.3, 28.7, 21.5, 16.5; HRMS (ESI)  $m/z$   $[\text{M}+\text{H}]^+$ : Calcd for  $\text{C}_{27}\text{H}_{30}\text{NO}_3\text{S}$ : 448.1946. Found: 448.1943.

***N*-4-Dimethyl-*N*-((1*S*,2*R*,3*R*)-2-phenyl-3-(2-(4-(trifluoromethyl)phenyl)prop-1-en-1-yl)cyclopropyl) benzenesulfonamide (3aj):**

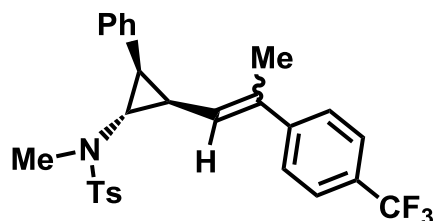

The title compound was prepared according to the general procedure. Purification by column chromatography (TLC  $R_f = 0.3$ ) on silica gel using EtOAc/PE (1:19) as the

eluent the desired product **3aj** as yellow oil in 91% yield (83.4 mg, 0.182 mmol, *E/Z* = 91:9); <sup>1</sup>H NMR (400 MHz, CDCl<sub>3</sub>) δ 7.68 & 7.61 (d, *J* = 8.0 Hz & d, *J* = 7.9 Hz, 2H), 7.47 & 7.41 (d, *J* = 8.2 Hz & d, *J* = 8.0 Hz, 2H), 7.32 – 7.30 (m, 3H), 7.25 – 7.19 (m, 4H), 7.15 – 7.14 (m, 2H), 5.12 & 4.89 (d, *J* = 9.5 Hz & d, *J* = 10.0 Hz, 1H), 2.88 (s, 3H), 2.86 – 2.85 (m, 1H), 2.73 – 2.68 (m, 1H), 2.43 (s, 3H), 2.31 (t, *J* = 4.0 Hz, 1H), 2.21 (s, 3H); <sup>19</sup>F NMR (376 MHz, CDCl<sub>3</sub>) δ -62.2, -62.3; <sup>13</sup>C NMR (100 MHz, CDCl<sub>3</sub>) δ 146.6, 143.9, 136.6, 135.9, 132.4, 129.7, 128.7, 128.5, 128.3, 128.0, 126.7, 125.6, 125.6, 125.1 (q, *J* = 4.0 Hz), 45.7, 37.3, 32.5, 28.8, 21.5, 16.3; HRMS (ESI) *m/z* [M+H]<sup>+</sup>: Calcd for C<sub>27</sub>H<sub>27</sub>NF<sub>3</sub>O<sub>2</sub>S: 486.1715. Found: 486.1712.

***N*-4-Dimethyl-*N*-((1*S*,2*R*,3*R*)-2-(2-(naphthalen-1-yl)prop-1-en-1-yl)-3-phenylcyclopropyl) benzenesulfonamide (**3ak**):**

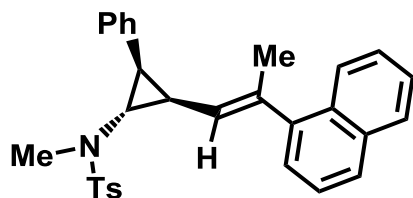

The title compound was prepared according to the general procedure. Purification by column chromatography (TLC *R<sub>f</sub>* = 0.3) on silica gel using EtOAc/PE (1:19) as the eluent the desired product **3ak** as yellow oil in 45% yield (41.9 mg, 0.090 mmol, *E/Z* = 98:2); <sup>1</sup>H NMR (400 MHz, CDCl<sub>3</sub>) δ 7.75 – 7.66 (m, 5H), 7.61 (s, 1H), 7.45 – 7.37 (m, 2H), 7.31 – 7.27 (m, 4H), 7.26 – 7.25 (m, 1H), 7.22 – 7.17 (m, 3H), 5.22 & 4.89 (dd, *J*<sub>1</sub> = 9.5 Hz, *J*<sub>2</sub> = 1.4 Hz & d, *J* = 9.9 Hz, 1H), 2.89 (s, 3H), 2.88 – 2.86 (m, 1H), 2.77 – 2.69 (m, 1H), 2.42 (s, 3H), 2.31 – 2.29 (m, 4H); <sup>13</sup>C NMR (100 MHz, CDCl<sub>3</sub>) δ 143.8, 140.3, 137.5, 136.3, 133.3, 132.5, 132.4, 129.6, 128.8, 128.3, 128.1, 128.0, 127.6, 127.4,

126.6, 126.1, 125.5, 124.0, 124.0, 123.9, 45.9, 37.4, 32.6, 28.9, 21.5, 16.5; HRMS (ESI)  $m/z$   $[M+H]^+$ : Calcd for  $C_{30}H_{30}NO_2S$ : 468.1997. Found: 468.1992.

**(Z)-3-((1R,2S,3R)-2-((N-4-Dimethylphenyl)sulfonamido)-3-phenylcyclopropyl)-2-phenylallyl acetate (3al):**

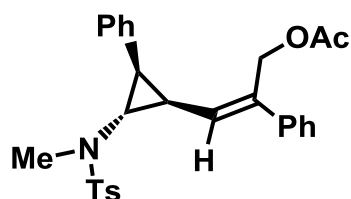

The title compound was prepared according to the general procedure. Purification by column chromatography (TLC  $R_f$  = 0.2) on silica gel using EtOAc/PE (1:19) as the eluent the desired product **3al** as yellow oil in 83% yield (48.9 mg, 0.166 mmol,  $E/Z > 99:1$ );  $^1H$  NMR (400 MHz,  $CDCl_3$ )  $\delta$  7.63 (d,  $J$  = 8.0 Hz, 2H), 7.25 – 7.13 (m, 8H), 7.11 – 7.07 (m, 4H), 5.17 (d,  $J$  = 10.0 Hz, 1H) 5.15 – 5.03 (m, 2H), 2.85 – 2.82 (m, 1H), 2.81 (s, 3H), 2.75 – 2.69 (td,  $J_1$  = 10.1 Hz,  $J_2$  = 3.6 Hz, 1H) 2.36 (s, 3H), 2.28 (t,  $J$  = 4.0 Hz, 1H), 1.95 (s, 3H);  $^{13}C$  NMR (100 MHz,  $CDCl_3$ )  $\delta$  171.2, 144.0, 140.2, 136.6, 135.8, 132.7, 130.2, 129.8, 129.0, 128.5, 128.5, 128.2, 127.4, 127.0, 126.0, 61.6, 45.9, 37.3, 33.0, 28.3, 21.7, 21.1; HRMS (ESI)  $m/z$   $[M+H]^+$ : Calcd for  $C_{28}H_{30}NO_4S$ : 476.1896. Found: 476.1893.

**N-4-Dimethyl-N-((1S,2R,3R)-2-phenyl-3-(2-phenylbut-1-en-1-yl)cyclopropyl)benzenesulfonamide (3am):**



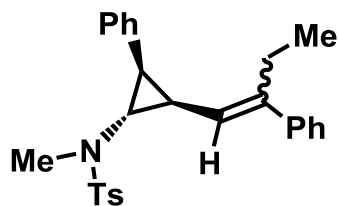

The title compound was prepared according to the general procedure. Purification by column chromatography (TLC  $R_f = 0.3$ ) on silica gel using EtOAc/PE (1:19) as the eluent the desired product **3am** as yellow oil in 96% yield (82.8 mg, 0.192 mmol,  $E/Z = 88:12$ );  $^1\text{H}$  NMR (400 MHz,  $\text{CDCl}_3$ )  $\delta$  7.69 (d,  $J = 8.0$  Hz, 2H), 7.31 – 7.29 (m, 3H), 7.25 – 7.18 (m, 5H), 7.16 – 7.12 (m, 4H), 4.92 & 4.73 (d,  $J = 9.6$  Hz & d,  $J = 9.8$  Hz, 1H), 2.87 (s, 3H), 2.82 (dd,  $J_1 = 10.1$  Hz,  $J_2 = 4.3$  Hz, 1H), 2.74 – 2.59 (m, 4H), 2.42 (s, 3H), 2.26 – 2.24 (t,  $J = 4.0$  Hz, 1H), 1.02 & 0.81 (t,  $J = 7.6$  Hz & t,  $J = 7.4$  Hz, 3H);  $^{13}\text{C}$  NMR (100 MHz,  $\text{CDCl}_3$ )  $\delta$  144.4, 143.7, 142.1, 136.2, 132.3, 129.6, 128.7, 128.1, 128.1, 128.0, 126.6, 126.5, 126.0, 122.9, 45.8, 37.3, 32.4, 28.3, 23.4, 21.5, 13.5; HRMS (ESI)  $m/z$   $[\text{M}+\text{H}]^+$ : Calcd for  $\text{C}_{27}\text{H}_{30}\text{NO}_2\text{S}$ : 432.1997. Found: 432.1992.

***N*-4-Dimethyl-*N*-((1*S*,2*R*,3*R*)-2-(3-methyl-2-phenylbut-1-en-1-yl)-3-phenylcyclopropyl) benzenesulfonamide (**3an**):**

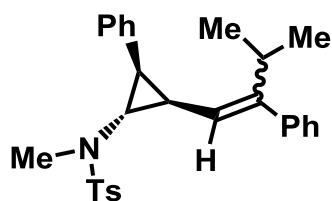

The title compound was prepared according to the general procedure. Purification by column chromatography (TLC  $R_f = 0.2$ ) on silica gel using EtOAc/PE (1:19) as the eluent the desired product **3an** as yellow oil in 81% yield (72.1 mg, 0.162 mmol,  $E/Z = 55:45$ );  $^1\text{H}$  NMR (400 MHz,  $\text{CDCl}_3$ )  $\delta$  7.70 & 7.66 (d,  $J = 8.3$  Hz & d,  $J = 8.2$  Hz, 2H),

7.36 – 7.27 (m, 4H), 7.25 – 7.10 (m, 7H), 6.97 – 6.95 (m, 1H), 4.68 & 4.61 (dd,  $J_1 = 9.8$  Hz,  $J_2 = 1.1$  Hz & d,  $J = 8.8$  Hz, 1H), 3.21 – 3.14 & 2.74 – 2.68 (m, 1H), 2.86 & 2.66 (s, 3H), 2.80 – 2.76 & 2.63 – 2.60 (m, 1H), 2.47 – 2.45 & 2.42 – 2.38 & 2.07 – 2.01 (m, 1H), 2.44 & 2.43 (s, 3H), 2.25 & 2.19 (t,  $J = 4.0$  Hz, 1H), 1.14 & 0.81 (d,  $J = 7.0$  Hz & d,  $J = 6.8$  Hz, 3H), 0.89 & 0.87 (d,  $J = 5.3$  Hz & d,  $J = 5.2$  Hz, 3H);  $^{13}\text{C}$  NMR (100 MHz,  $\text{CDCl}_3$ )  $\delta$  150.3, 150.3, 143.7, 143.6, 142.5, 140.7, 136.6, 136.3, 132.9, 132.4, 129.6, 129.5, 128.8, 128.8, 128.7, 128.4, 128.1, 128.1, 128.0, 127.4, 126.6, 126.4, 126.3, 126.3, 123.6, 120.1, 46.0, 45.7, 37.3, 36.9, 35.8, 32.7, 32.4, 30.0, 27.8, 27.6, 21.8, 21.7, 21.5, 21.4; HRMS (ESI)  $m/z$   $[\text{M}+\text{H}]^+$ : Calcd for  $\text{C}_{28}\text{H}_{32}\text{NO}_2\text{S}$ : 446.2154. Found: 446.2157.

***N*-((1*S*,2*R*,3*R*)-2-(2-Cyclopentyl-2-phenylvinyl)-3-phenylcyclopropyl)-*N*-4-dimethylbenzenesulfonamide (**3ao**):**

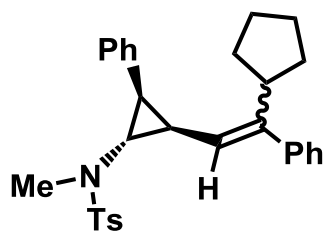

The title compound was prepared according to the general procedure. Purification by column chromatography (TLC  $R_f = 0.3$ ) on silica gel using EtOAc/PE (1:19) as the eluent the desired product **3ao** as yellow oil in 55% yield (51.8 mg, 0.110 mmol,  $E/Z = 85:15$ );  $^1\text{H}$  NMR (400 MHz,  $\text{CDCl}_3$ )  $\delta$  7.69 & 7.64 (d,  $J = 8.2$  Hz & d,  $J = 8.0$  Hz, 2H), 7.35 – 7.27 (m, 6H), 7.23 – 7.11 & 6.95 – 6.93 (m, 6H), 4.71 & 4.65 (dd,  $J_1 = 9.8$  Hz,  $J_2 = 1.3$  Hz & d,  $J = 8.7$  Hz, 1H), 3.21 – 3.12 & 2.58 – 2.50 (m, 1H), 2.85 & 2.64 (s,

3H), 2.78 – 2.68 & 2.62 – 2.60 (m, 1H), 2.43 & 2.42 (s, 3H), 2.25 & 2.18 (t,  $J = 4.0$  Hz & t,  $J = 4.0$  Hz, 1H), 2.05 – 1.99 & 1.92 – 1.90 (m, 1H), 1.57 – 1.40 & 1.27 – 1.08 (m, 8H), 1.56 – 1.40 (m, 6H), 1.27 – 1.08 (m, 2H);  $^{13}\text{C}$  NMR (100 MHz,  $\text{CDCl}_3$ )  $\delta$  147.4, 143.6, 141.1, 136.7, 132.9, 129.5, 128.8, 128.7, 128.1, 128.1, 128.0, 126.6, 126.3, 120.5, 48.1, 45.7, 36.8, 32.8, 31.5, 31.2, 27.7, 24.3, 24.2, 21.6. HRMS (ESI)  $m/z$   $[\text{M}+\text{H}]^+$ : Calcd for  $\text{C}_{30}\text{H}_{34}\text{NO}_2\text{S}$ : 472.2310. Found: 472.2313.

***N*-4-Dimethyl-*N*-((1*S*,2*R*,3*R*)-2-(2-methylundec-1-en-1-yl)-3-phenylcyclopropyl)benzenesulfonamide (**3ap**):**

**benzenesulfonamide (**3ap**):**

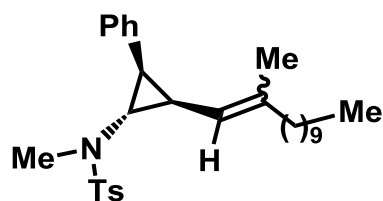

The title compound was prepared according to the general procedure. Purification by column chromatography (TLC  $R_f = 0.3$ ) on silica gel using EtOAc/PE (1:19) as the eluent the desired product **3ap** as yellow oil in 56% yield (52.3 mg, 0.112 mmol,  $E/Z = 54:46$ );  $^1\text{H}$  NMR (400 MHz,  $\text{CDCl}_3$ )  $\delta$  7.66 (d,  $J = 7.9$  Hz, 2H), 7.30 (d,  $J = 7.8$  Hz, 2H), 7.25 – 7.15 (m, 3H), 7.10 – 7.08 (m, 2H), 4.46 (d,  $J = 9.2$  Hz, 1H), 2.83 & 2.81 (s, 3H), 2.71 – 2.65 (m, 1H), 2.51 – 2.45 (m, 1H), 2.43 (s, 3H), 2.13 – 2.08 (m, 2H), 1.88 – 1.84 (t,  $J = 7.4$  Hz, 1H), 1.72 & 1.57 (s, 3H), 1.30 – 1.19 (m, 16H), 0.90 – 0.86 (m, 3H);  $^{13}\text{C}$  NMR (100 MHz,  $\text{CDCl}_3$ )  $\delta$  143.7, 134.7 139.7, 139.6, 136.8, 136.8, 132.8, 132.7, 129.7, 128.9, 128.8, 128.2, 128.2, 128.1, 126.3, 126.3, 119.7, 119.3, 45.6, 45.6, 39.6, 37.4, 37.3, 32.6, 32.3, 32.0, 32.0, 31.9, 29.8, 29.8, 29.7, 29.7, 29.6, 29.5, 29.2,

28.1, 27.9, 27.8, 23.5, 22.8, 22.8, 21.7, 16.8, 14.2; HRMS (ESI)  $m/z$   $[M+H]^+$ : Calcd for  $C_{30}H_{44}NO_2S$ : 482.3093. Found: 482.3101.

***N*-((1*S*,2*R*,3*R*)-2-(2,2-Diphenylvinyl)-3-phenylcyclopropyl)-*N*-4-dimethylbenzenesulfonamide (**3aq**):**

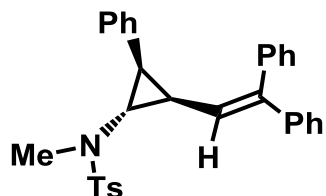

The title compound was prepared according to the general procedure. Purification by column chromatography (TLC  $R_f$  = 0.3) on silica gel using EtOAc/PE (1:19) as the eluent the desired product **3aq** as yellow oil in 85% yield (81.5 mg, 0.170 mmol);  $^1H$  NMR (400 MHz,  $CDCl_3$ )  $\delta$  7.69 (d,  $J$  = 8.2 Hz, 2H), 7.42 – 7.39 (m, 2H), 7.36 – 7.27 (m, 7H), 7.24 – 7.22 (m, 3H), 7.17 – 7.15 (m, 3H), 6.98 – 6.95 (m, 2H), 5.31 (d,  $J$  = 10.2 Hz, 1H), 2.78 – 2.75 (m, 1H), 2.74 (s, 3H), 2.46 – 2.44 (t,  $J$  = 4.0 Hz, 1H), 2.44 (s, 3H), 2.41 – 2.35 (td,  $J_1$  = 10.2 Hz,  $J_2$  = 3.6 Hz, 1H);  $^{13}C$  NMR (100 MHz,  $CDCl_3$ )  $\delta$  143.8, 142.1, 139.6, 136.2, 132.7, 130.0, 129.6, 128.9, 128.4, 128.3, 128.0, 128.0, 127.3, 127.1, 127.0, 126.6, 125.1, 46.1, 37.0, 33.4, 29.1, 21.6; HRMS (ESI)  $m/z$   $[M+H]^+$ : Calcd for  $C_{31}H_{30}NO_2S$ : 480.1997. Found: 480.2000.

***N*-((1*S*,2*R*,3*R*)-2-(2,2-Dicyclohexylvinyl)-3-phenylcyclopropyl)-*N*-4-dimethylbenzenesulfonamide (**3ar**):**

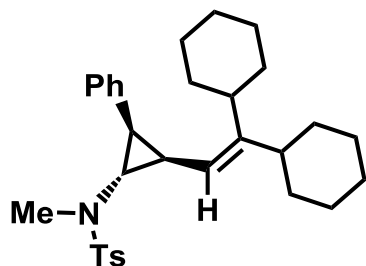

The title compound was prepared according to the general procedure. Purification by column chromatography (TLC  $R_f = 0.3$ ) on silica gel using EtOAc/PE (1:19) as the eluent the desired product **3ar** as yellow oil in 71% yield (69.7 mg, 0.142 mmol);  $^1\text{H}$  NMR (400 MHz,  $\text{CDCl}_3$ )  $\delta$  7.67 (dd,  $J_1 = 8.2$  Hz,  $J_2 = 1.7$  Hz, 2H), 7.30 – 7.14 (m, 5H), 7.07 – 7.05 (m, 2H), 4.42 (dd,  $J_1 = 8.5$  Hz,  $J_2 = 1.5$  Hz, 1H), 2.84 (s, 3H), 2.67 (dd,  $J_1 = 10.1$  Hz,  $J_2 = 4.0$  Hz, 1H), 2.57 – 2.51 (m, 1H), 2.44 (s, 3H), 2.02 (t,  $J = 4.0$ , 1H), 1.78 – 1.56 (m, 10H), 1.37 – 1.14 (m, 10H), 1.05 – 0.92 (m, 1H), 0.80 – 0.71 (m, 1H).;  $^{13}\text{C}$  NMR (100 MHz,  $\text{CDCl}_3$ )  $\delta$  154.3, 143.6, 136.7, 132.5, 129.5, 128.8, 128.2, 127.8, 126.1, 117.2, 46.4, 41.4, 40.1, 37.3, 35.0, 34.6, 32.2, 30.8, 30.5, 27.1, 27.1, 27.0, 26.6, 26.5, 26.1, 26.1, 21.5; HRMS (ESI)  $m/z$   $[\text{M}+\text{H}]^+$ : Calcd for  $\text{C}_{31}\text{H}_{42}\text{NO}_2\text{S}$ : 492.2936. Found: 492.2940.

***N*-((1*S*,2*R*,3*R*)-2-(Cyclododecylidenemethyl)-3-phenylcyclopropyl)-*N*-4-dimethylbenzenesulfonamide (3as):**

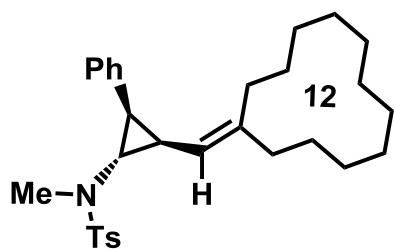

The title compound was prepared according to the general procedure. Purification by column chromatography (TLC  $R_f = 0.2$ ) on silica gel using EtOAc/PE (1:19) as the

eluent the desired product **3as** as yellow oil in 62% yield (59.4 mg, 0.124 mmol);  $^1\text{H}$  NMR (400 MHz,  $\text{CDCl}_3$ )  $\delta$  7.66 (d,  $J = 8.2$  Hz, 2H), 7.30 (d,  $J = 8.0$  Hz, 2H), 7.23 – 7.19 (m, 2H), 7.16 – 7.12 (m, 1H), 7.08 – 7.06 (m, 2H), 4.52 (d,  $J = 9.6$  Hz, 1H), 2.81 (s, 3H), 2.70 (dd,  $J_1 = 10.2$  Hz,  $J_2 = 4.2$  Hz, 1H), 2.51 (td,  $J_1 = 10.0$  Hz,  $J_2 = 3.8$  Hz, 1H), 2.43 (s, 3H), 2.30 (dt,  $J_1 = 14.2$  Hz,  $J_2 = 6.9$  Hz, 1H), 2.17 (t,  $J = 4.0$  Hz, 1H), 2.06 – 1.87 (m, 3H), 1.42 – 1.15 (m, 15H), 1.03 – 0.91 (m, 3H);  $^{13}\text{C}$  NMR (100 MHz,  $\text{CDCl}_3$ )  $\delta$  143.6, 141.1, 132.6, 129.5, 128.6, 128.2, 128.0, 126.1, 120.2, 45.6, 37.2, 32.4, 31.4, 29.6, 28.1, 25.3, 24.9, 24.0, 24.0, 24.0, 23.2, 23.1, 23.0, 22.2, 21.6; HRMS (ESI)  $m/z$   $[\text{M}+\text{H}]^+$ : Calcd for  $\text{C}_{30}\text{H}_{42}\text{NO}_2\text{S}$ : 480.2936. Found: 480.2945.

***N*-((1*S*,2*R*,3*R*)-2-((*E*)-((1*R*,3*S*,5*S*)-Adamantan-2-ylidene)methyl)-3-phenylcyclopropyl)-*N*-4-dimethylbenzenesulfonamide (**3at**):**

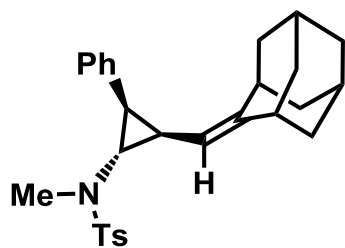

The title compound was prepared according to the general procedure. Purification by column chromatography (TLC  $R_f = 0.3$ ) on silica gel using EtOAc/PE (1:19) as the eluent the desired product **3at** as yellow oil in 64% yield (57.2 mg, 0.128 mmol);  $^1\text{H}$  NMR (400 MHz,  $\text{CDCl}_3$ )  $\delta$  7.69 – 7.67 (m, 2H), 7.30 (d,  $J = 8.0$  Hz, 2H), 7.25 – 7.21 (m, 2H), 7.18 – 7.14 (m, 1H), 7.09 – 7.06 (m, 2H), 4.41 (d,  $J = 8.5$  Hz, 1H), 2.98 – 2.93 (s, 1H), 2.80 (s, 3H), 2.61 (dd,  $J_1 = 10.2$  Hz,  $J_2 = 4.2$  Hz, 1H), 2.52 – 2.47 (m, 1H), 2.43 (s, 3H), 2.18 (s, 1H), 2.04 (t,  $J = 4.0$  Hz, 1H), 1.92 – 1.87 (m, 2H), 1.83 – 1.70 (m, 8H),

1.53 (d,  $J = 12.1$  Hz, 1H), 1.35 (d,  $J = 12.0$  Hz, 1H);  $^{13}\text{C}$  NMR (100 MHz,  $\text{CDCl}_3$ )  $\delta$   
151.8, 143.6, 136.8, 132.5, 129.5, 128.7, 128.1, 127.9, 126.1, 110.7, 45.6, 40.2, 39.9,  
39.5, 38.8, 38.5, 37.2, 37.1, 32.8, 31.9, 28.4, 28.3, 27.0, 21.5; HRMS (ESI)  $m/z$   $[\text{M}+\text{H}]^+$ :  
Calcd for  $\text{C}_{28}\text{H}_{34}\text{NO}_2\text{S}$ : 448.2310. Found: 448.2304.

**General procedure for the synthesis of the 1,3-dienyl aldehydes:**

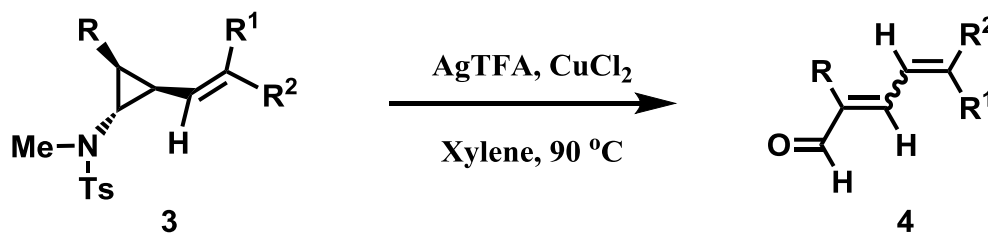

To an Schlenk tube was added the vinyl cyclopropylamide **3** (0.20 mmol, 1.0 equiv.), AgTFA (2.2 mg, 0.01 mmol, 5 mol%), CuCl<sub>2</sub> (53,8 mg, 0.40 mmol, 2.0 equiv.) and Xylene (4.0 mL, 0.05 M). The tube was sealed under air and heated to 90 °C overnight. After completion of the reaction as monitored by TLC, the crude mixture was cooled to room temperature. The mixture was then passed through celite, washed with ethyl acetate and concentrated in vacuum. The residue was then purified by using silica gel column chromatography using PE/EtOAc (19:1) as the eluent to afford the 1,3-dienyl aldehyde **4**.

When the reaction was scaled up to 1.2 mmol, the Schlenk tube was replaced by Schlenk flask. An oven dried Schlenk tube was charged with **3aa** (502 mg, 1.20 mmol, 1.0 equiv.), CuCl<sub>2</sub> (322.7 mg, 2.40 mmol, 2.0 equiv.) and AgTFA (13.3 mg, 0.06 mmol, 5 mol%) in xylene (0.05 M, 24 mL). The reaction mixture was then reacted at 90 °C without inert gas protection until the cyclopropane **3aa** was consumed completely. Then the resulting reaction mixture was diluted with ethyl acetate, washed with water and brine. The organic layer was dried over anhydrous Na<sub>2</sub>SO<sub>4</sub>, filtered, and concentrated to give the crude product, which was purified through a flash column chromatography (eluent: 5 % ethyl acetate in petroleum solution) to afford **4a** (208.3 mg, 0.839 mmol, *E/Z* = 79:21, 70% yield).



**2,5-Diphenylhexa-2,4-dienal (4a):**

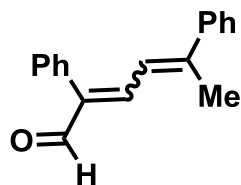

The title compound was prepared according to the general procedure. Purification by column chromatography (TLC  $R_{f(E)} = 0.3$ ,  $R_{f(Z)} = 0.4$ ) on silica gel using EtOAc/PE (1:19) as the eluent the desired product **4a** as yellow oil in 85% yield (42.1 mg, 0.170 mmol,  $E/Z = 81:19$ );

**(2E,4E)-2,5-Diphenylhexa-2,4-dienal (major of 4a):**  $^1\text{H}$  NMR (400 MHz,  $\text{CDCl}_3$ )  $\delta$  9.74 (s, 1H), 7.52 (d,  $J = 11.8$  Hz, 1H), 7.45 – 7.38 (m, 4H), 7.38 – 7.30 (m, 4H), 7.29 – 7.26 (m, 2H), 6.83 (dd,  $J_1 = 11.9$  Hz,  $J_2 = 1.3$  Hz, 1H), 2.42 (d,  $J = 1.3$  Hz, 3H);  $^{13}\text{C}$  NMR (100 MHz,  $\text{CDCl}_3$ )  $\delta$  193.4, 148.0, 145.2, 141.8, 141.2, 132.7, 130.0, 128.7, 128.5, 128.3, 128.1, 126.2, 122.9, 29.7, 16.9. HRMS (ESI)  $m/z$   $[\text{M}+\text{H}]^+$ : Calcd for  $\text{C}_{18}\text{H}_{17}\text{O}$ : 249.1279. Found: 249.1269.

**(2E,4Z)-2,5-Diphenylhexa-2,4-dienal (minor of 4a):**  $^1\text{H}$  NMR (400 MHz,  $\text{CDCl}_3$ )  $\delta$  9.47 (s, 1H), 7.46 – 7.35 (m, 6H), 7.32 – 7.26 (m, 4H), 7.11 (d,  $J = 11.7$  Hz, 1H), 6.50 (dd,  $J_1 = 11.7$  Hz,  $J_2 = 1.5$  Hz, 1H), 2.21 (s, 3H);  $^{13}\text{C}$  NMR (100 MHz,  $\text{CDCl}_3$ )  $\delta$  193.6, 151.8, 147.6, 140.4, 140.1, 132.8, 129.9, 128.5, 128.4, 128.2, 128.2, 128.0, 123.5, 26.4. HRMS (ESI)  $m/z$   $[\text{M}+\text{H}]^+$ : Calcd for  $\text{C}_{18}\text{H}_{17}\text{O}$ : 249.1279. Found: 249.1275.

**2-([1,1'-Biphenyl]-4-yl)-5-phenylhexa-2,4-dienal (4b):**

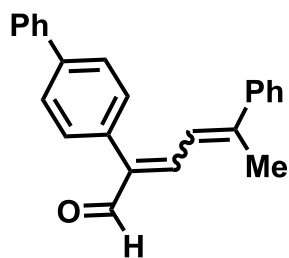

The title compound was prepared according to the general procedure. Purification by column chromatography (TLC  $R_{f(E)} = 0.2$ ,  $R_{f(Z)} = 0.4$ ) on silica gel using EtOAc/PE (1:19) as the eluent the desired product **4b** as yellow oil in 81% yield (52.4 mg, 0.162 mmol,  $E/Z = 76:24$ );

**(2E,4E)-2-([1,1'-Biphenyl]-4-yl)-5-phenylhexa-2,4-dienal (major of 4b):**  $^1\text{H}$  NMR (400 MHz,  $\text{CDCl}_3$ )  $\delta$  9.78 (s, 1H), 7.66 – 7.62 (m, 4H), 7.55 (d,  $J = 11.9$  Hz, 1H), 7.47 – 7.43 (m, 4H), 7.38 – 7.32 (m, 6H), 6.92 (dd,  $J_1 = 11.8$  Hz,  $J_2 = 1.3$  Hz, 1H), 2.44 (s, 3H);  $^{13}\text{C}$  NMR (100 MHz,  $\text{CDCl}_3$ )  $\delta$  193.5, 148.3, 145.7, 141.9, 141.0, 140.9, 140.8, 131.7, 130.6, 128.9, 128.7, 127.6, 127.3, 127.2, 126.3, 123.0, 17.1; HRMS (ESI)  $m/z$   $[\text{M}+\text{H}]^+$ : Calcd for  $\text{C}_{24}\text{H}_{21}\text{O}$ : 325.1592. Found: 325.1586.

**(2E,4Z)-2-([1,1'-Biphenyl]-4-yl)-5-phenylhexa-2,4-dienal (minor of 4b):**  $^1\text{H}$  NMR (400 MHz,  $\text{CDCl}_3$ )  $\delta$  9.78 (s, 1H), 7.68 – 7.60 (m, 4H), 7.55 (d,  $J = 11.9$  Hz, 1H), 7.47 – 7.42 (m, 4H), 7.39 – 7.32 (m, 5H), 6.92 (dd,  $J_1 = 11.9$  Hz,  $J_2 = 1.3$  Hz, 1H), 2.44 (d,  $J = 1.3$  Hz, 3H);  $^{13}\text{C}$  NMR (100 MHz,  $\text{CDCl}_3$ )  $\delta$  193.5, 148.2, 145.5, 141.8, 140.9, 140.7, 140.7, 131.6, 130.4, 128.8, 128.5, 127.4, 127.1, 127.0, 126.2, 122.9, 16.9; HRMS (ESI)  $m/z$   $[\text{M}+\text{H}]^+$ : Calcd for  $\text{C}_{24}\text{H}_{21}\text{O}$ : 325.1592. Found: 325.1584.

**5-Phenyl-2-(4-(trifluoromethyl)phenyl)hexa-2,4-dienal (4c):**

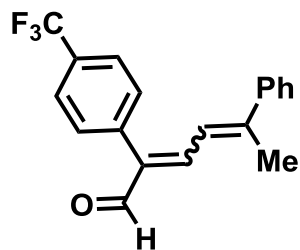

The title compound was prepared according to the general procedure. Purification by column chromatography (TLC  $R_{f(E)} = 0.2$ ,  $R_{f(Z)} = 0.4$ ) on silica gel using EtOAc/PE (1:19) as the eluent the desired product **4c** as yellow oil in 67 % yield (42.3 mg, 0.134 mmol,  $E/Z = 80:20$ );

**(2E,4E)-5-Phenyl-2-(4-(trifluoromethyl)phenyl)hexa-2,4-dienal (major of 4c):**  $^1\text{H}$  NMR (400 MHz,  $\text{CDCl}_3$ )  $\delta$  9.74 (s, 1H), 7.69 (d,  $J = 8.0$  Hz, 2H), 7.60 (d,  $J = 11.9$  Hz, 1H), 7.44 – 7.34 (m, 7H), 6.77 (dd,  $J_1 = 12.0$  Hz,  $J_2 = 1.3$  Hz, 1H), 2.44 (s, 3H);  $^{19}\text{F}$  NMR (376 MHz,  $\text{CDCl}_3$ )  $\delta$  -62.52;  $^{13}\text{C}$  NMR (100 MHz,  $\text{CDCl}_3$ )  $\delta$  192.7, 149.6, 146.2, 141.6, 139.8, 136.5, 130.4, 130.0, 129.1, 128.6, 127.0, 126.2, 125.3 (d,  $J = 3.8$  Hz), 122.1, 17.0; HRMS (ESI)  $m/z$   $[\text{M}+\text{H}]^+$ : Calcd for  $\text{C}_{19}\text{H}_{16}\text{OF}_3$ : 317.1153. Found: 317.1143.

**(2E,4Z)-5-Phenyl-2-(4-(trifluoromethyl)phenyl)hexa-2,4-dienal (minor of 4c):**  $^1\text{H}$  NMR (400 MHz,  $\text{CDCl}_3$ )  $\delta$  9.47 (s, 1H), 7.70 (d,  $J = 8.9$  Hz, 2H), 7.47 – 7.39 (m, 5H), 7.32 – 7.30 (m, 2H), 7.17 (d,  $J = 11.8$  Hz, 1H), 6.44 (dd,  $J_1 = 11.7$  Hz,  $J_2 = 1.4$  Hz, 1H), 2.23 (s, 3H);  $^{19}\text{F}$  NMR (376 MHz,  $\text{CDCl}_3$ )  $\delta$  -62.5;  $^{13}\text{C}$  NMR (100 MHz,  $\text{CDCl}_3$ )  $\delta$  192.9, 153.4, 148.4, 139.9, 139.0, 136.6, 130.3, 128.7, 128.6, 128.2, 125.2, 125.2, 125.1, 122.9, 26.5; HRMS (ESI)  $m/z$   $[\text{M}+\text{H}]^+$ : Calcd for  $\text{C}_{19}\text{H}_{16}\text{OF}_3$ : 317.1153. Found: 317.1143.

**2-(4-Bromophenyl)-5-phenylhexa-2,4-dienal (4d):**

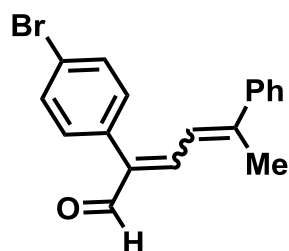

The title compound was prepared according to the general procedure. Purification by column chromatography (TLC  $R_{f(E)} = 0.2$ ,  $R_{f(Z)} = 0.4$ ) on silica gel using EtOAc/PE (1:19) as the eluent the desired product **4d** as yellow oil in 76% yield (49.1 mg, 0.152 mmol,  $E/Z = 78:22$ );

**(2E,4E)-2-(4-Bromophenyl)-5-phenylhexa-2,4-dienal (major of 4d):**  $^1\text{H}$  NMR (400 MHz,  $\text{CDCl}_3$ )  $\delta$  9.71 (s, 1H), 7.66 – 7.51 (m, 3H), 7.43 – 7.40 (m, 2H), 7.35 – 7.33 (m, 3H), 7.15 (d,  $J = 8.4$  Hz, 2H), 6.78 (dd,  $J_1 = 11.9$  Hz,  $J_2 = 1.4$  Hz, 1H), 2.42 (s, 3H);  $^{13}\text{C}$  NMR (100 MHz,  $\text{CDCl}_3$ )  $\delta$  192.9, 148.8, 145.7, 141.6, 140.0, 131.7, 131.6, 131.5, 129.0, 128.6, 126.1, 122.4, 122.4, 16.9; HRMS (ESI)  $m/z$   $[\text{M}+\text{H}]^+$ : Calcd for  $\text{C}_{18}\text{H}_{16}\text{OBr}$ : 327.0385. Found: 327.0379.

**(2E,4Z)-2-(4-Bromophenyl)-5-phenylhexa-2,4-dienal (minor of 4d):**  $^1\text{H}$  NMR (400 MHz,  $\text{CDCl}_3$ )  $\delta$  9.44 (s, 1H), 7.57 – 7.55 (m, 2H), 7.46 – 7.39 (m, 3H), 7.31 – 7.28 (m, 2H), 7.16 – 7.14 (m, 2H), 7.11 (d,  $J = 11.7$  Hz, 1H), 6.45 (dd,  $J_1 = 11.7$  Hz,  $J_2 = 1.4$  Hz, 1H), 2.22 (s, 3H);  $^{13}\text{C}$  NMR (100 MHz,  $\text{CDCl}_3$ )  $\delta$  193.1, 152.6, 147.8, 140.0, 139.2, 131.7, 131.6, 131.5, 128.6, 128.6, 128.2, 123.2, 122.3, 26.5; HRMS (ESI)  $m/z$   $[\text{M}+\text{H}]^+$ : Calcd for  $\text{C}_{18}\text{H}_{16}\text{OBr}$ : 327.0385. Found: 327.0378.

**2-(3-Phenylbut-2-en-1-ylidene)pentadecanal (4e):**

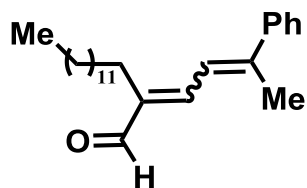

The title compound was prepared according to the general procedure. Purification by column chromatography (TLC  $R_{f(E)} = 0.3$ ,  $R_{f(Z)} = 0.4$ ) on silica gel using EtOAc/PE (1:19) as the eluent the desired product **4e** as yellow oil in 69% yield (48.8 mg, 0.138 mmol,  $E/Z = 78:22$ );

**(2E,4E)-2-(3-phenylbut-2-en-1-ylidene)pentadecanal (major of 4e):**  $^1\text{H}$  NMR (400 MHz,  $\text{CDCl}_3$ )  $\delta$  9.50 (s, 1H), 7.52 (d,  $J = 7.5$  Hz, 2H), 7.42 – 7.33 (m, 3H), 7.24 (d,  $J = 10.4$  Hz, 1H), 6.88 (d,  $J = 11.8$  Hz, 1H), 2.41 (t,  $J = 7.7$  Hz, 2H), 2.35 (s, 3H), 1.42 – 1.19 (m, 24H), 0.86 (t,  $J = 6.7$  Hz, 3H);  $^{13}\text{C}$  NMR (100 MHz,  $\text{CDCl}_3$ )  $\delta$  195.0, 146.4, 144.7, 142.6, 142.3, 128.6, 128.6, 126.1, 121.9, 31.9, 29.7, 29.7, 29.6, 29.6, 29.4, 29.4, 29.2, 24.1, 22.7, 16.7, 14.1; HRMS (ESI)  $m/z$   $[\text{M}+\text{H}]^+$ : Calcd for  $\text{C}_{25}\text{H}_{39}\text{O}$ : 355.3001. Found: 355.2994.

**(2E,4Z)-2-(3-Phenylbut-2-en-1-ylidene)pentadecanal (minor of 4e):**  $^1\text{H}$  NMR (400 MHz,  $\text{CDCl}_3$ )  $\delta$  9.50 (s, 1H), 7.43 – 7.35 (m, 3H), 7.26 – 7.24 (s, 1H), 6.84 (d,  $J = 11.8$  Hz, 1H), 6.59 (d,  $J = 11.7$  Hz, 1H) 2.37 – 2.33 (m, 2H), 2.29 (s, 3H), 1.32 – 1.25 (m, 26H), 0.88 – 0.85 (m, 3H);  $^{13}\text{C}$  NMR (100 MHz,  $\text{CDCl}_3$ )  $\delta$  195.2, 149.7, 146.4, 141.5, 140.2, 128.4, 128.2, 128.1, 122.5, 31.9, 29.7, 29.6, 29.6, 29.5, 29.4, 29.2, 26.6, 24.1, 22.7, 14.1; HRMS (ESI)  $m/z$   $[\text{M}+\text{H}]^+$ : Calcd for  $\text{C}_{25}\text{H}_{39}\text{O}$ : 355.3001. Found: 355.2998.

**2-Phenyl-5-(p-tolyl)hexa-2,4-dienal (4f):**

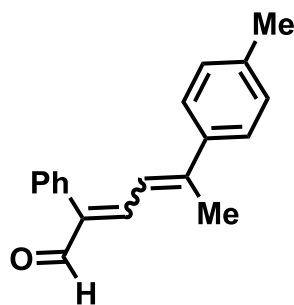

The title compound was prepared according to the general procedure. Purification by column chromatography (TLC  $R_{f(E)} = 0.3$ ,  $R_{f(Z)} = 0.4$ ) on silica gel using EtOAc/PE (1:19) as the eluent the desired product **4f** as yellow oil in 75% yield (39.2 mg, 0.150 mmol,  $E/Z = 77:23$ );

**(2E,4E)-2-Phenyl-5-(p-tolyl)hexa-2,4-dienal (major of 4f):**  $^1\text{H}$  NMR (400 MHz,  $\text{CDCl}_3$ )  $\delta$  9.73 (s, 1H), 7.51 (d,  $J = 11.9$  Hz, 1H), 7.43 – 7.26 (m, 7H), 7.13 (d,  $J = 8.0$  Hz, 2H), 6.82 (dd,  $J_1 = 11.9$  Hz,  $J_2 = 1.3$  Hz, 1H), 2.40 (s, 3H), 2.33 (s, 1H);  $^{13}\text{C}$  NMR (100 MHz,  $\text{CDCl}_3$ )  $\delta$  193.6, 148.2, 145.7, 140.9, 139.1, 139.0, 132.9, 130.1, 129.4, 128.4, 128.2, 126.2, 122.2, 21.3, 16.9; HRMS (ESI)  $m/z$   $[\text{M}+\text{H}]^+$ : Calcd for  $\text{C}_{19}\text{H}_{19}\text{O}$ : 263.1436. Found: 263.1433.

**(2E,4Z)-2-Phenyl-5-(p-tolyl)hexa-2,4-dienal (minor of 4f):**  $^1\text{H}$  NMR (400 MHz,  $\text{CDCl}_3$ )  $\delta$  9.48 (s, 1H), 7.45 – 7.41 (m, 2H), 7.38 – 7.36 (m, 1H), 7.29 – 7.26 (m, 2H), 7.24 – 7.20 (m, 4H), 7.14 (d,  $J = 11.8$  Hz, 1H), 6.47 (dd,  $J_1 = 11.7$  Hz,  $J_2 = 1.4$  Hz, 1H), 2.41 (s, 3H), 2.19 (s, 3H);  $^{13}\text{C}$  NMR (100 MHz,  $\text{CDCl}_3$ )  $\delta$  193.4, 148.0, 145.5, 140.9, 139.0, 132.9, 130.0, 129.2, 128.3, 128.1, 126.1, 122.1, 21.2, 16.8; HRMS (ESI)  $m/z$   $[\text{M}+\text{H}]^+$ : Calcd for  $\text{C}_{19}\text{H}_{19}\text{O}$ : 263.1436. Found: 263.1429.

**2-Phenyl-5-(4-(trifluoromethyl)phenyl)hexa-2,4-dienal (4g):**

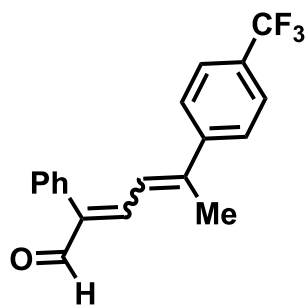

The title compound was prepared according to the general procedure. Purification by column chromatography (TLC  $R_{f(E)} = 0.2$ ,  $R_{f(Z)} = 0.3$ ) on silica gel using EtOAc/PE (1:19) as the eluent the desired product **4g** as yellow oil in 80% yield (49.9 mg, 0.160 mmol,  $E/Z = 80:20$ );

**(2E,4E)-2-Phenyl-5-(4-(trifluoromethyl)phenyl)hexa-2,4-dienal (major of 4g):**  $^1\text{H}$  NMR (400 MHz,  $\text{CDCl}_3$ )  $\delta$  9.77 (s, 1H), 7.58 – 7.56 (m, 2H), 7.52 – 7.48 (m, 3H), 7.45 – 7.38 (m, 3H), 7.28 – 7.25 (m, 2H), 6.84 (d,  $J = 11.6$  Hz, 1H), 2.43 (s, 3H);  $^{19}\text{F}$  NMR (376 MHz,  $\text{CDCl}_3$ )  $\delta$  -62.5;  $^{13}\text{C}$  NMR (100 MHz,  $\text{CDCl}_3$ )  $\delta$  193.5, 146.2, 145.4, 144.3, 142.3, 132.5, 130.1, 128.5, 128.5, 126.5, 125.6 (q,  $J = 4.2$  Hz), 125.6, 125.4, 124.6, 17.0; HRMS (ESI)  $m/z$   $[\text{M}+\text{H}]^+$ : Calcd for  $\text{C}_{19}\text{H}_{16}\text{OF}_3$ : 317.1153. Found: 317.1148.

**(2E,4Z)-2-Phenyl-5-(4-(trifluoromethyl)phenyl)hexa-2,4-dienal (minor of 4g):**  $^1\text{H}$  NMR (400 MHz,  $\text{CDCl}_3$ )  $\delta$  9.50 (s, 1H), 7.72 – 7.69 (m, 2H), 7.47 – 7.38 (m, 5H), 7.28 – 7.25 (m, 2H), 6.99 (d,  $J = 11.7$  Hz, 1H), 6.55 (dd,  $J_1 = 11.7$  Hz,  $J_2 = 1.3$  Hz, 1H), 2.21 (s, 3H);  $^{19}\text{F}$  NMR (376 MHz,  $\text{CDCl}_3$ )  $\delta$  -62.5;  $^{13}\text{C}$  NMR (100 MHz,  $\text{CDCl}_3$ )  $\delta$  192.7, 149.6, 146.3, 141.5, 130.4, 129.1, 128.6, 126.2, 125.3 (q,  $J = 4.0$  Hz), 122.1, 17.0; HRMS (ESI)  $m/z$   $[\text{M}+\text{H}]^+$ : Calcd for  $\text{C}_{19}\text{H}_{16}\text{OF}_3$ : 317.1153. Found: 317.1157.

**(E)-2,5,5-Triphenylpenta-2,4-dienal (4h):**

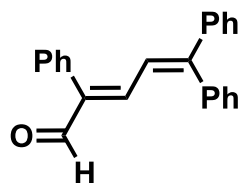

The title compound was prepared according to the general procedure. Purification by column chromatography (TLC  $R_f = 0.2$ ) on silica gel using EtOAc/PE (1:19) as the eluent the desired product **4h** as yellow oil in 74% yield (56.1 mg, 0.148 mmol);  $^1\text{H}$  NMR (400 MHz,  $\text{CDCl}_3$ )  $\delta$  9.52 (s, 1H), 7.51 – 7.28 (m, 13H), 7.24 – 7.20 (m, 2H), 7.15 (d,  $J = 11.7$  Hz, 1H), 7.02 (d,  $J = 11.7$  Hz, 1H);  $^{13}\text{C}$  NMR (100 MHz,  $\text{CDCl}_3$ )  $\delta$  193.6, 153.4, 147.6, 141.9, 141.2, 138.6, 132.8, 130.7, 130.1, 129.2, 128.9, 128.6, 128.6, 128.5, 128.5, 128.4, 123.5; HRMS (ESI)  $m/z$   $[\text{M}+\text{H}]^+$ : Calcd for  $\text{C}_{23}\text{H}_{19}\text{O}$ : 311.1436. Found: 311.1432.

**(E)-5,5-Dicyclohexyl-2-phenylpenta-2,4-dienal (4i):**

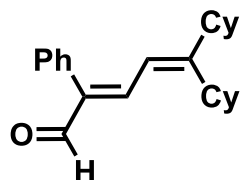

The title compound was prepared according to the general procedure. Purification by column chromatography (TLC  $R_f = 0.3$ ) on silica gel using EtOAc/PE (1:19) as the eluent the desired product **4i** as yellow oil in 76% yield (48.8 mg, 0.152 mmol);  $^1\text{H}$  NMR (400 MHz,  $\text{CDCl}_3$ )  $\delta$  9.66 (s, 1H), 7.51 (d,  $J = 11.9$  Hz, 1H), 7.44 – 7.40 (m, 2H), 7.36 – 7.34 (m, 1H), 7.25 – 7.22 (m, 2H), 6.24 (d,  $J = 11.9$  Hz, 1H), 2.87 (t,  $J = 12.9$  Hz, 1H), 2.09 (t,  $J = 11.8$  Hz, 1H), 1.84 – 1.56 (m, 10H), 1.46 – 1.36 (m, 4H), 1.24 – 0.96 (m, 6H);  $^{13}\text{C}$  NMR (100 MHz,  $\text{CDCl}_3$ )  $\delta$  193.6, 167.9, 145.5, 139.1, 132.9, 130.0,



128.1, 127.8, 119.1, 42.1, 41.8, 33.8, 30.8, 26.6, 26.3, 25.9, 25.8; HRMS (ESI)  $m/z$

$[M+H]^+$ : Calcd for  $C_{23}H_{31}O$ : 323.2375. Found: 323.2378.

**(E)-2,5,5-Triphenylpenta-2,4-dienal (4j):**

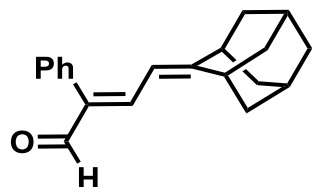

The title compound was prepared according to the general procedure. Purification by column chromatography (TLC  $R_f = 0.3$ ) on silica gel using EtOAc/PE (1:19) as the eluent the desired product **4j** as yellow oil in 55% yield (30.5 mg, 0.110 mmol);  $^1H$  NMR (400 MHz,  $CDCl_3$ )  $\delta$  9.63 (s, 1H), 7.44 – 7.31 (m, 4H), 7.26 – 7.25 (m, 1H), 7.24 – 7.23 (d,  $J = 1.3$  Hz, 1H), 6.19 (d,  $J = 12.1$  Hz, 1H), 3.31, (s, 1H), 2.44 (s, 1H), 2.05 – 1.79 (m, 13H);  $^{13}C$  NMR (100 MHz,  $CDCl_3$ )  $\delta$  193.7, 167.2, 145.2, 139.0, 133.0, 129.9, 128.2, 127.7, 114.4, 41.9, 40.0, 39.4, 36.8, 33.8, 28.2; HRMS (ESI)  $m/z$   $[M+H]^+$ : Calcd for  $C_{20}H_{23}O$ : 279.1749. Found: 279.1745.

### NOESY NMR spectra of product:

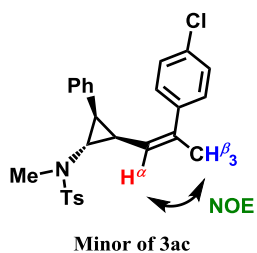

NOE was observed between  $H^{\alpha}$  and  $H^{\beta}$

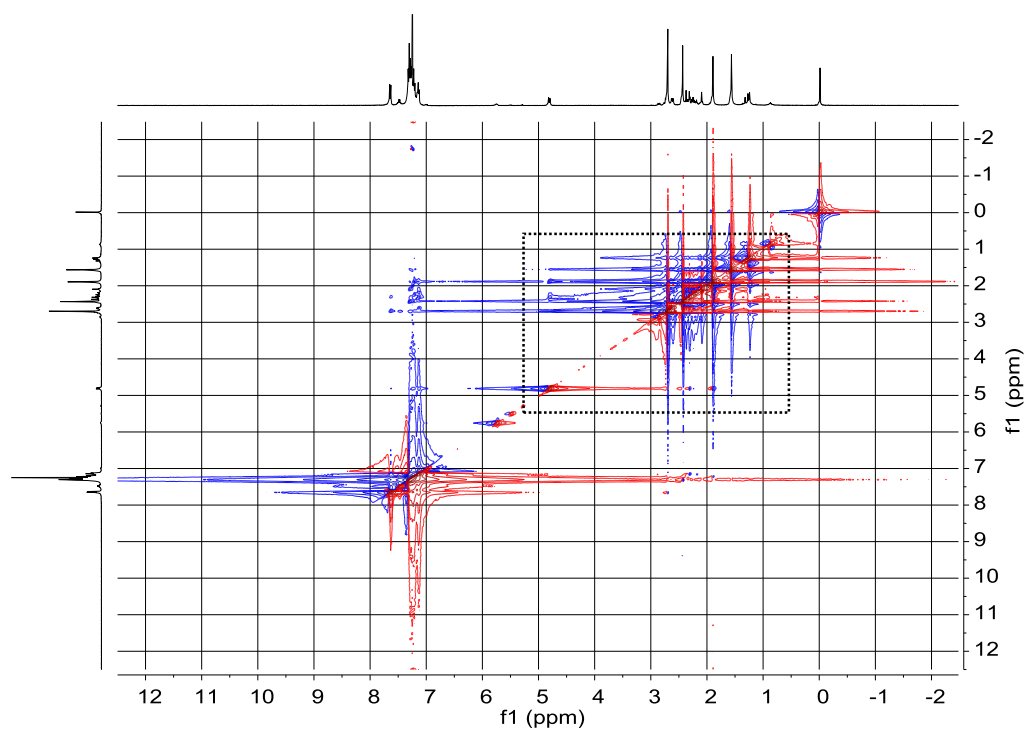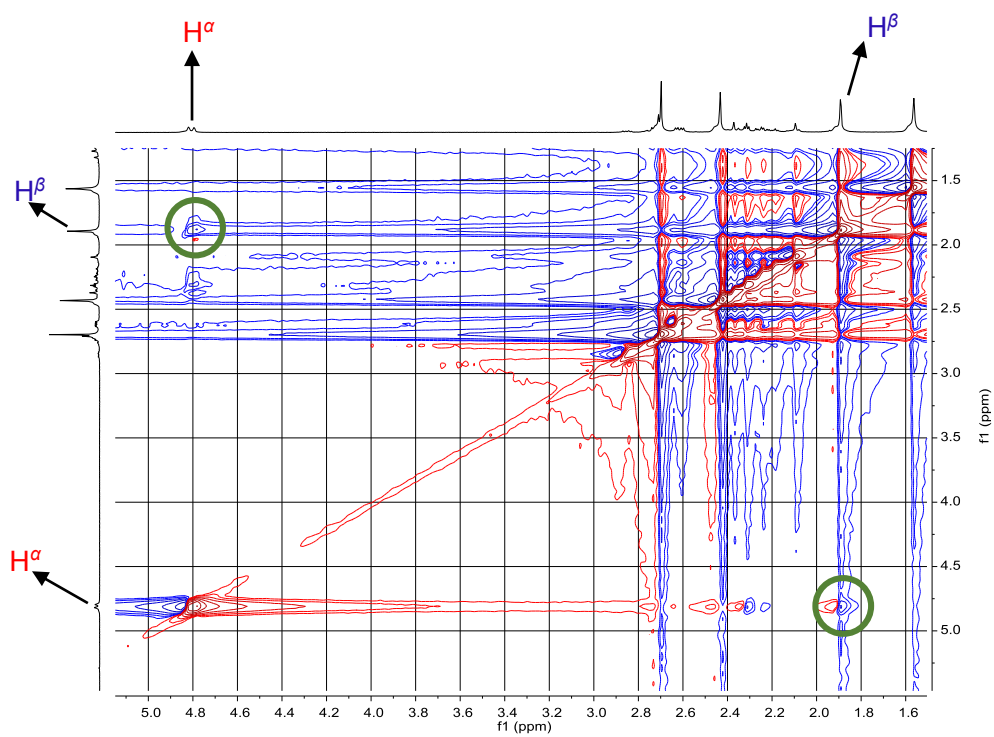

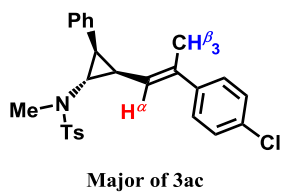

No NOE was observed between  $H^\alpha$  and  $H^\beta$

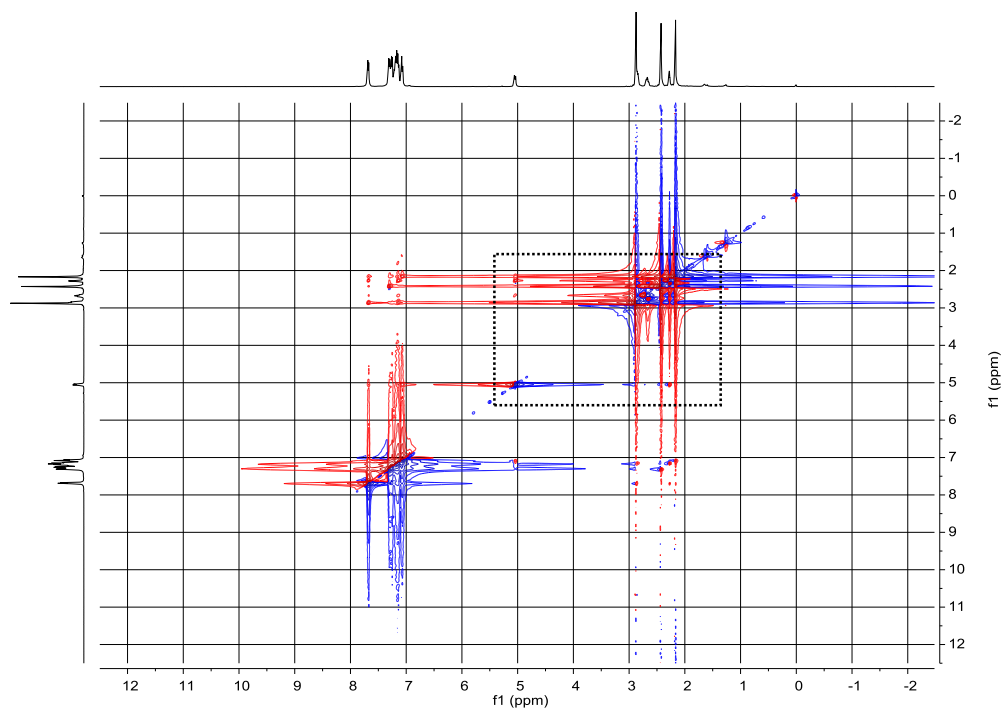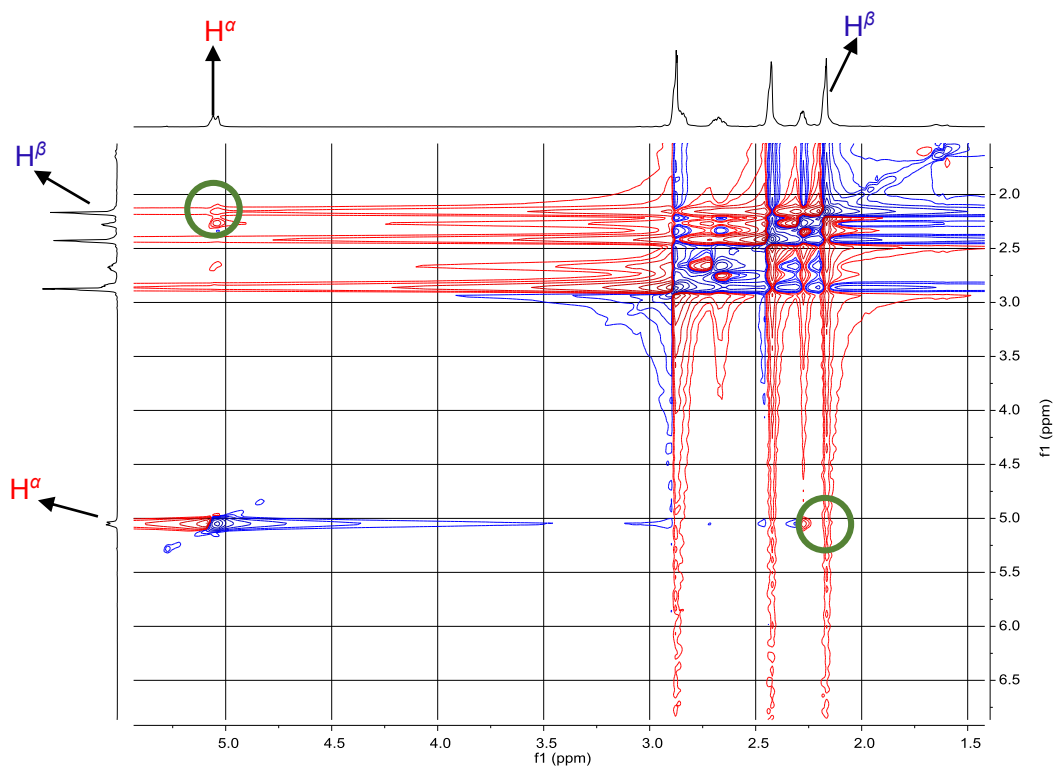

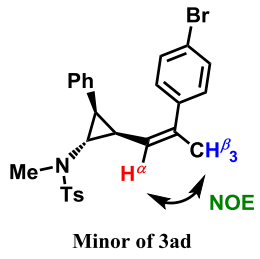

NOE was observed between  $H^\alpha$  and  $H^\beta$

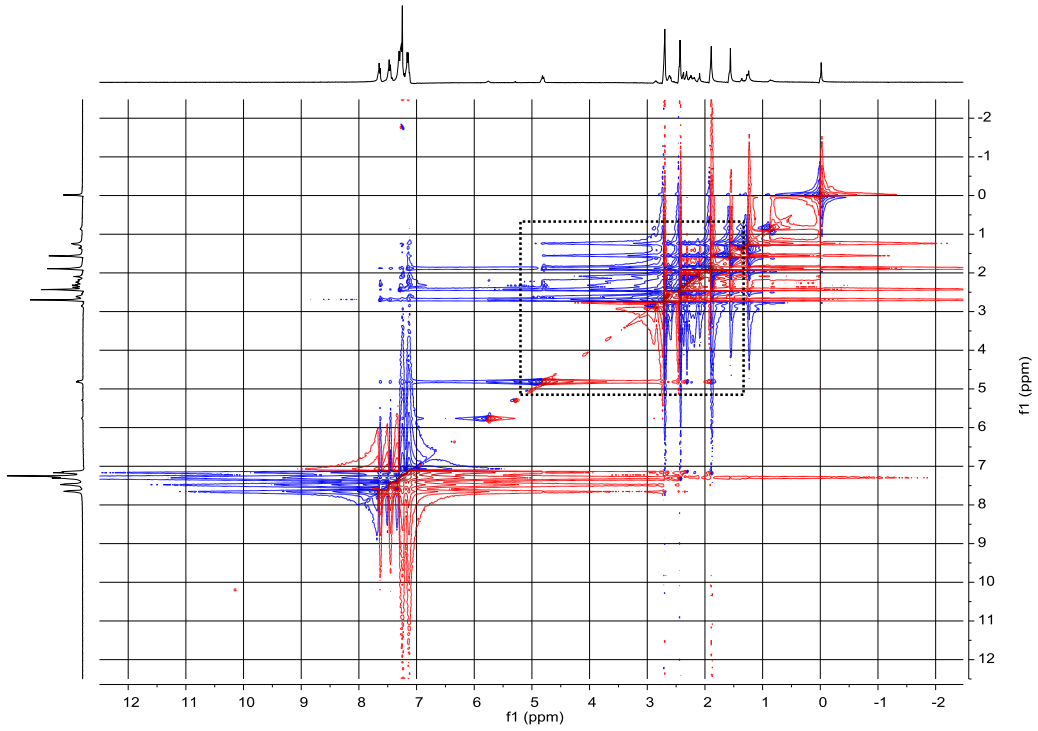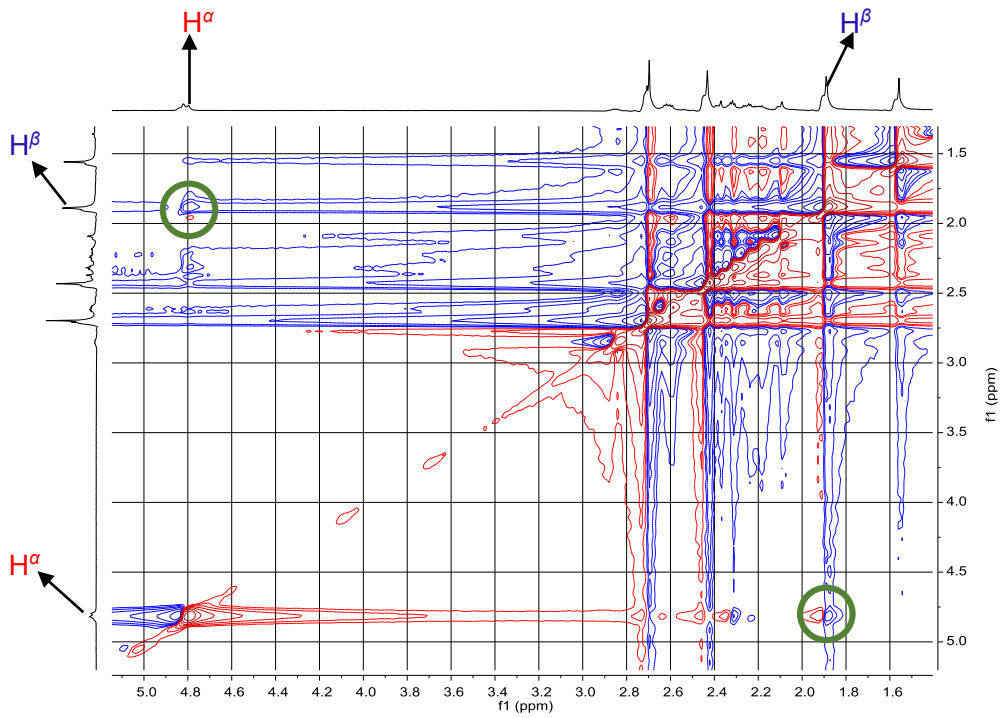

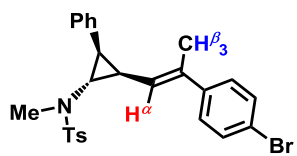

Major of 3ad

No NOE was observed between  $\text{H}^{\alpha}$  and  $\text{H}^{\beta}$

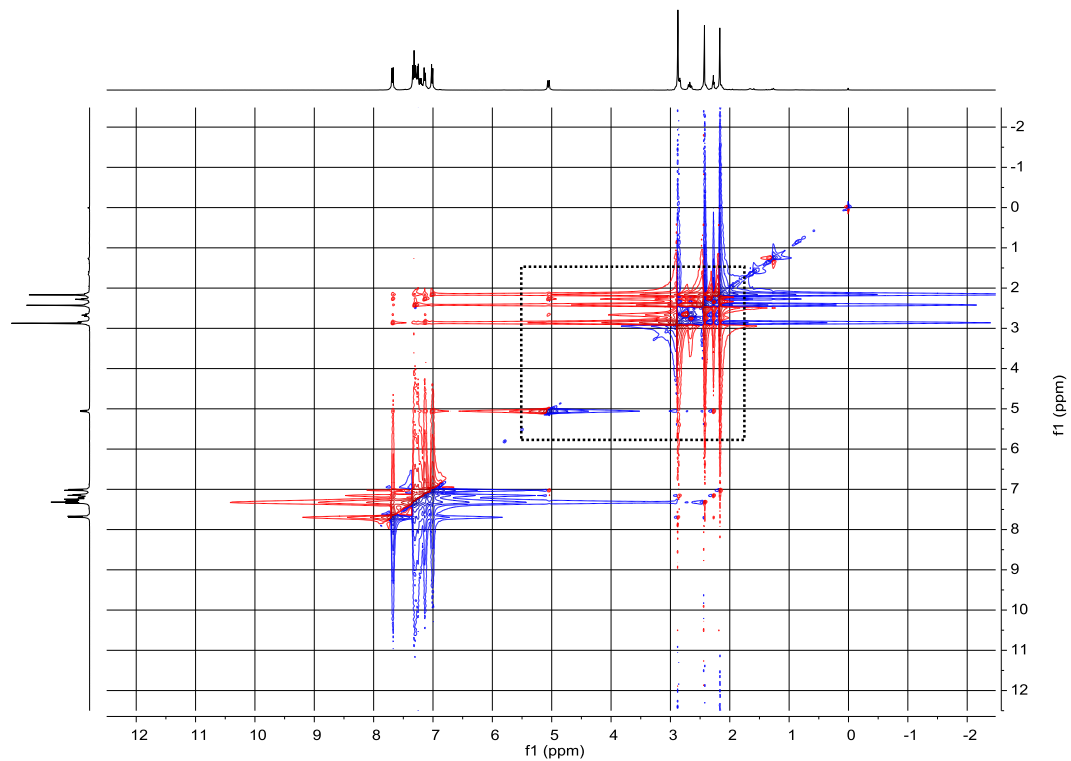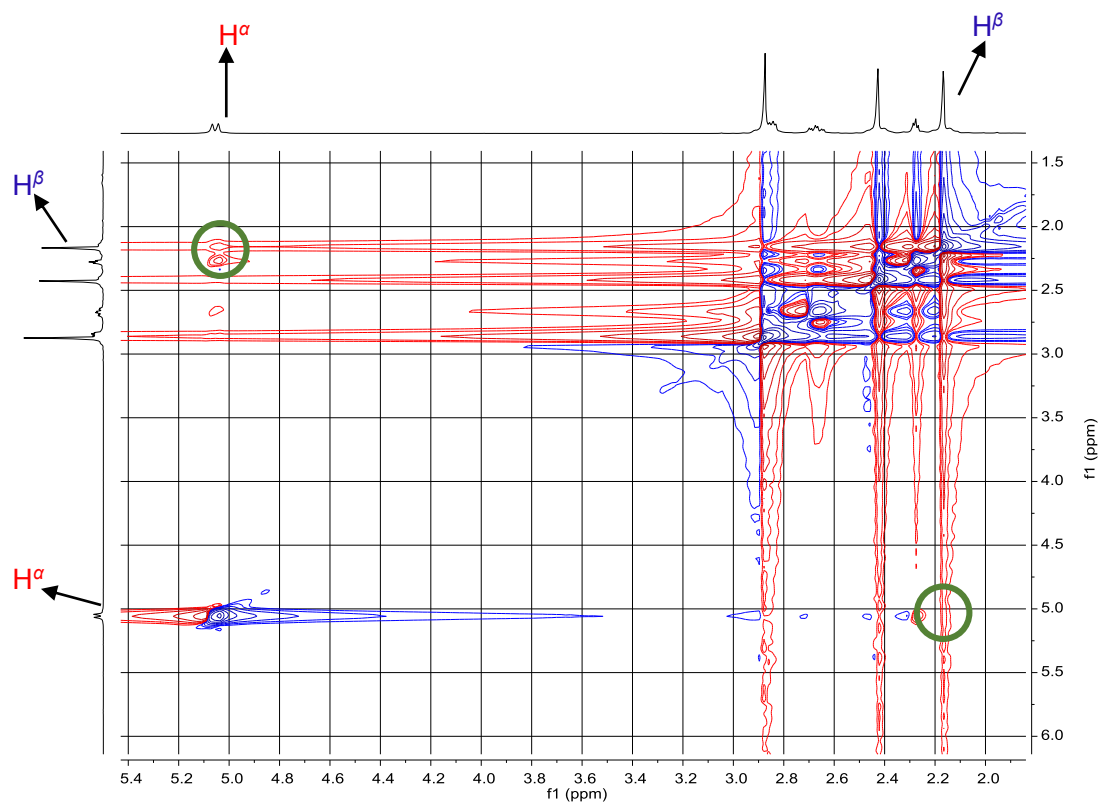

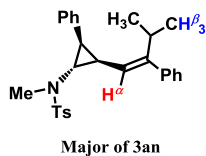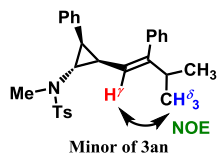

No NOE was observed

between  $H^\alpha$  and  $H^\beta$ ;

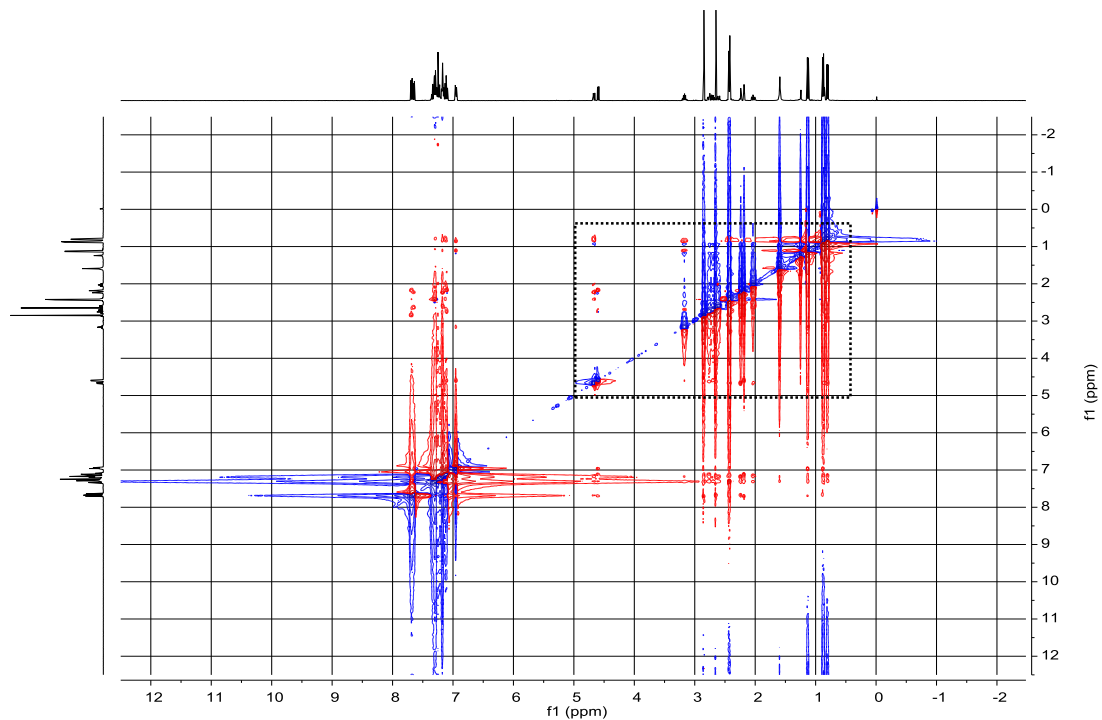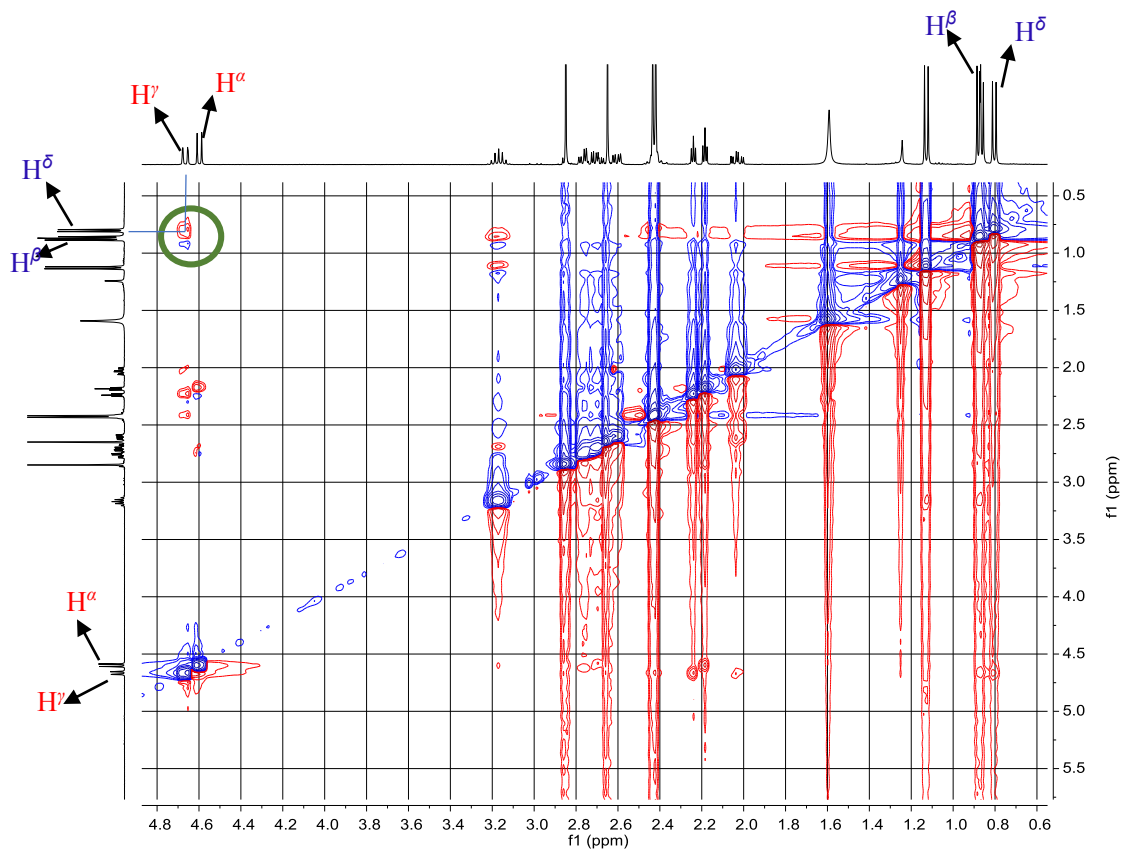

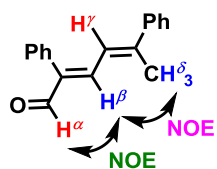

Major of 4a

NOE was observed between  $H^\alpha$  and  $H^\beta$   
 NOE was observed between  $H^\beta$  and  $H^\delta$   
 No NOE was observed between  $H^\gamma$  and  $H^\delta$   
 No NOE was observed between  $H^\beta$  and  $H^\gamma$

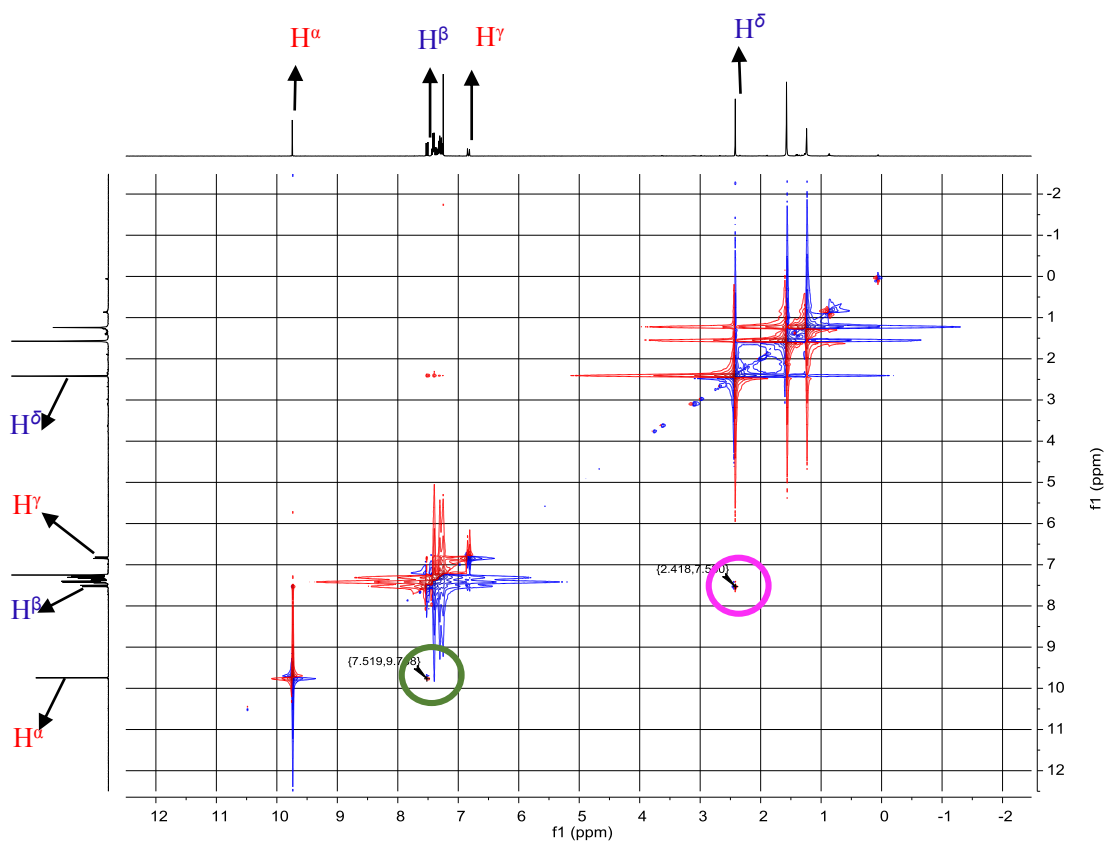

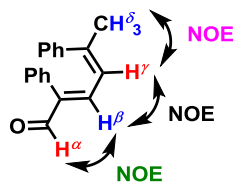

Minor of 4a

NOE was observed between  $H^\alpha$  and  $H^\beta$   
 NOE was observed between  $H^\beta$  and  $H^\gamma$   
 NOE was observed between  $H^\gamma$  and  $H^\delta$   
 No NOE was observed between  $H^\beta$  and  $H^\delta$

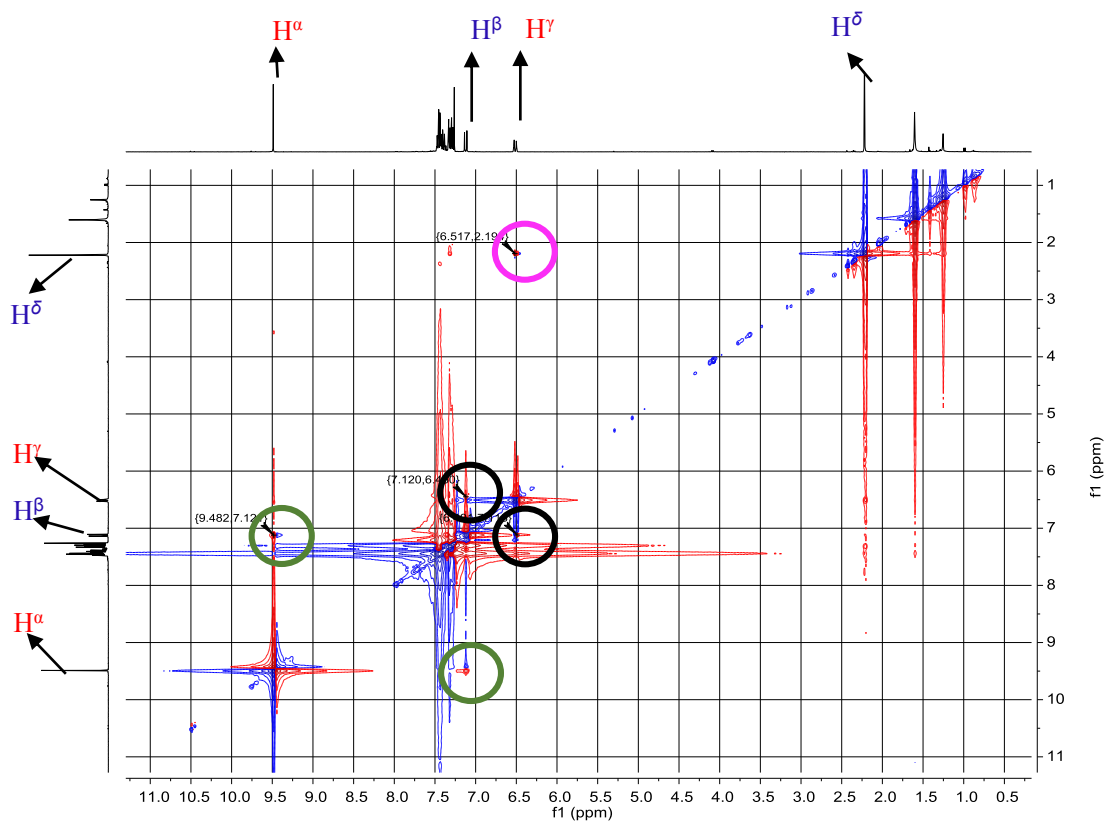



### NMR spectra for enamides:

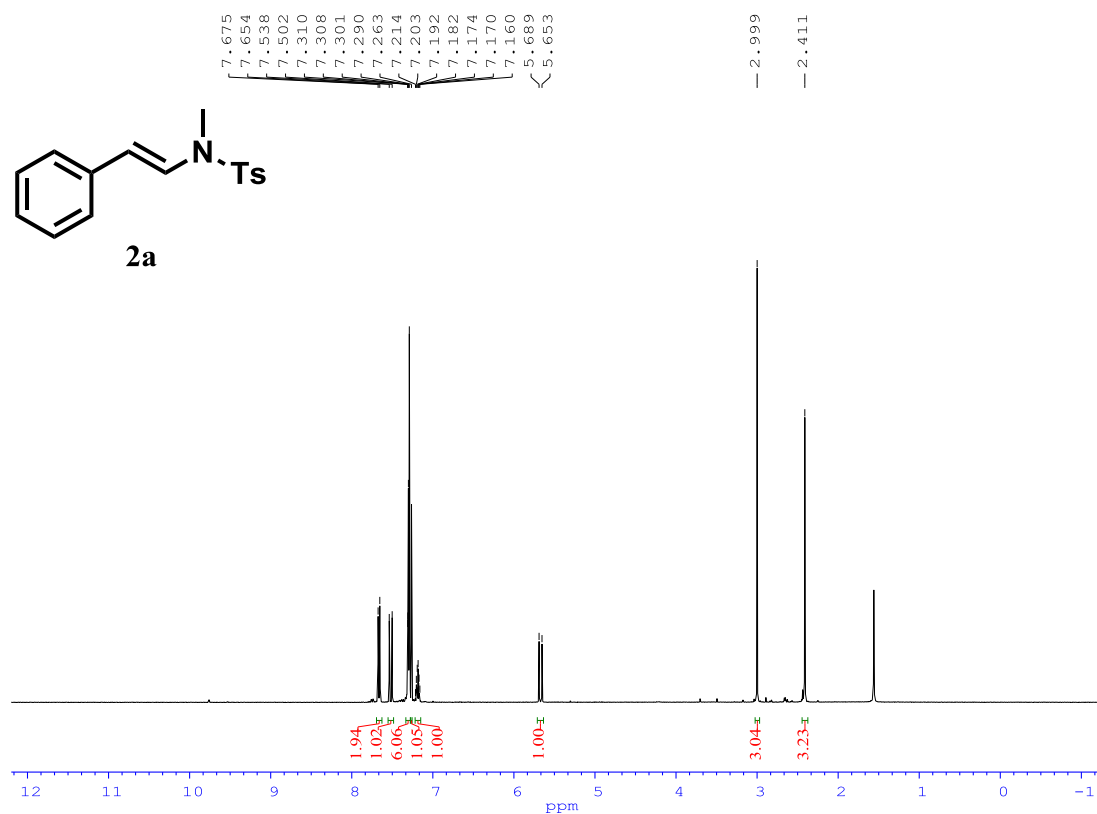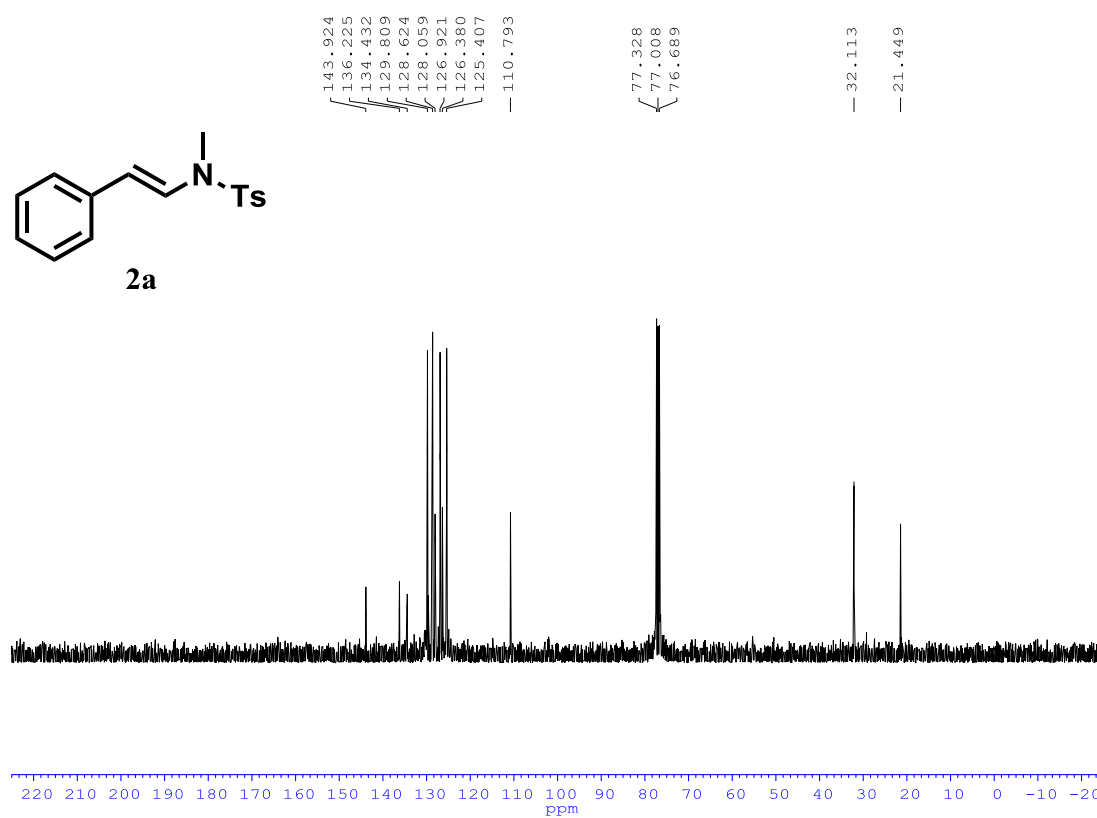

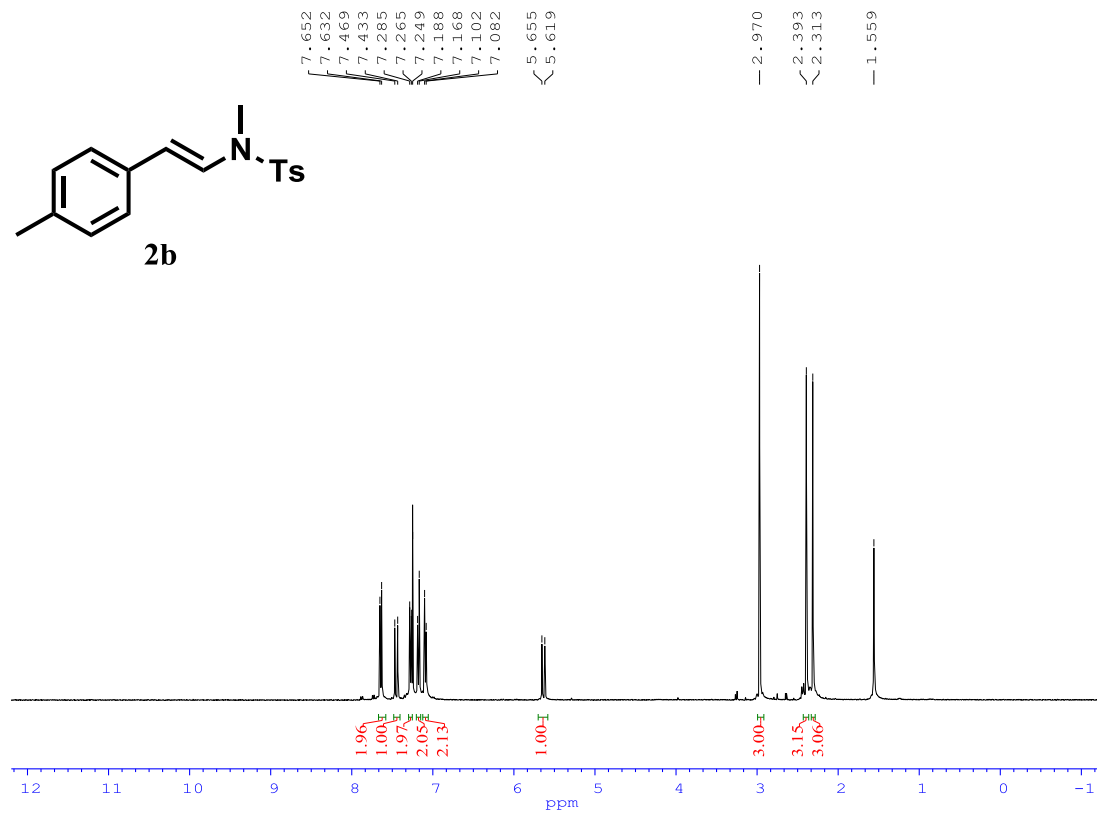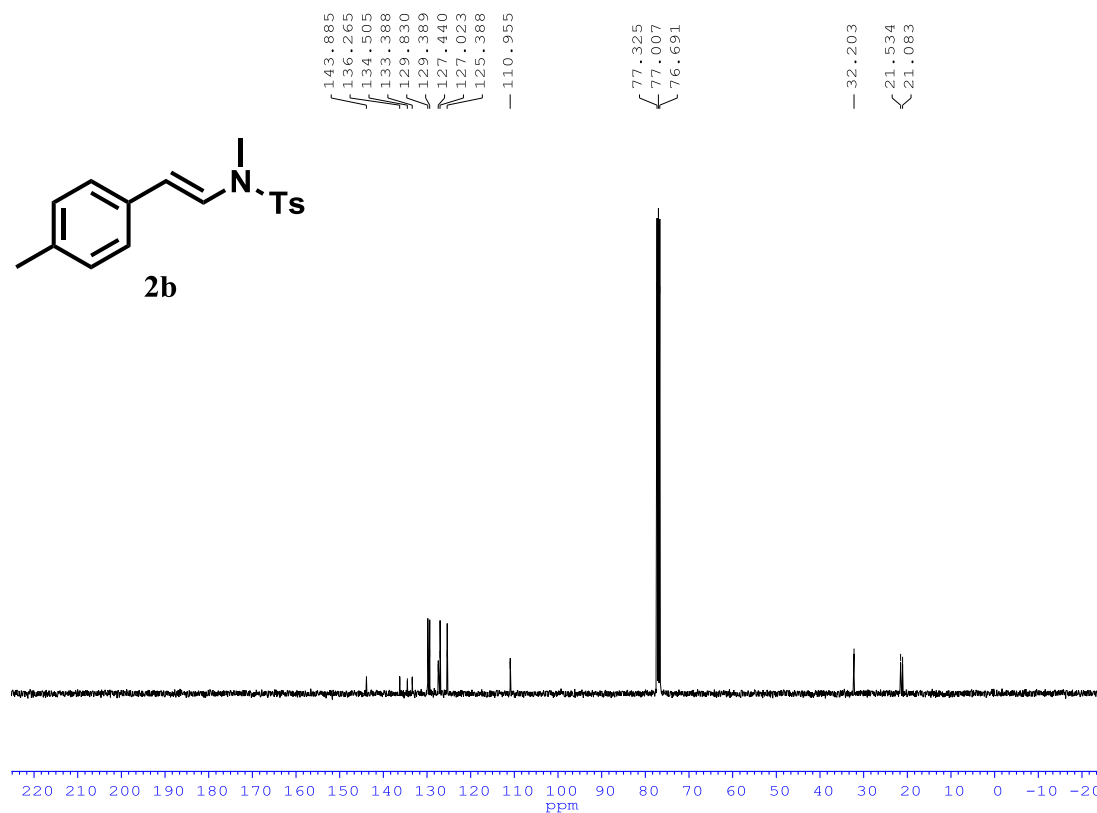

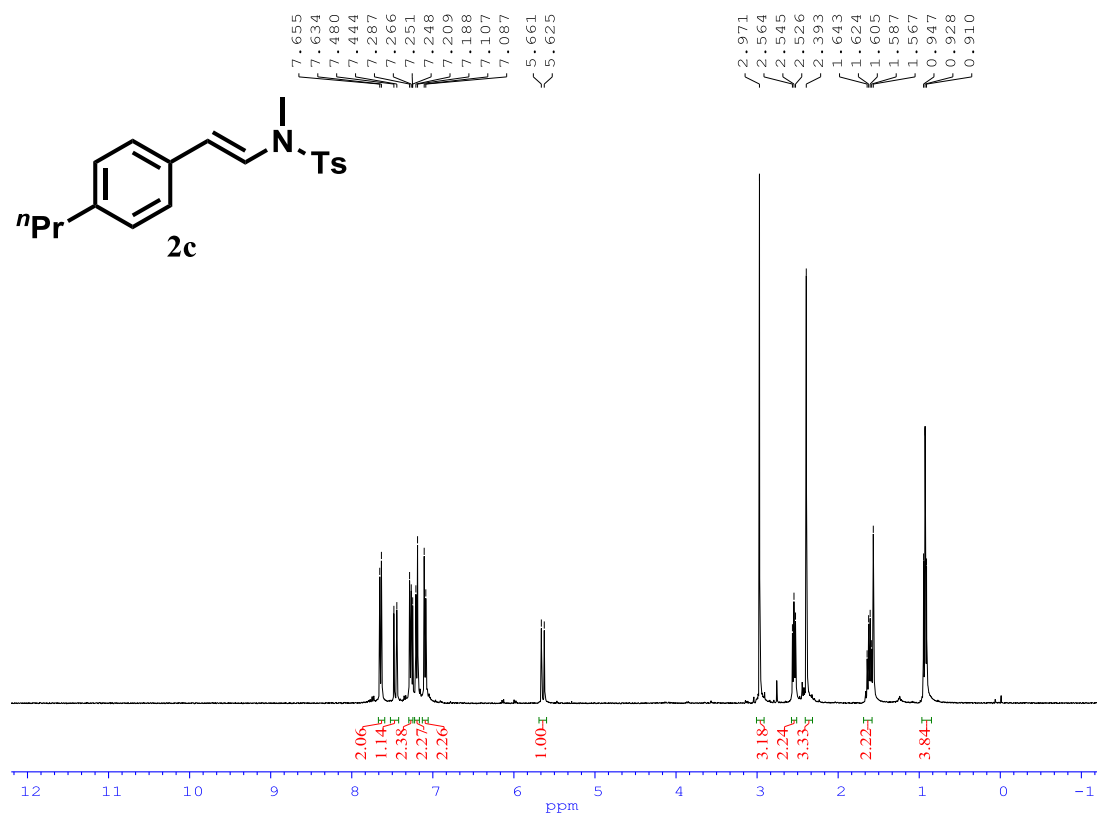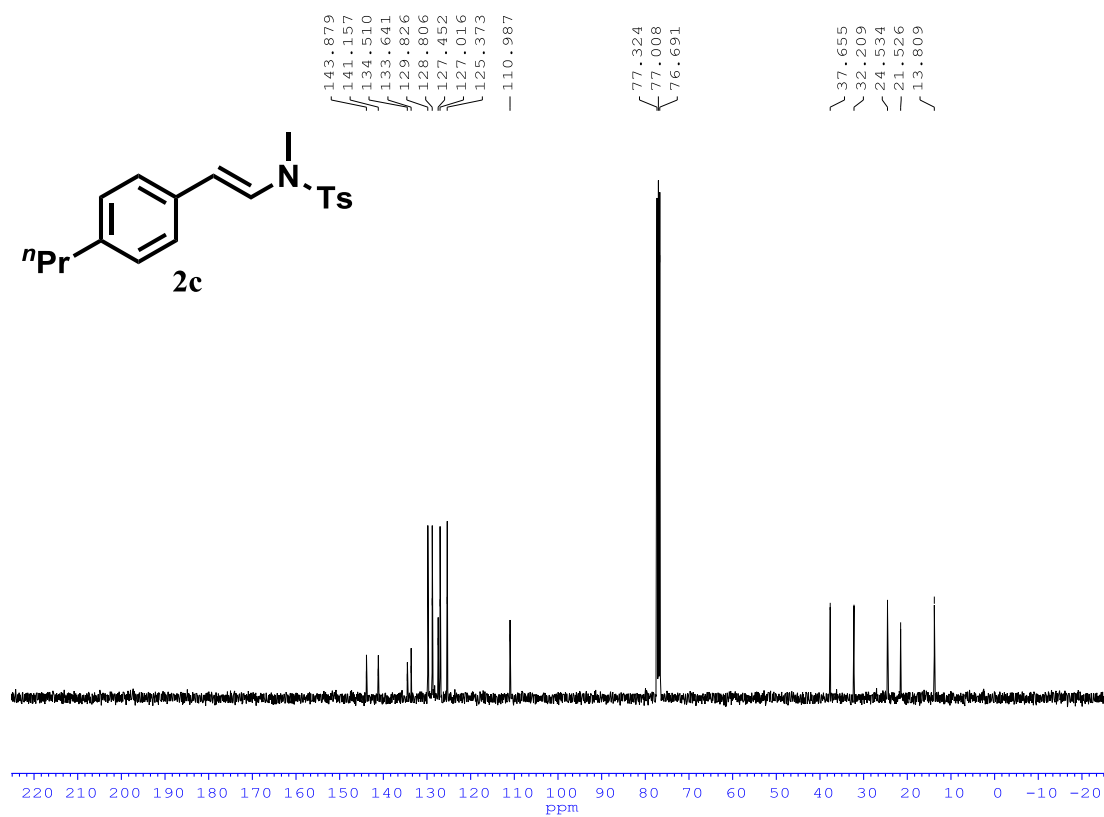

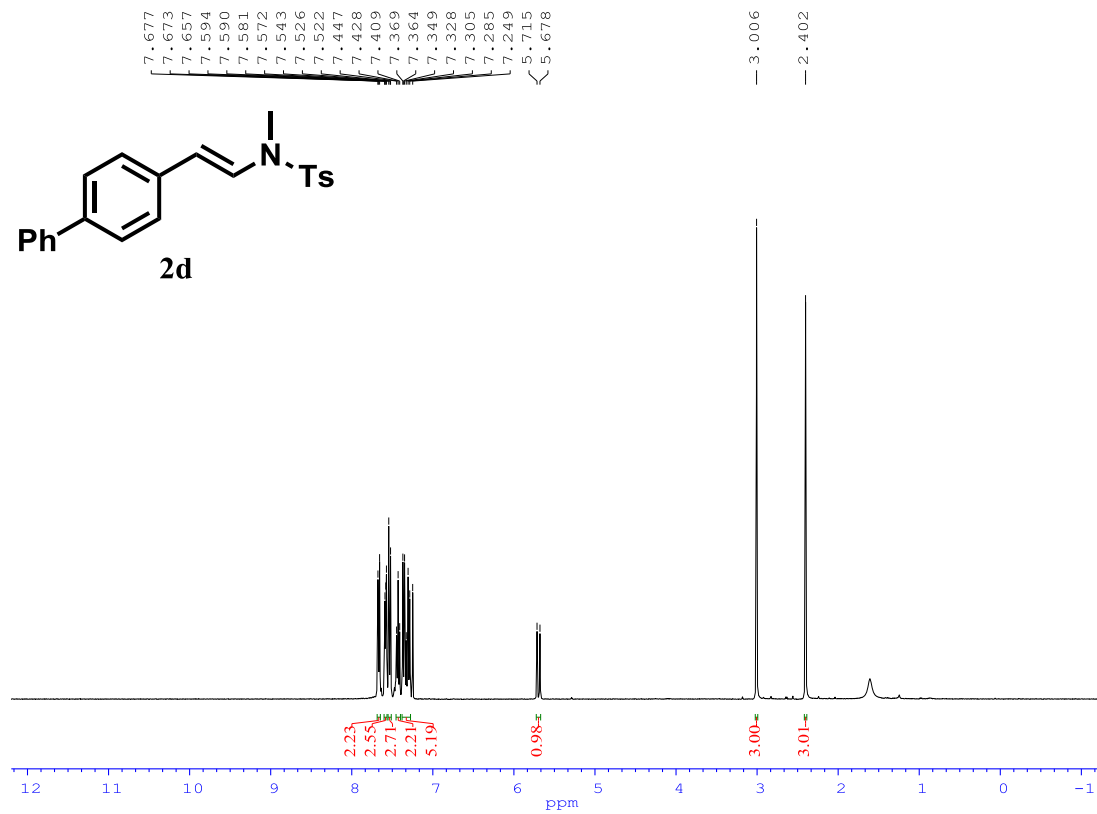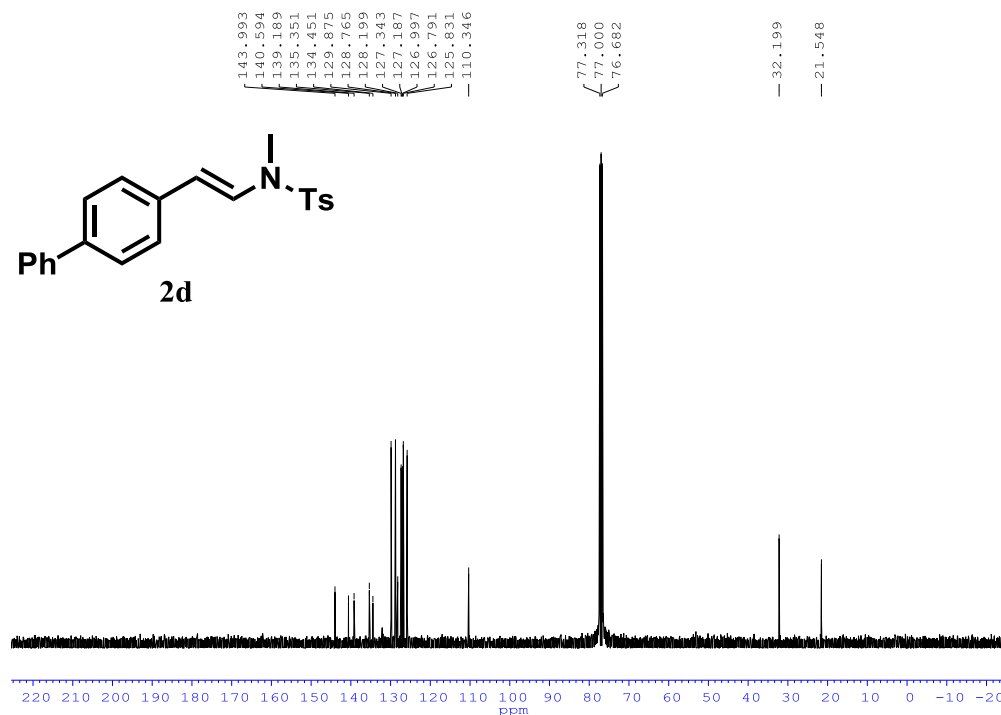

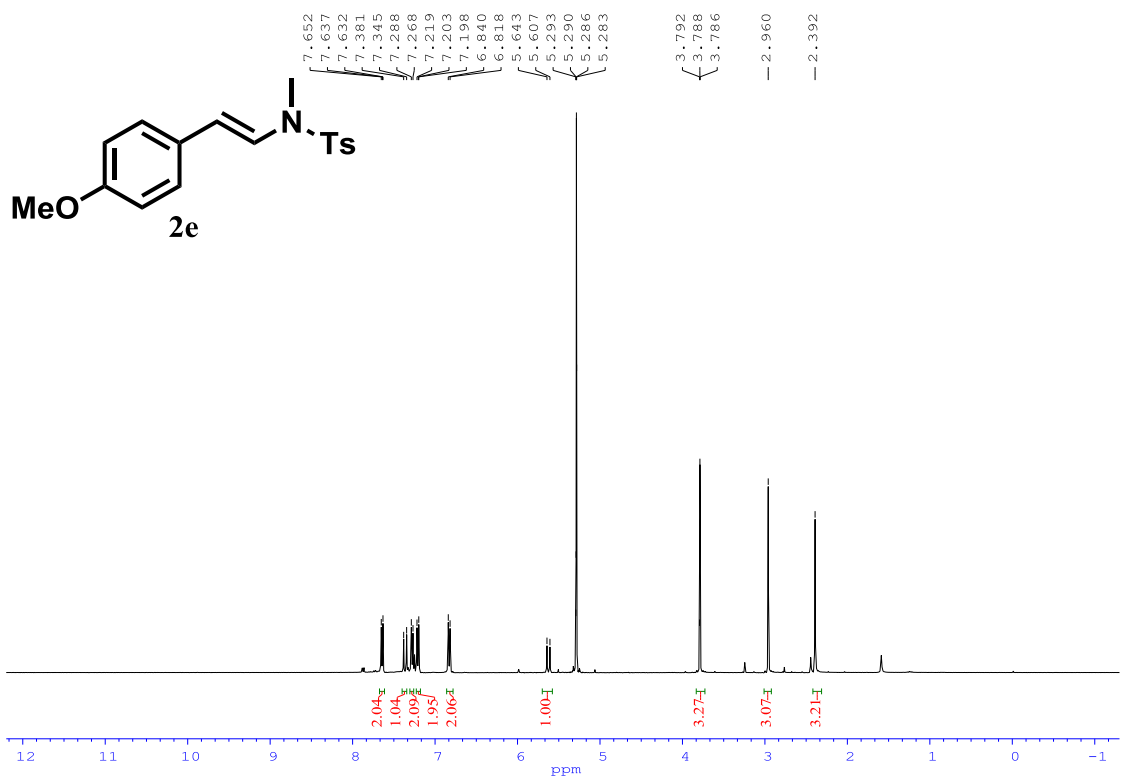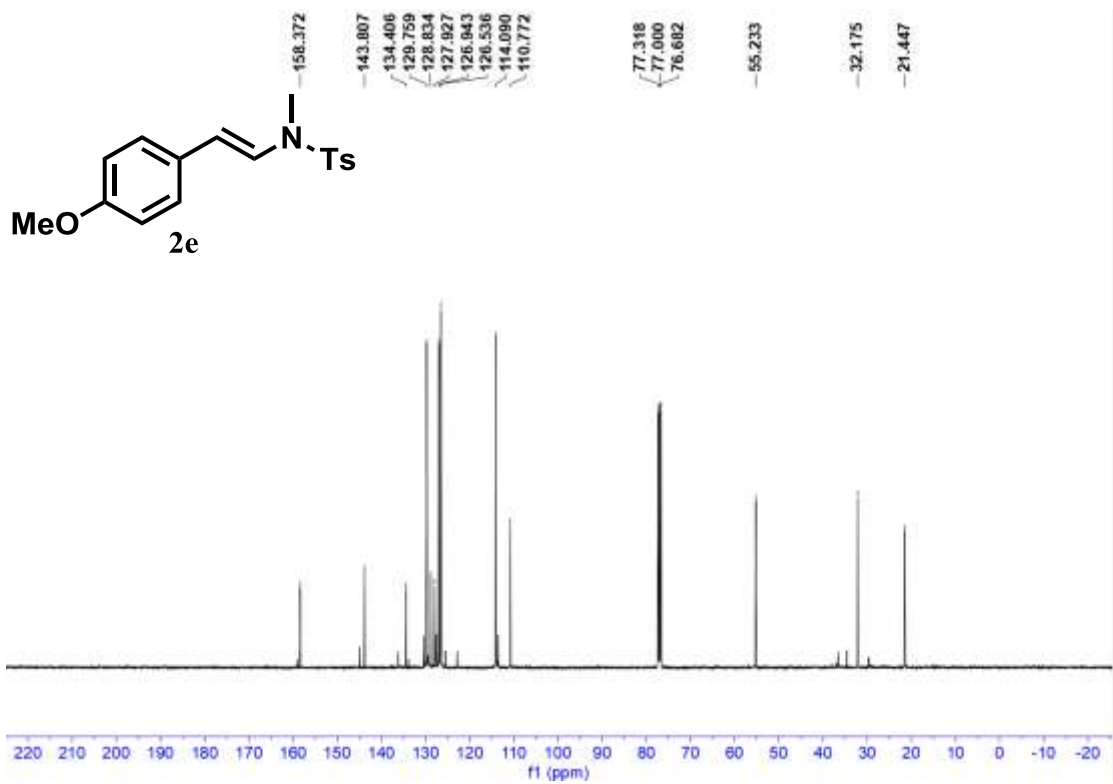

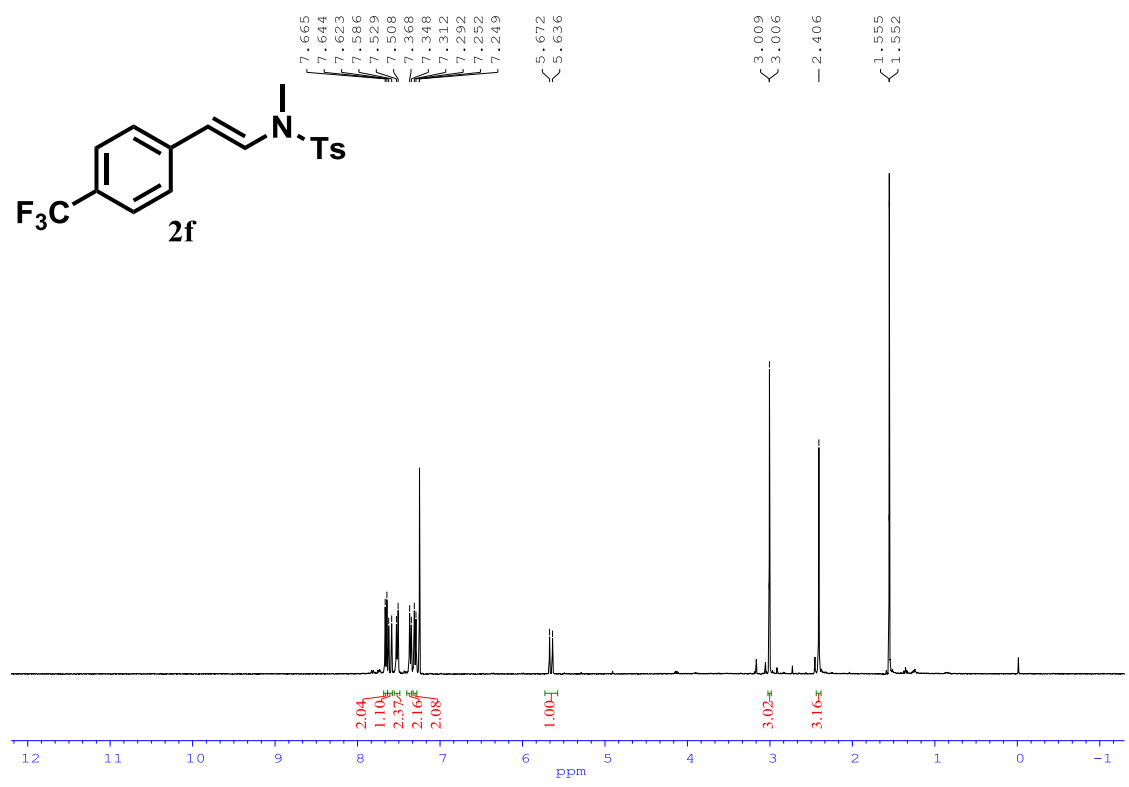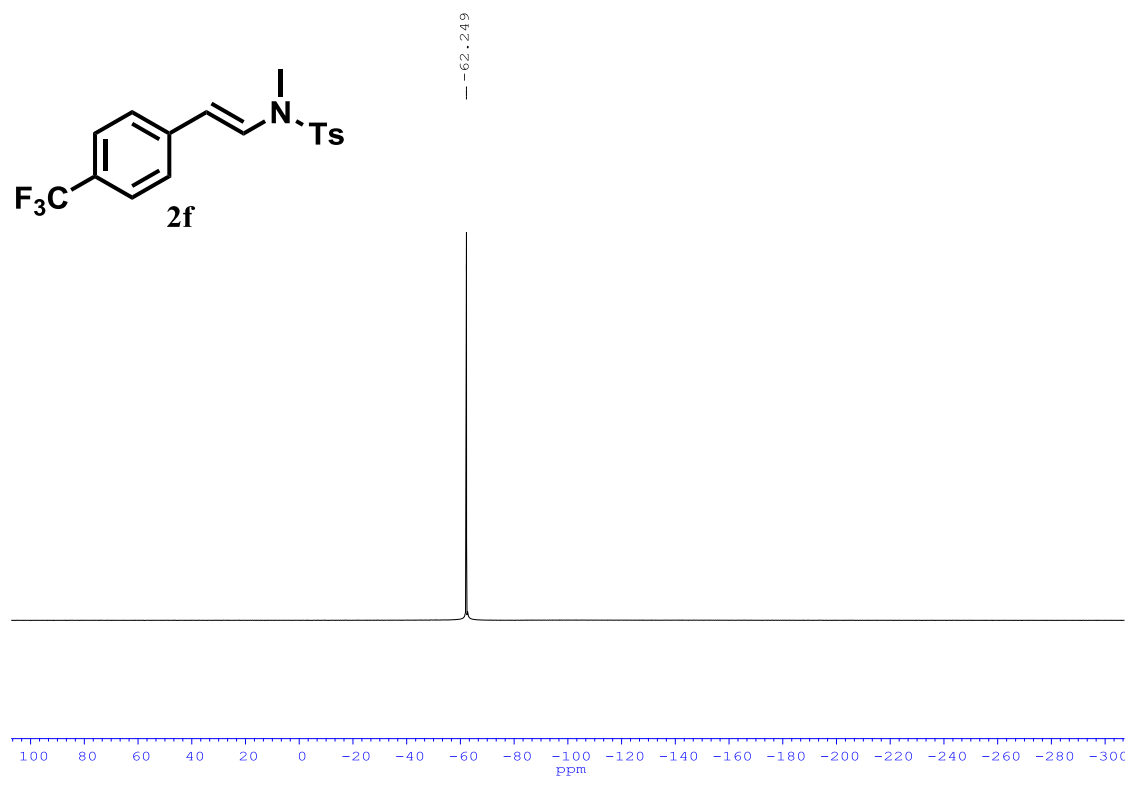

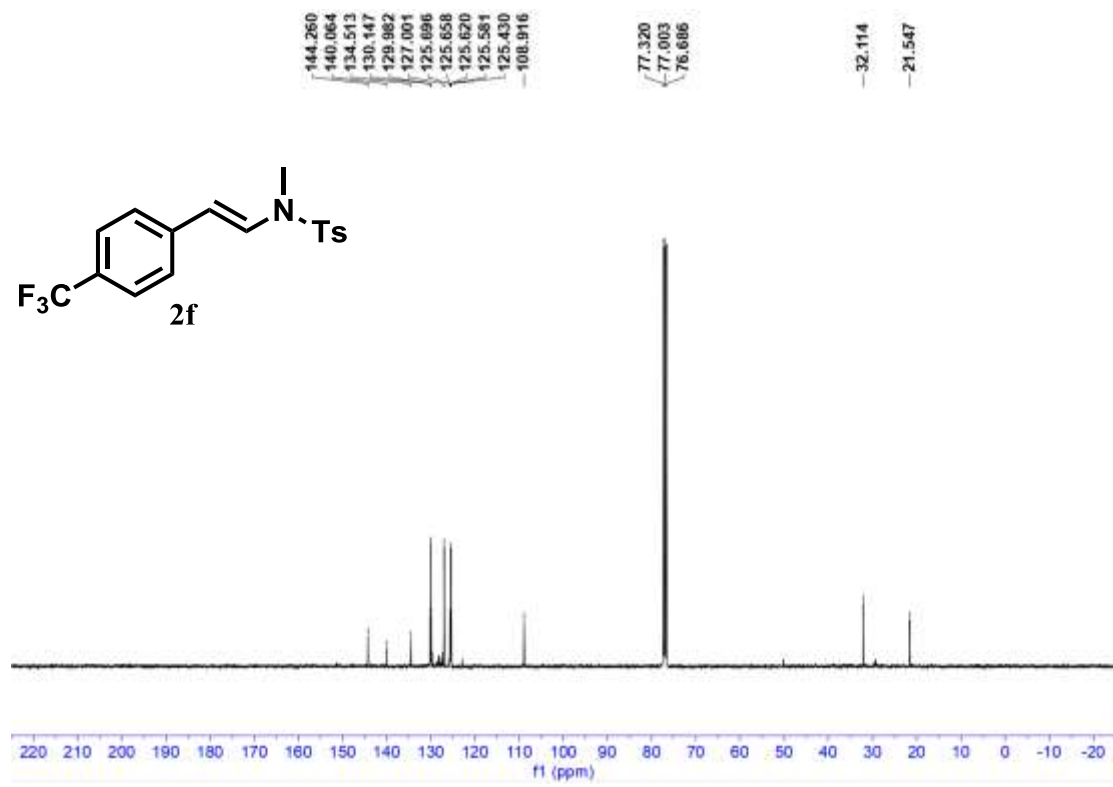

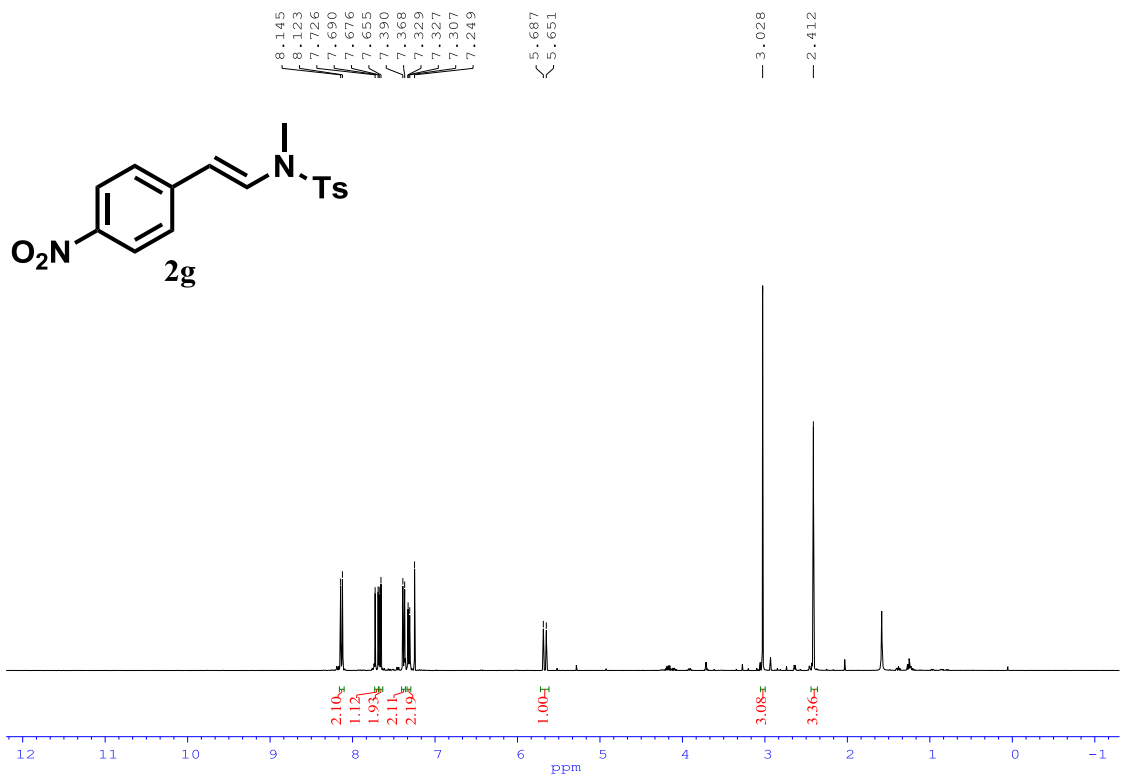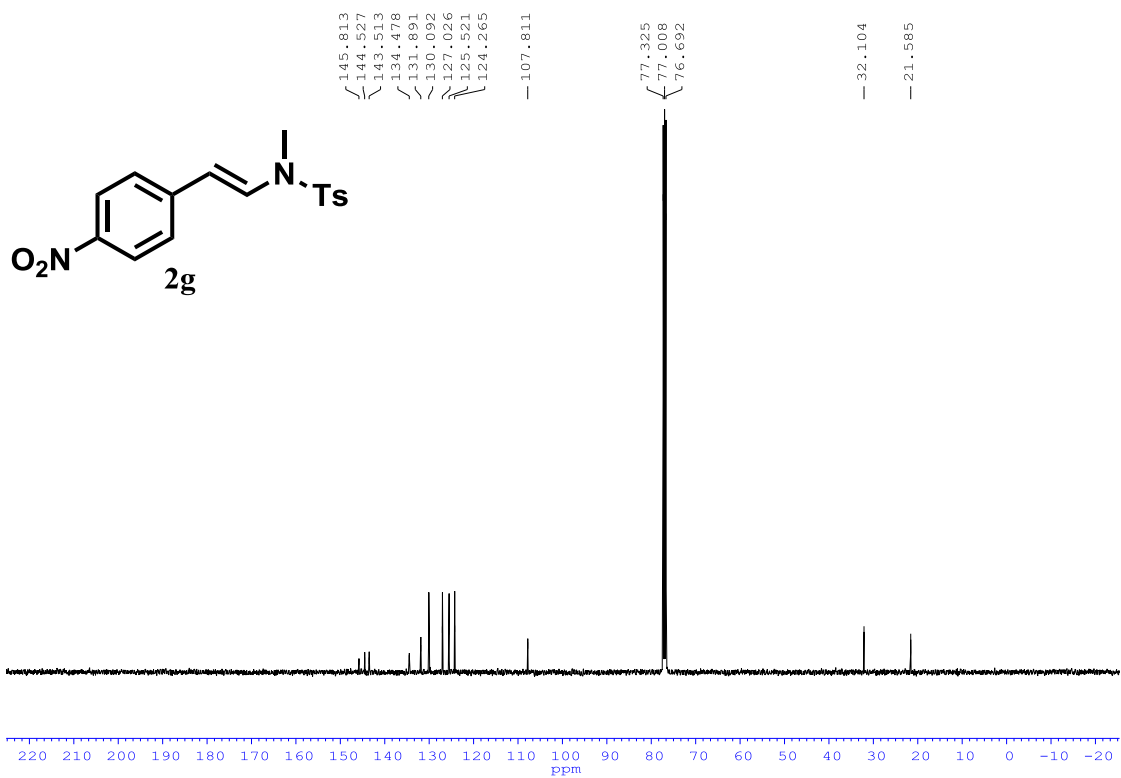



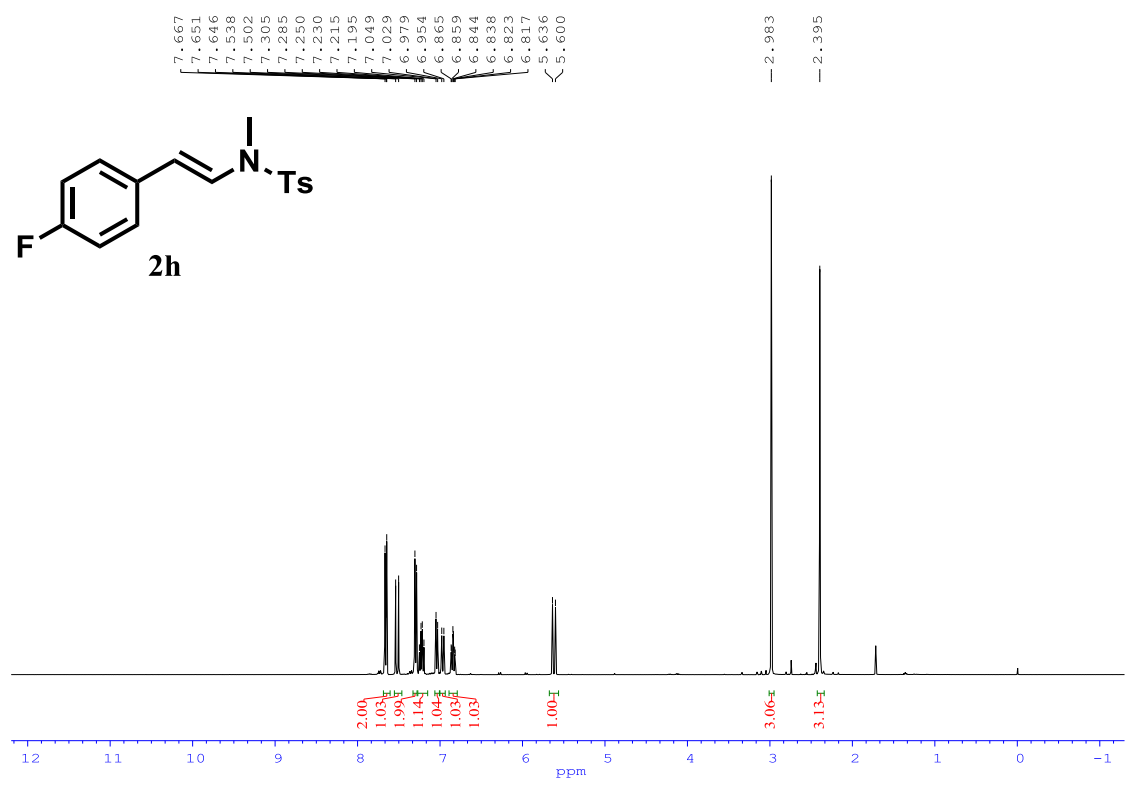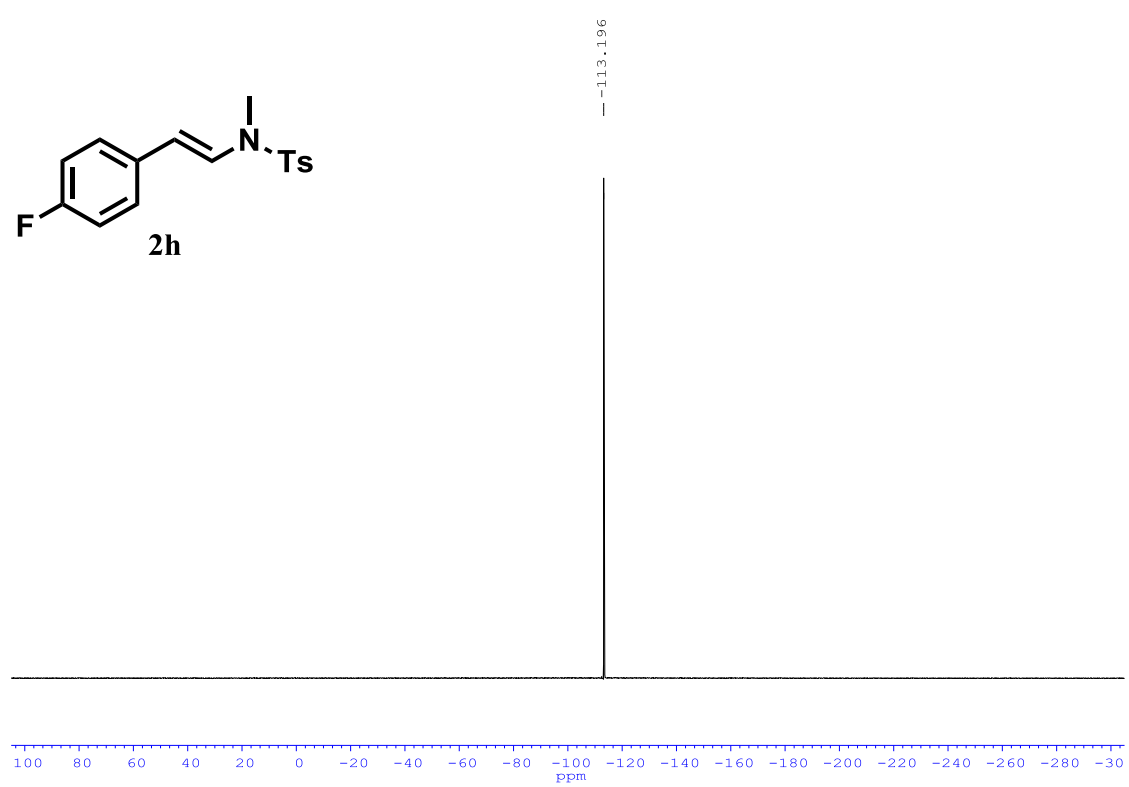

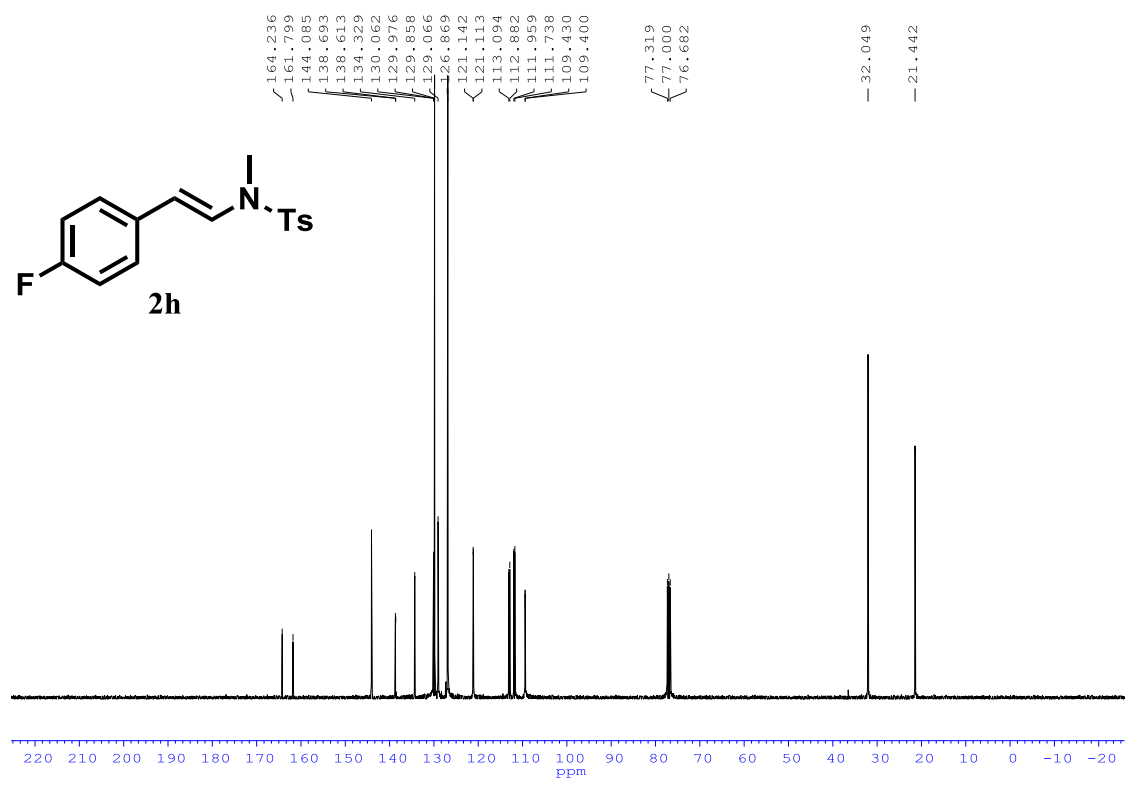

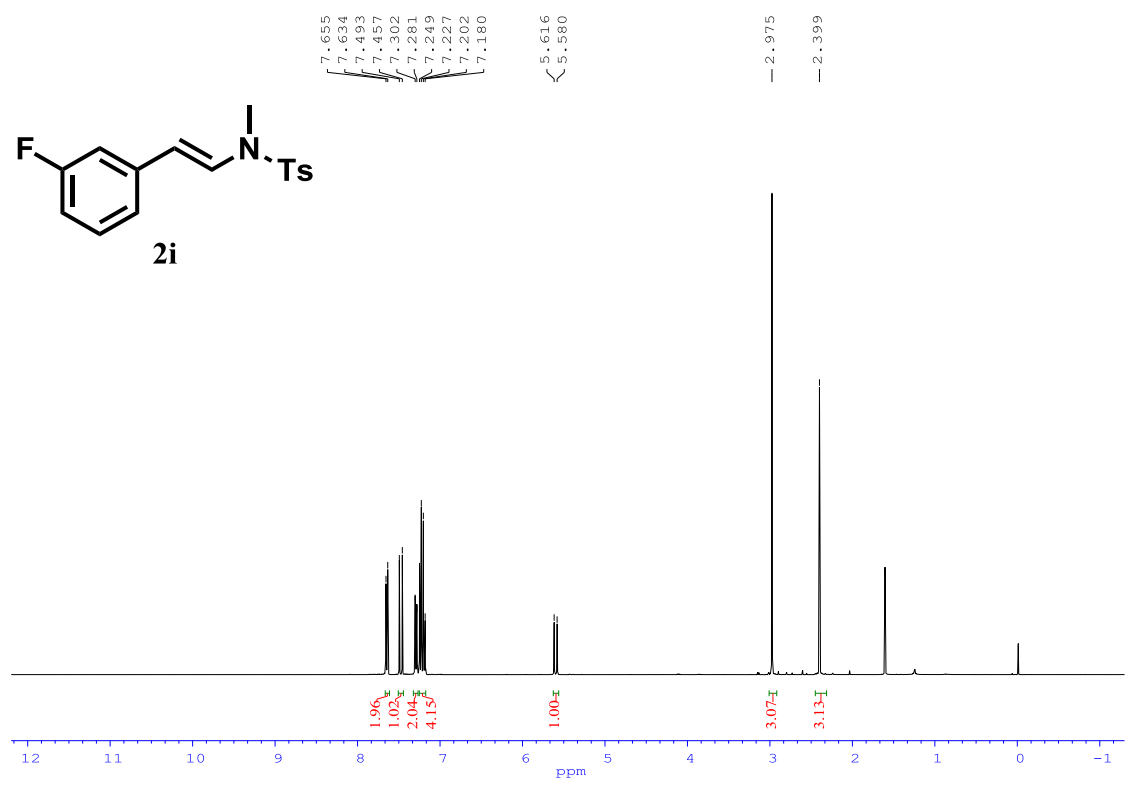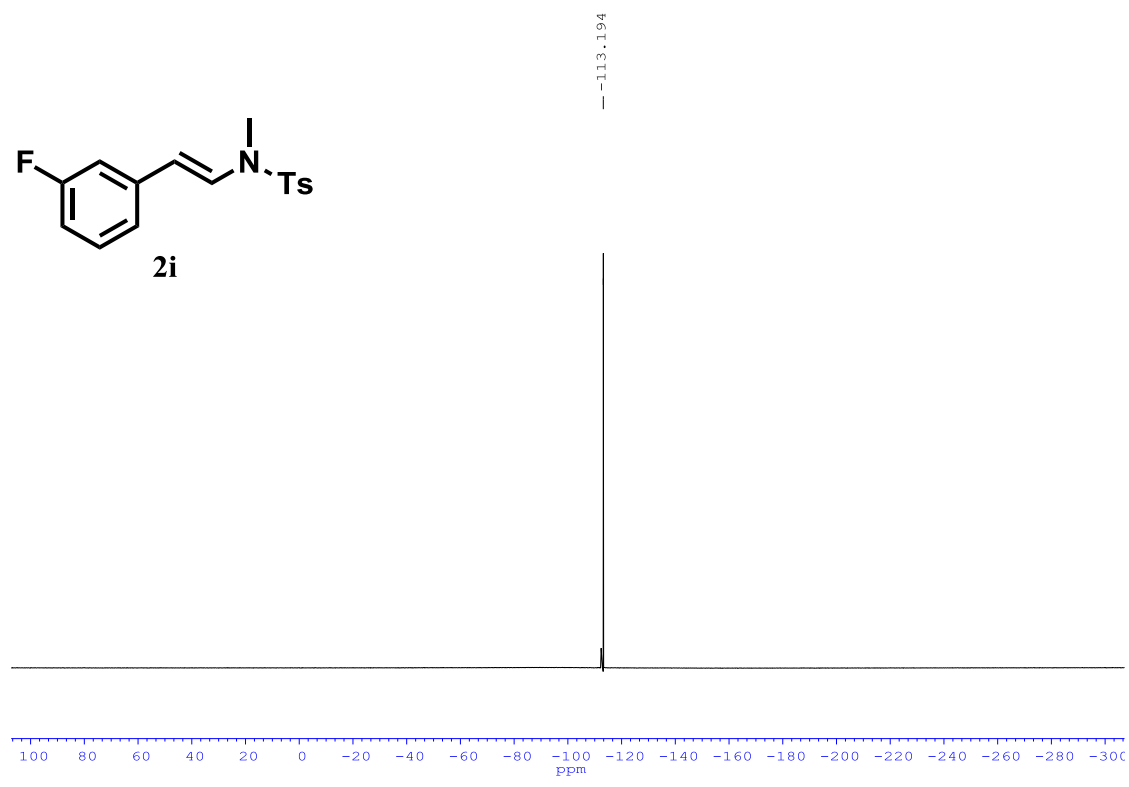

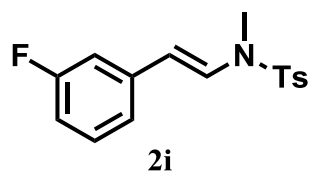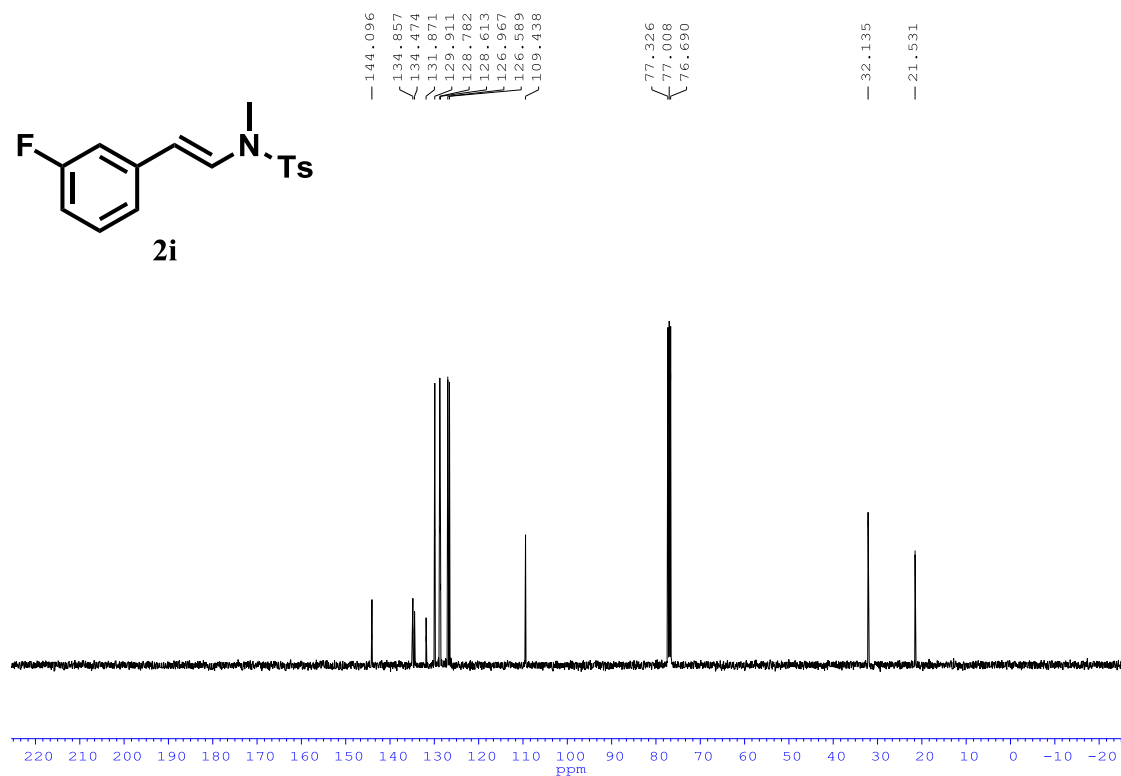

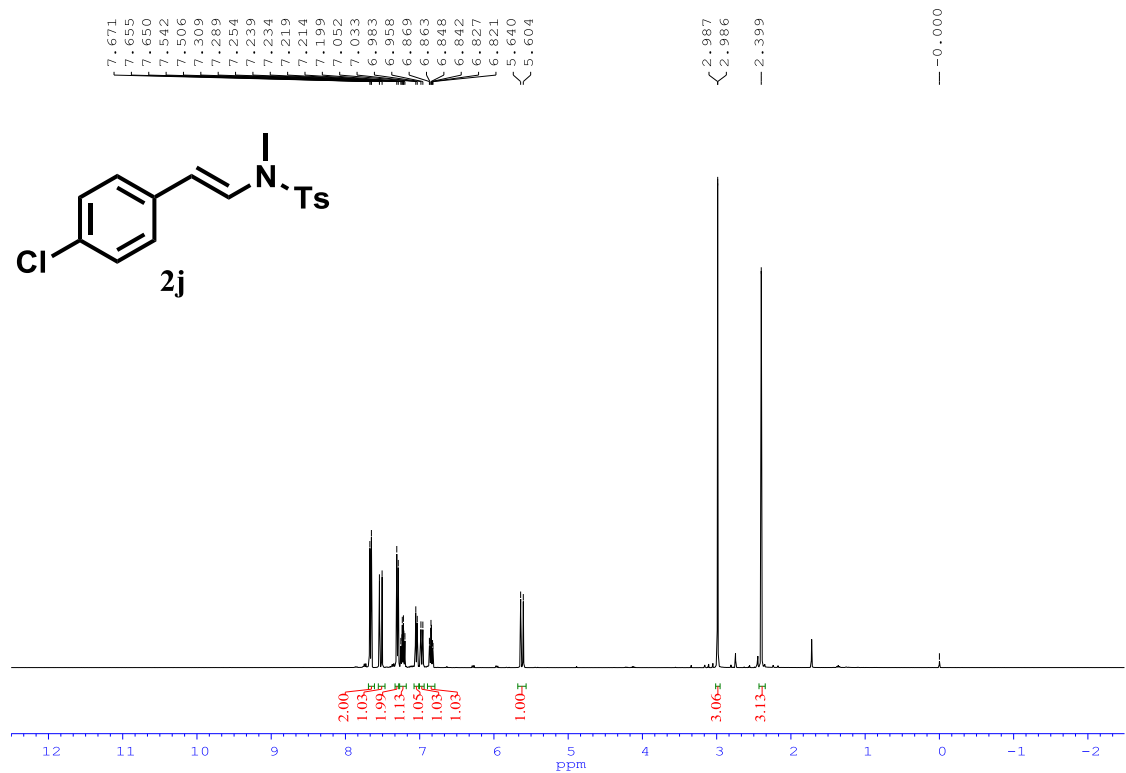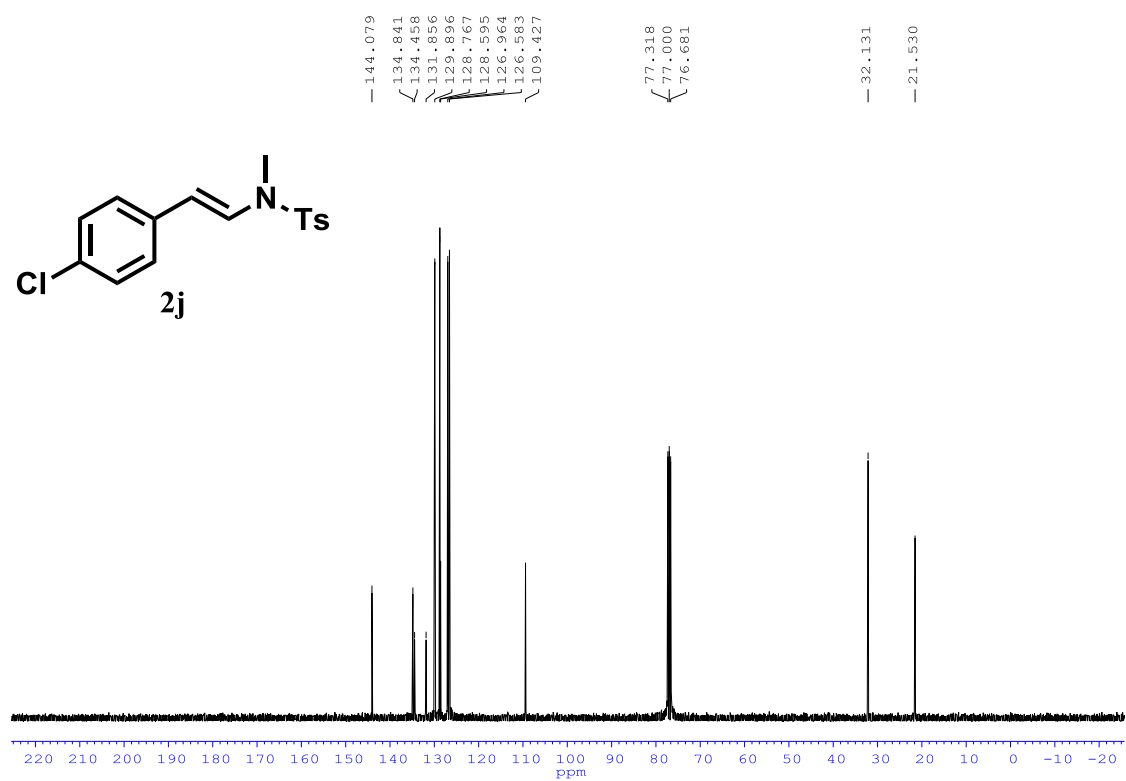

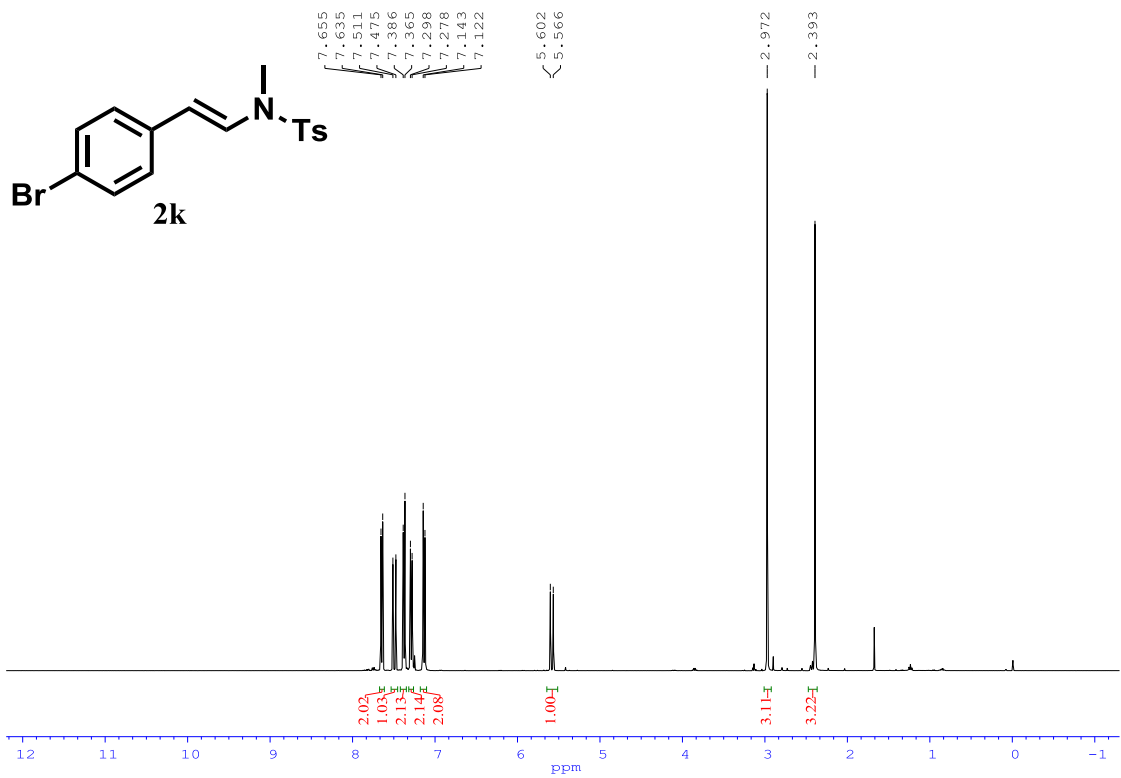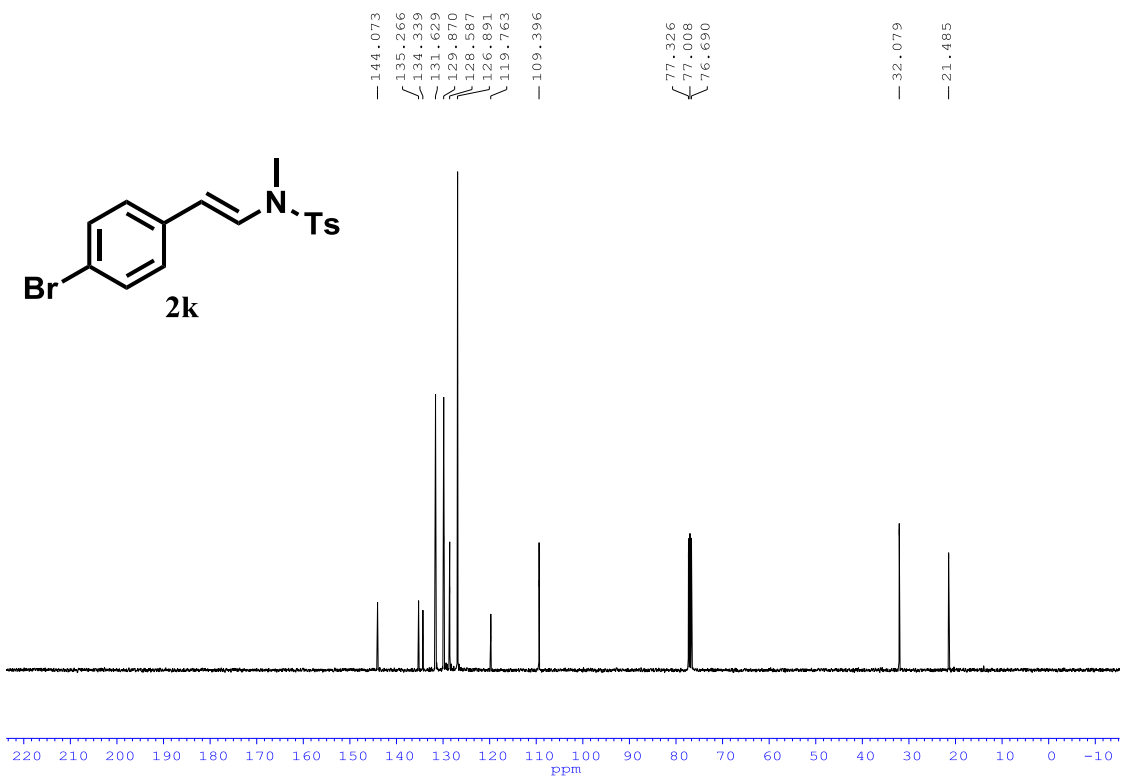

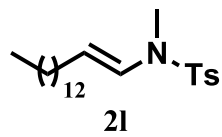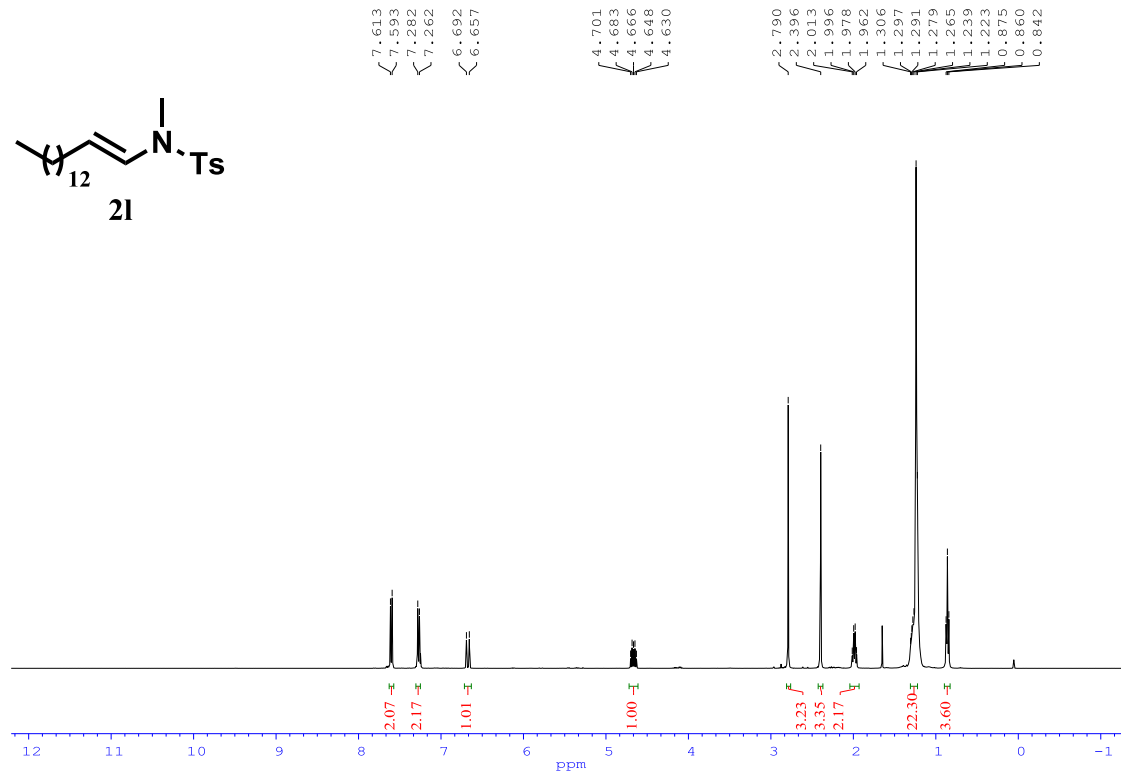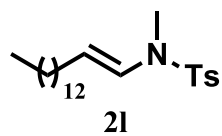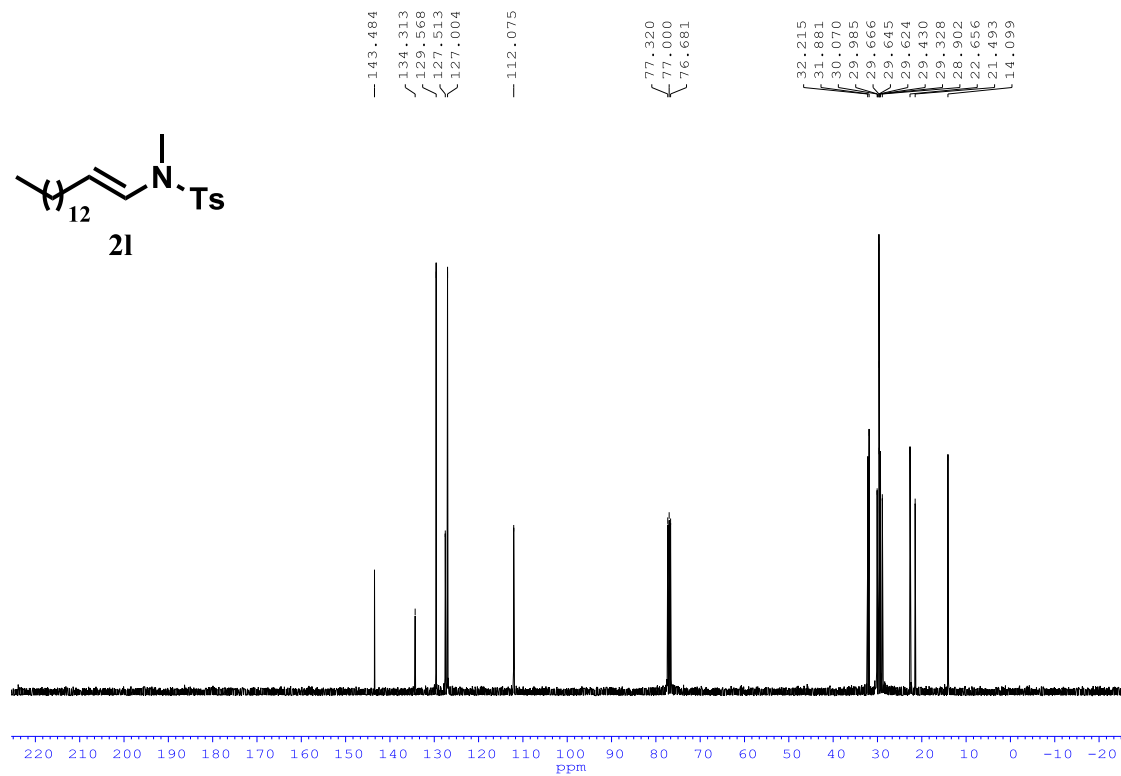

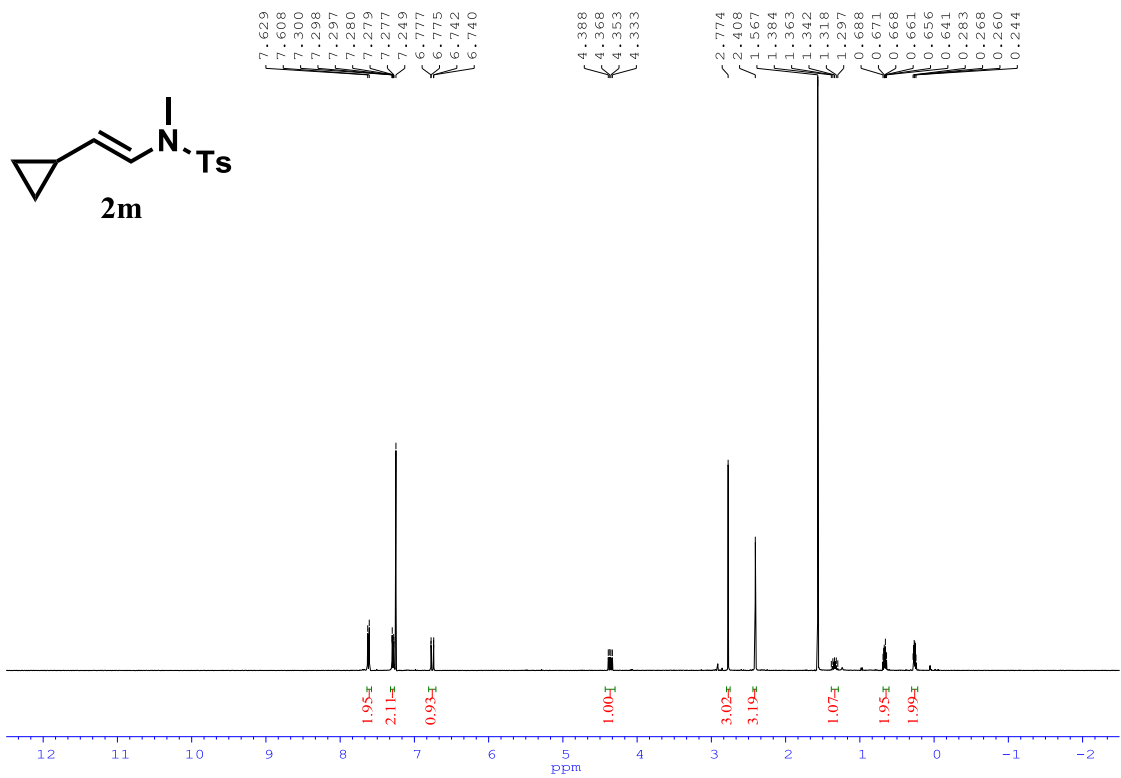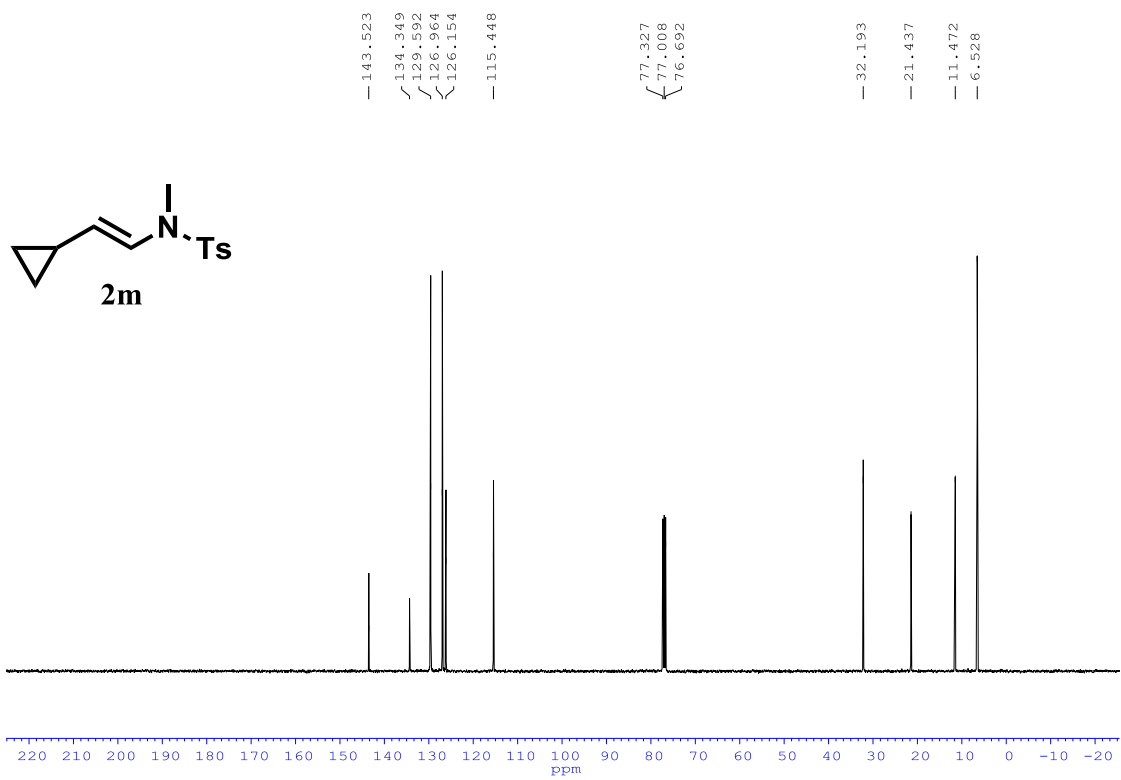



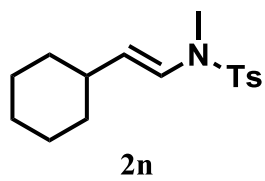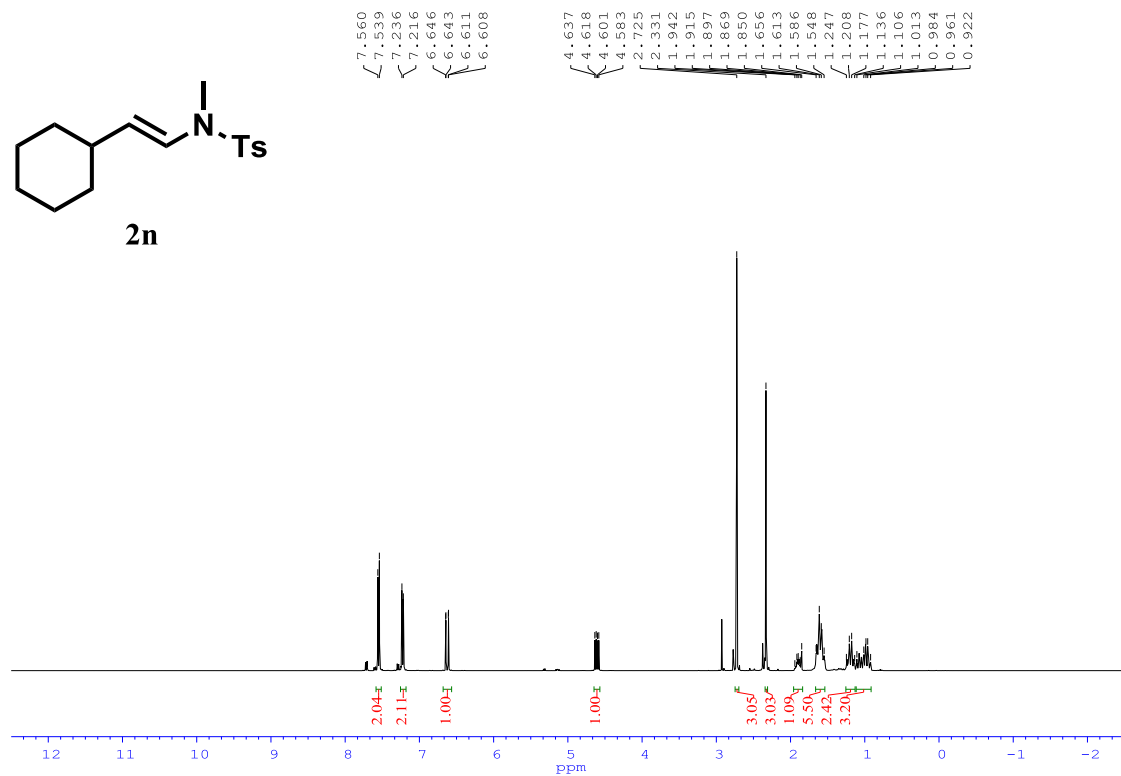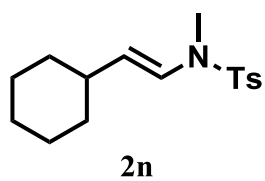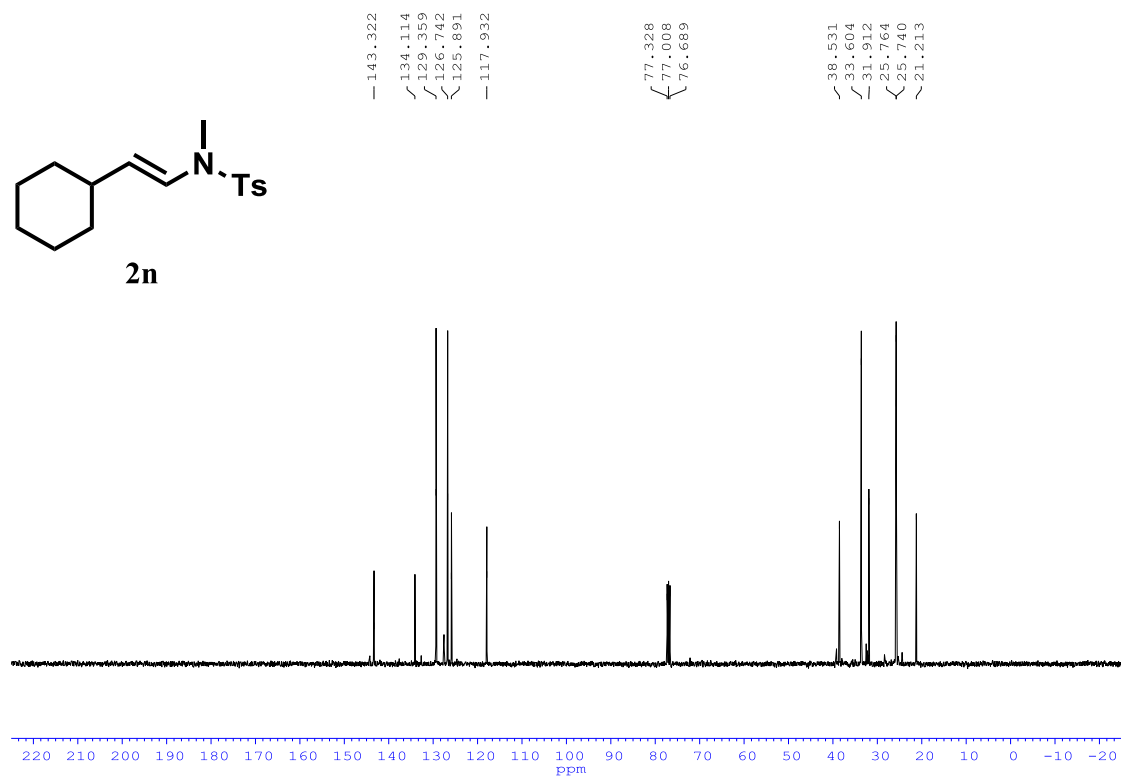

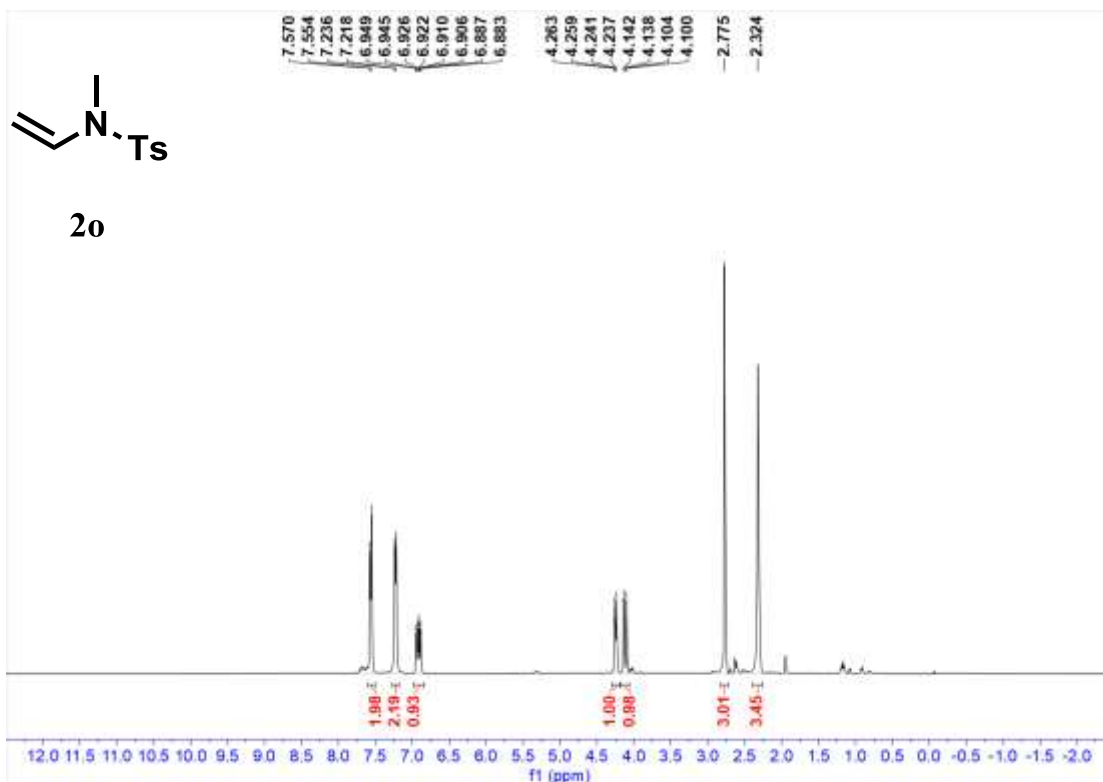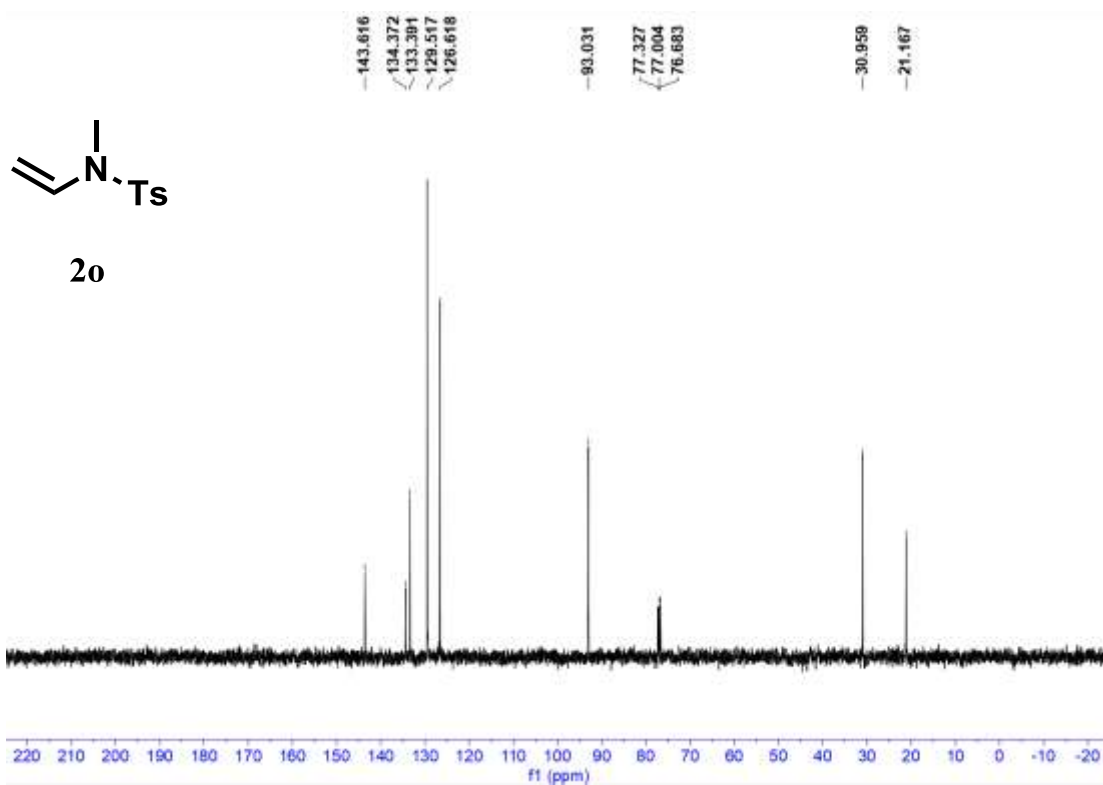

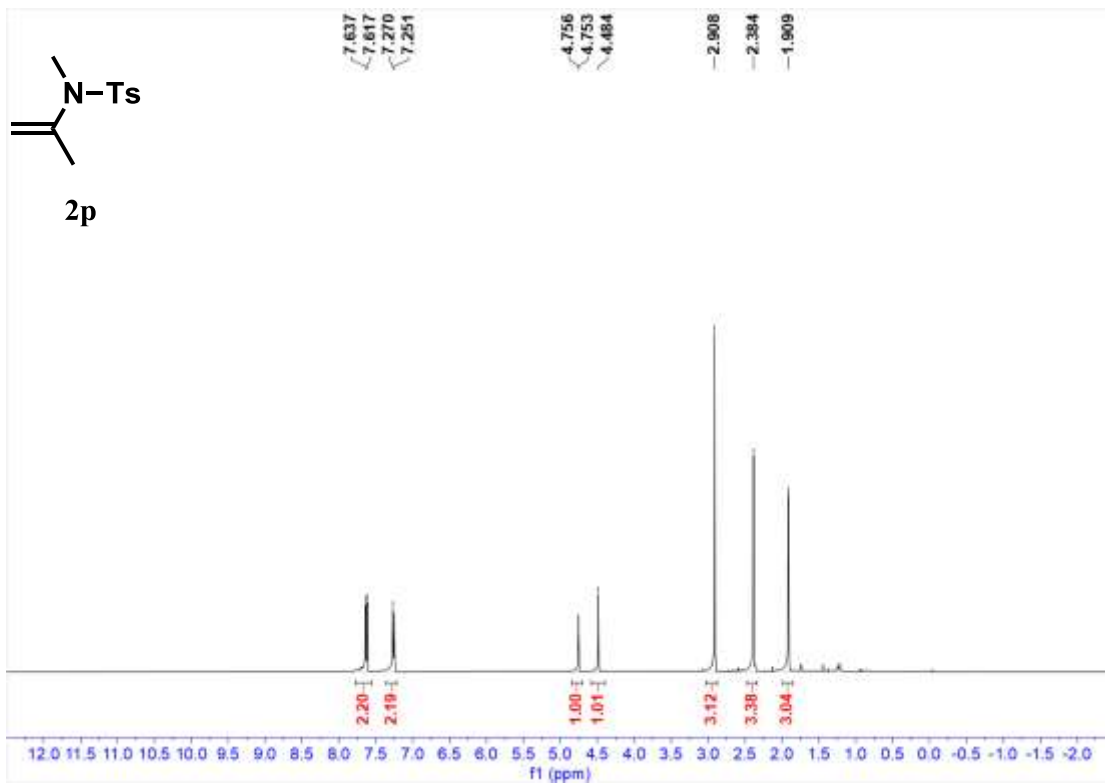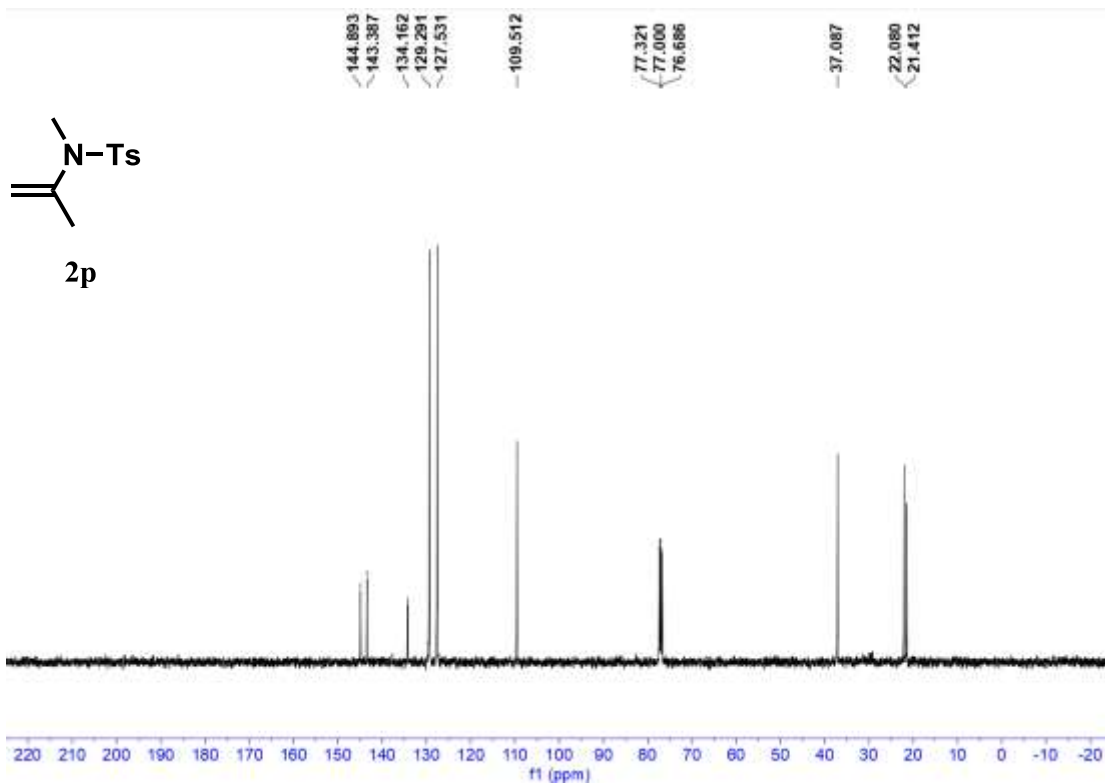

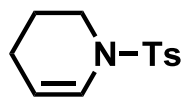

2q

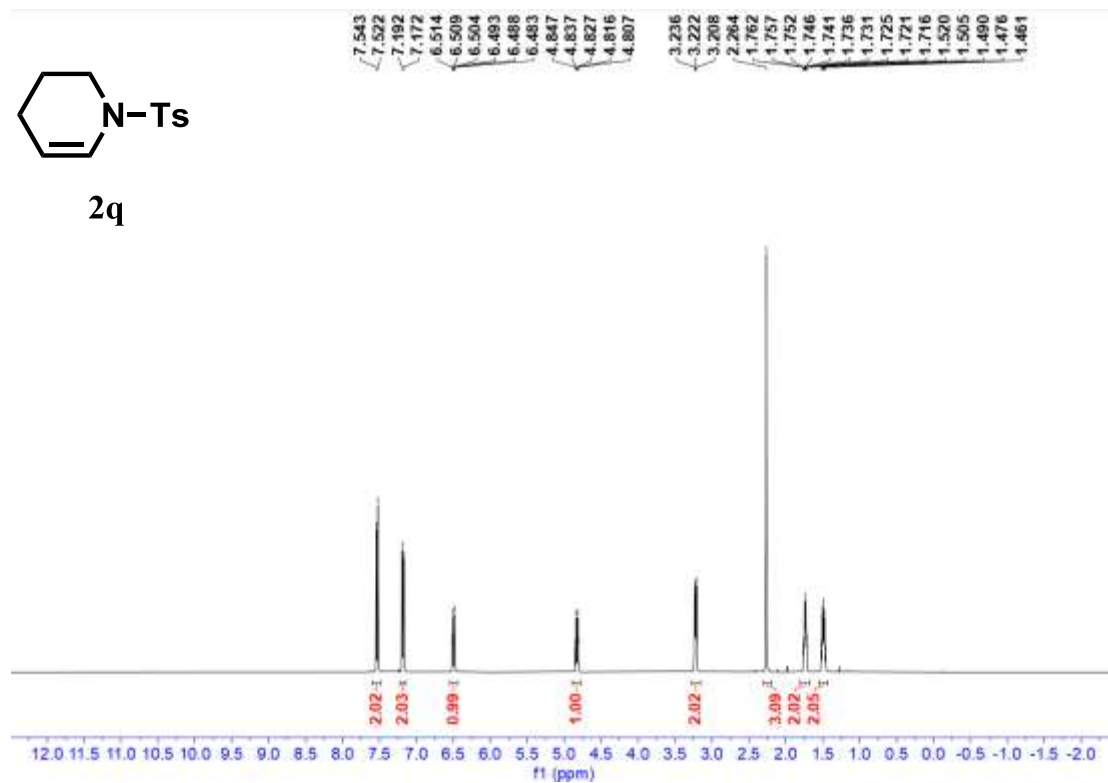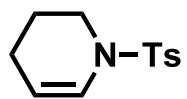

2q

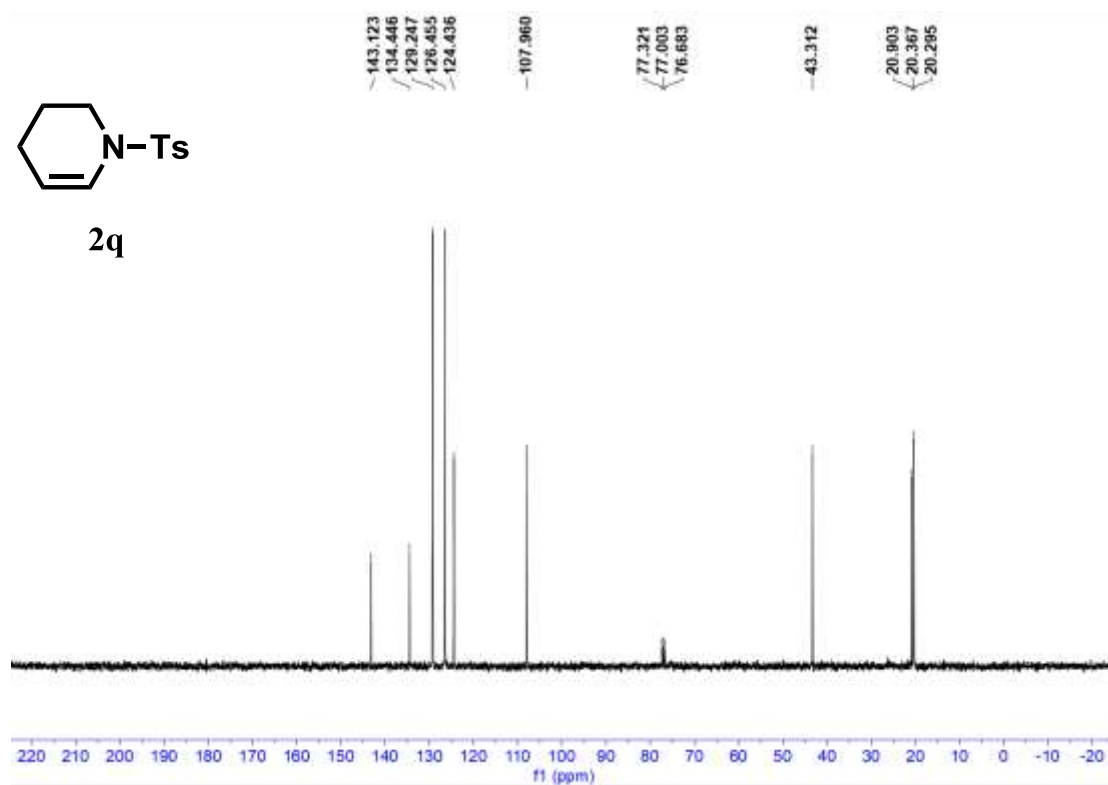

## NMR Spectra for vinyl cyclopropylamides:

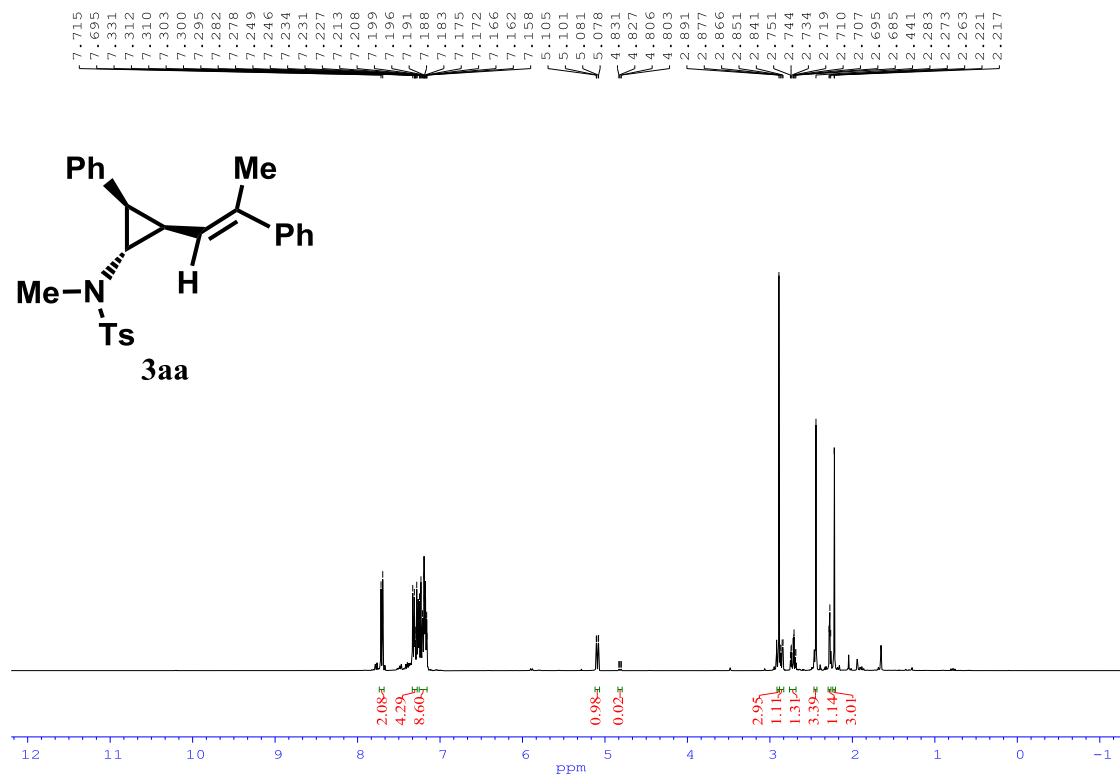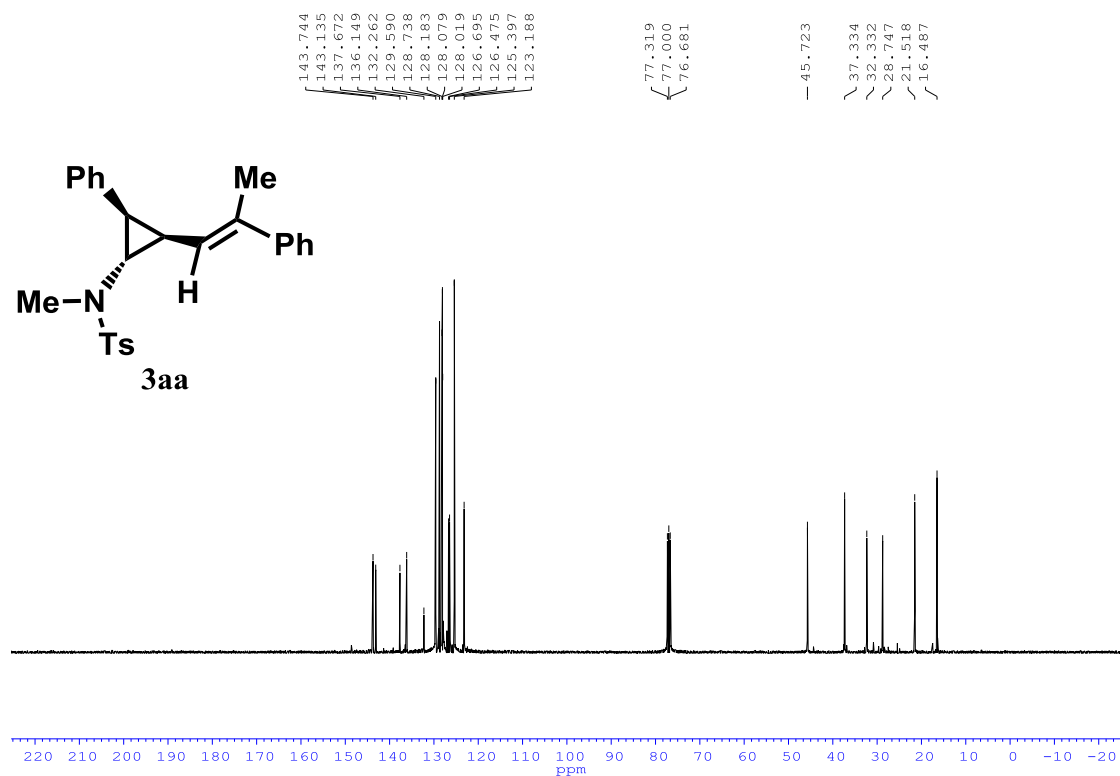

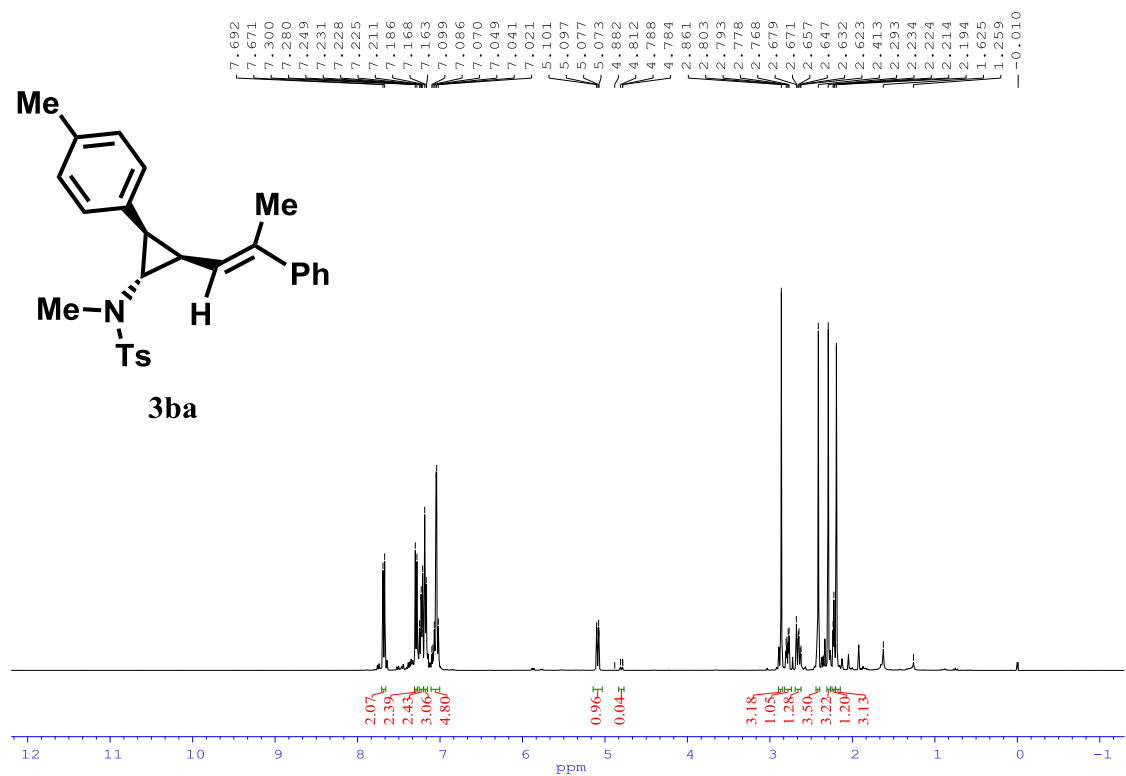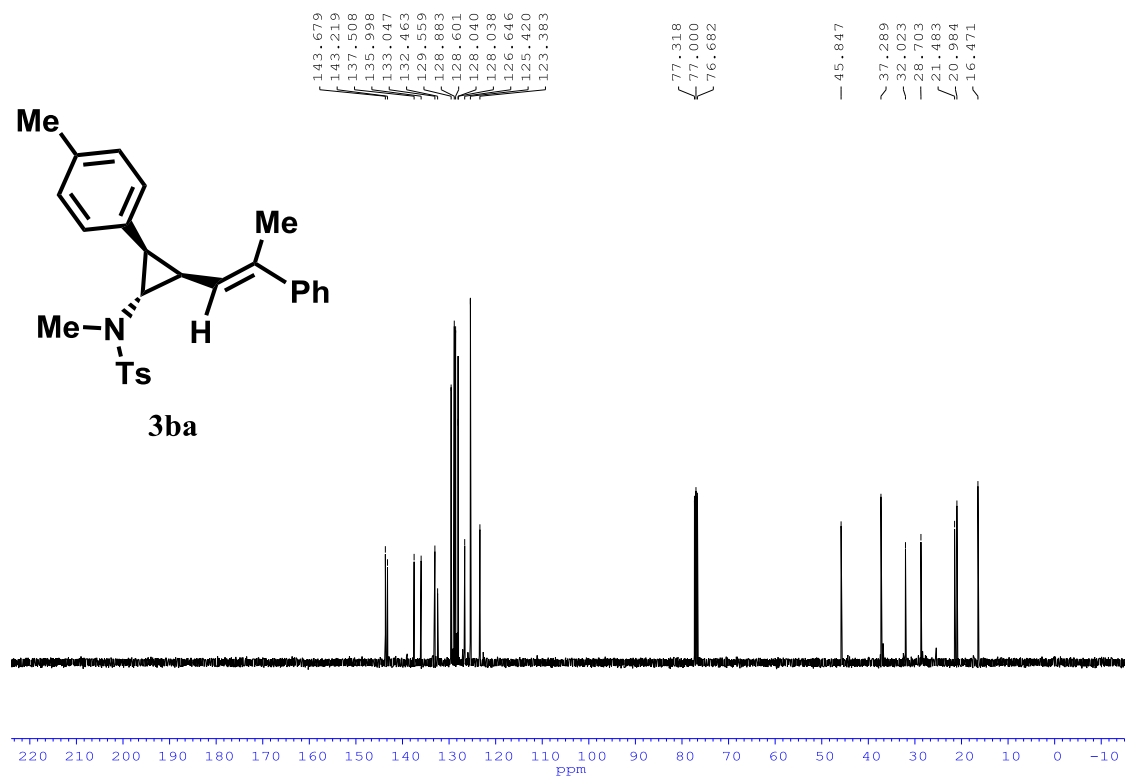

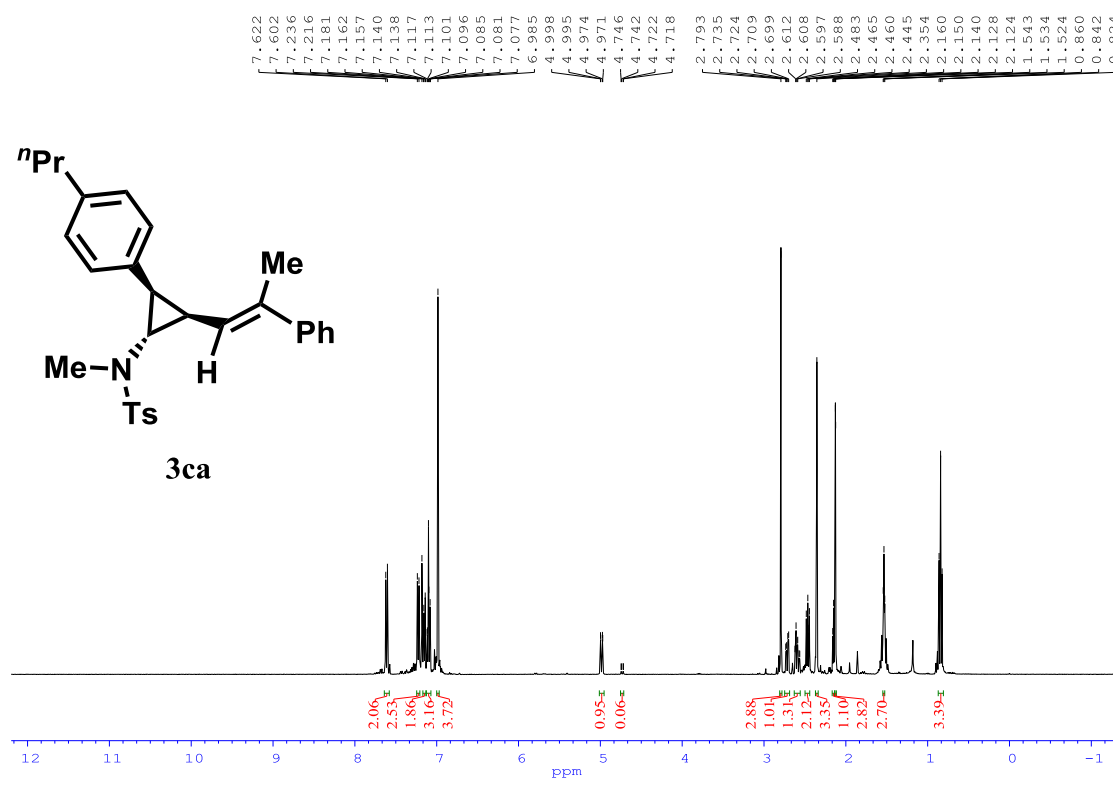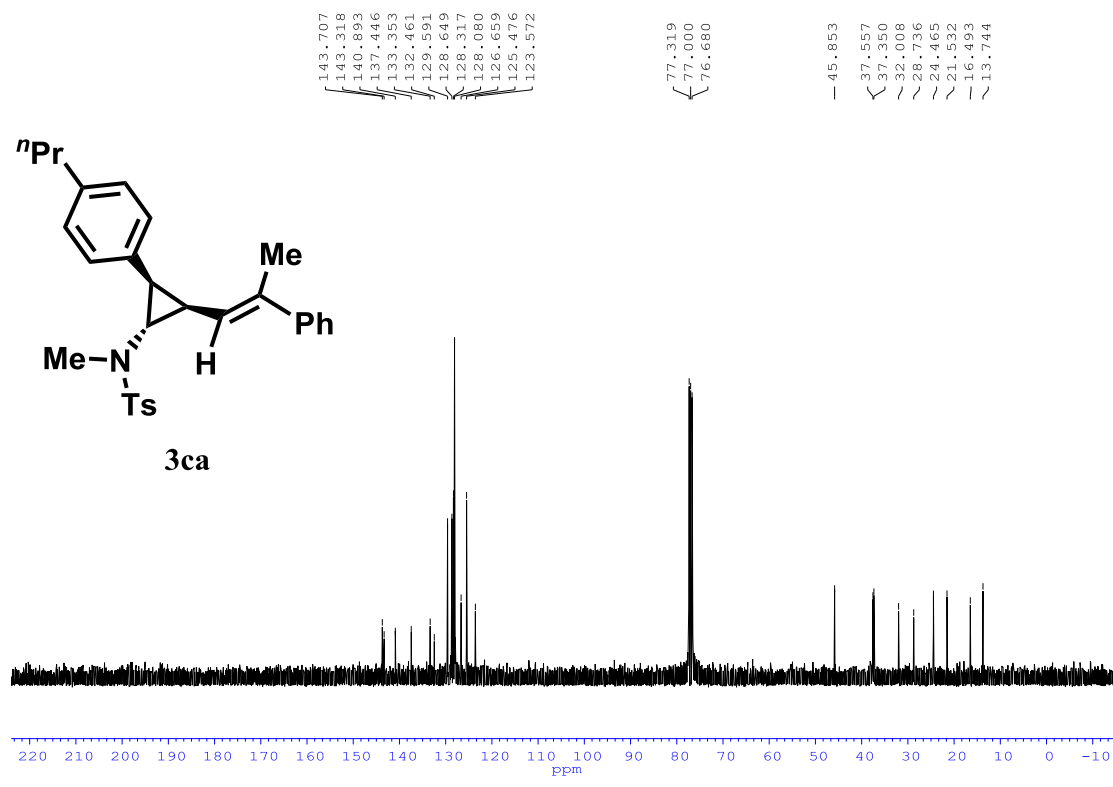

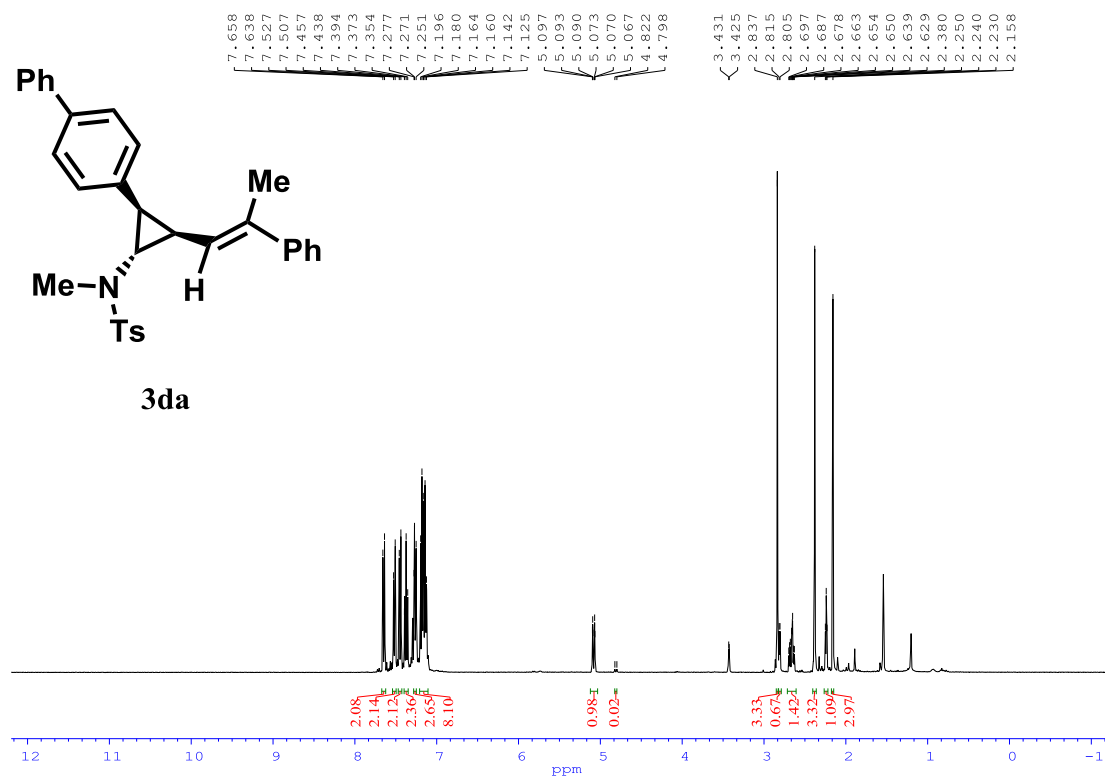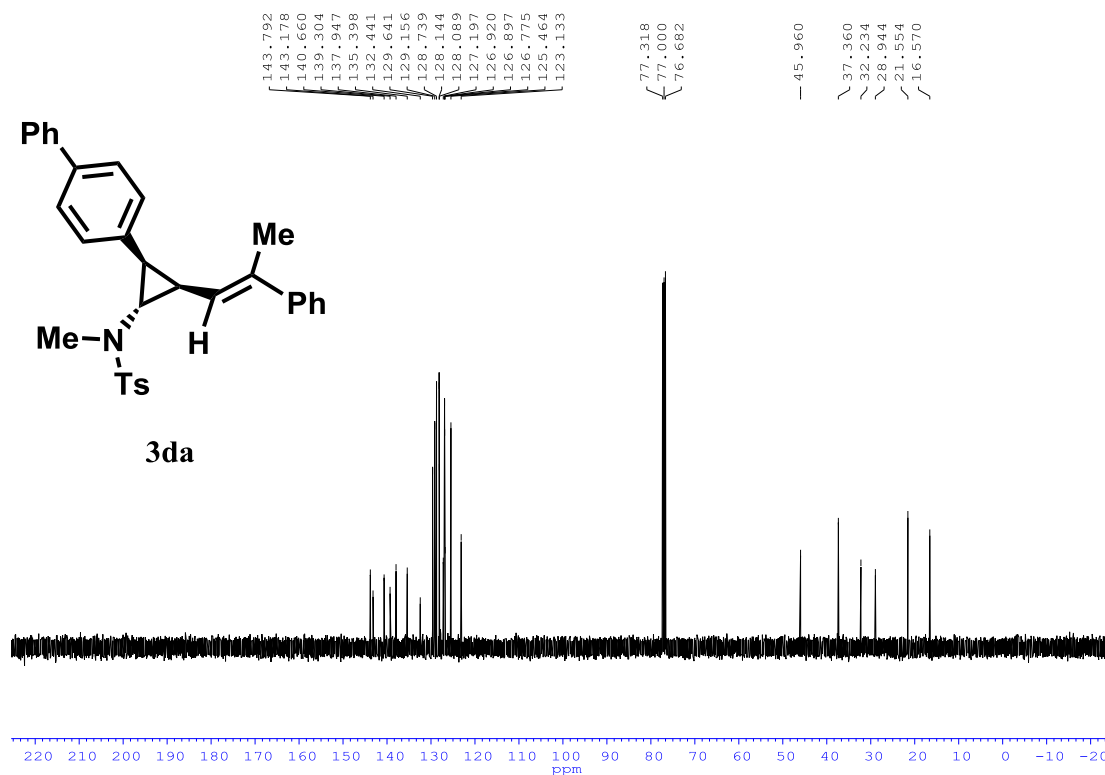





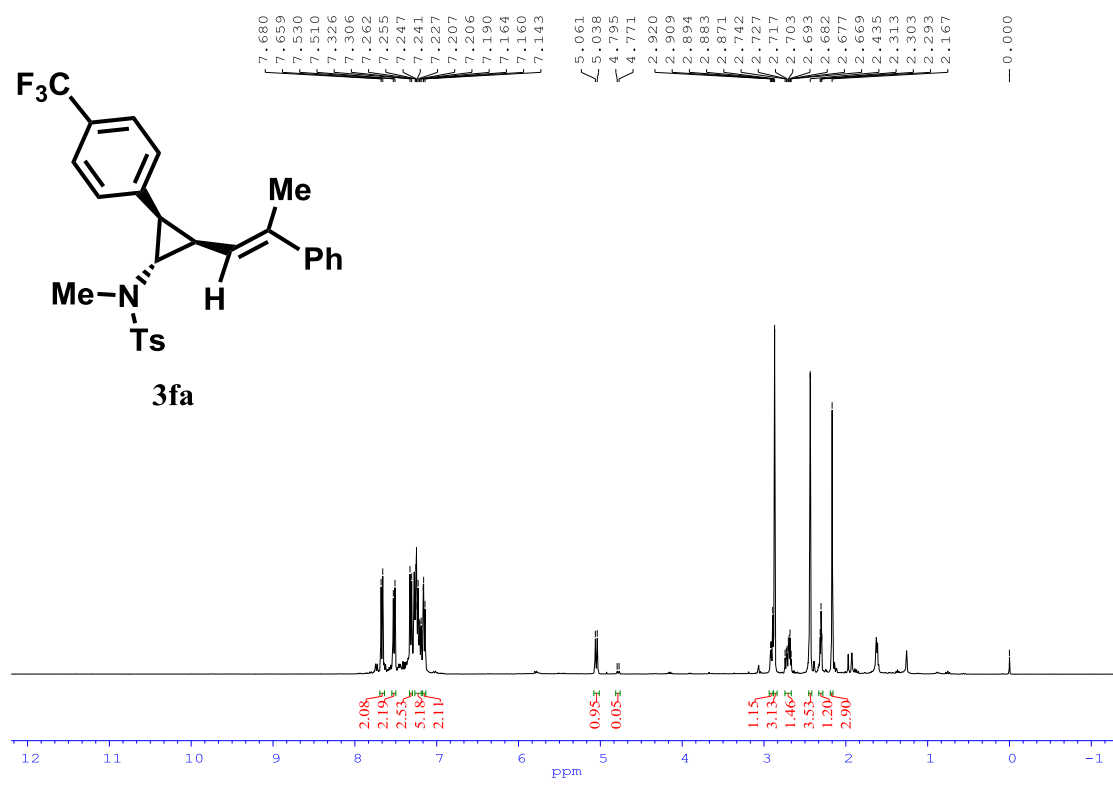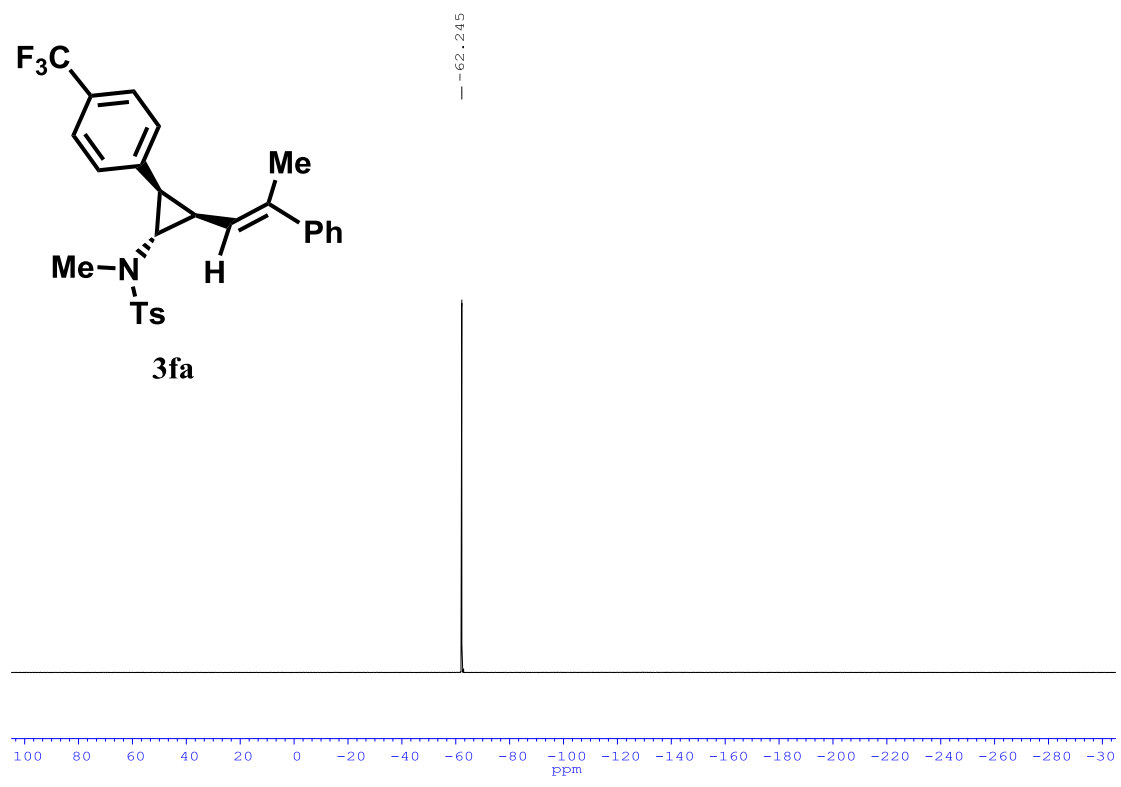

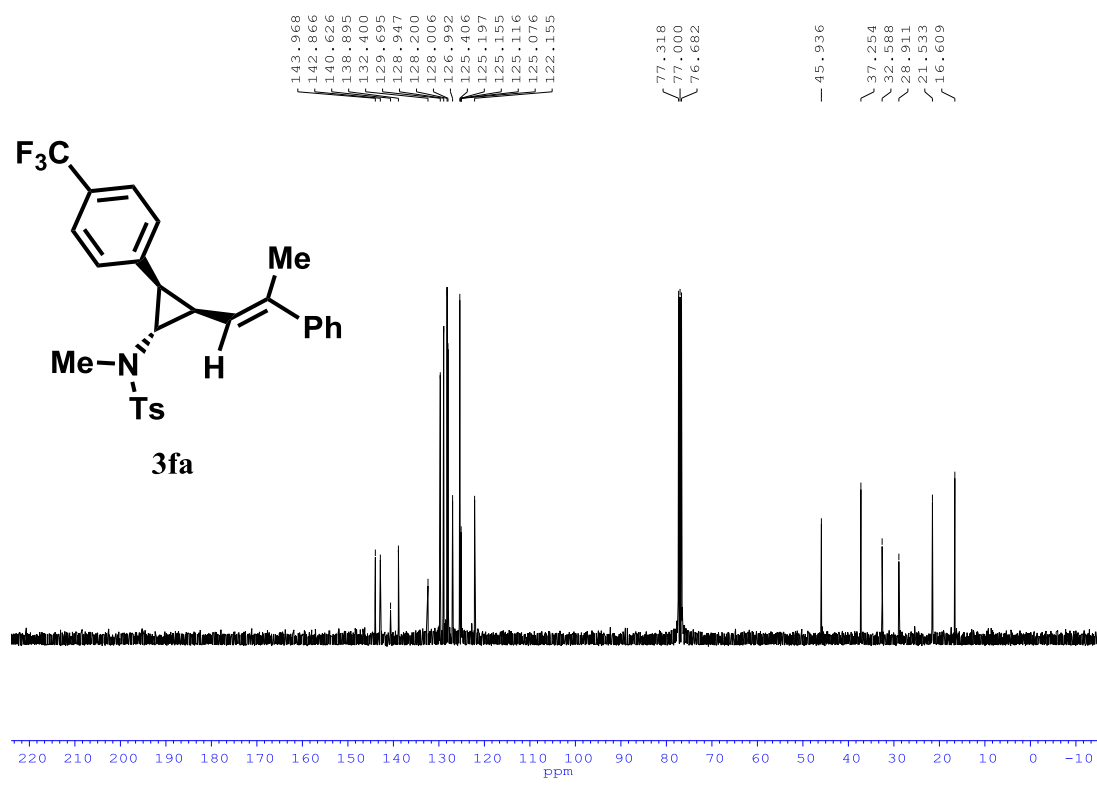

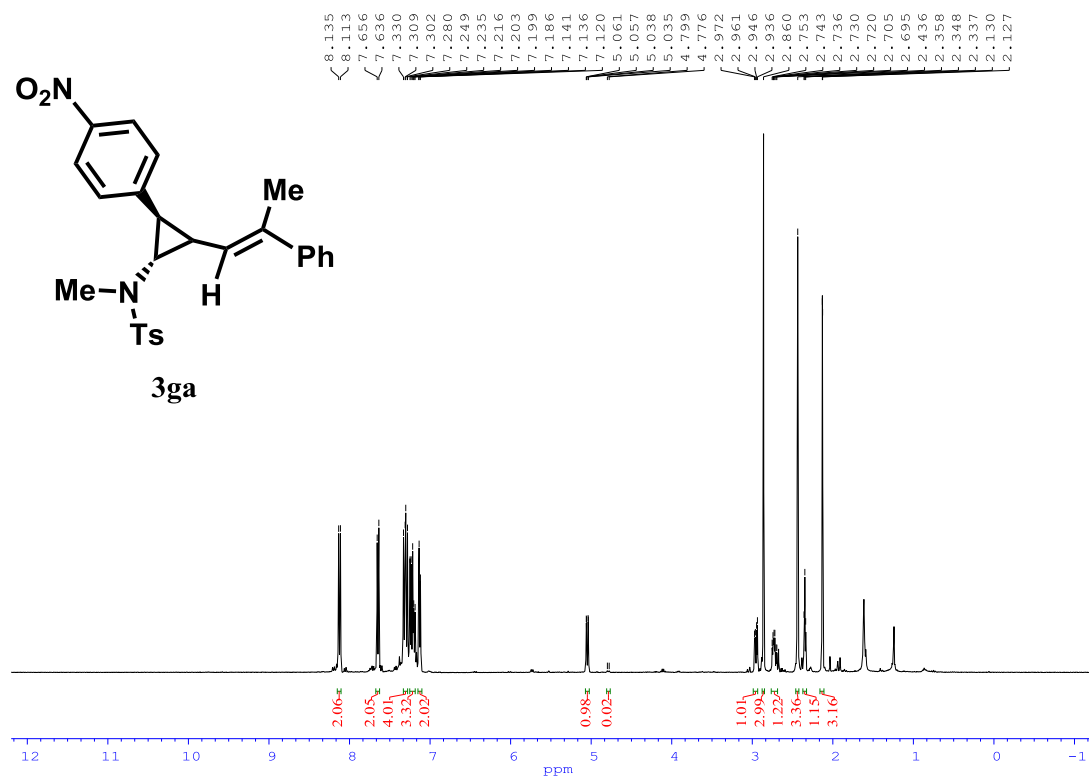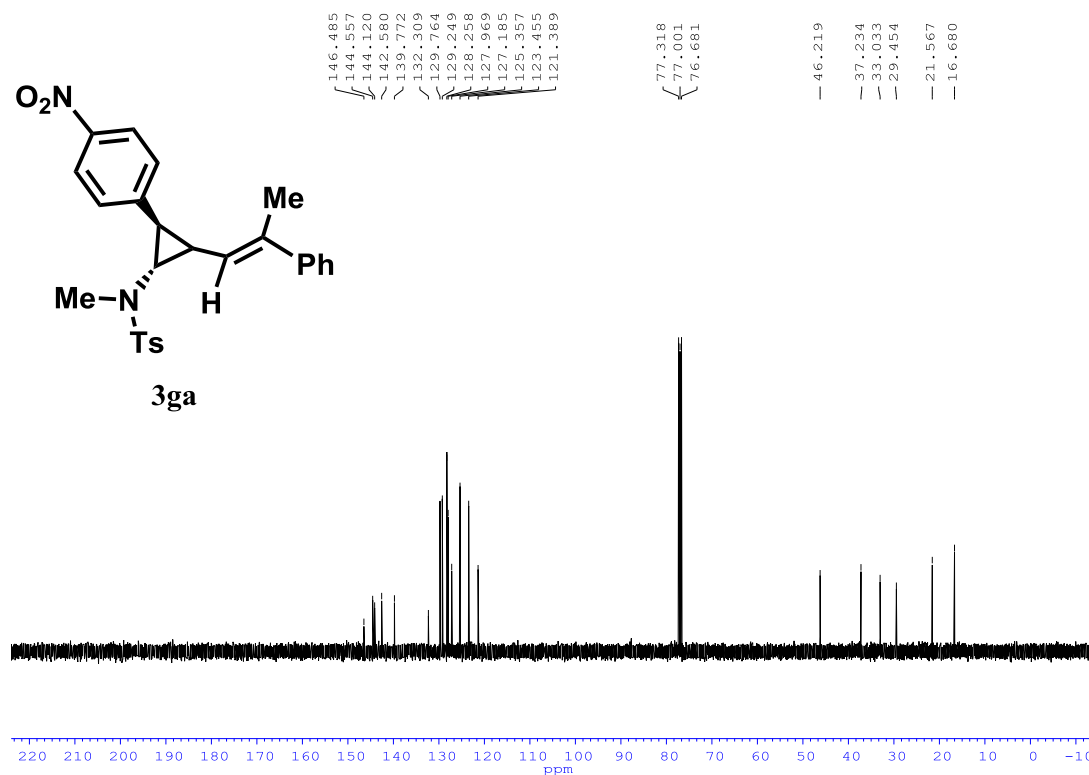

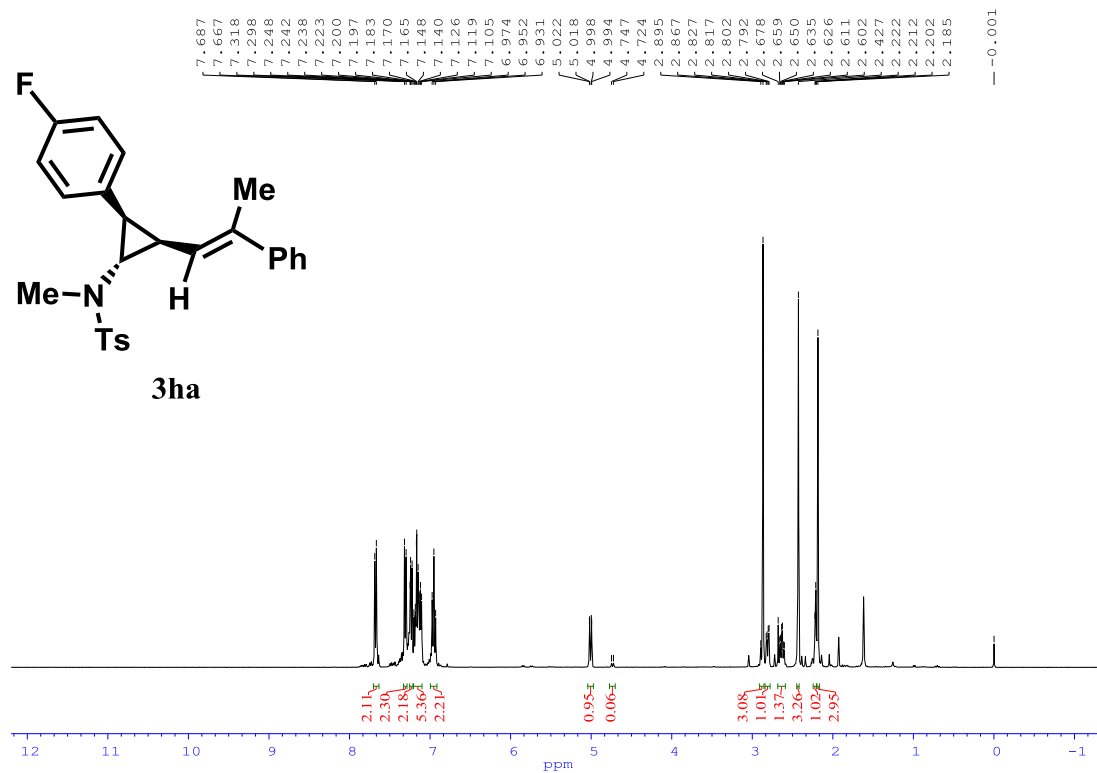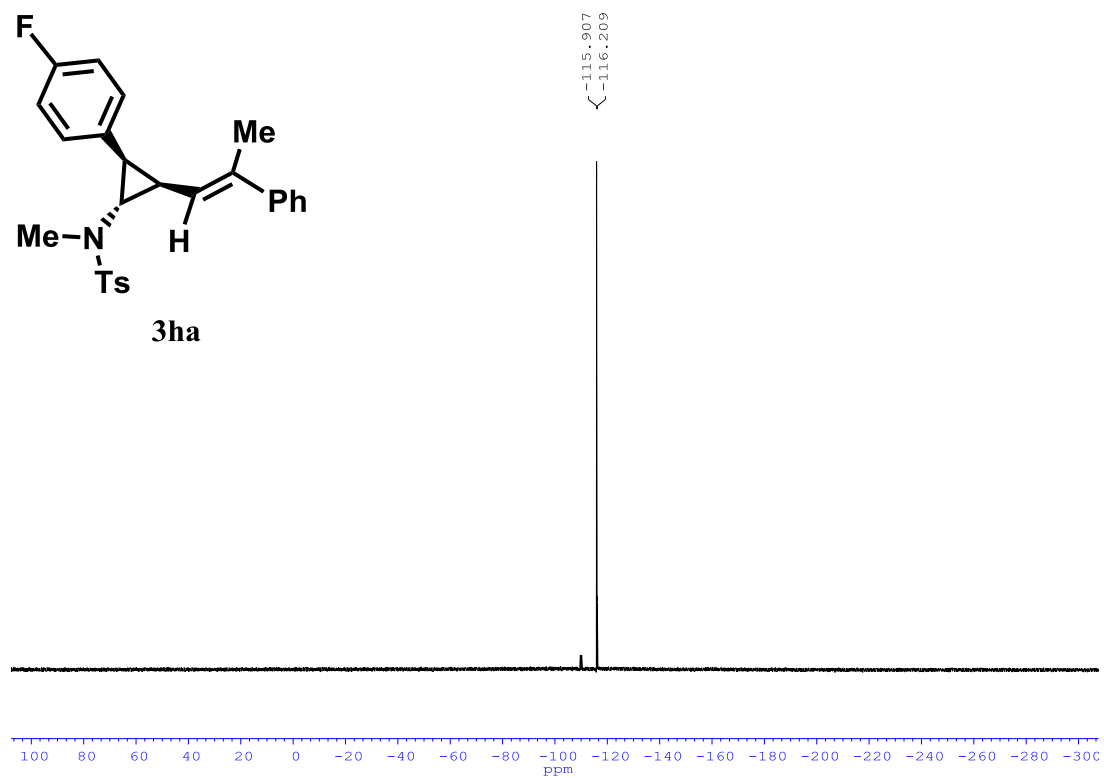

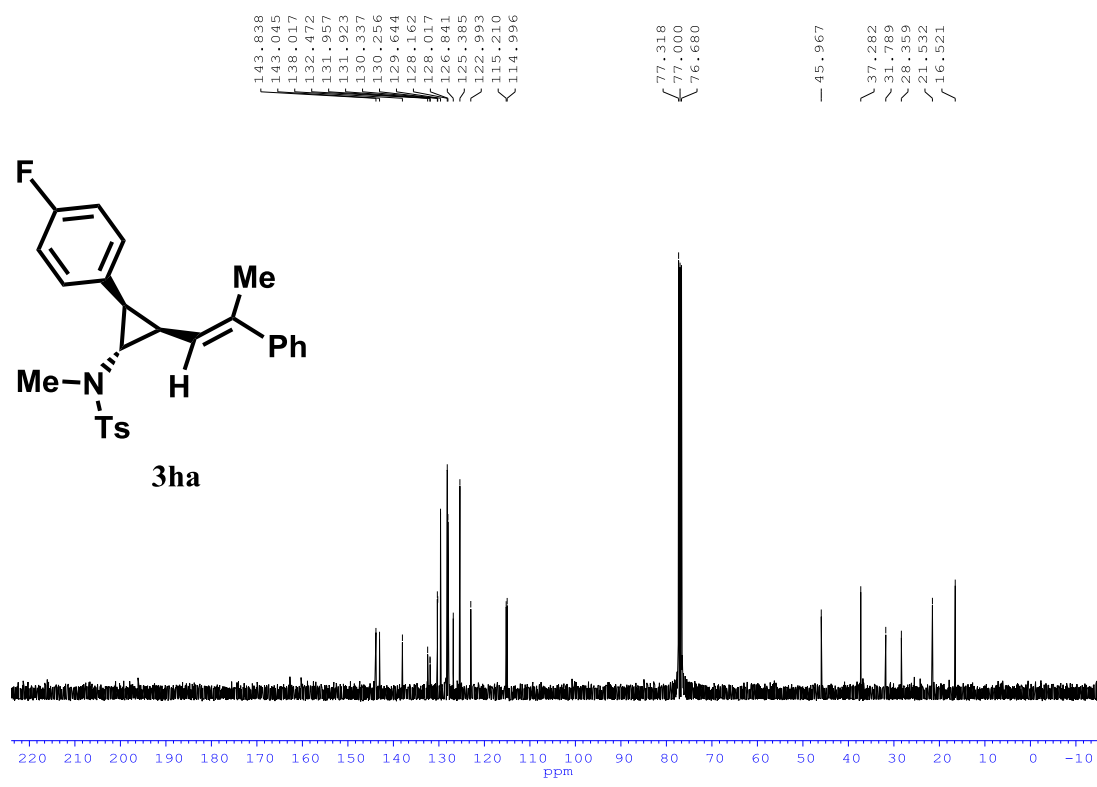

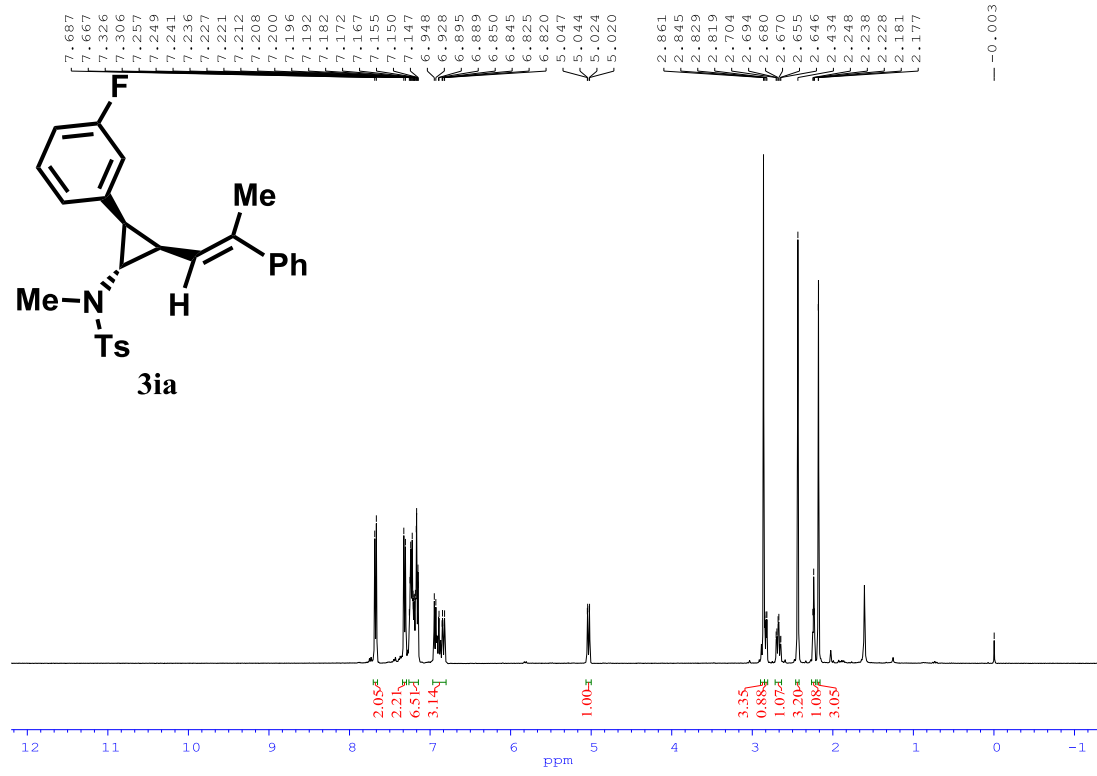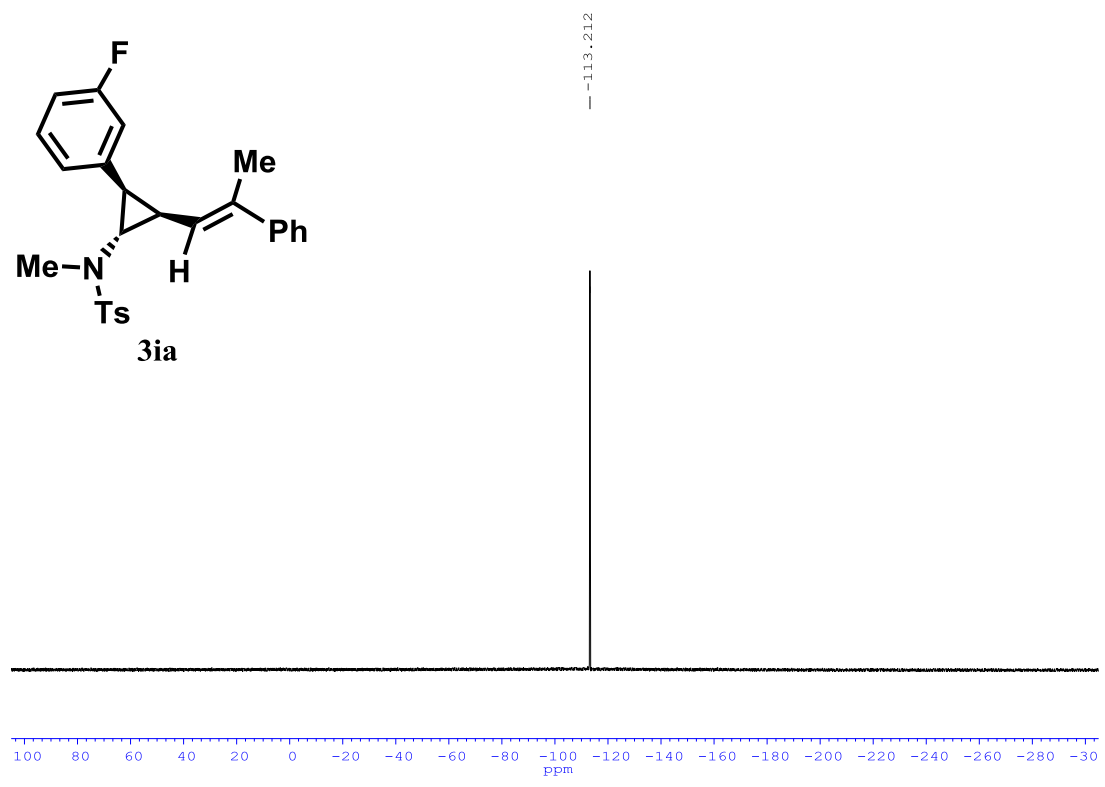

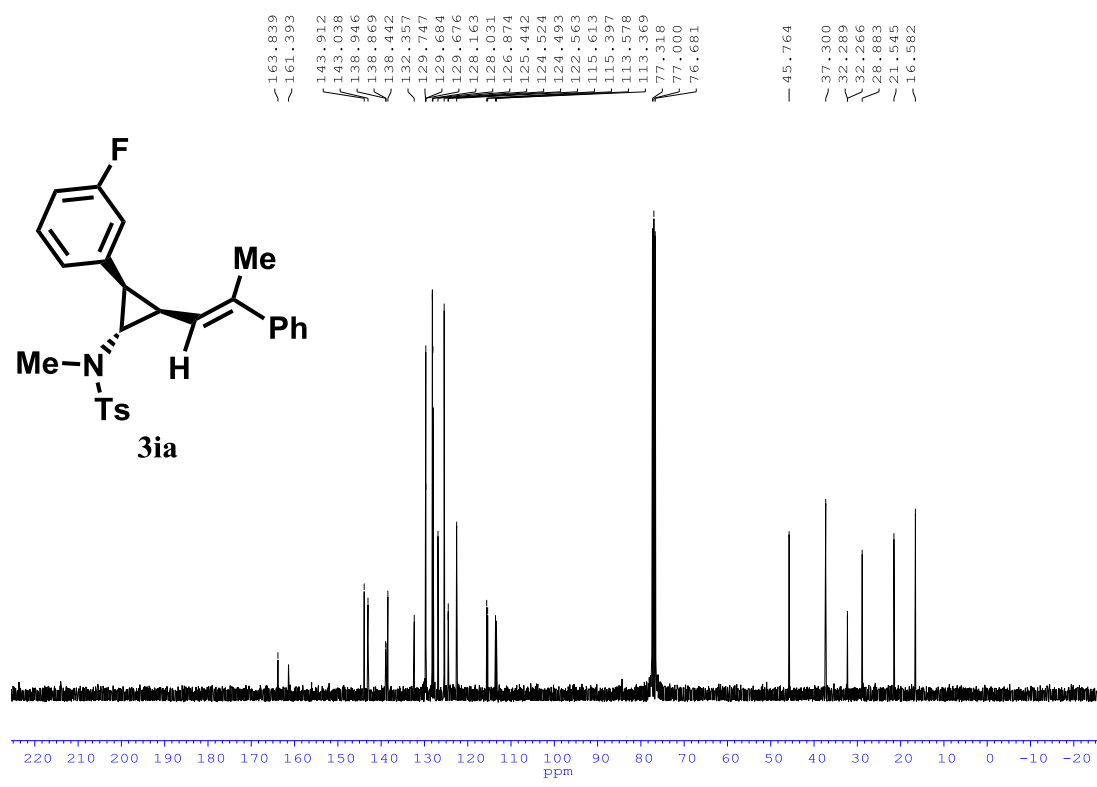



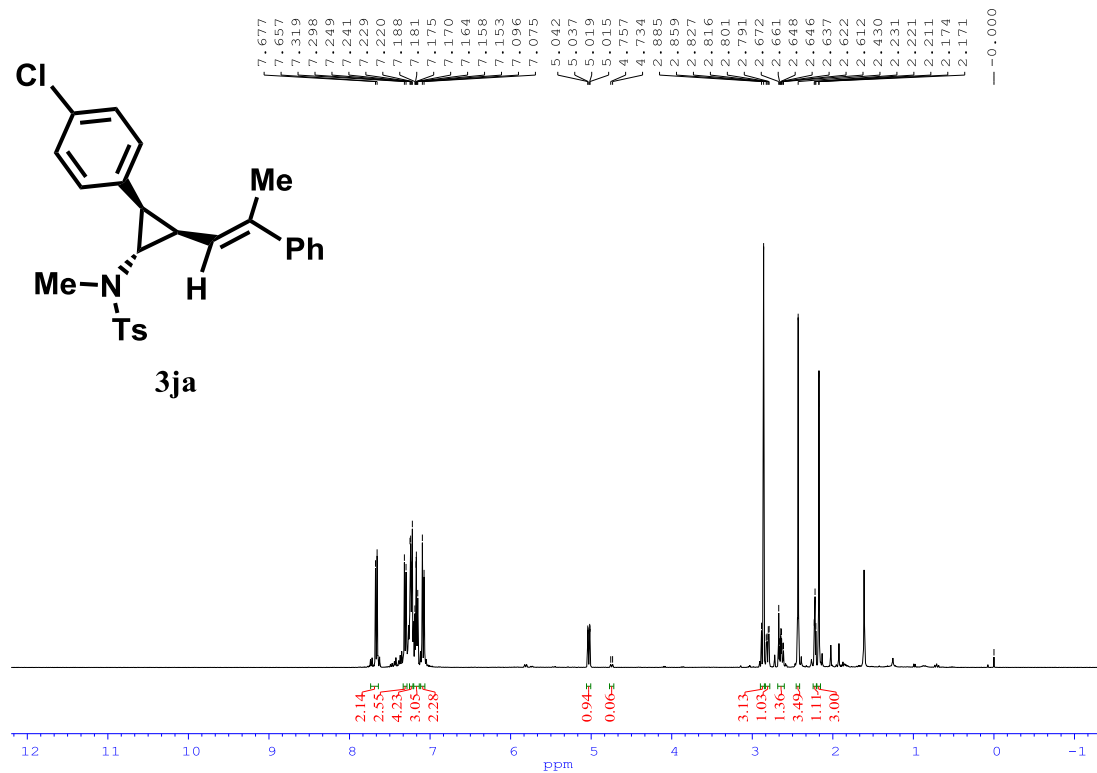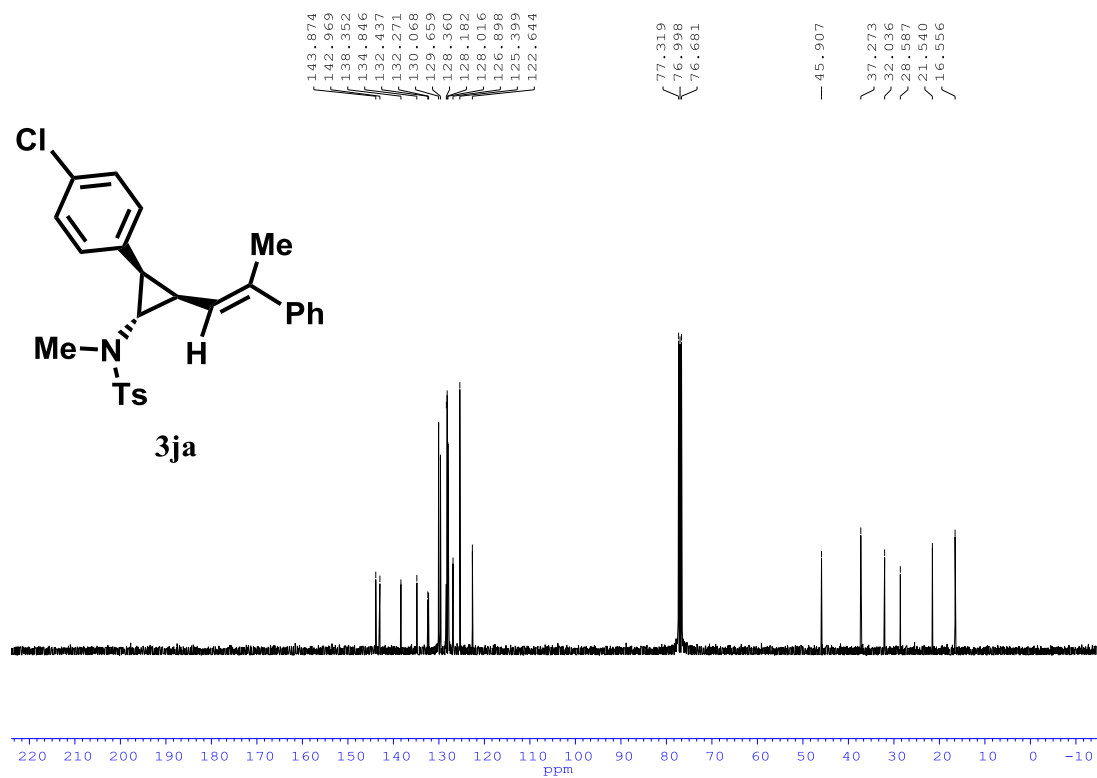

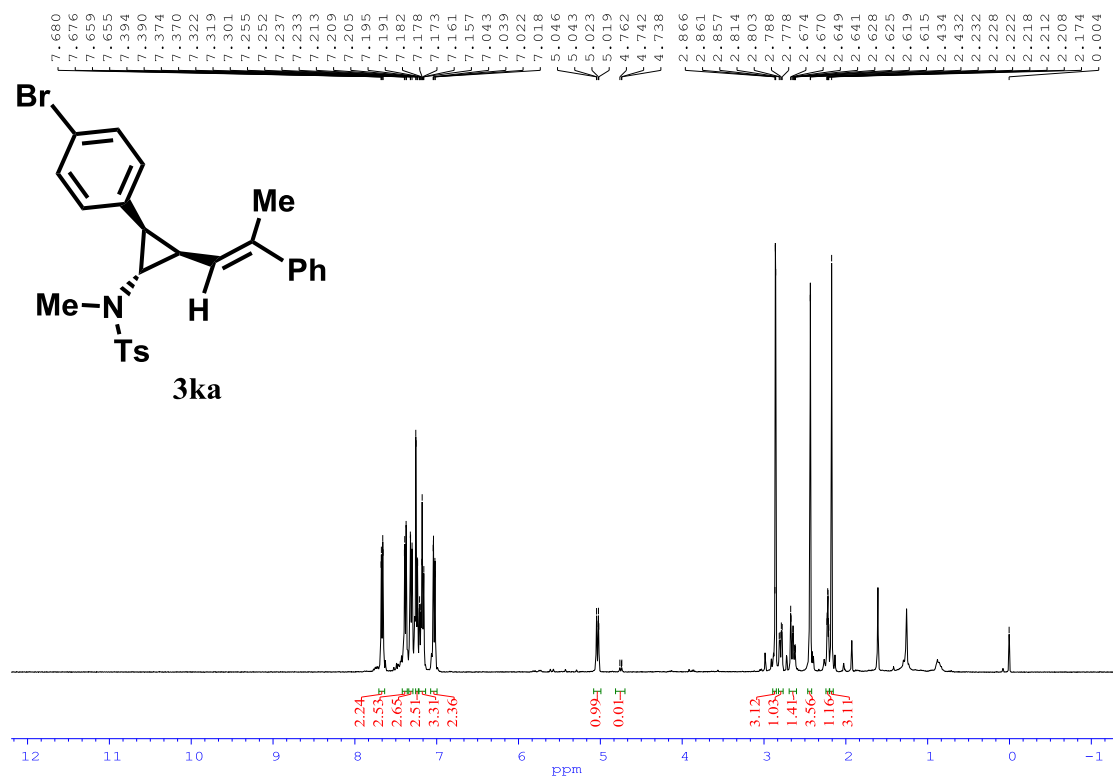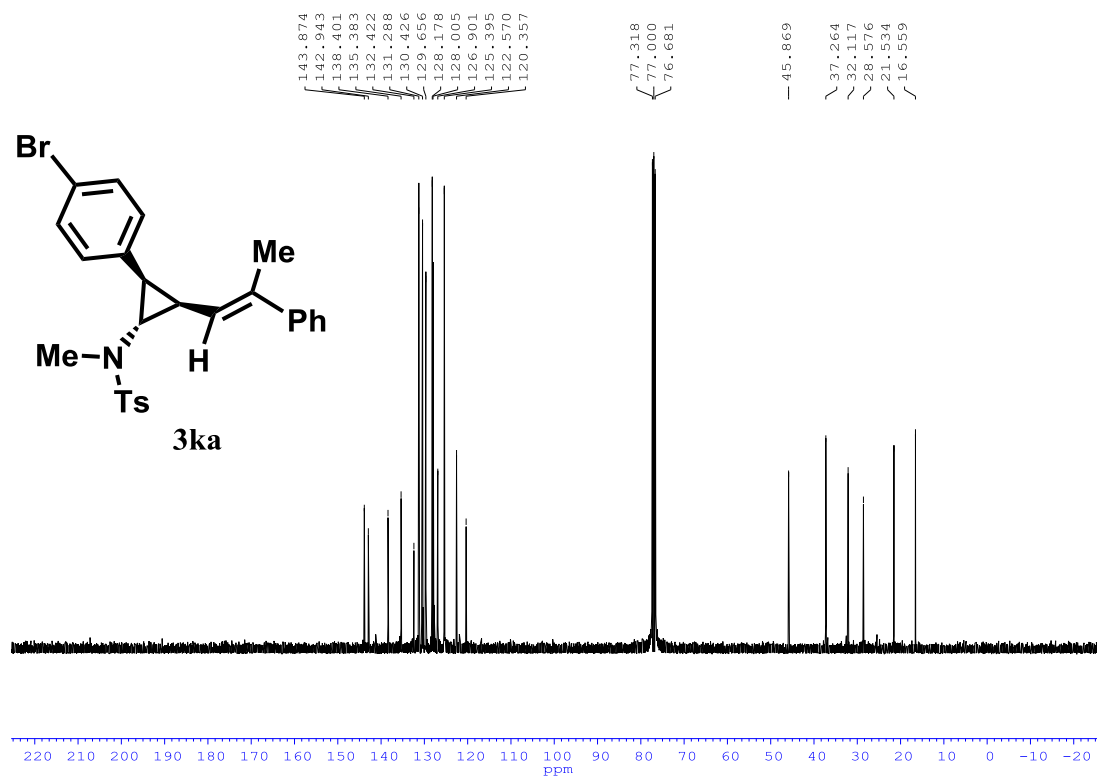

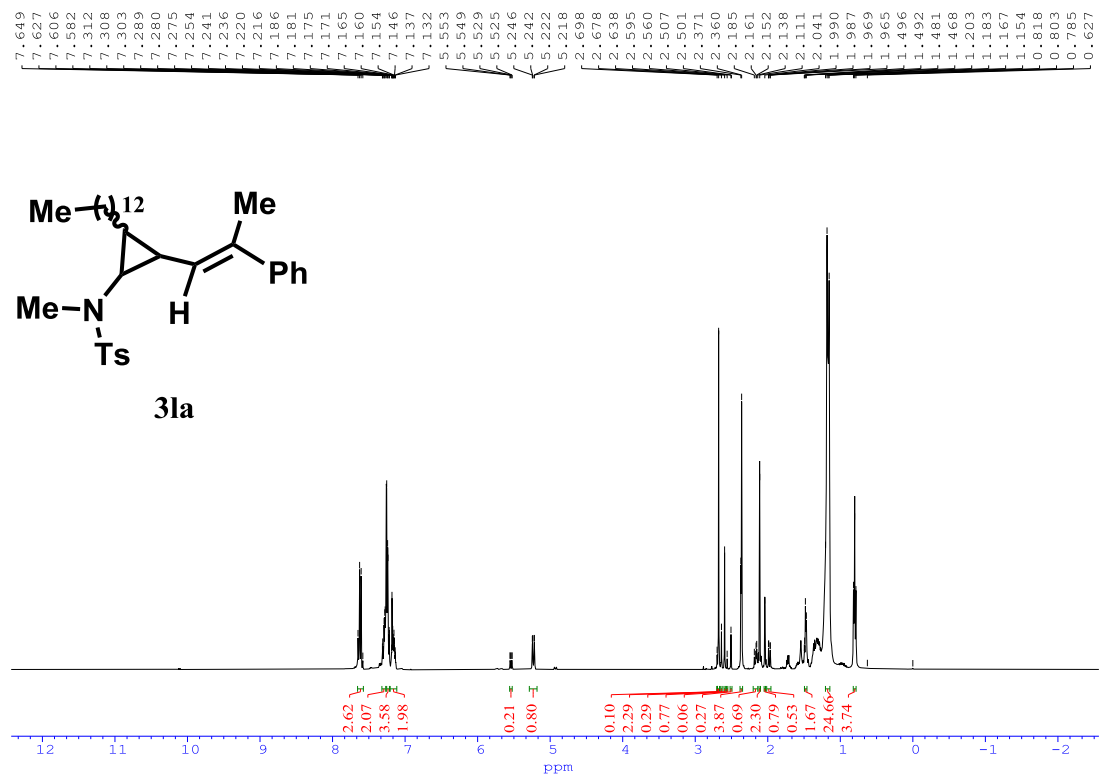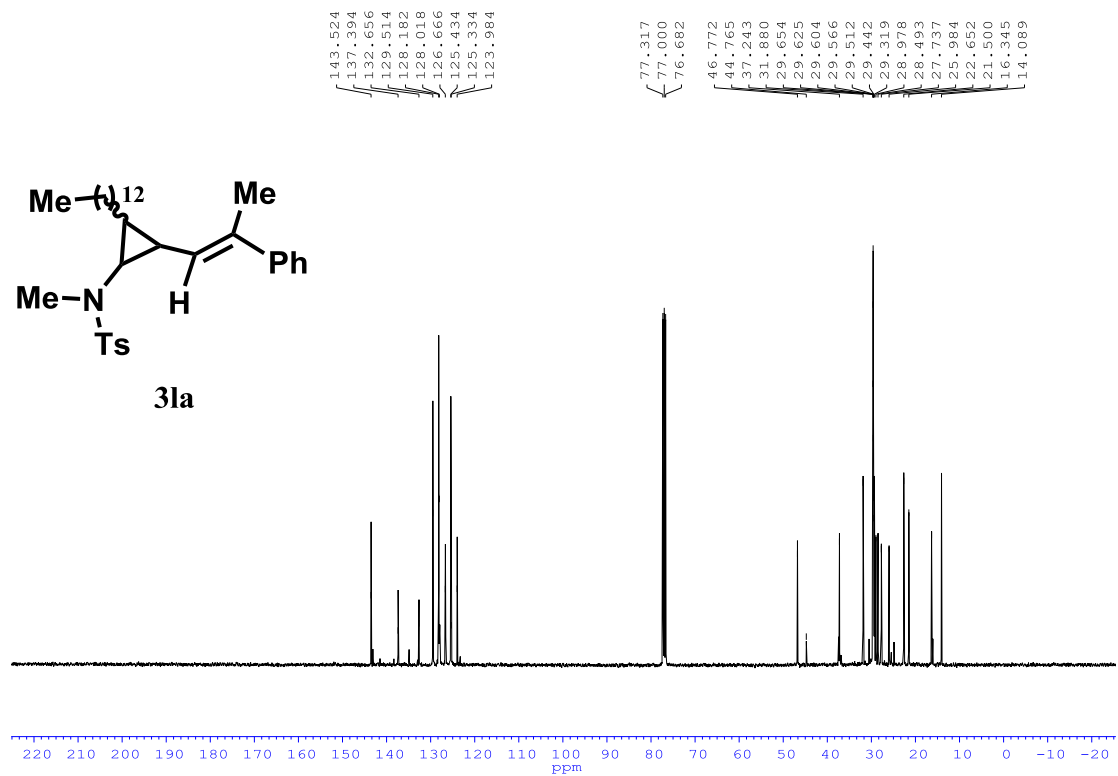

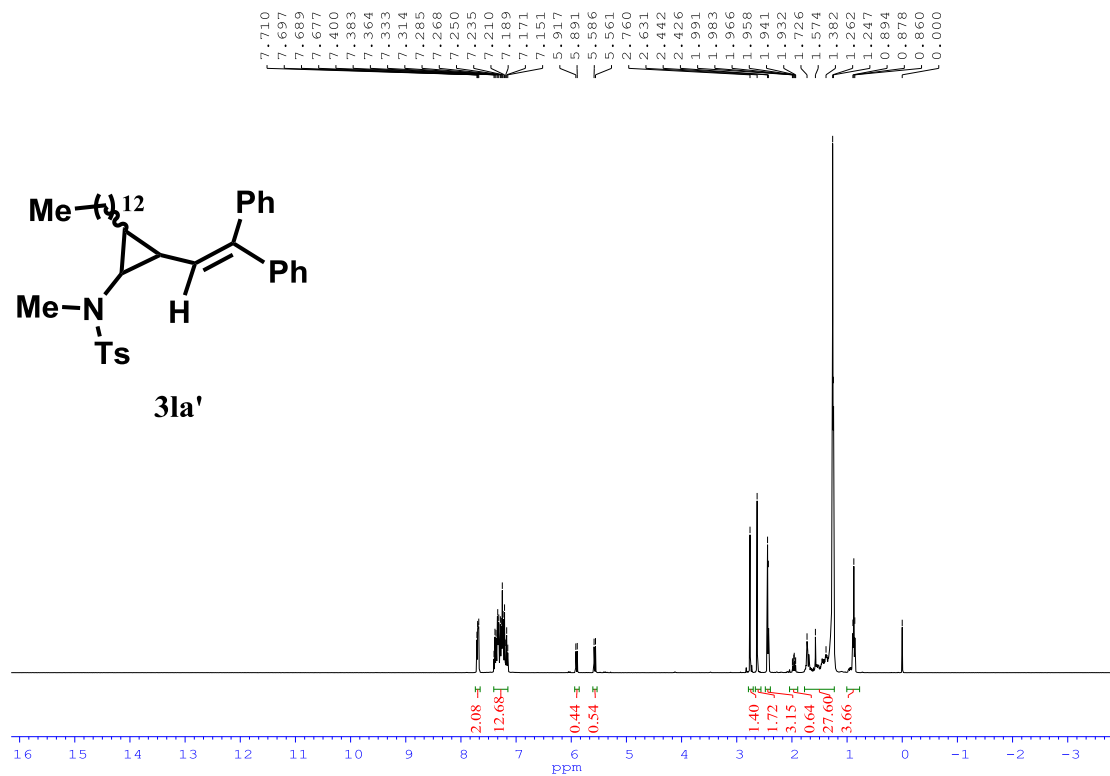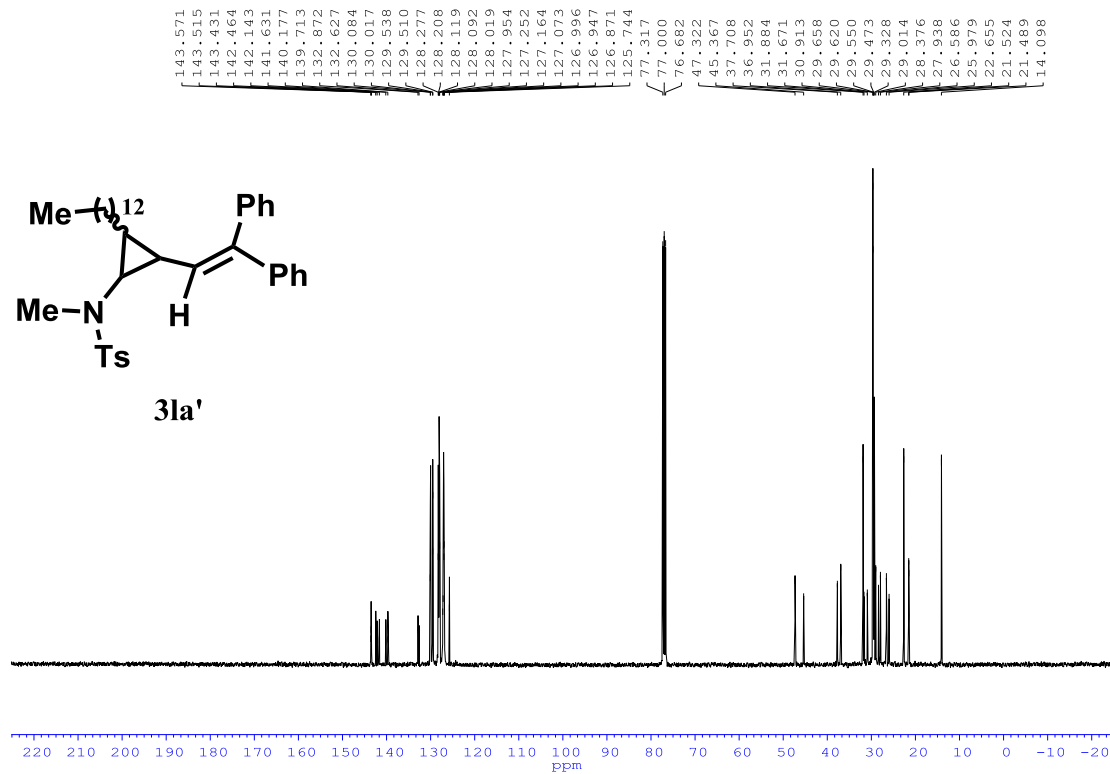

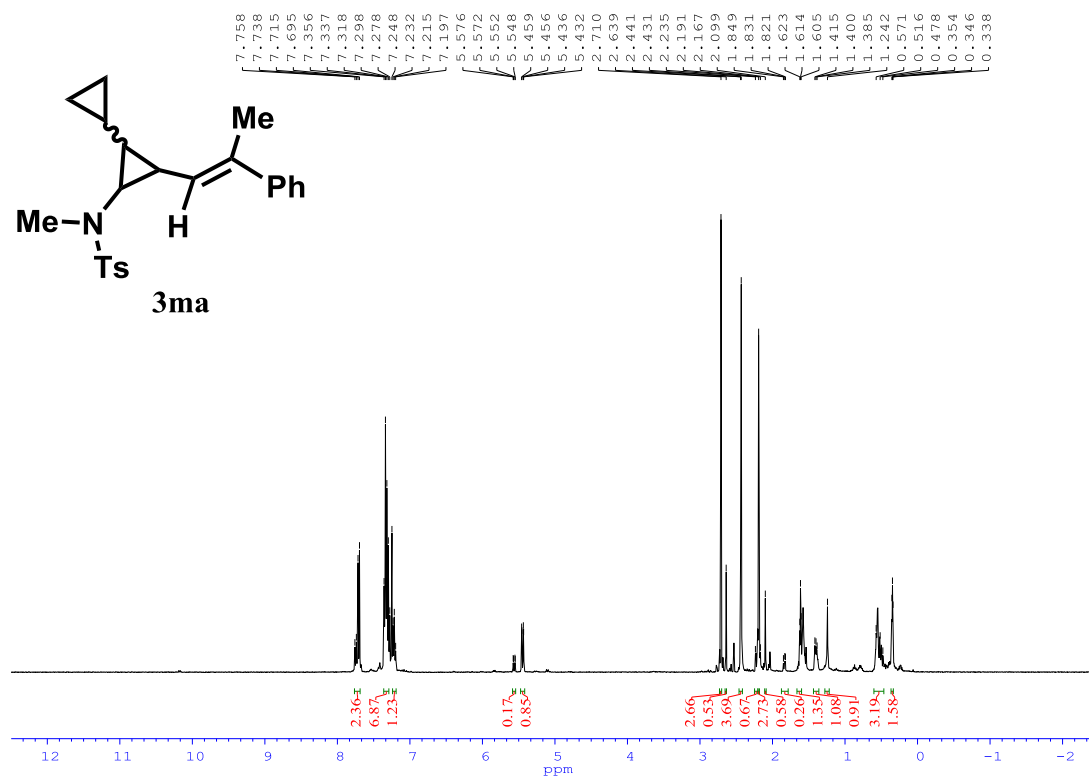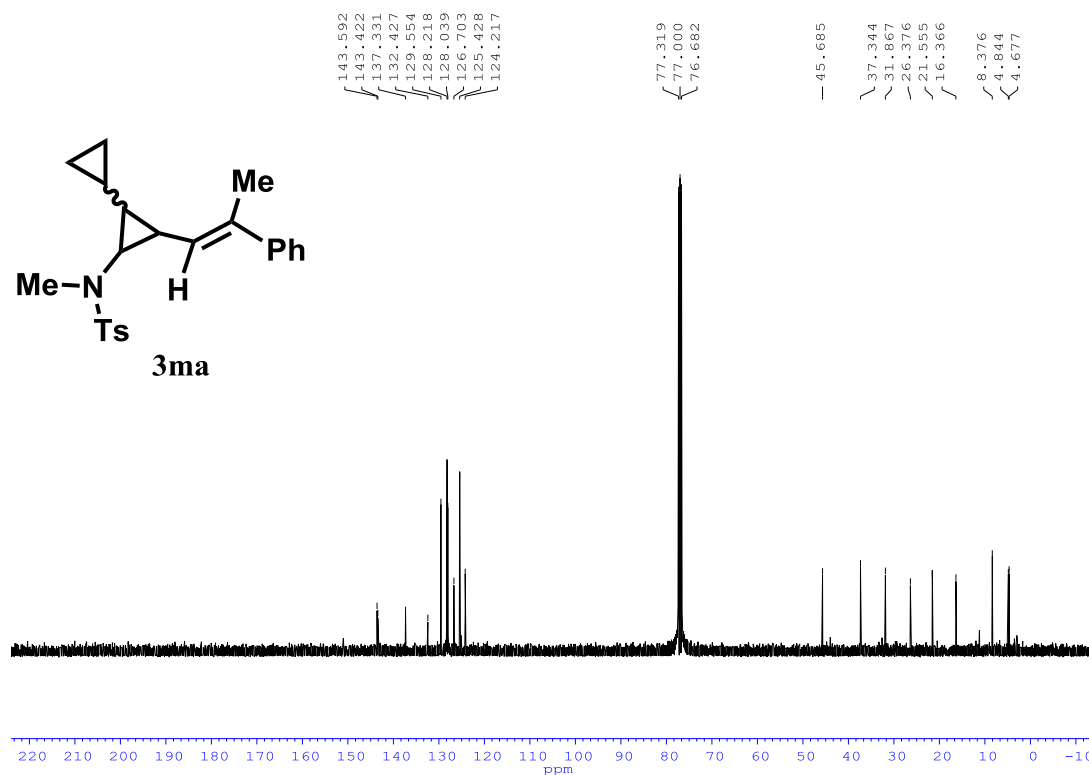

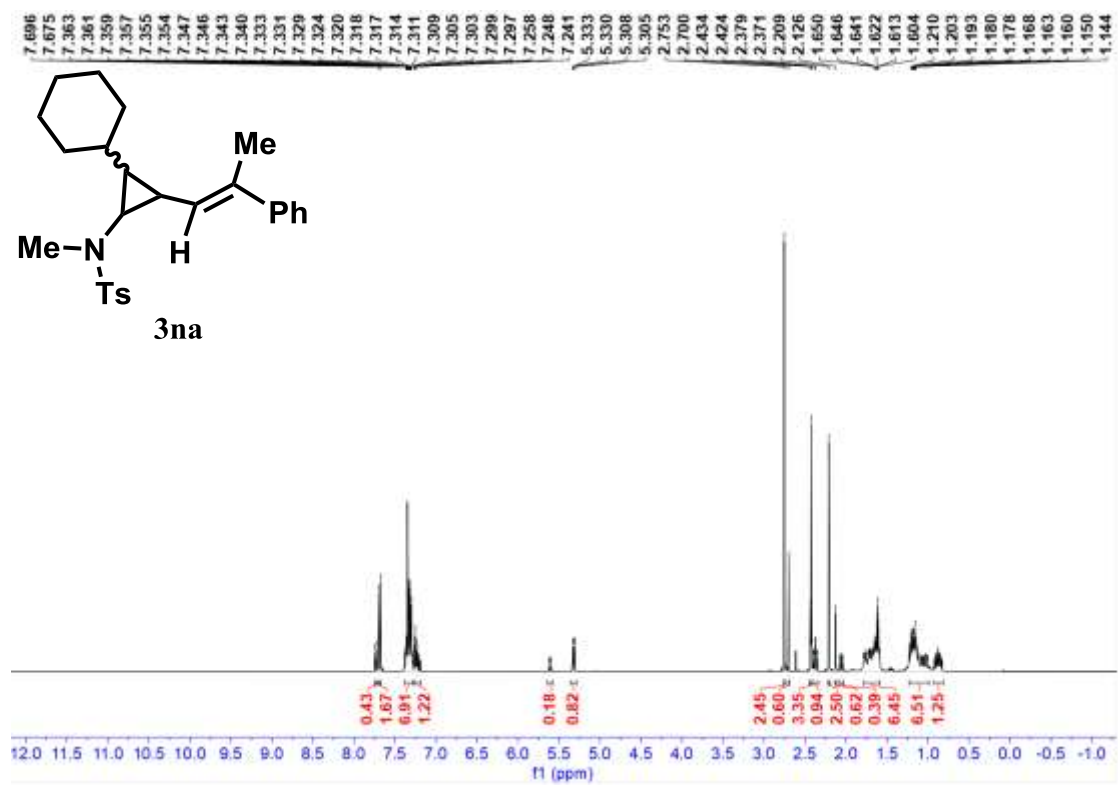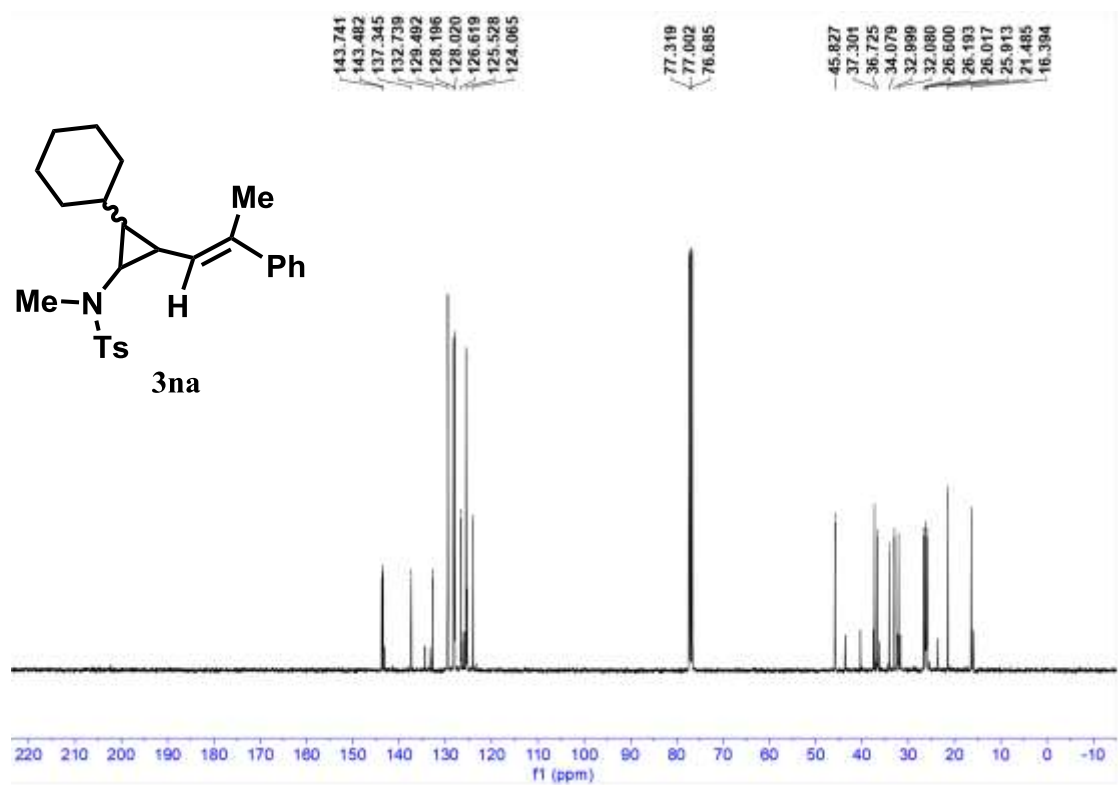

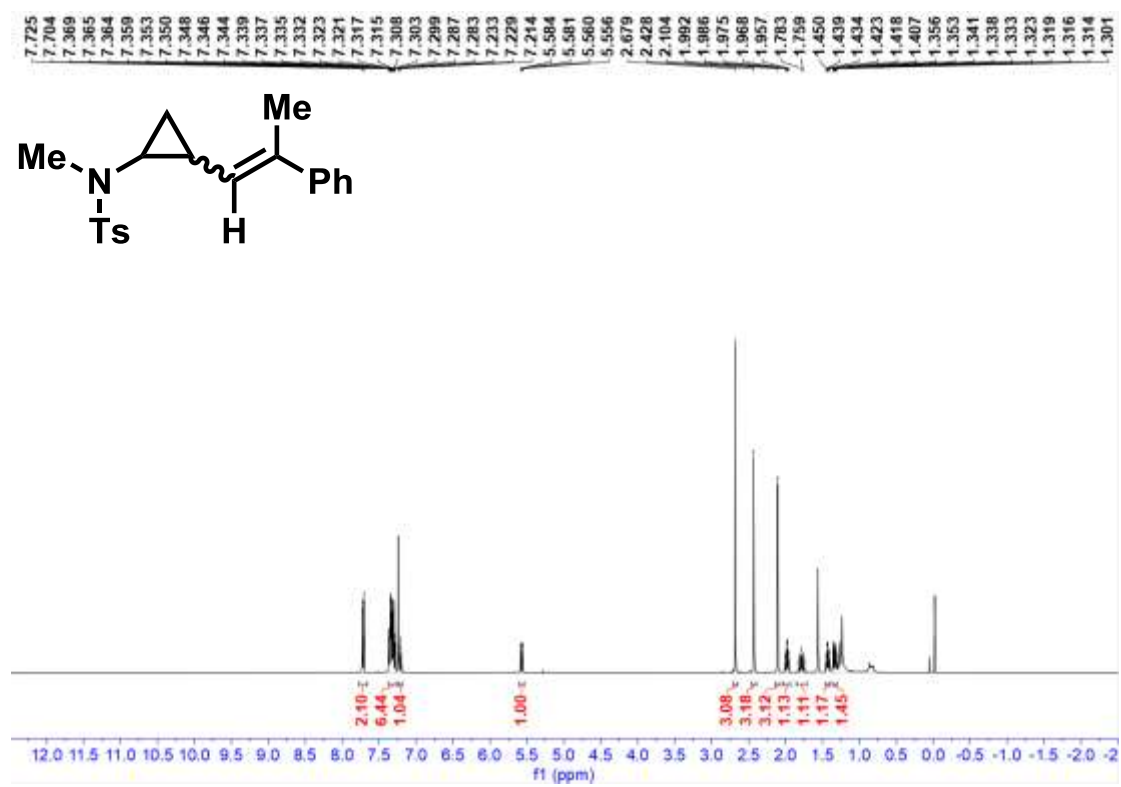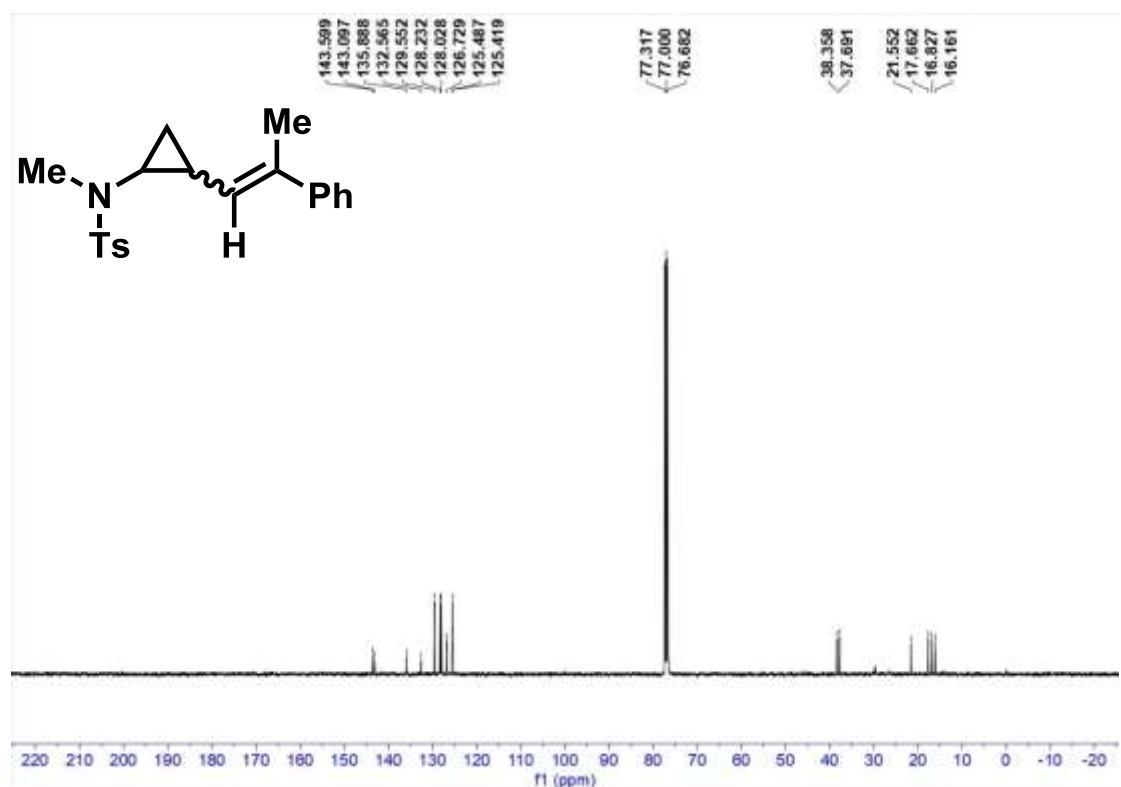

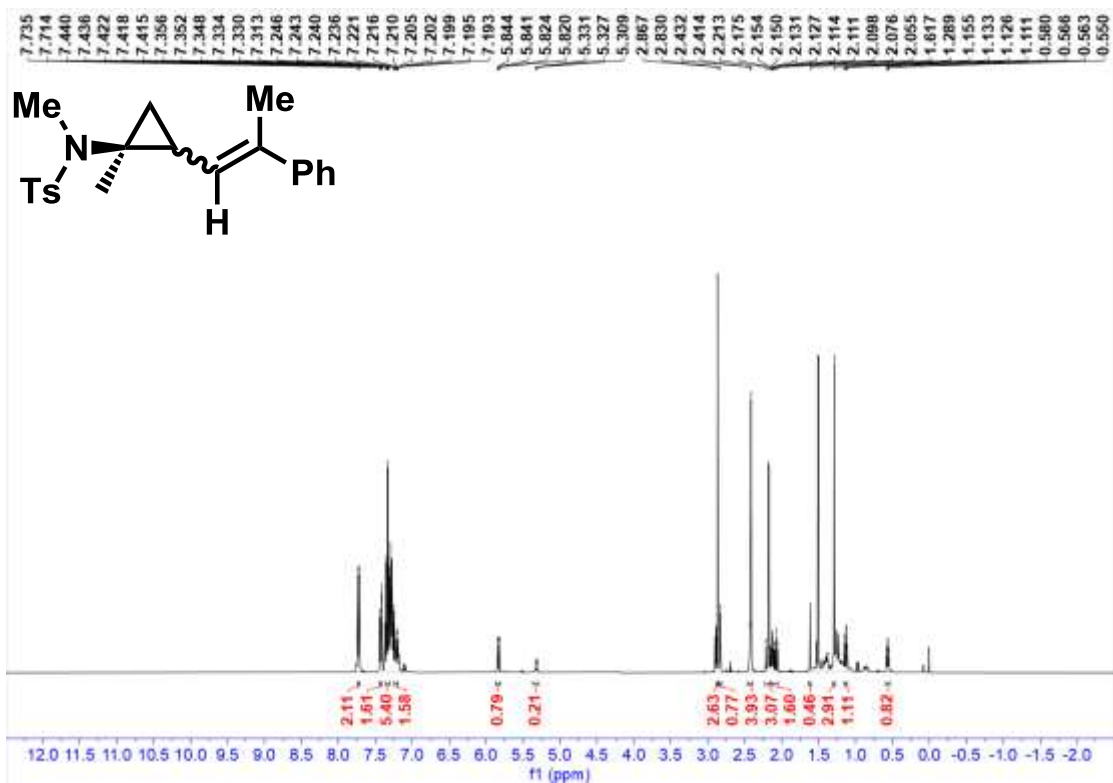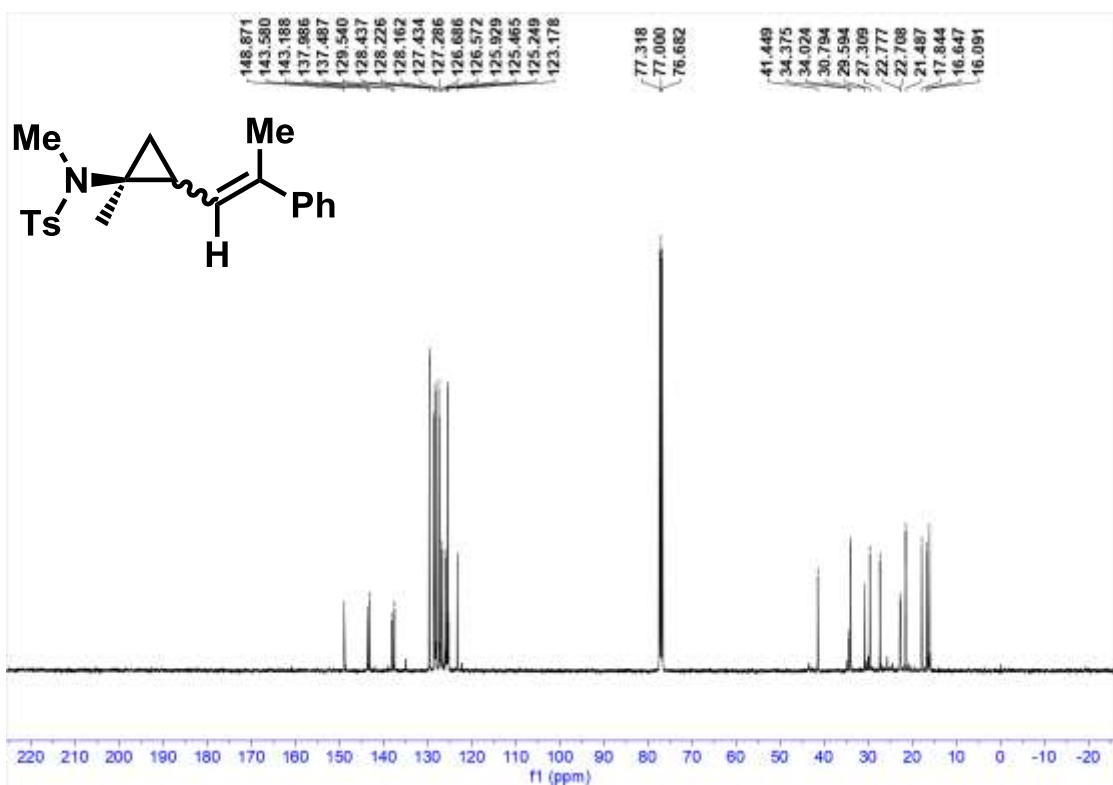



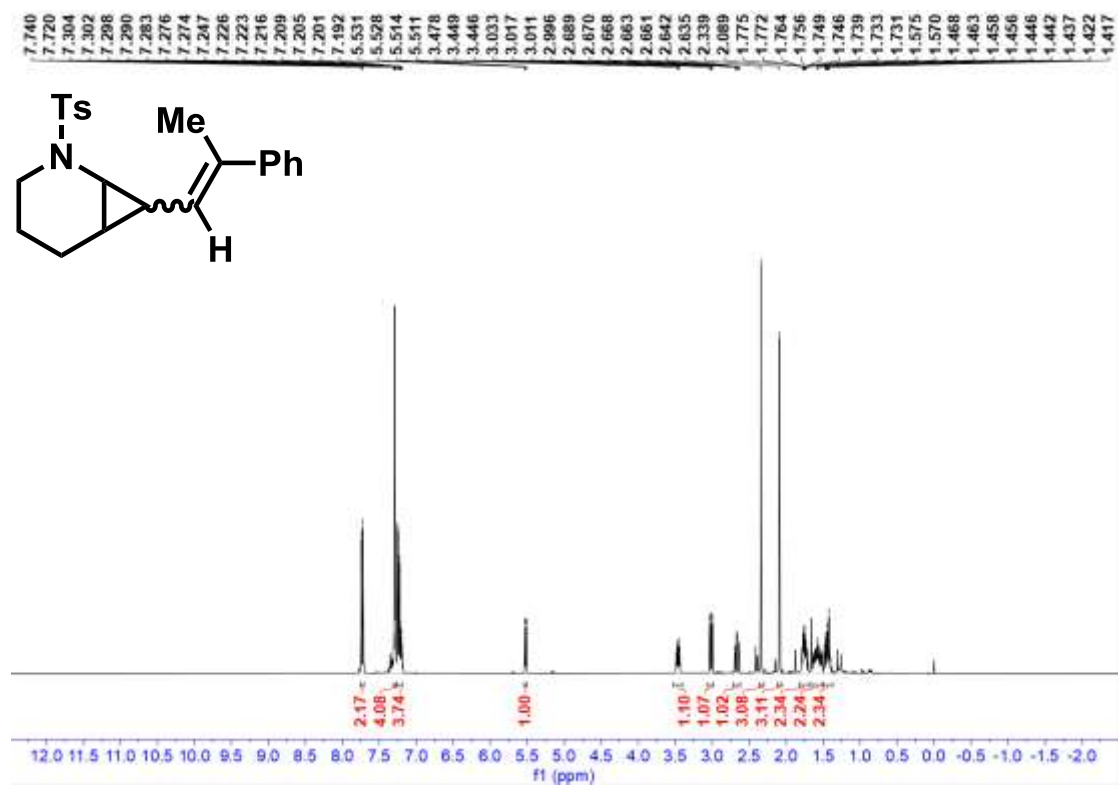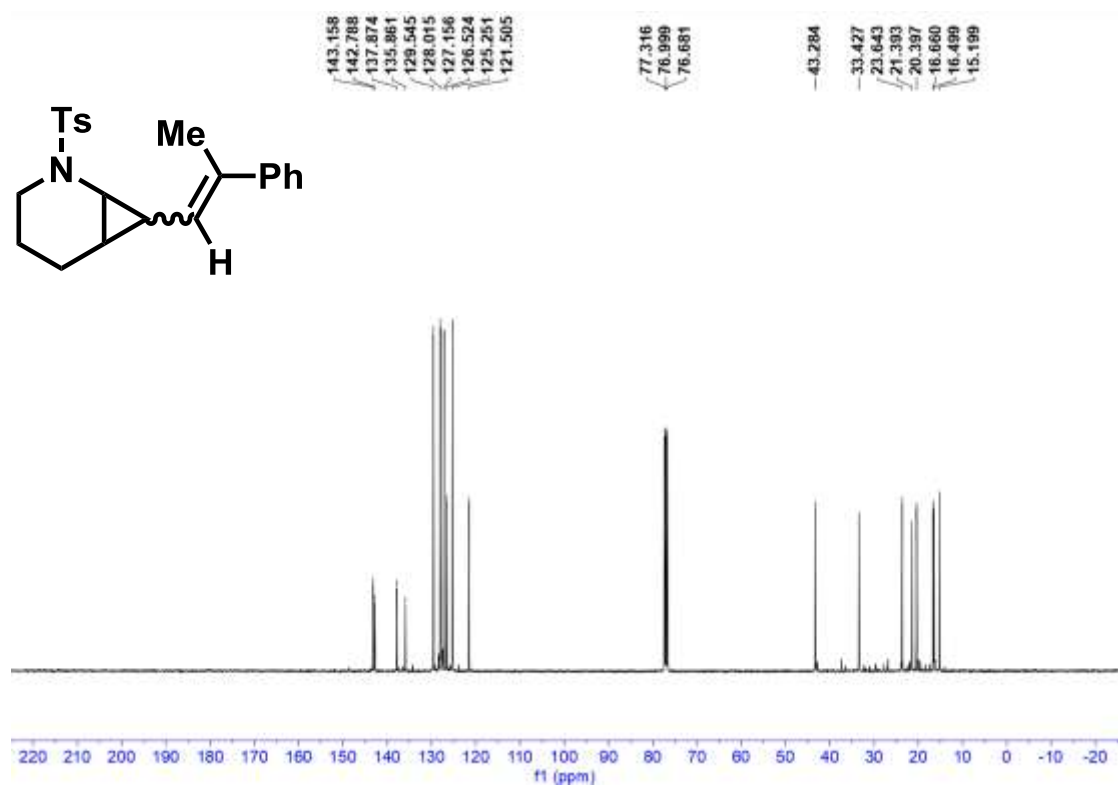

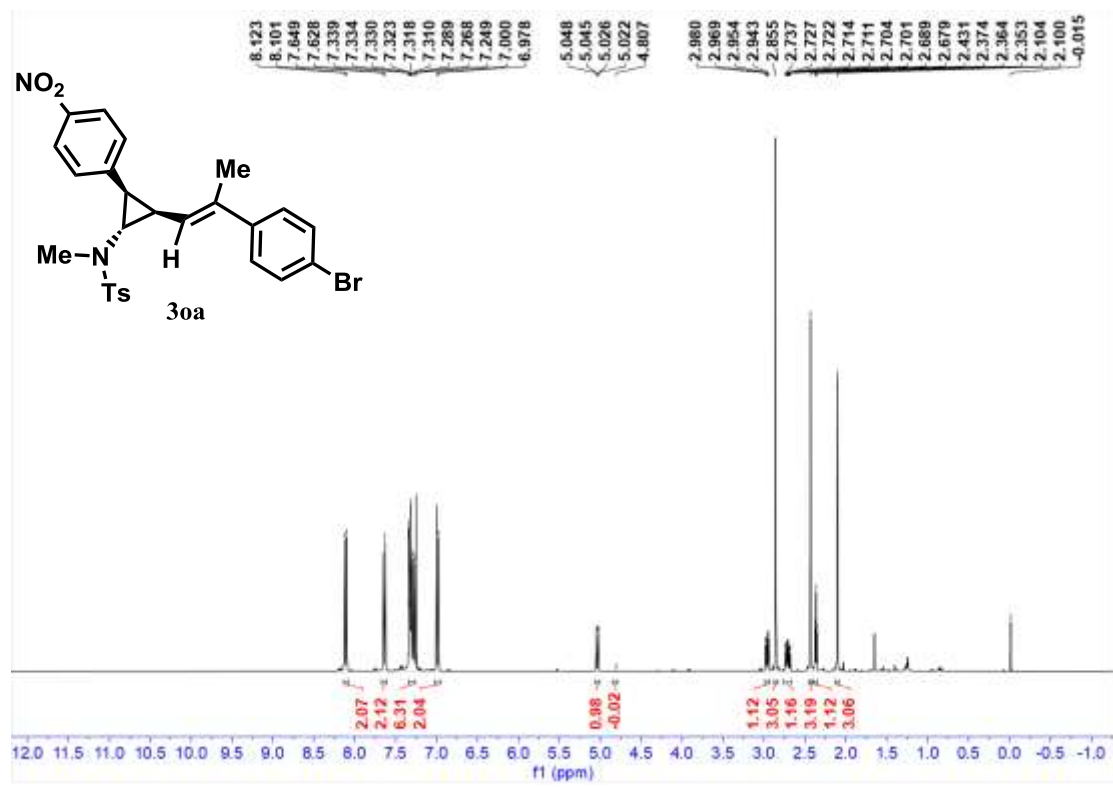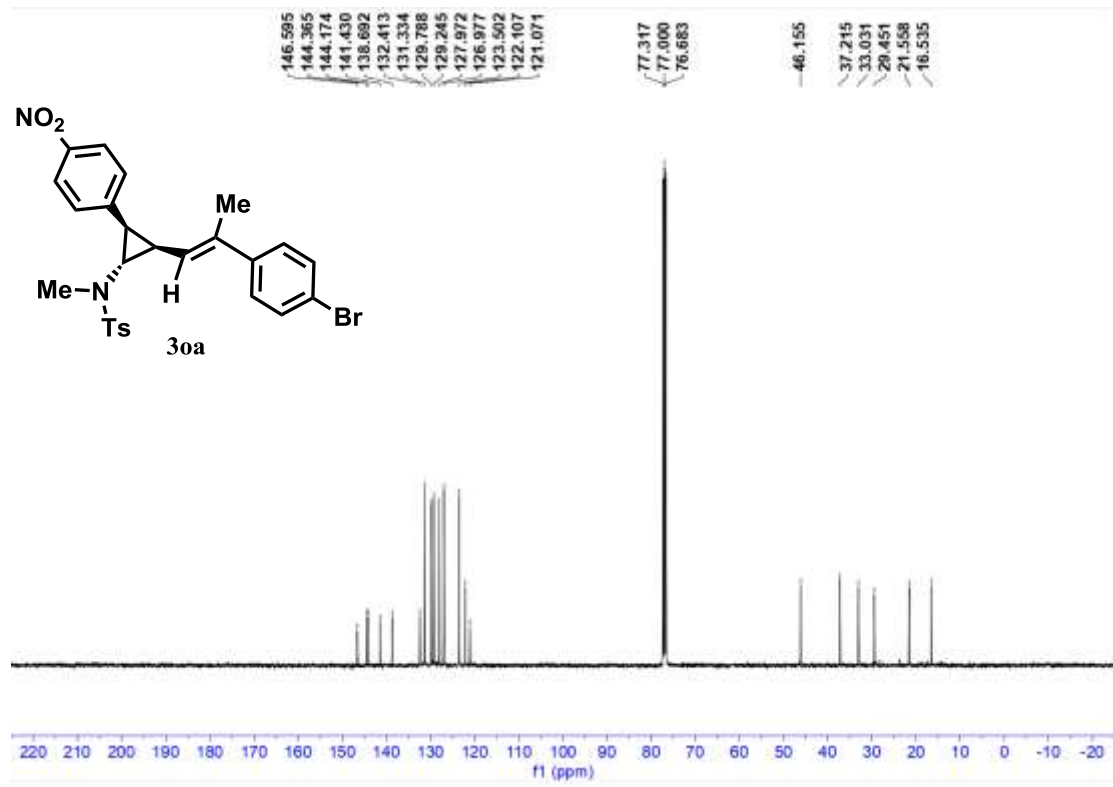

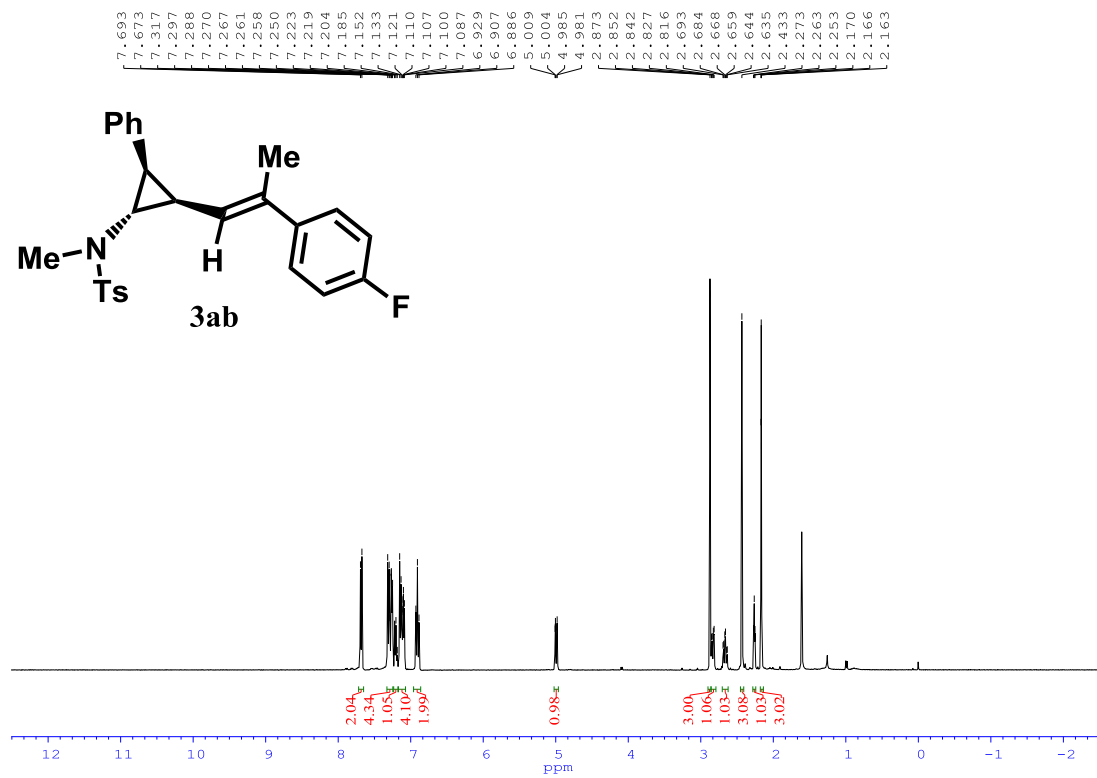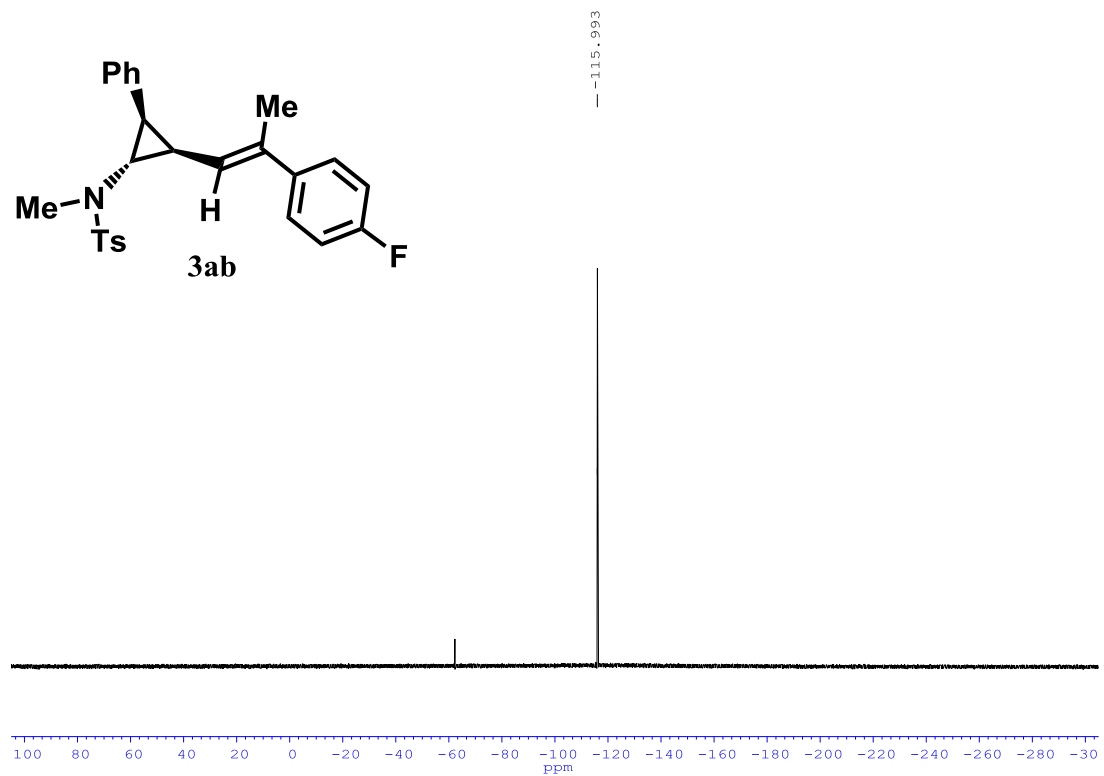

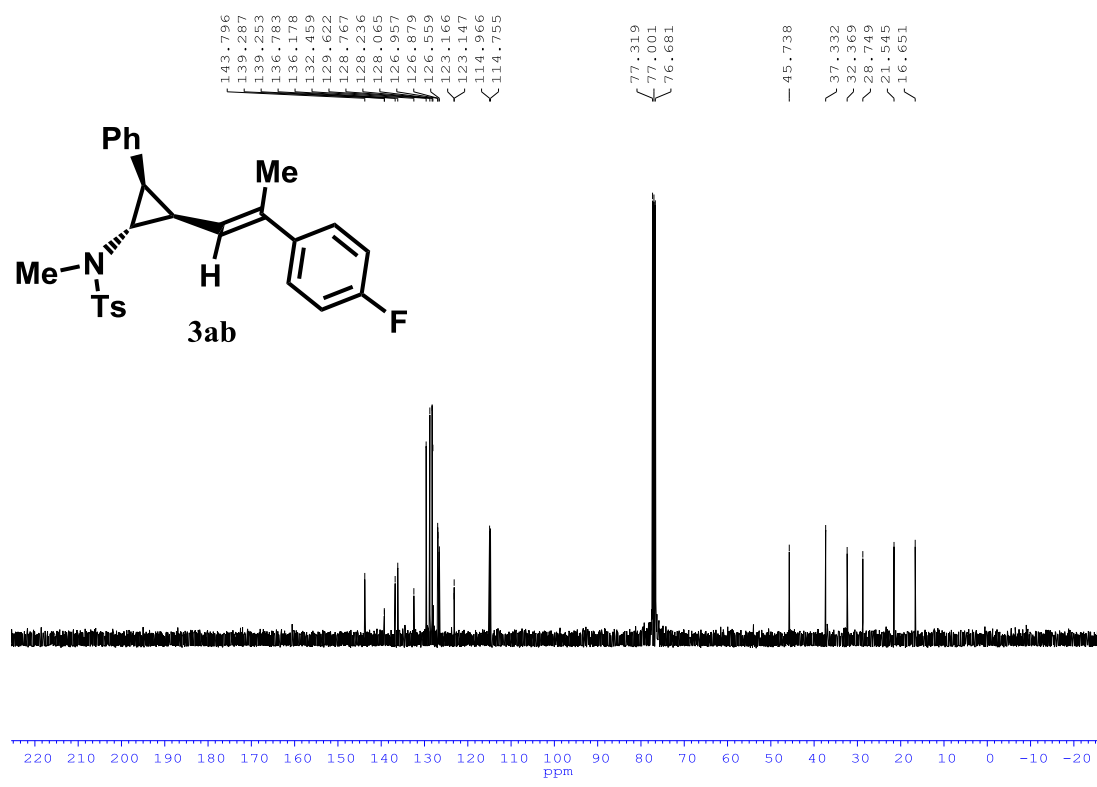

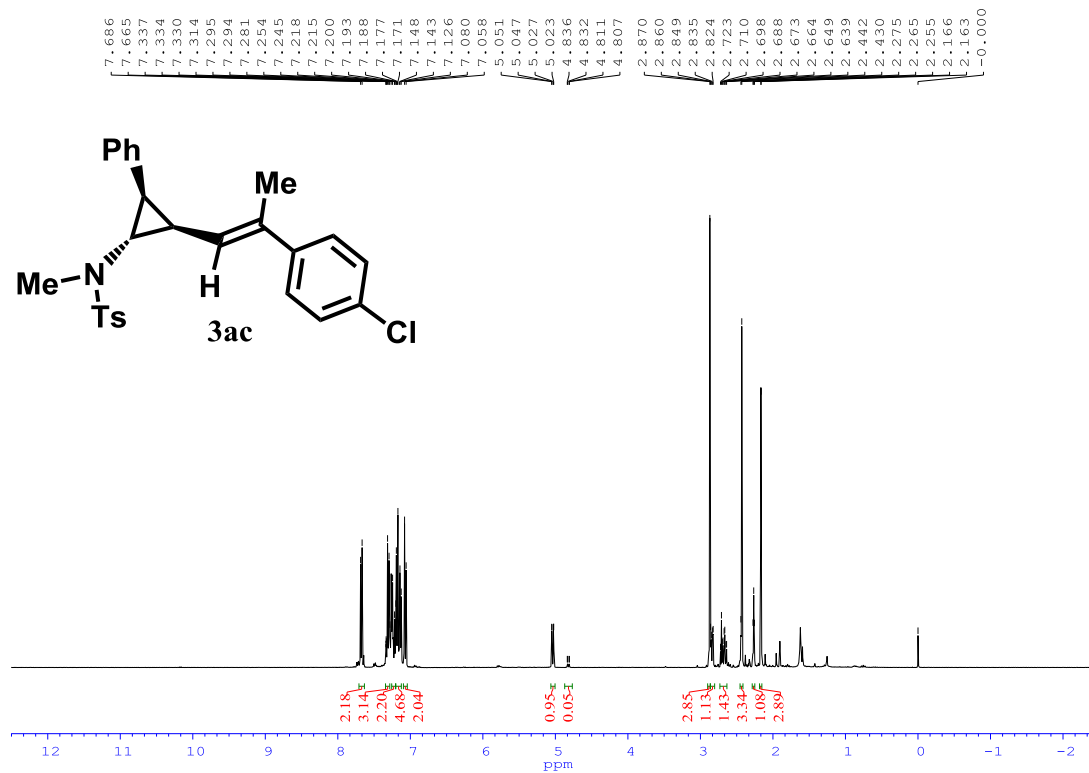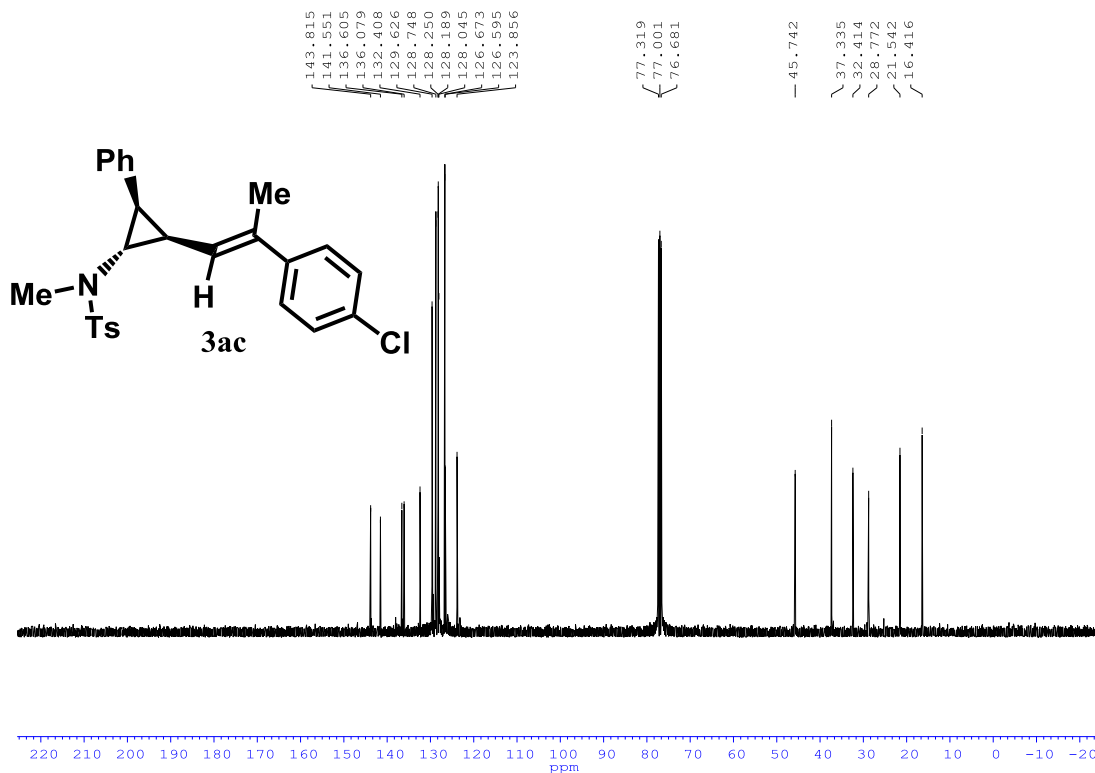

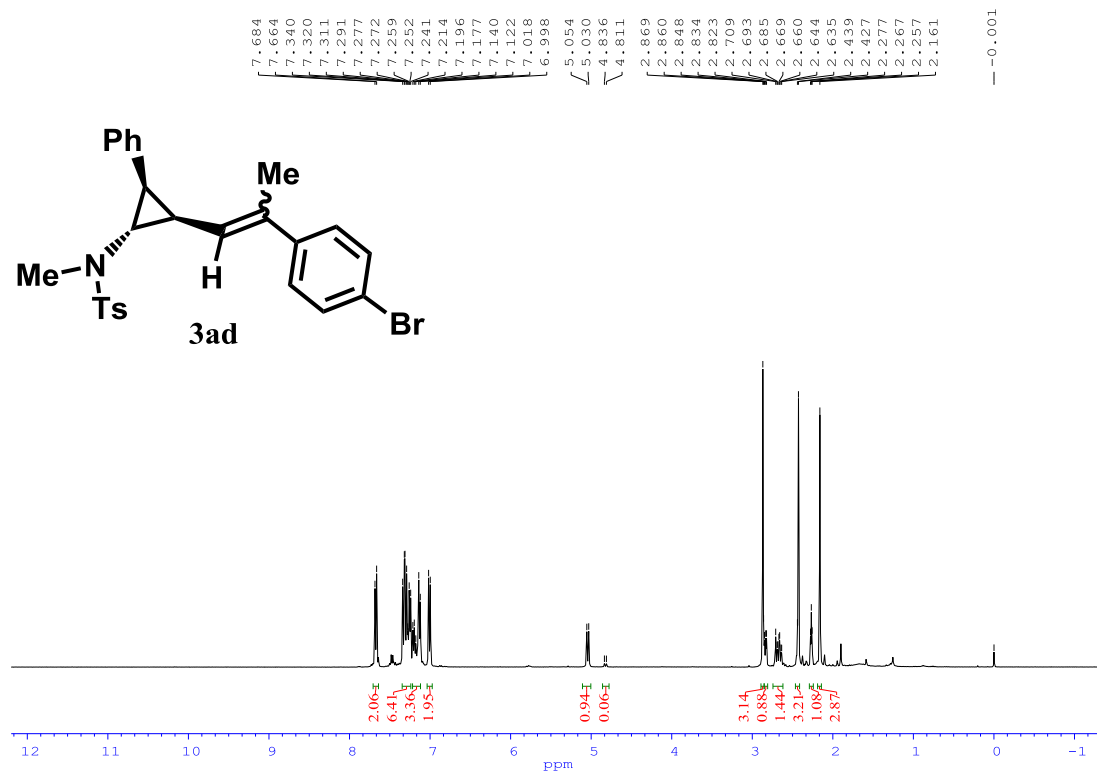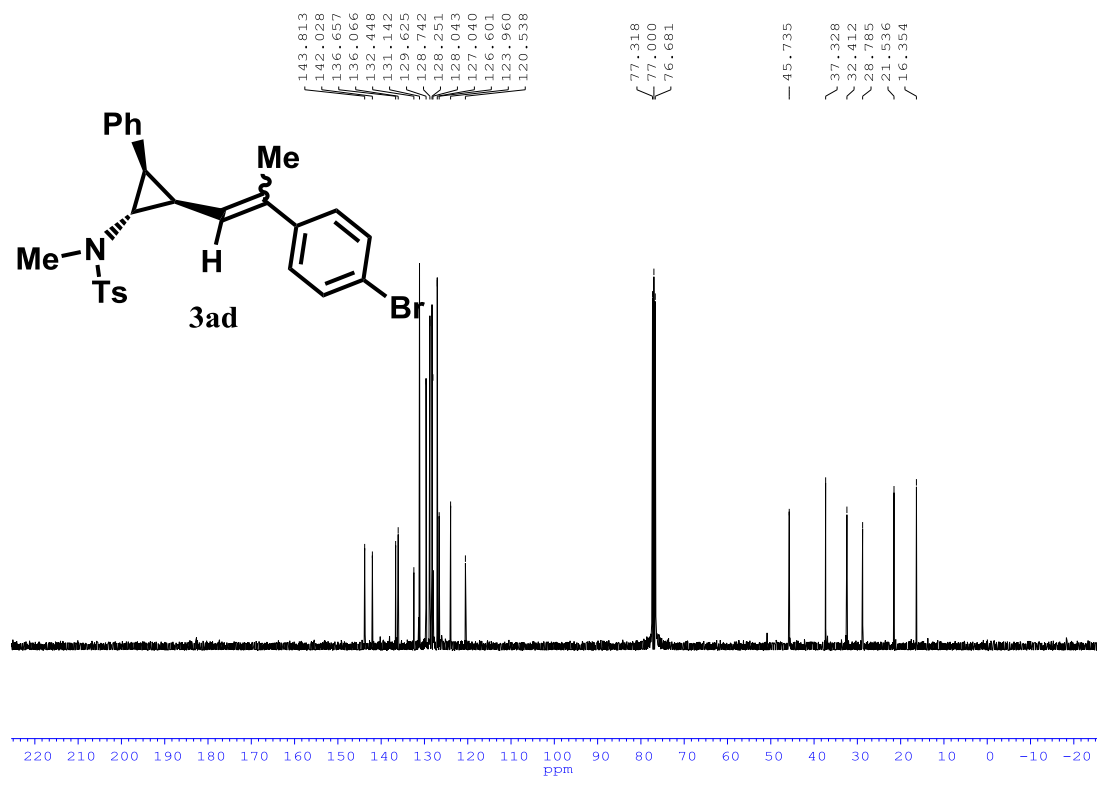

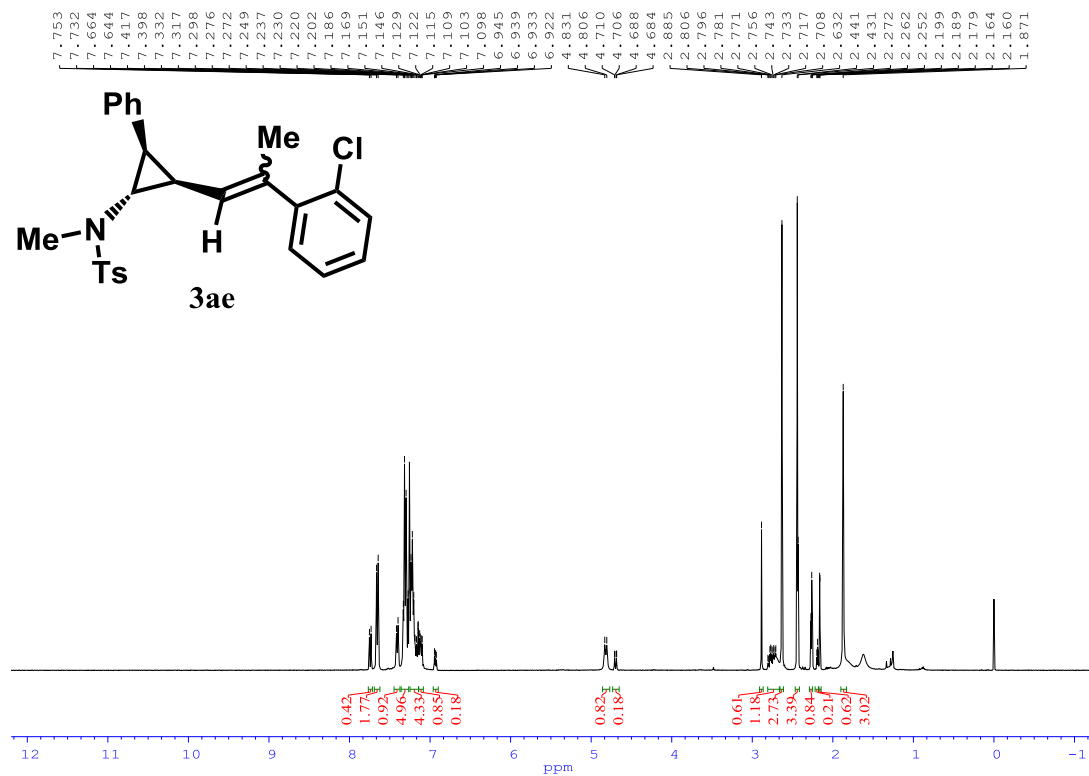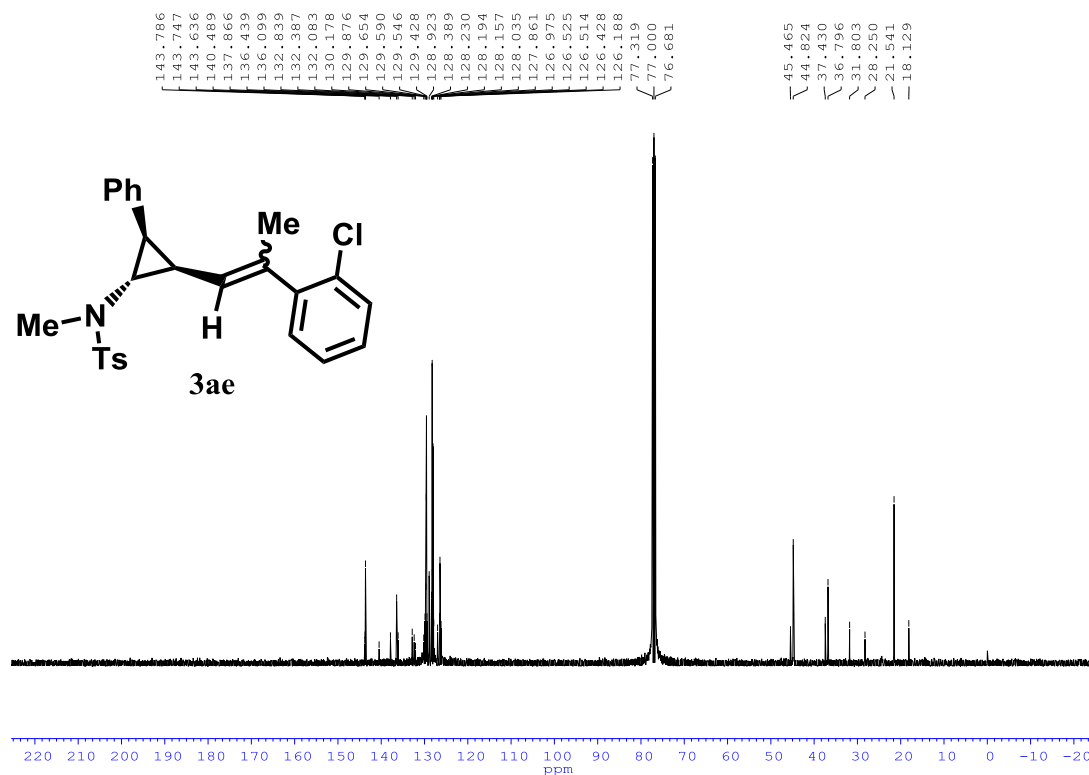

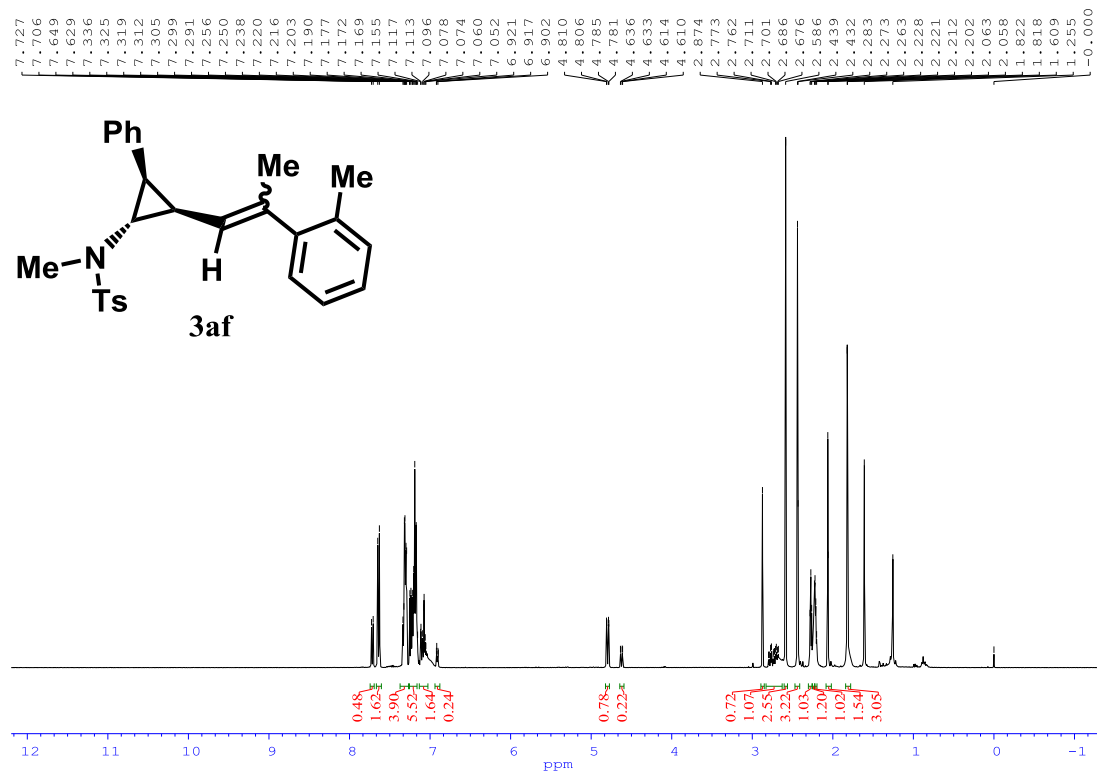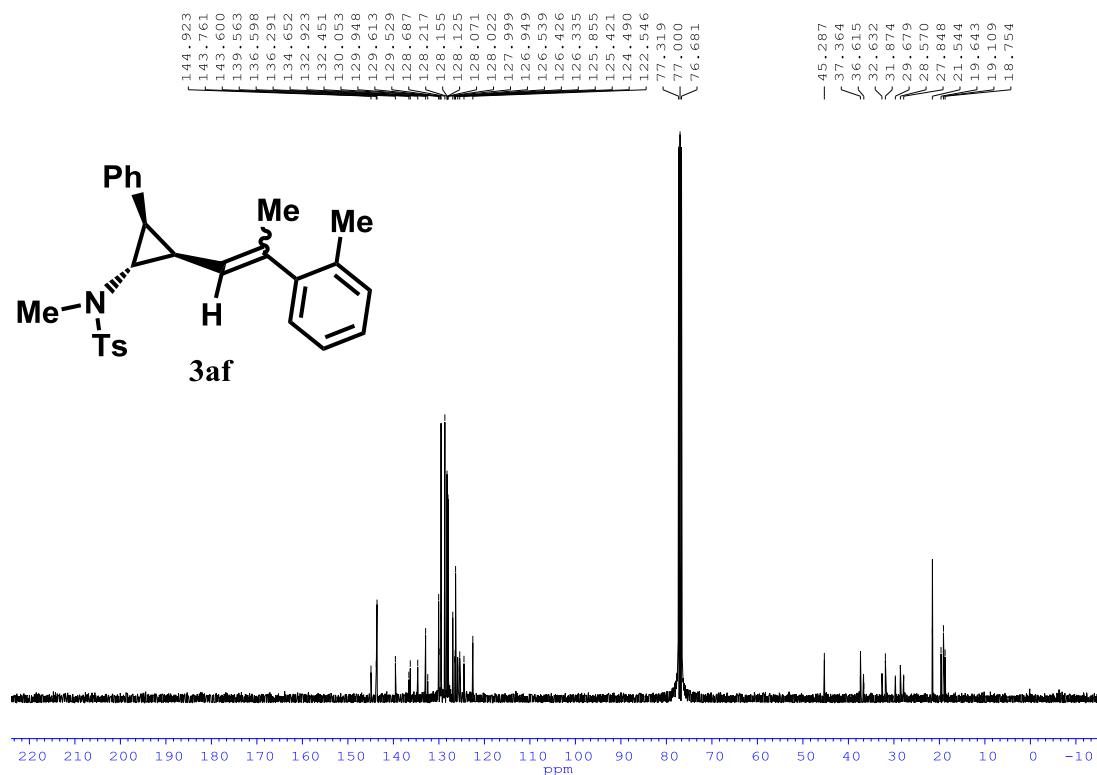



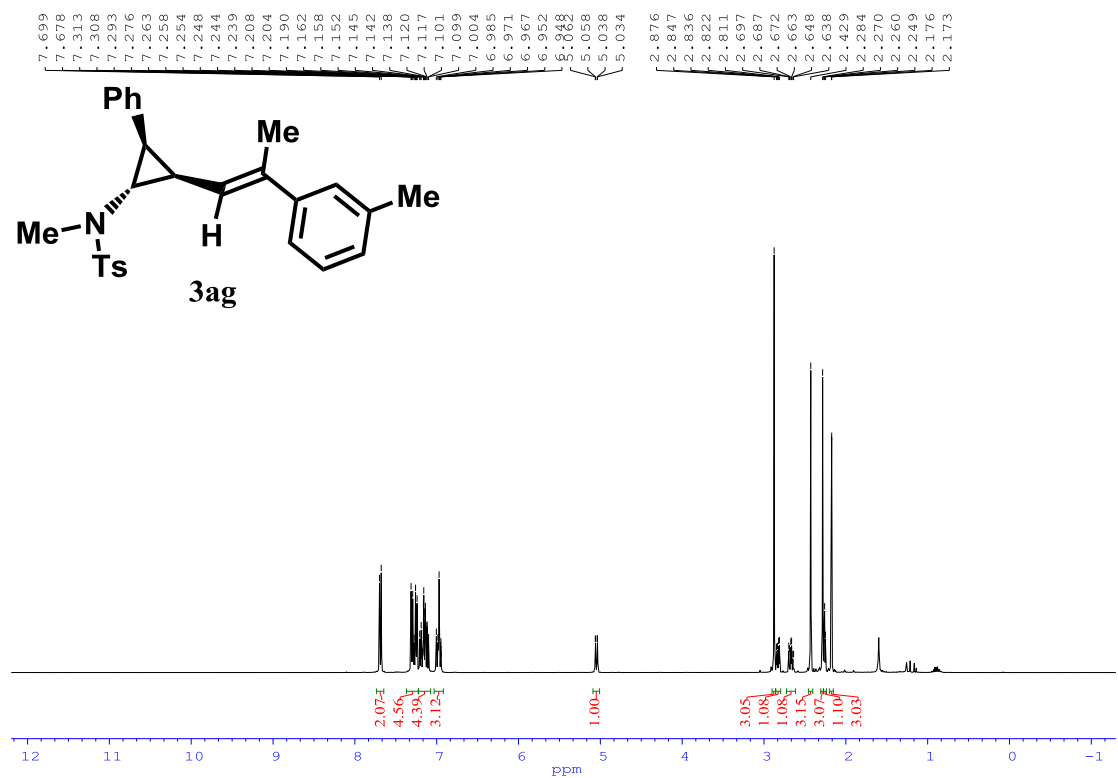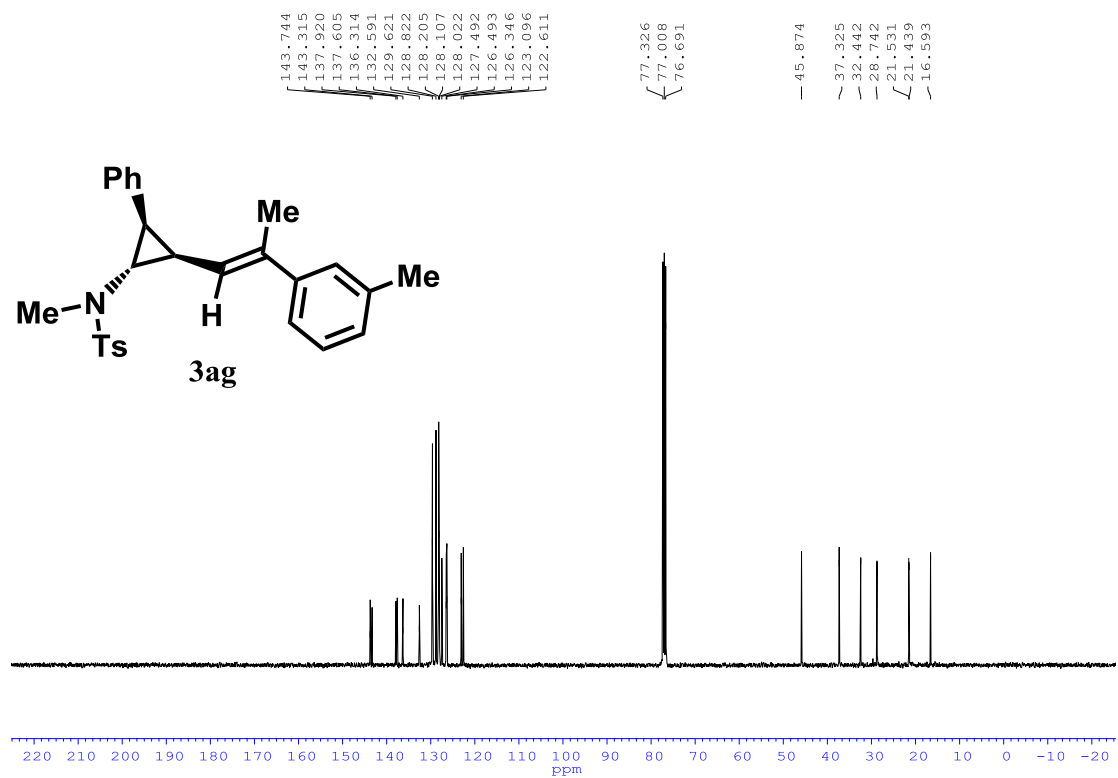

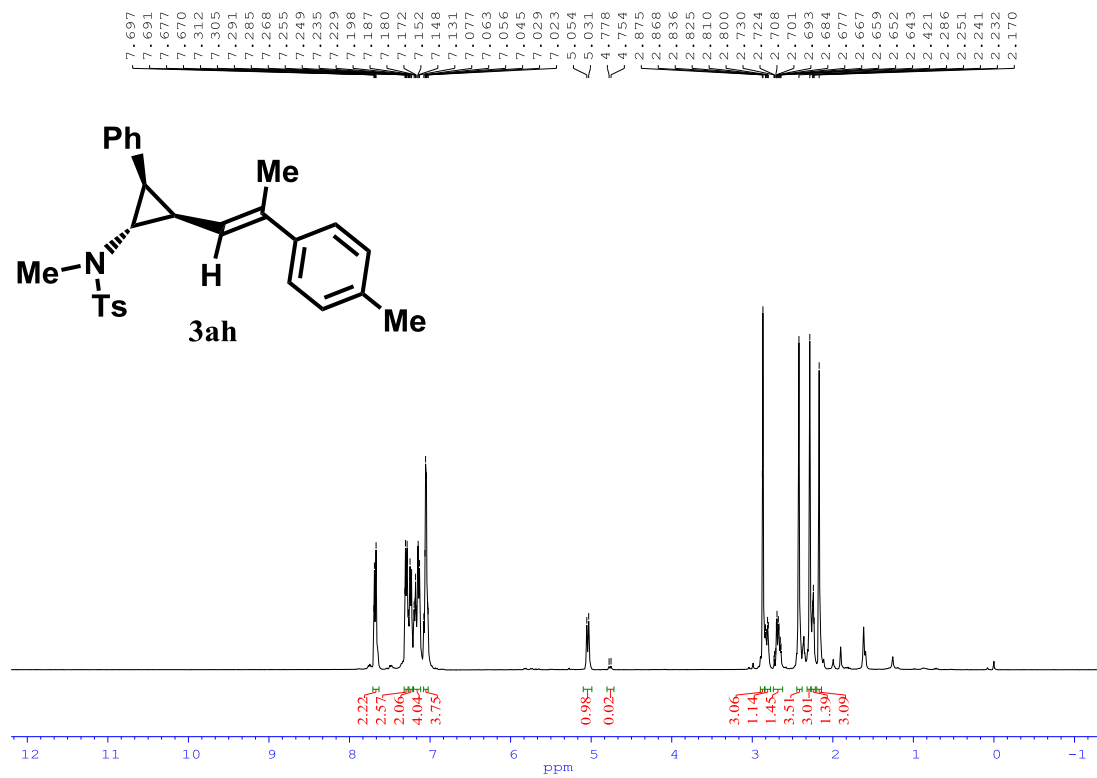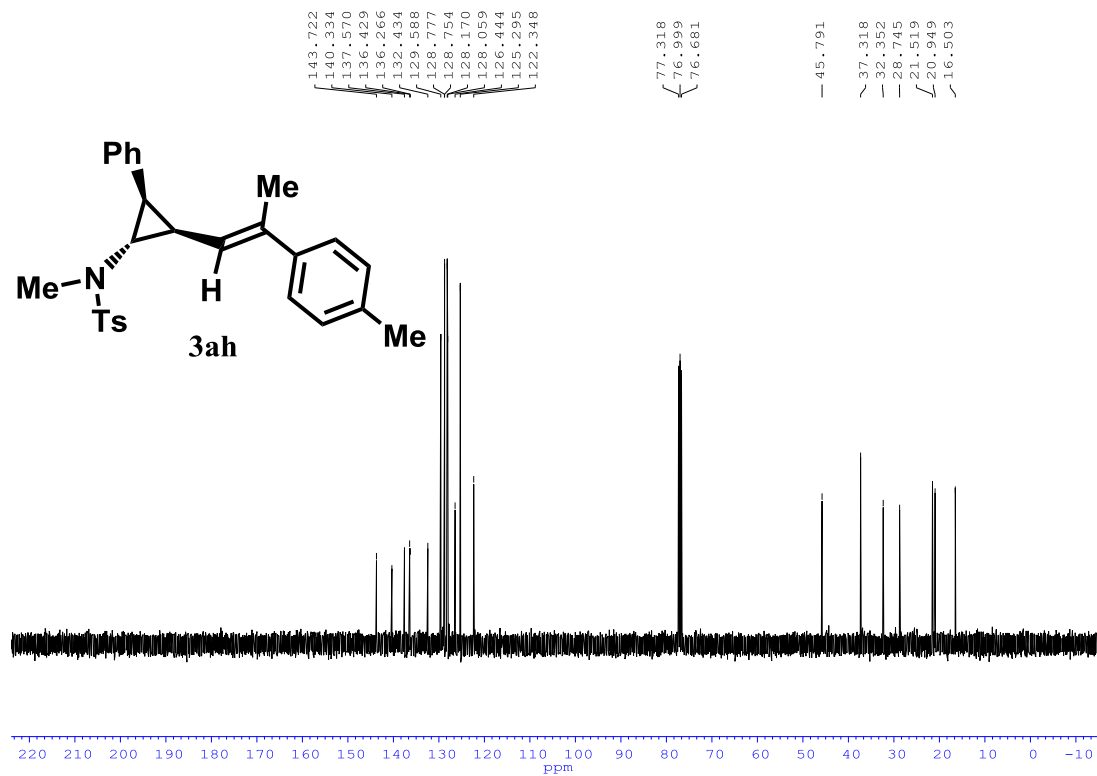

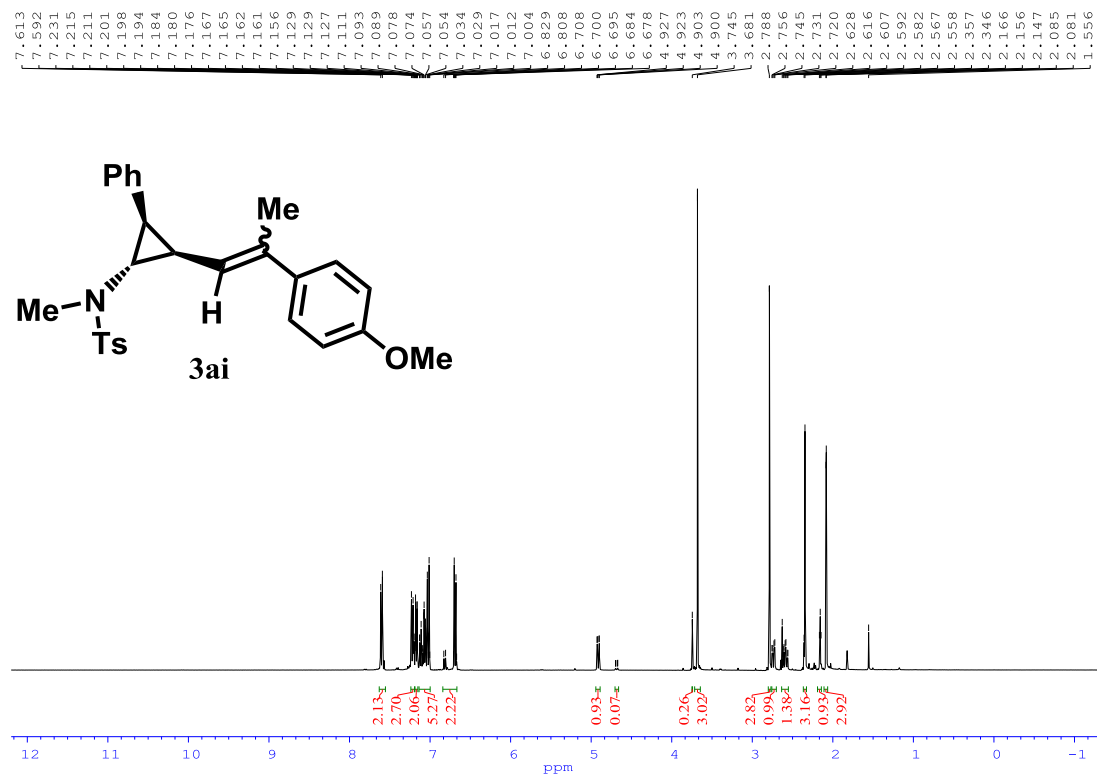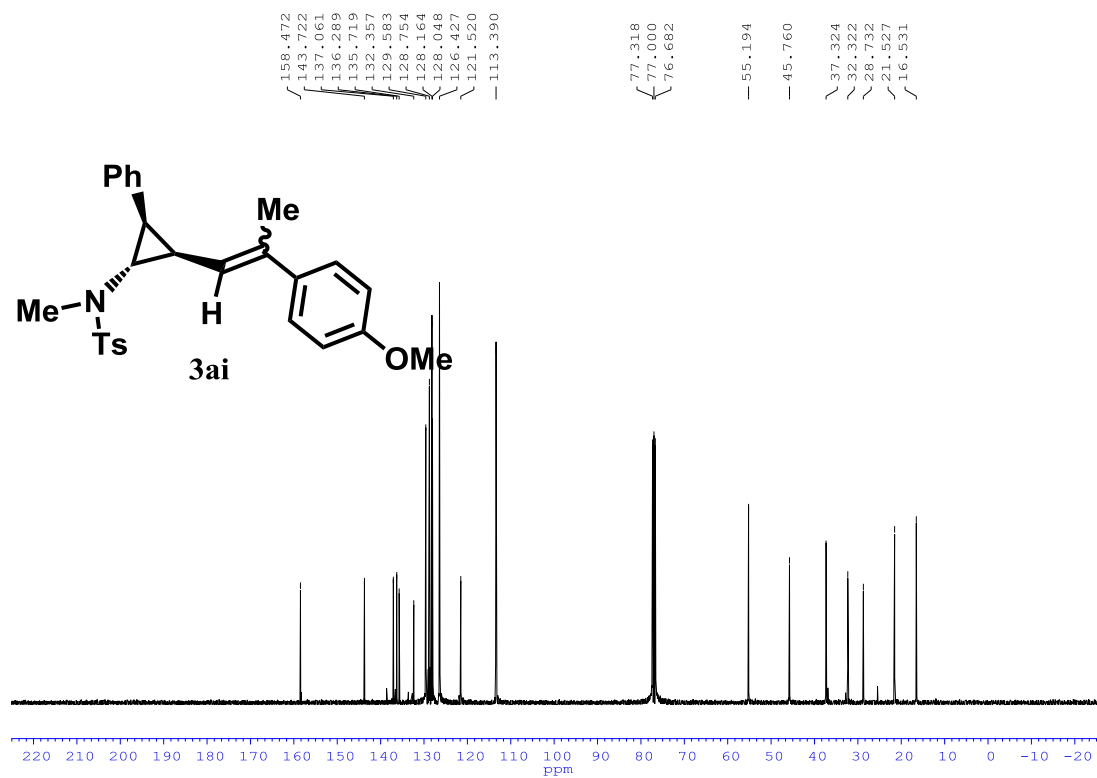

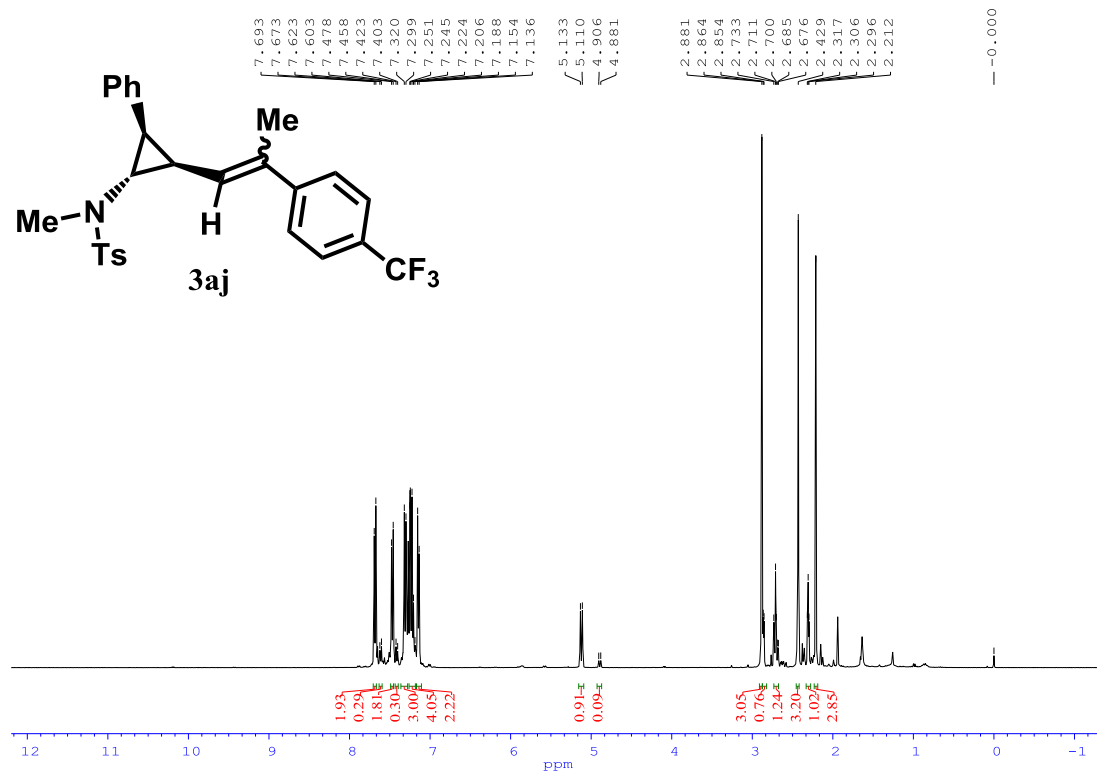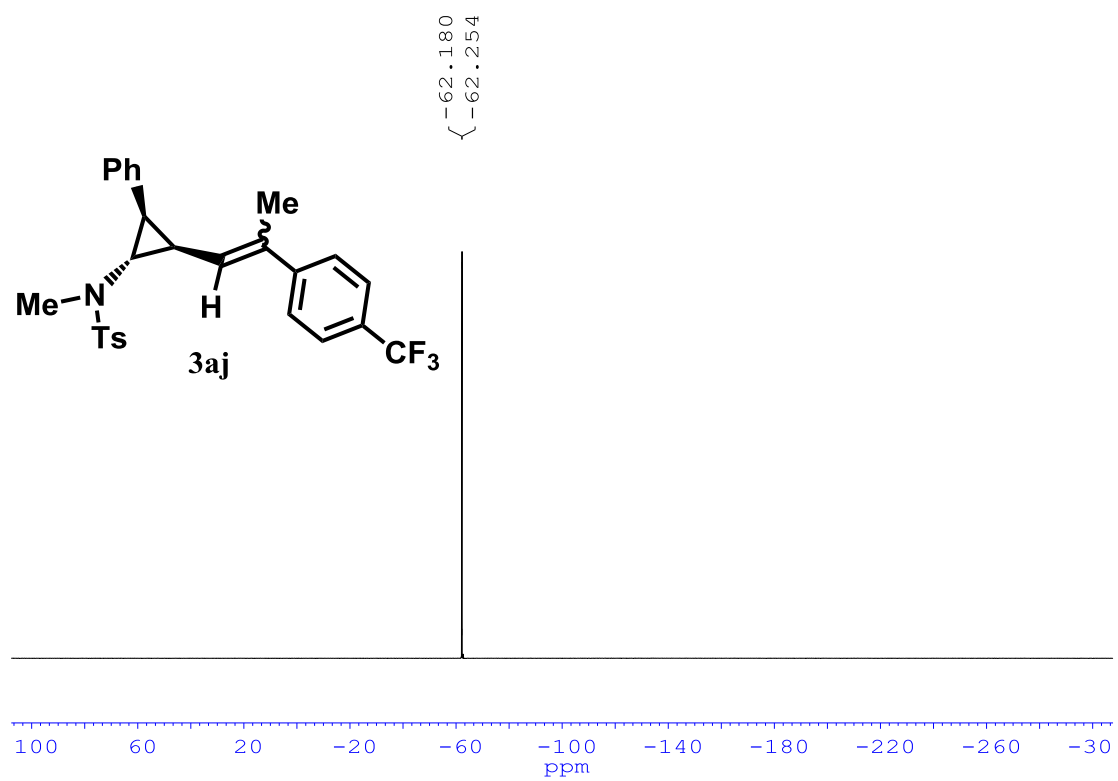

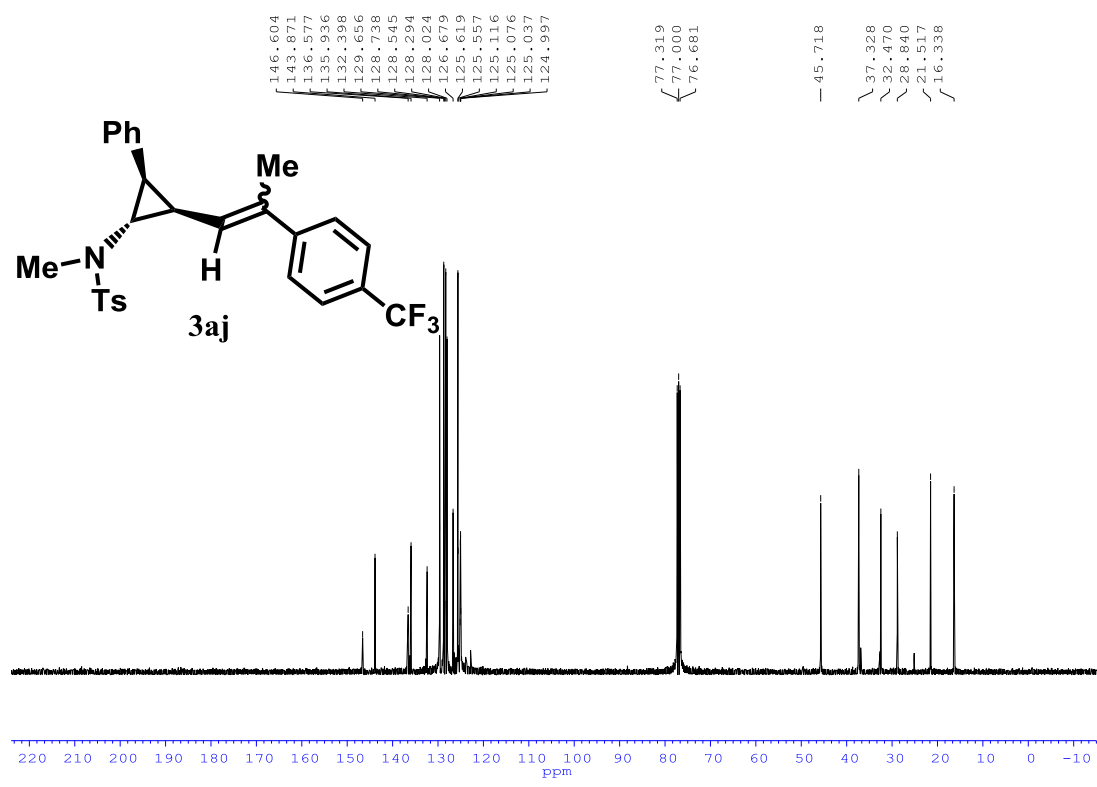

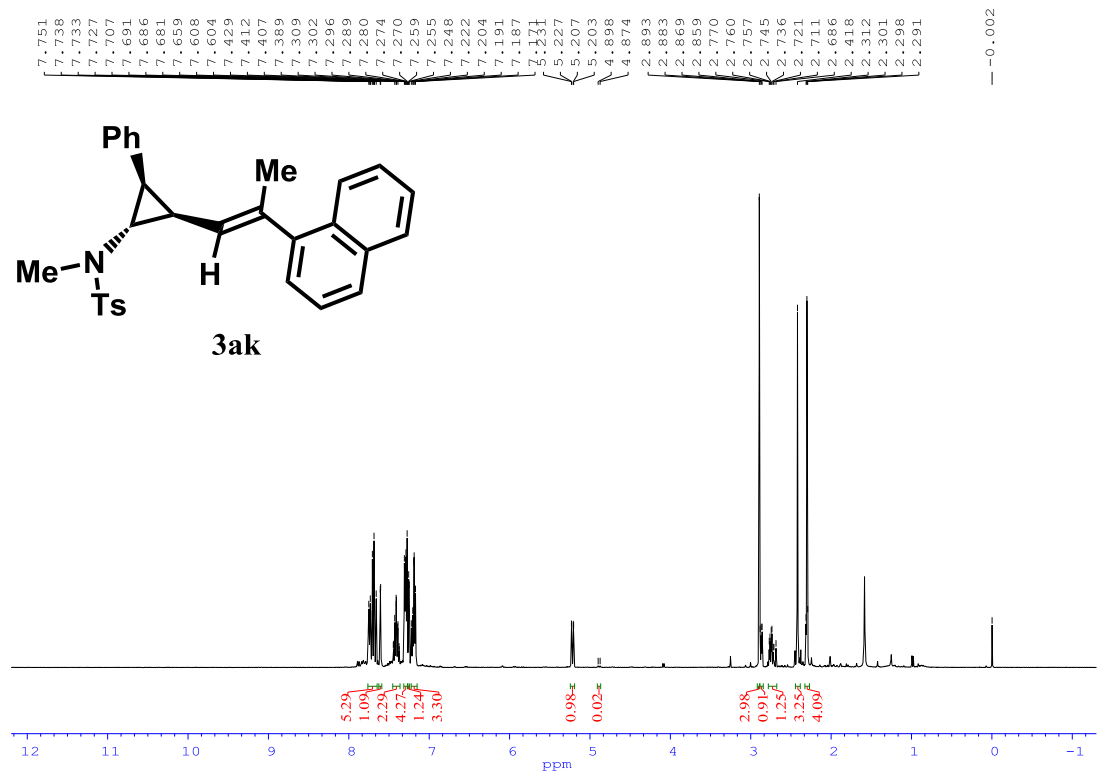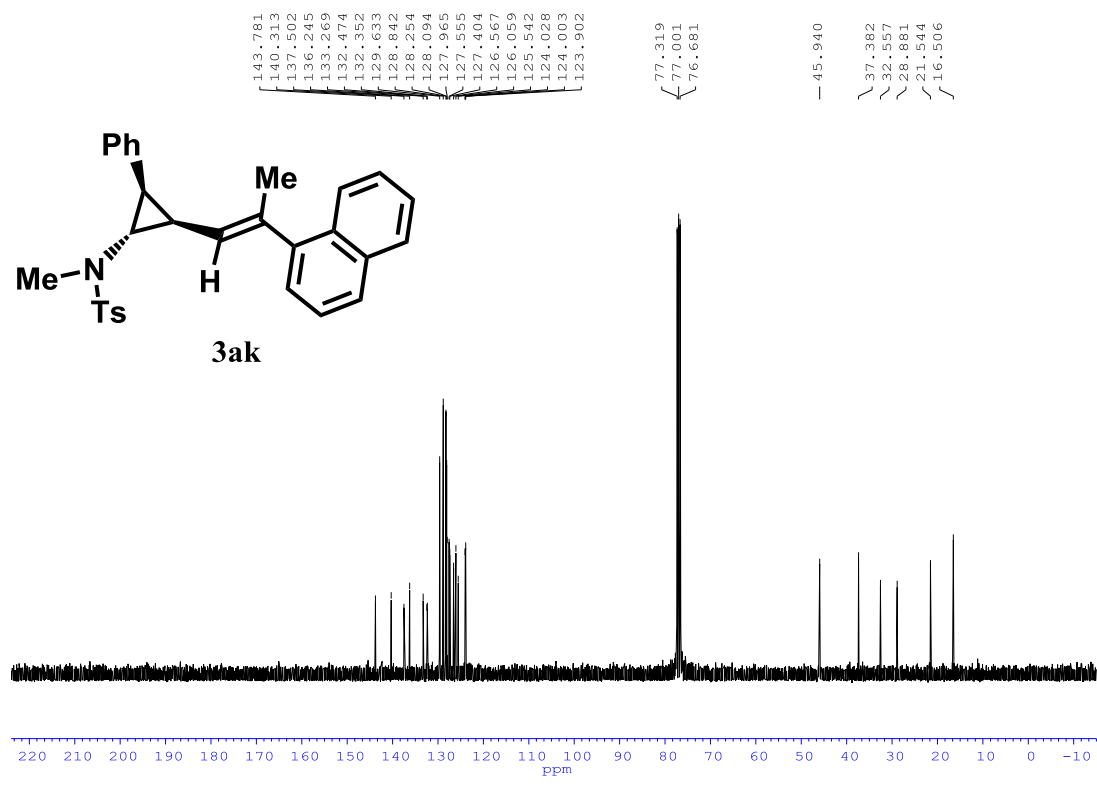

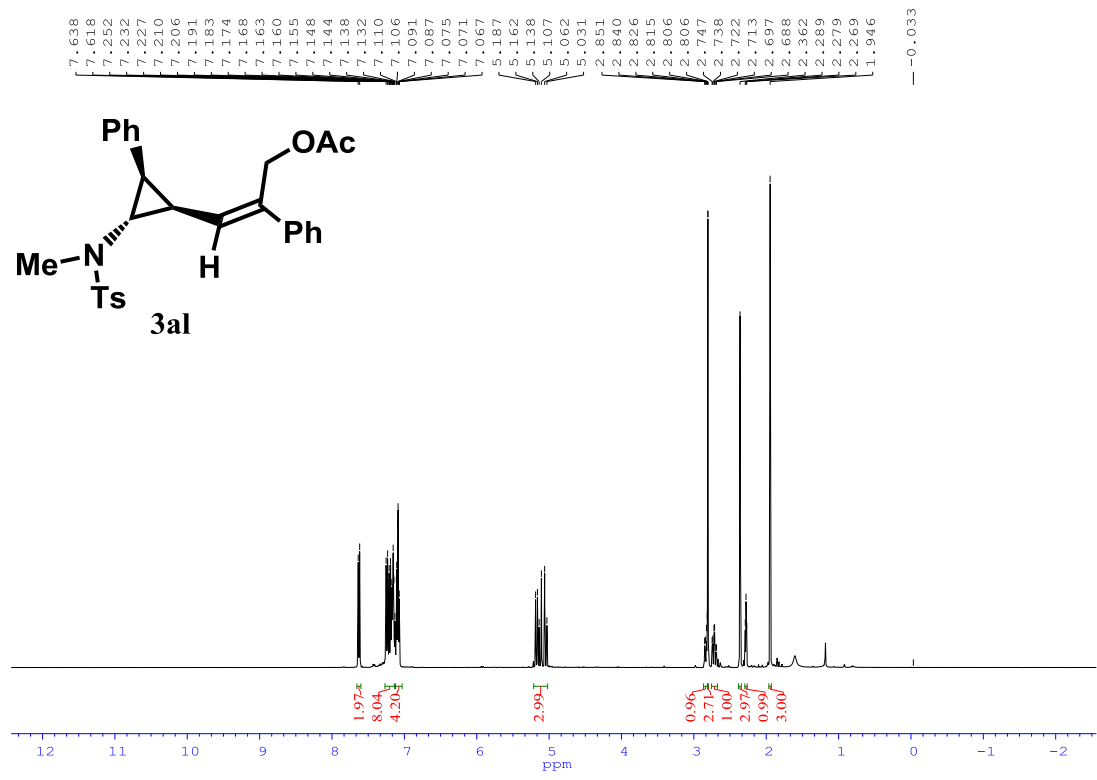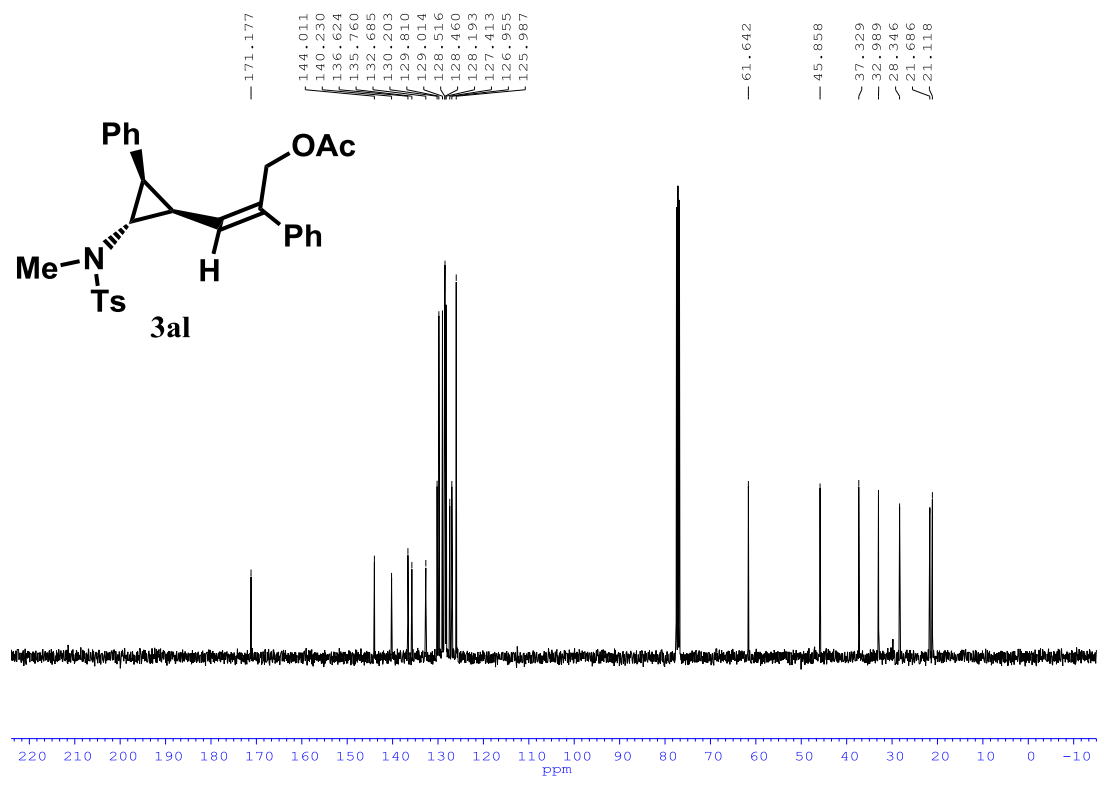

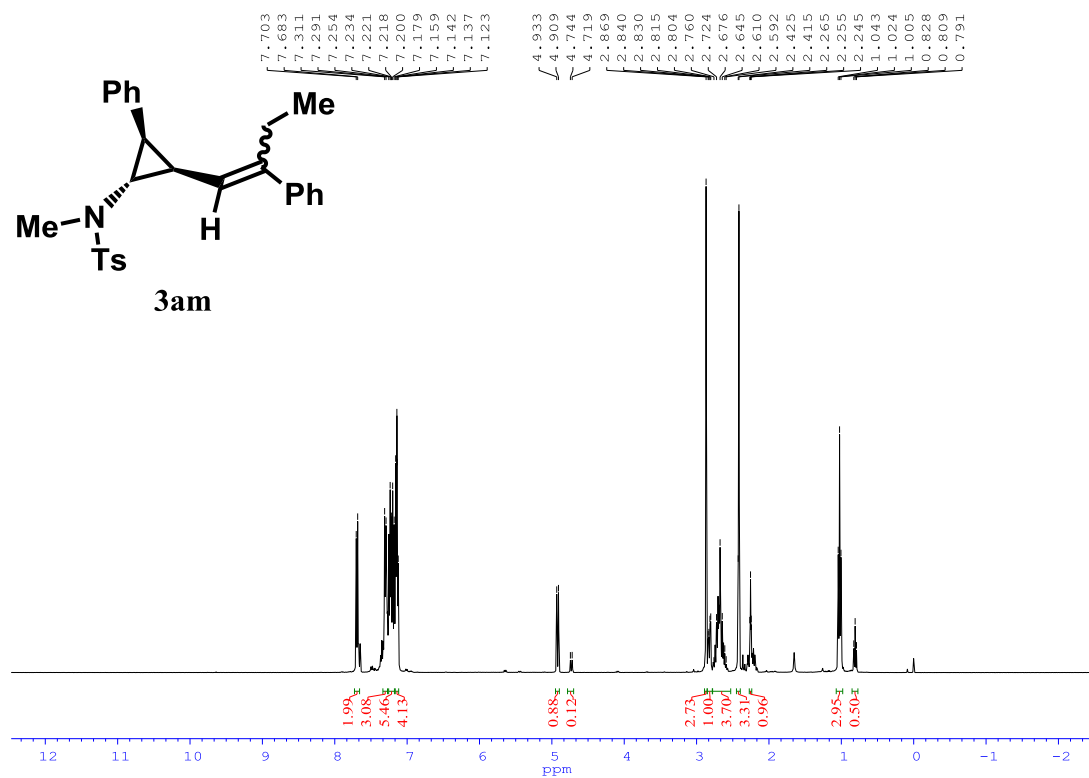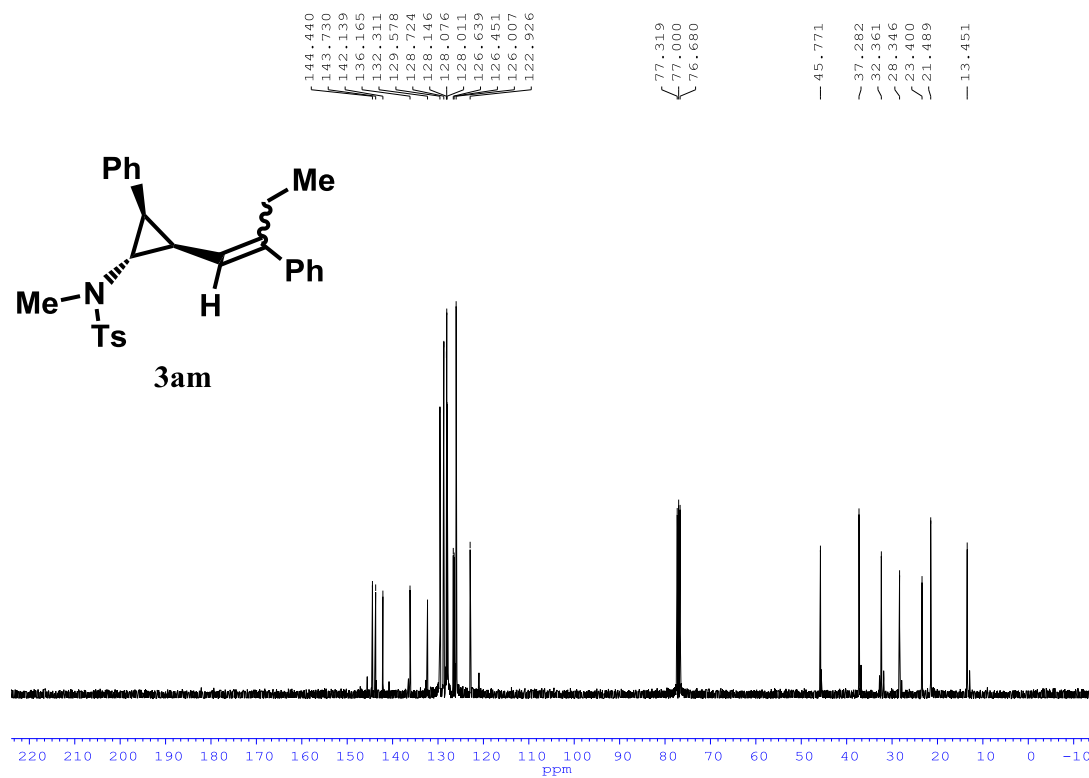



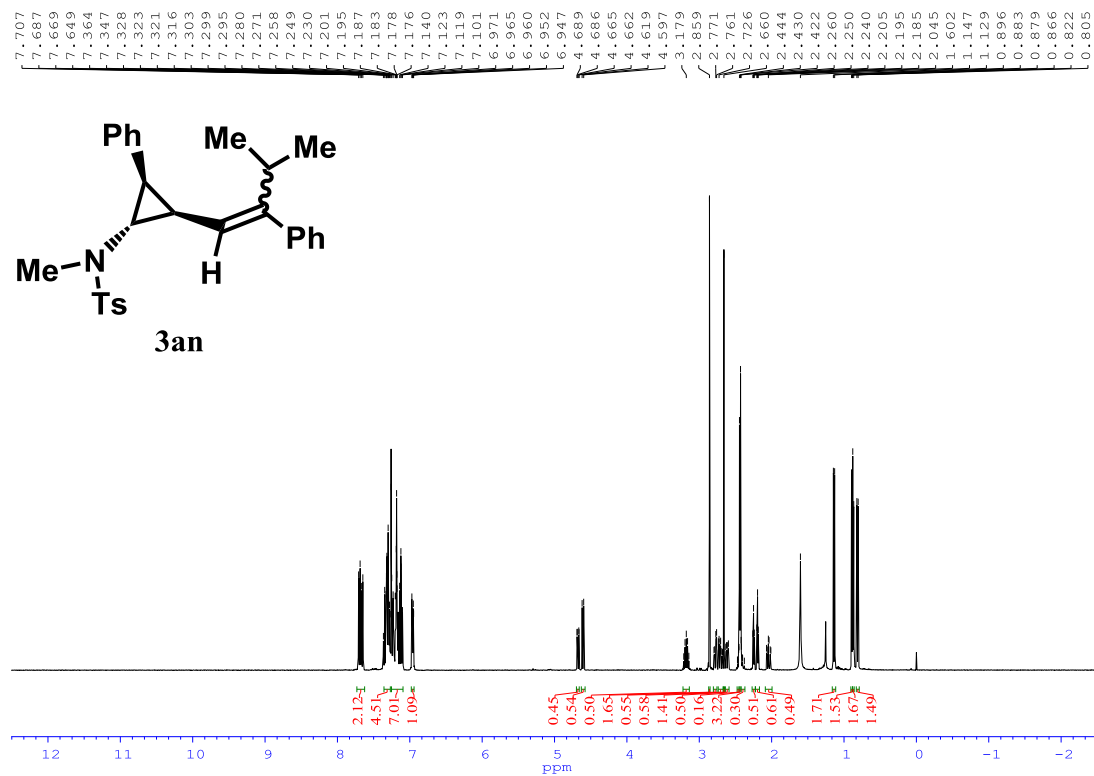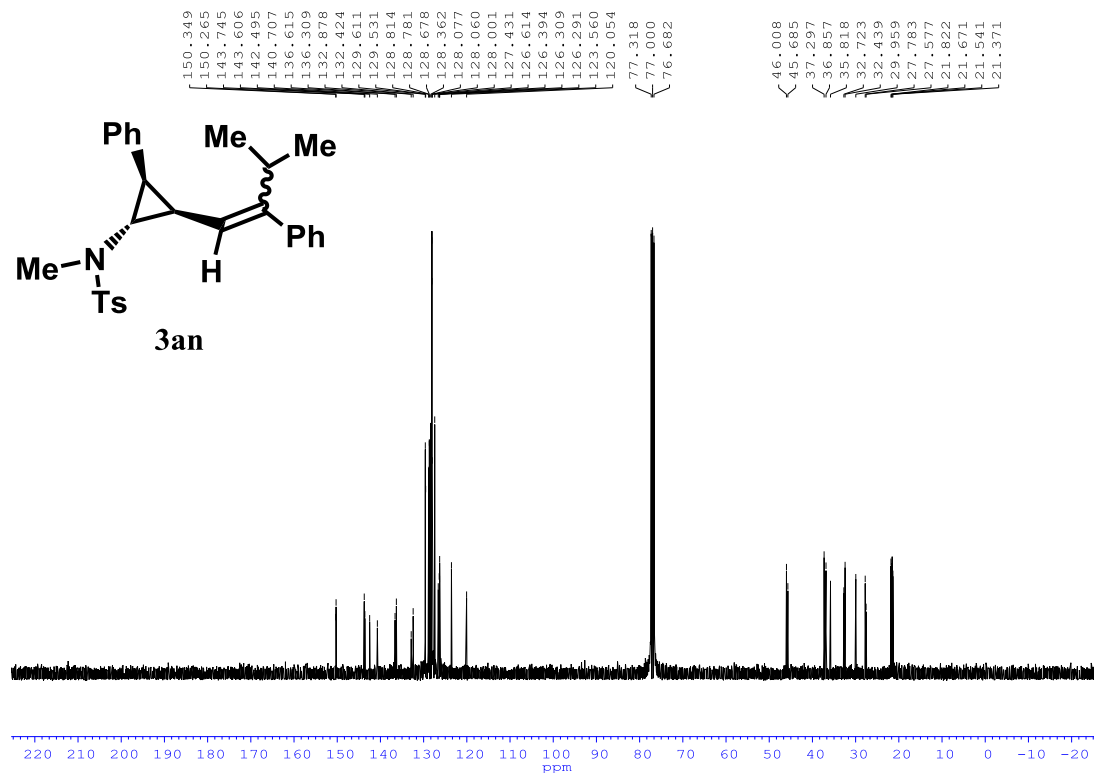

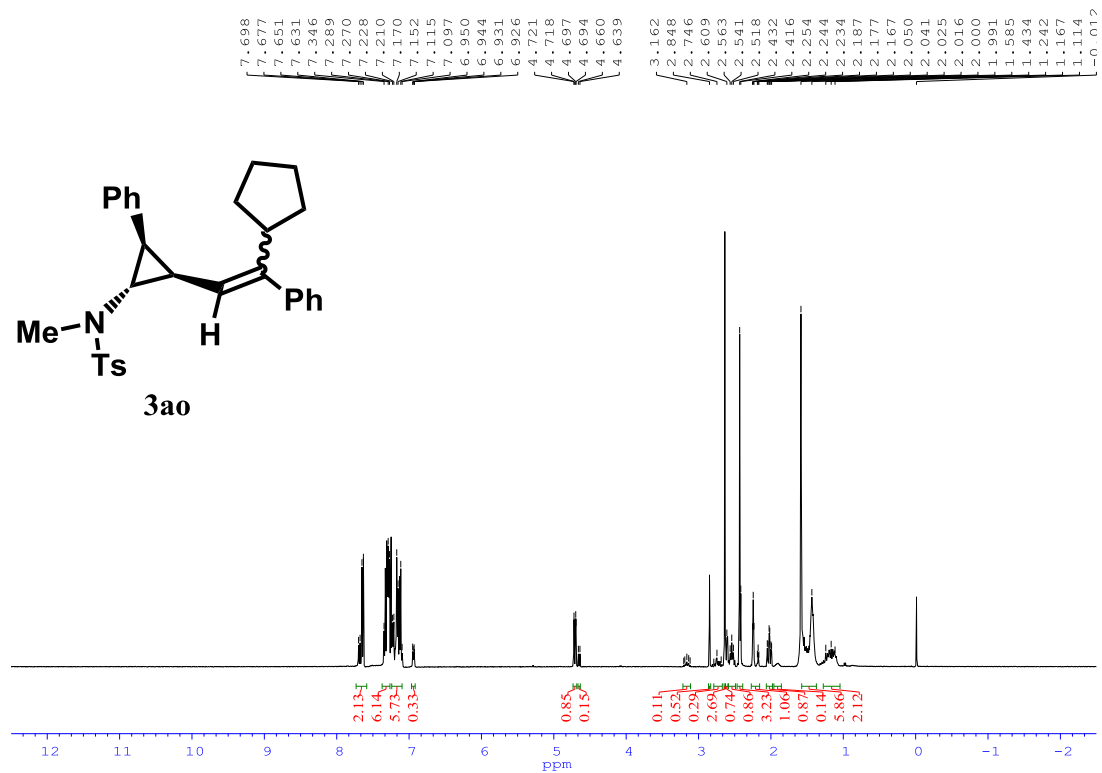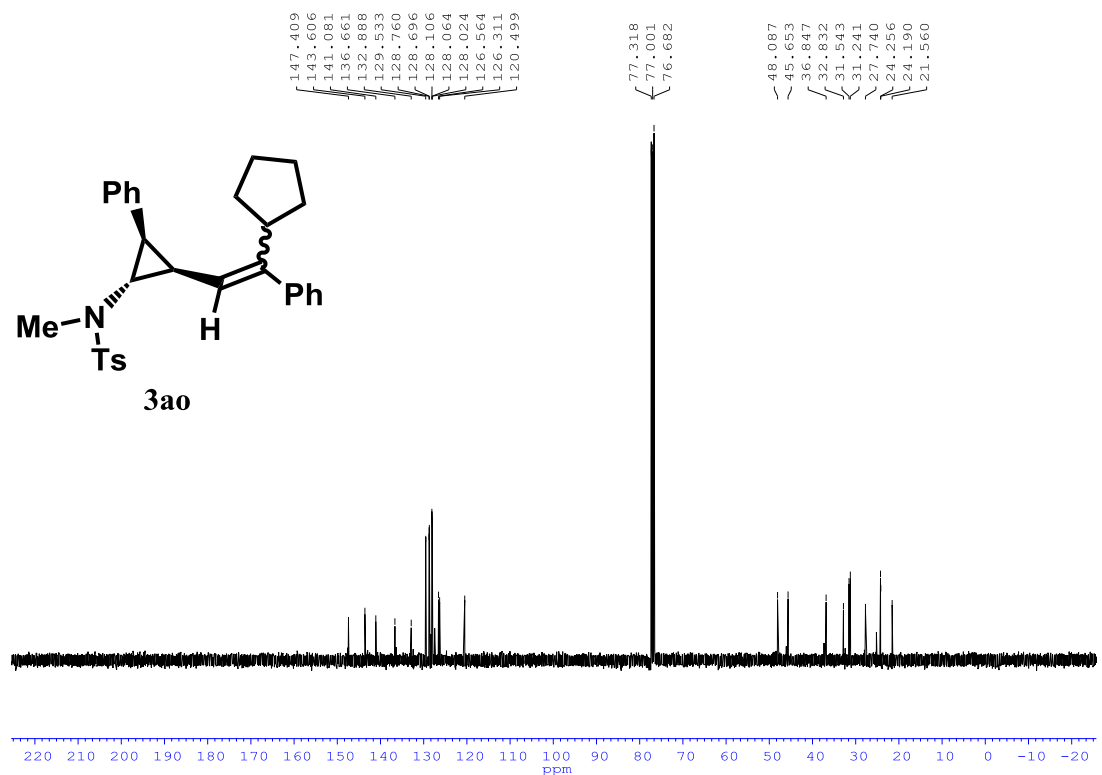

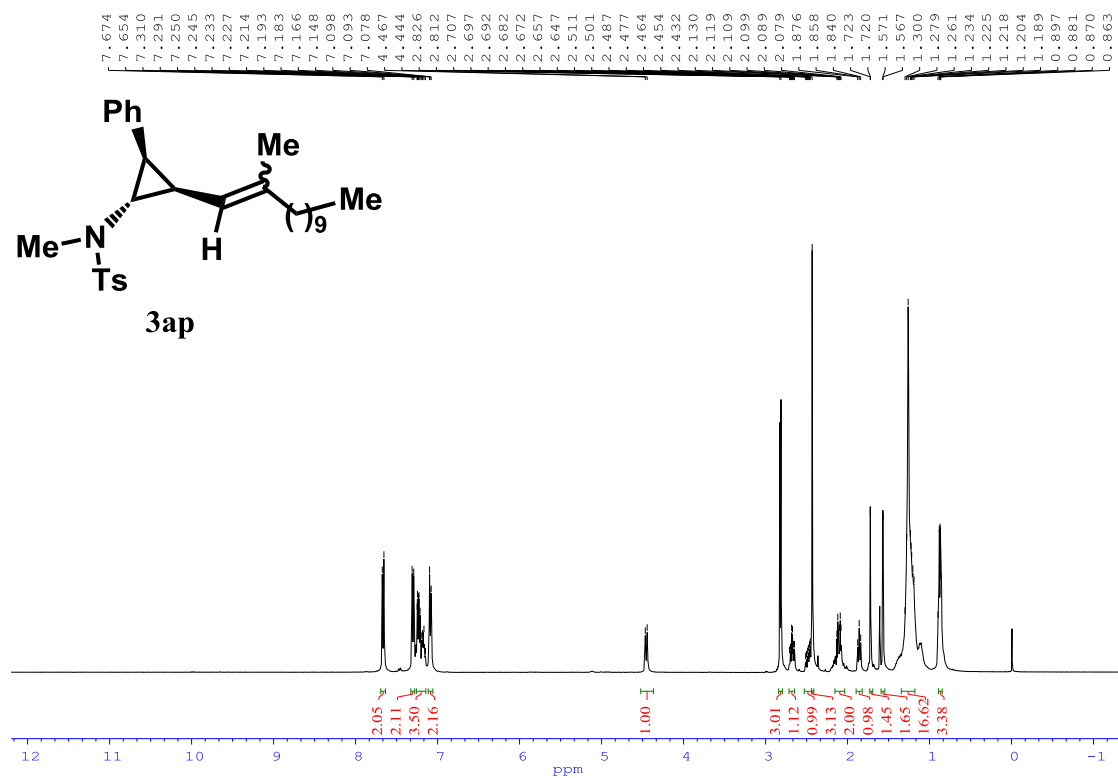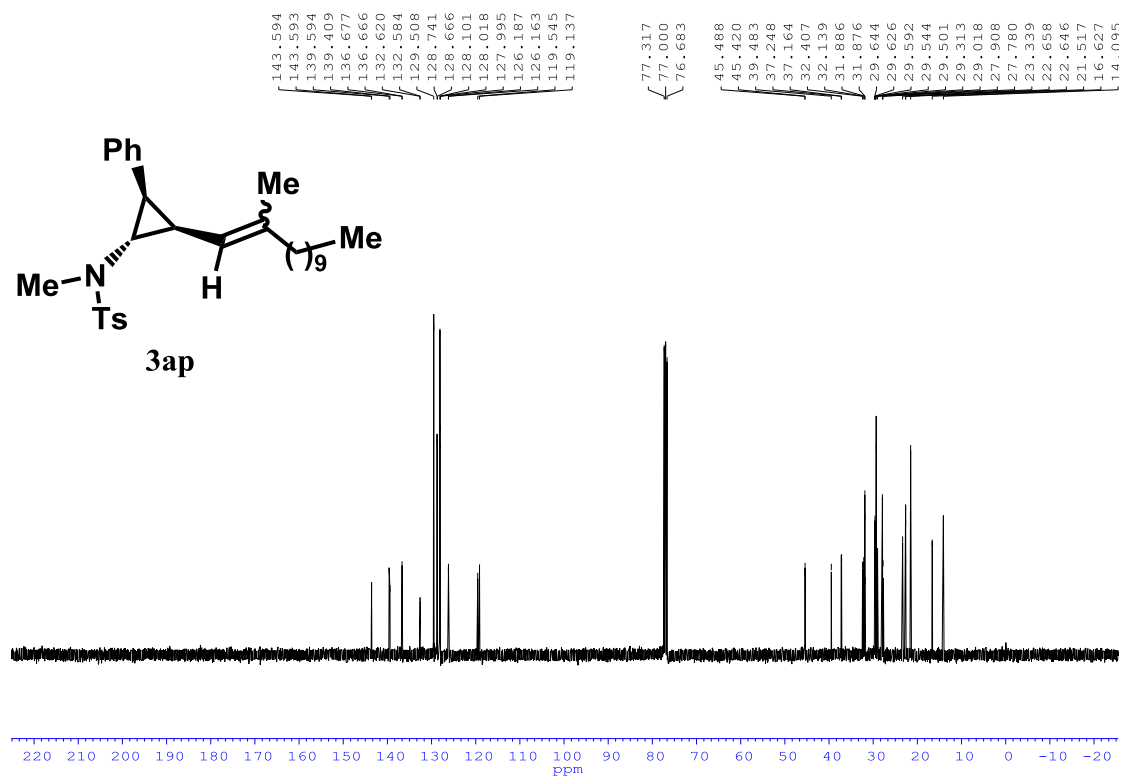

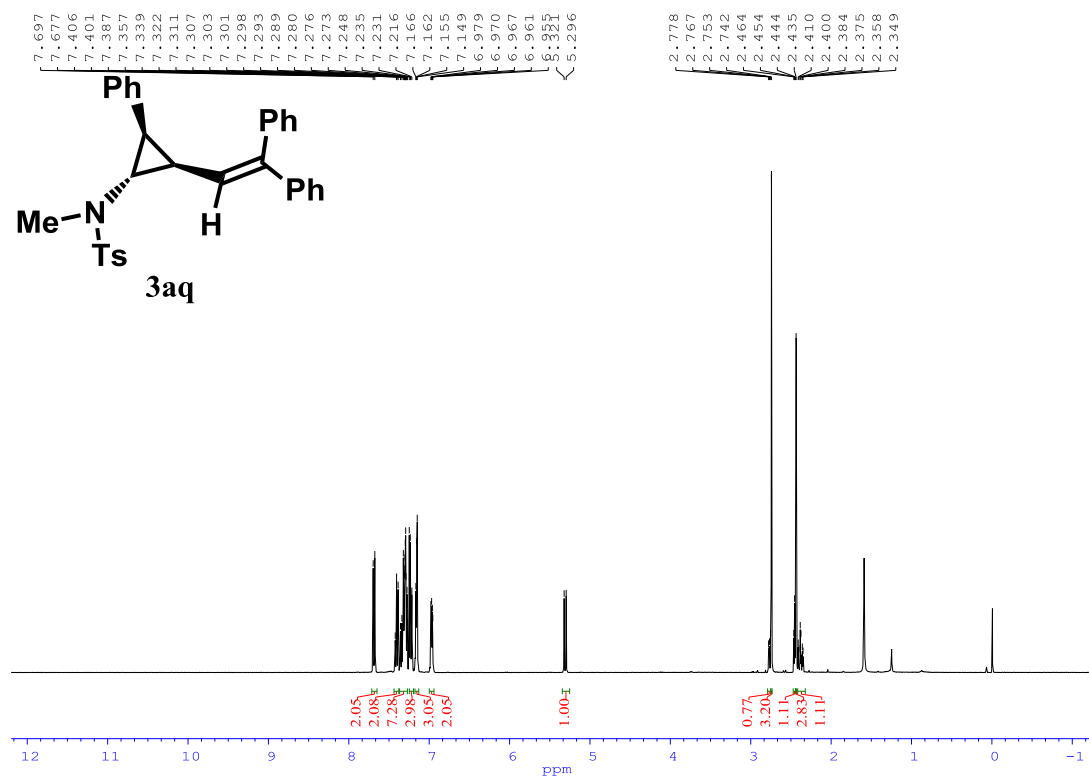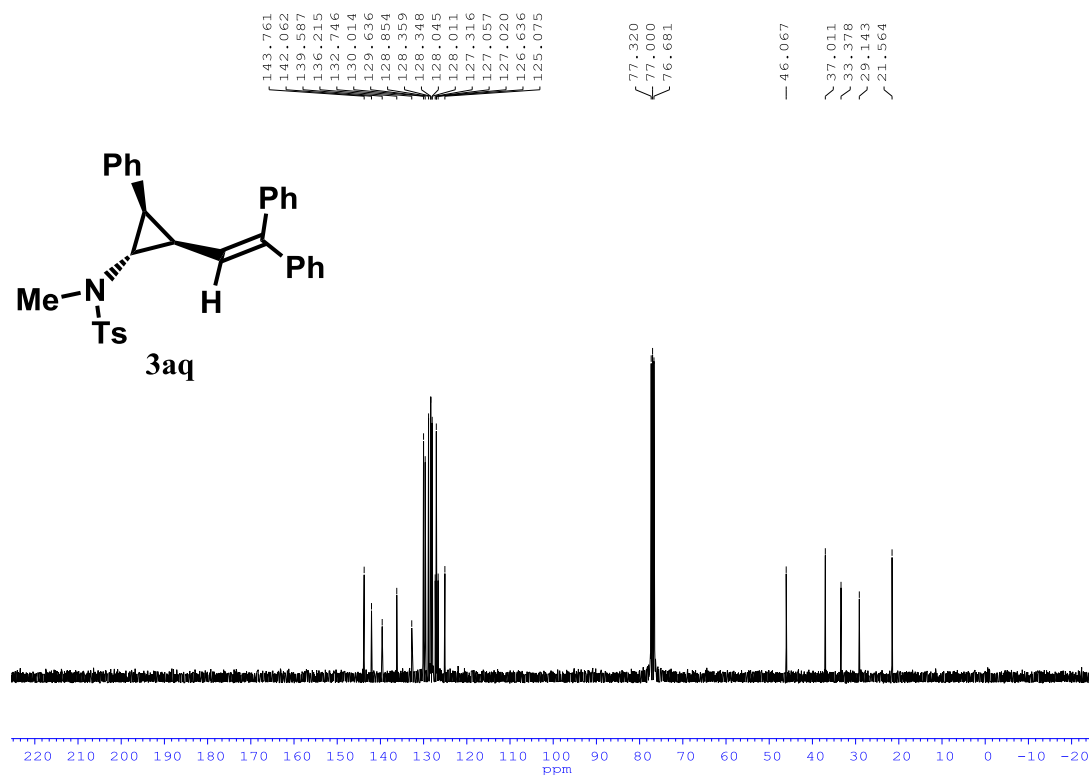

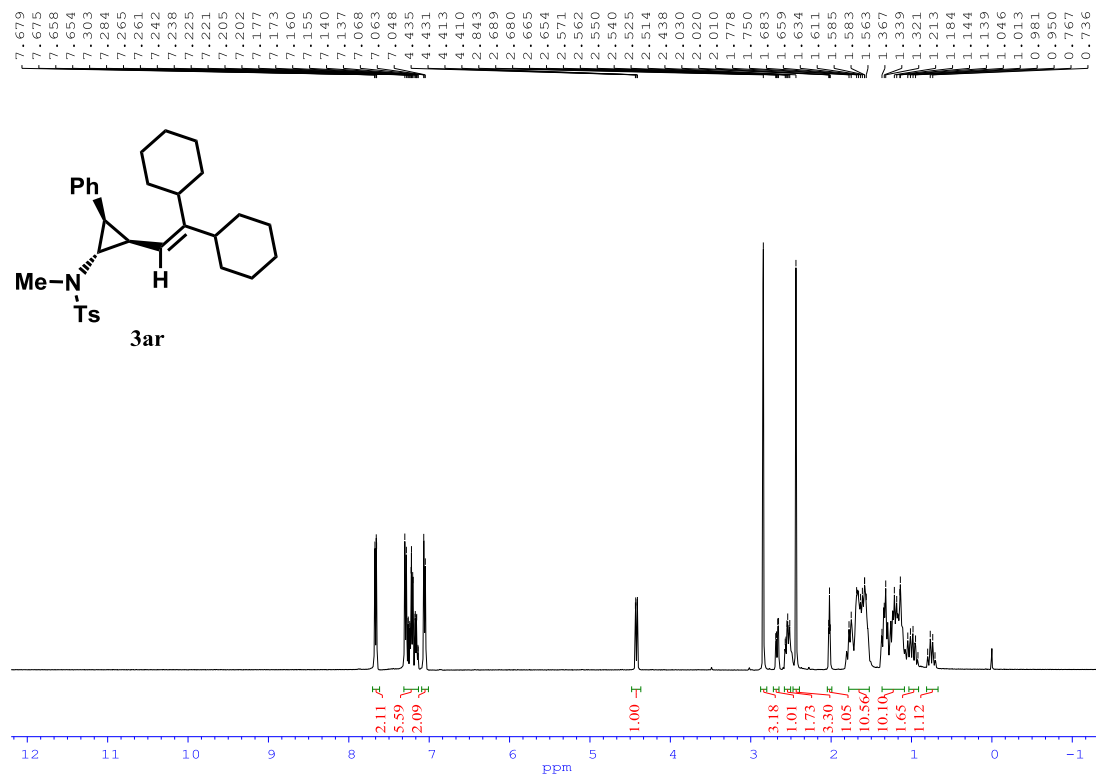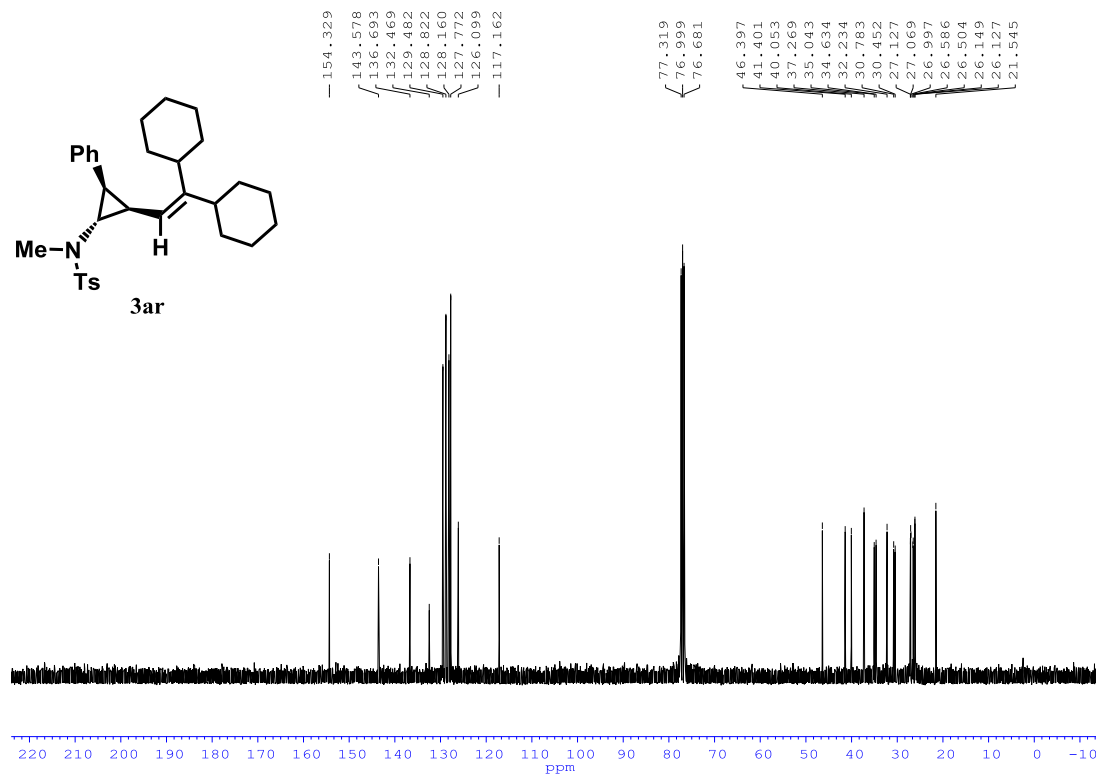

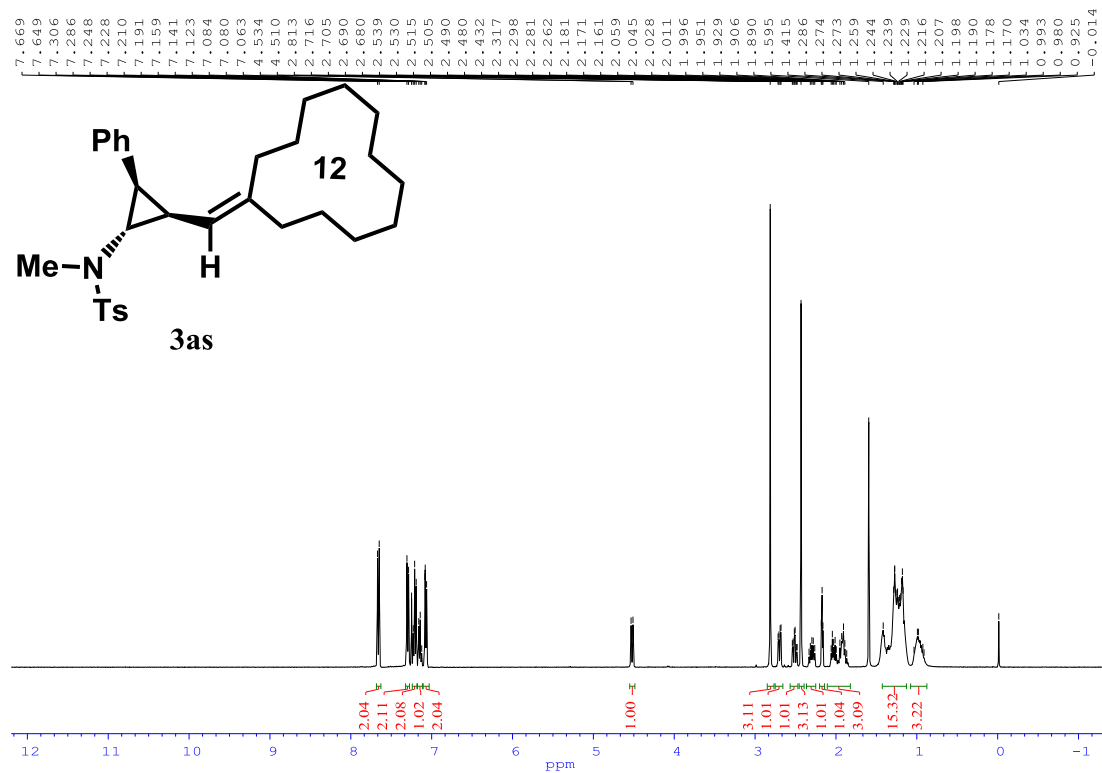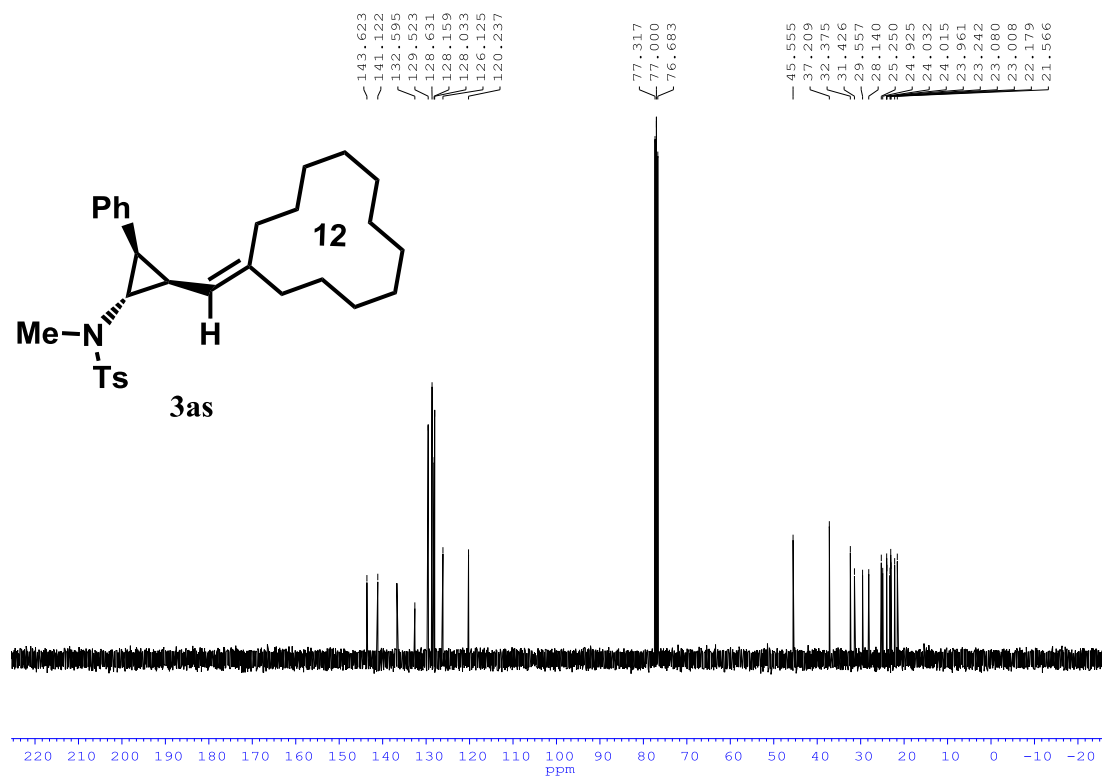

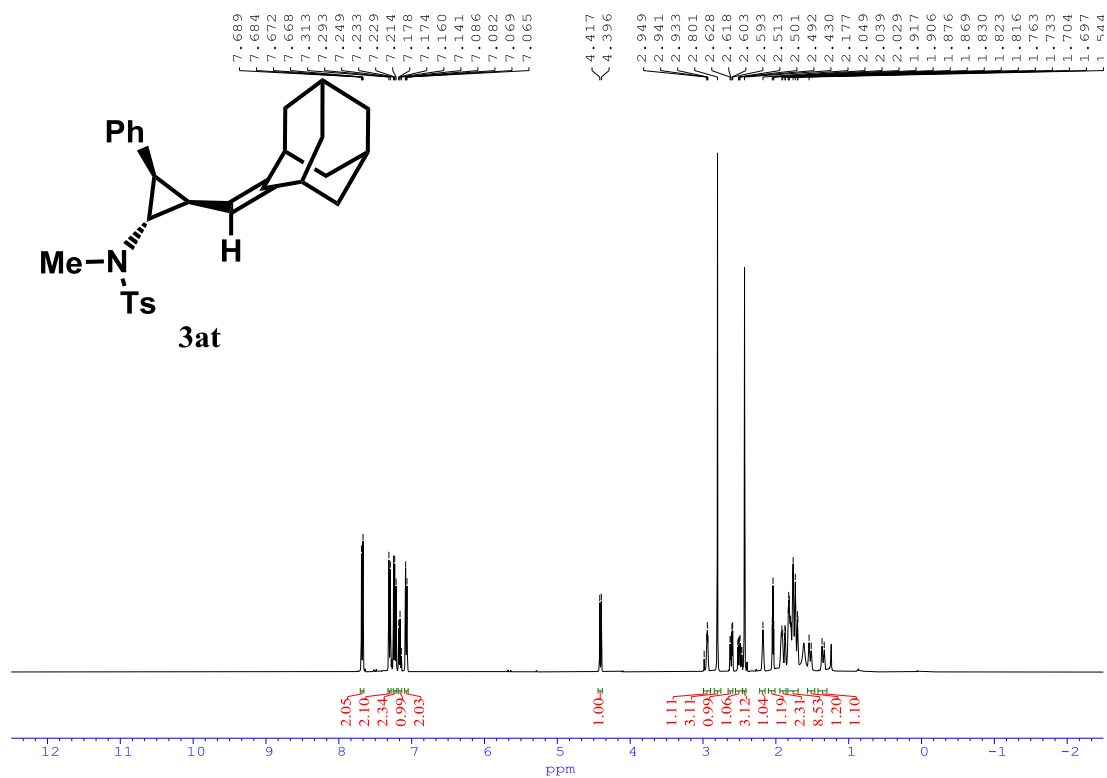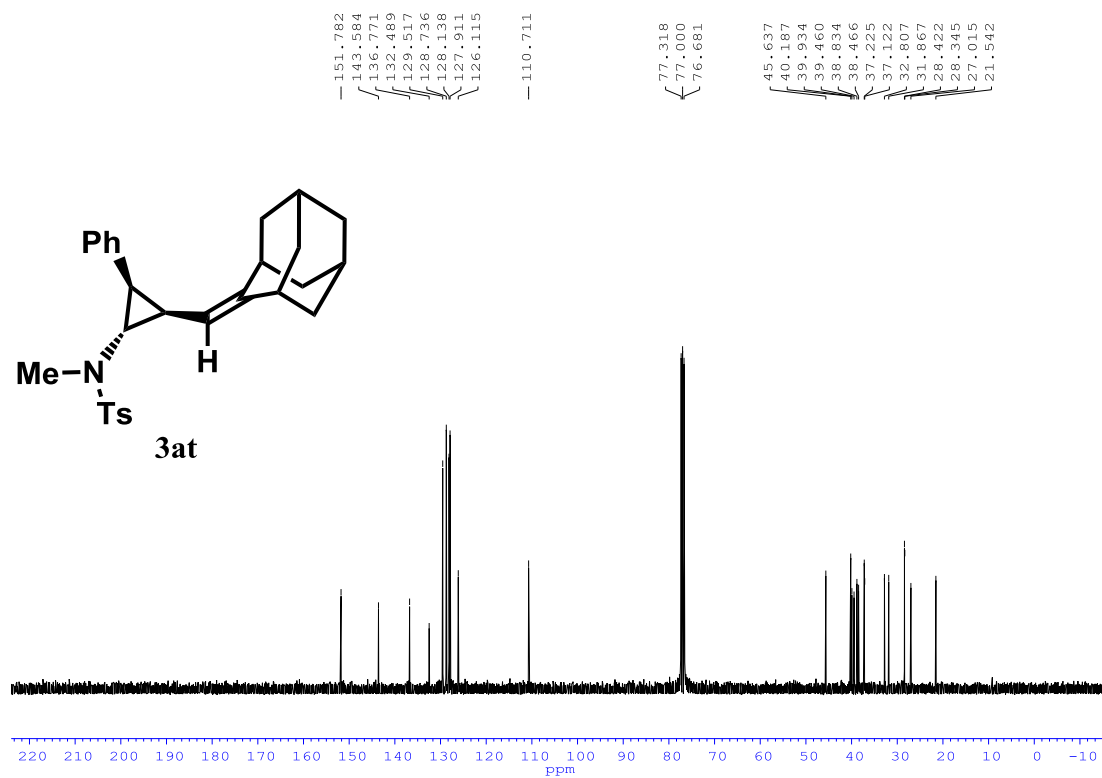





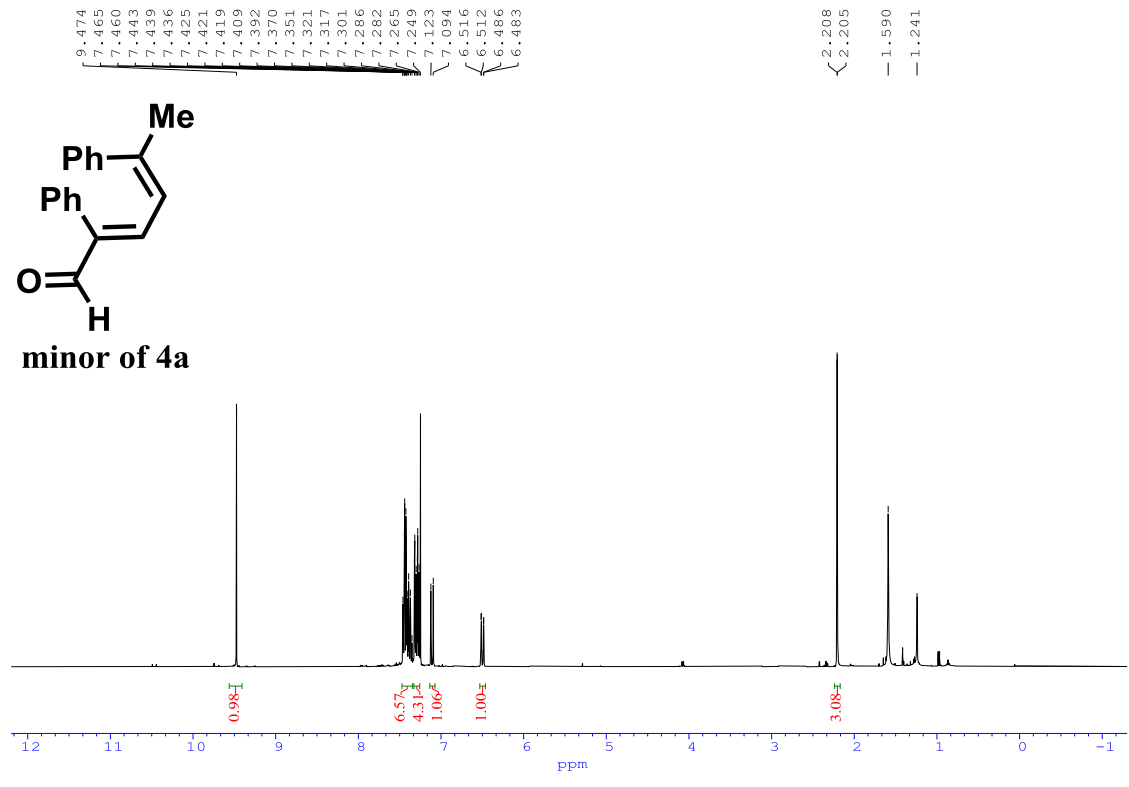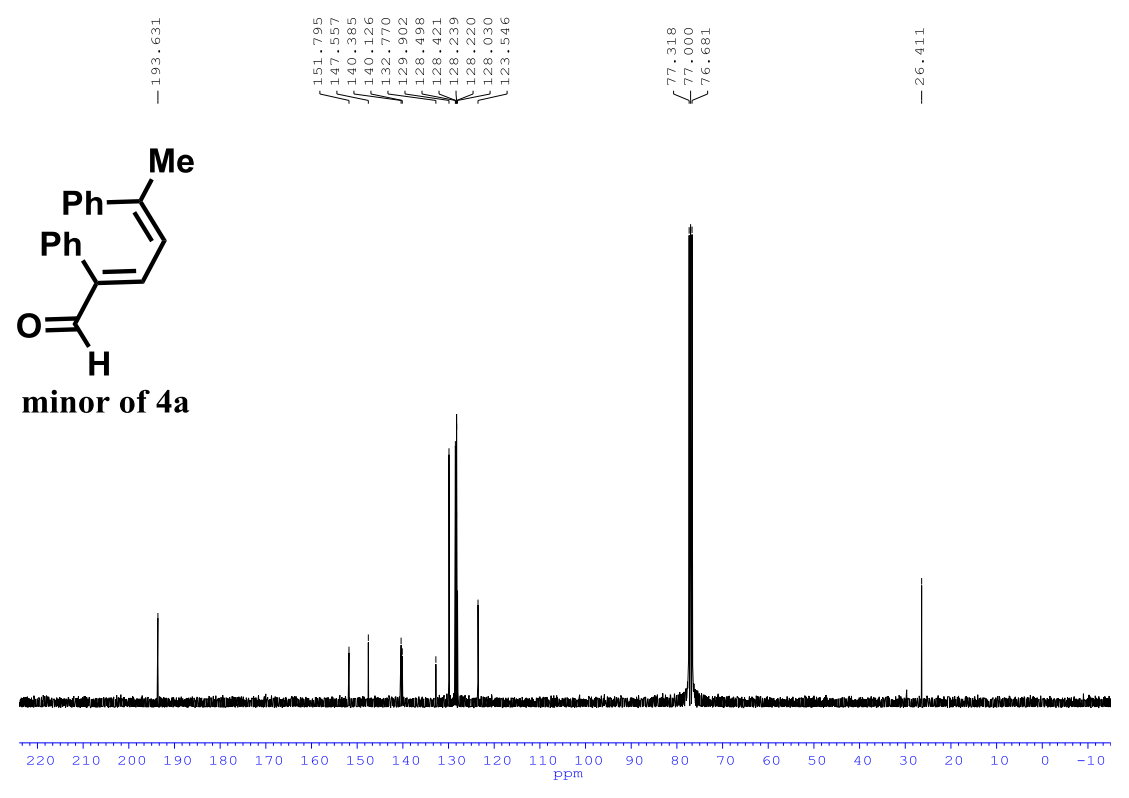

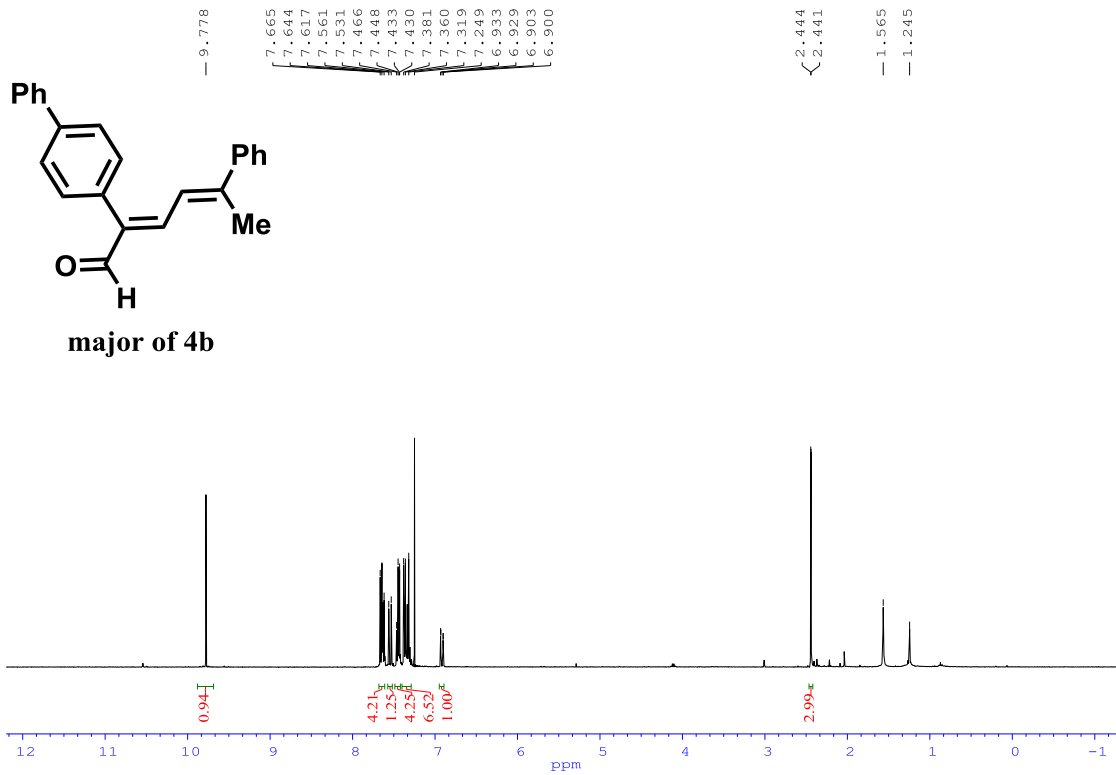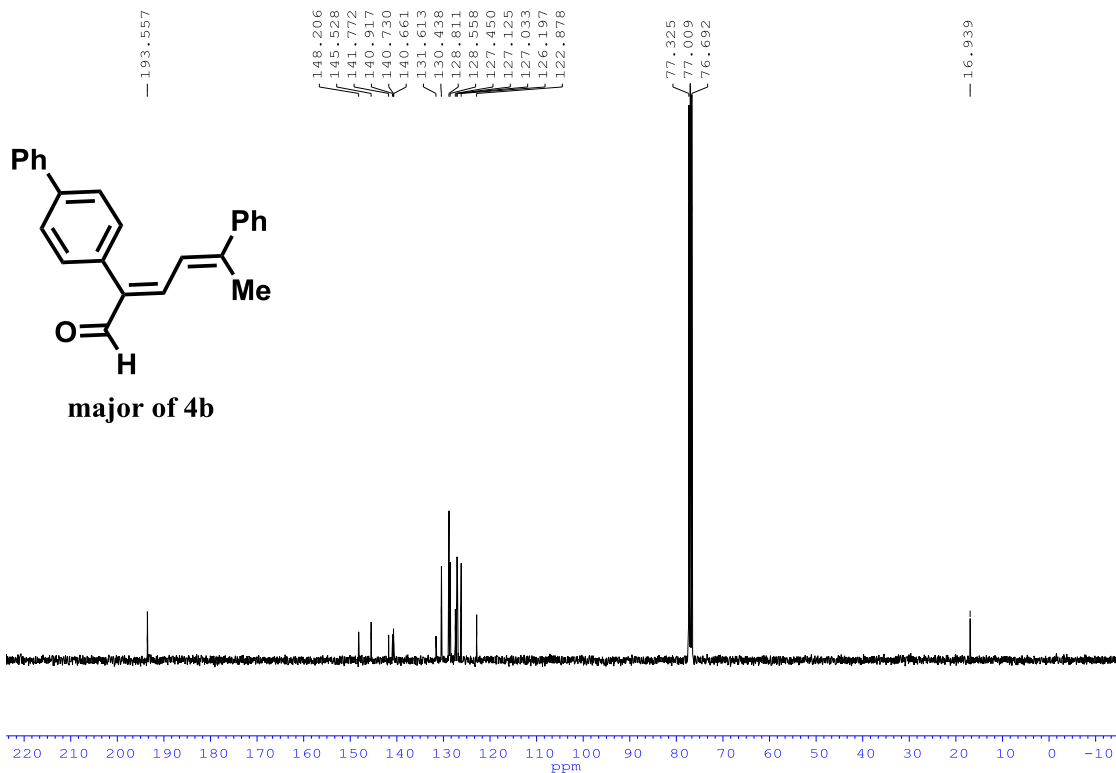

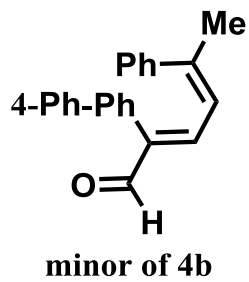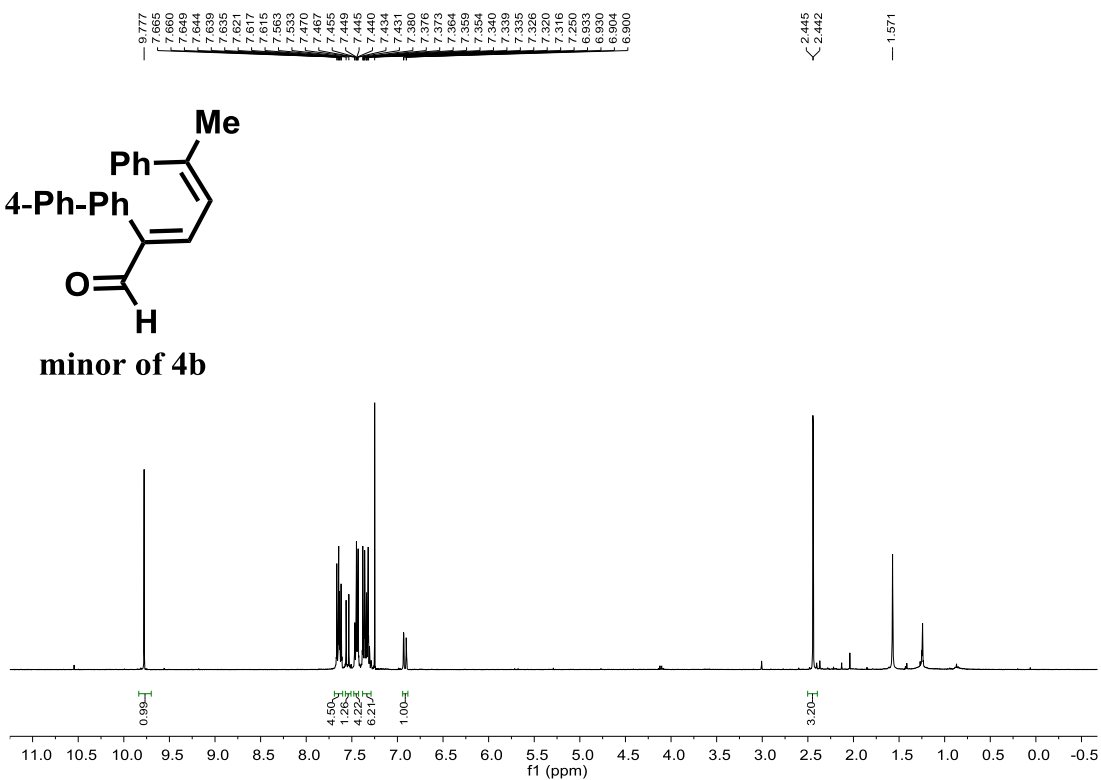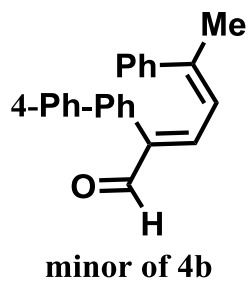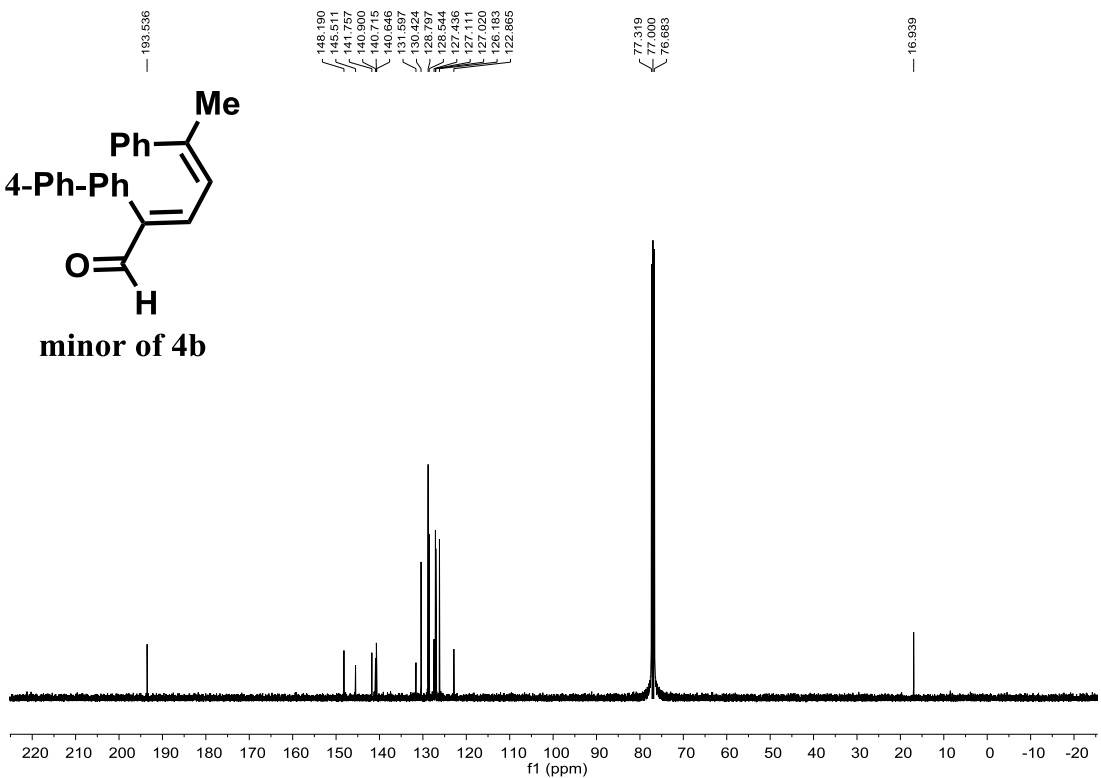

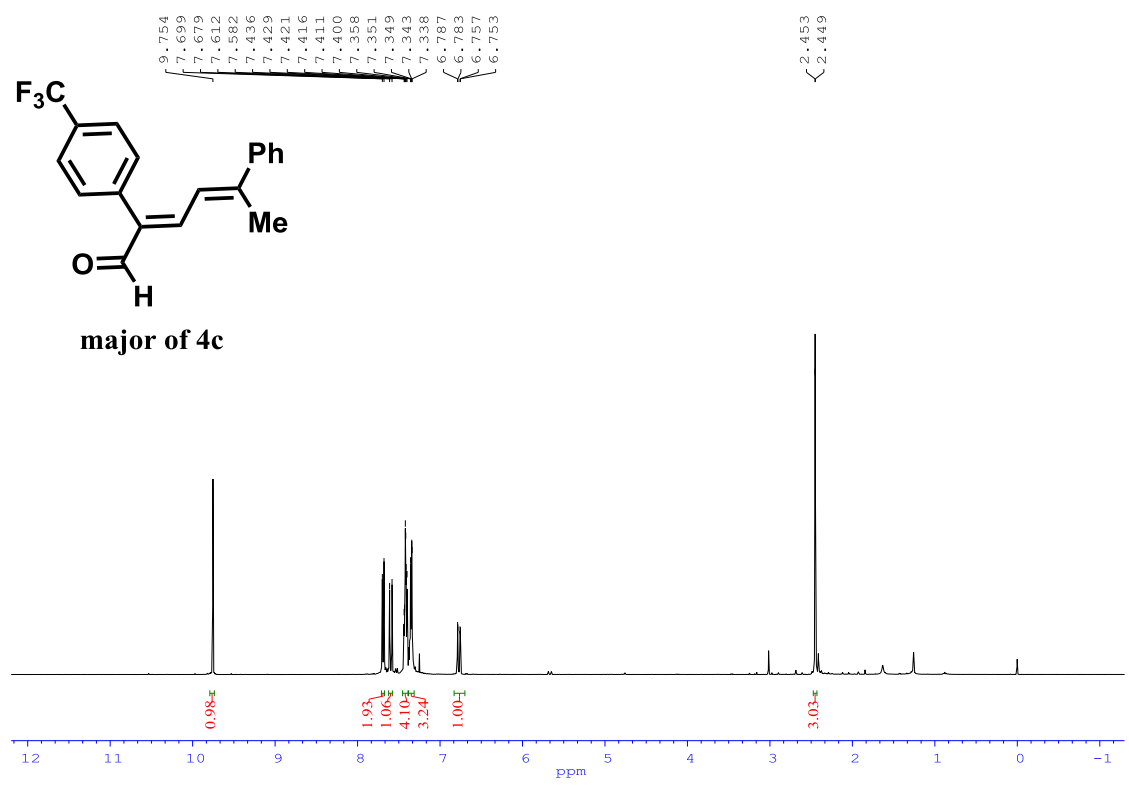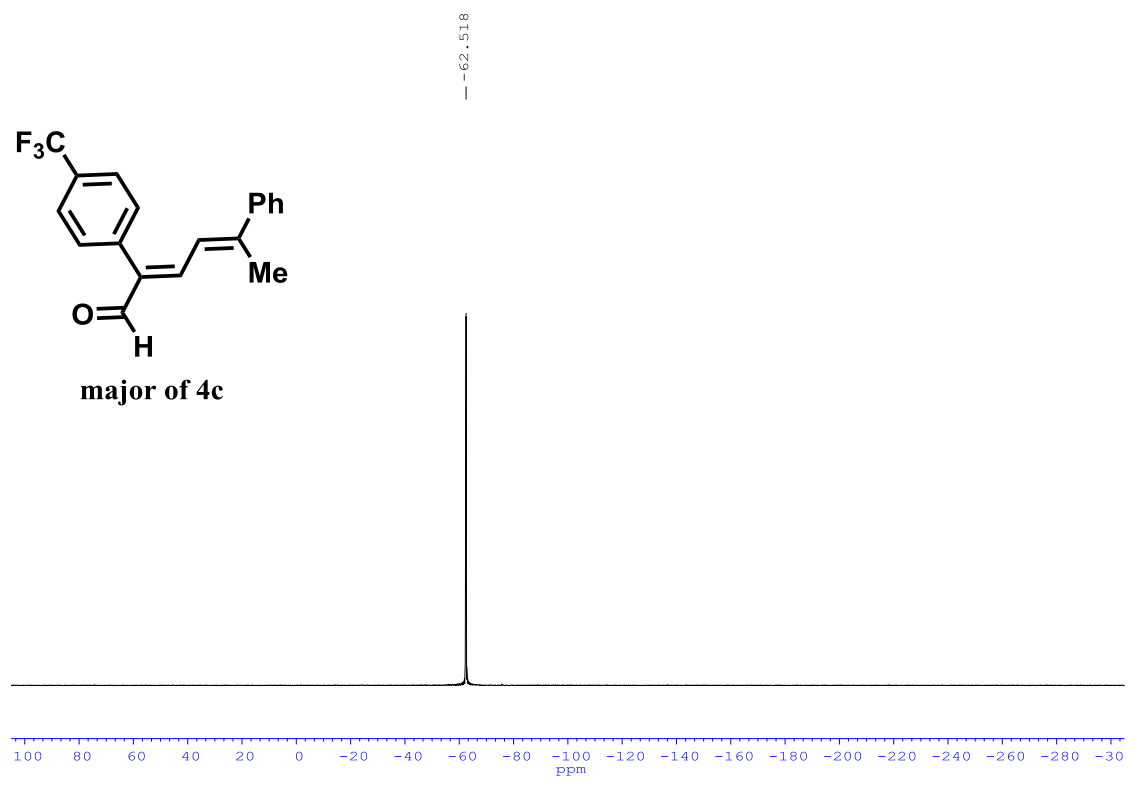

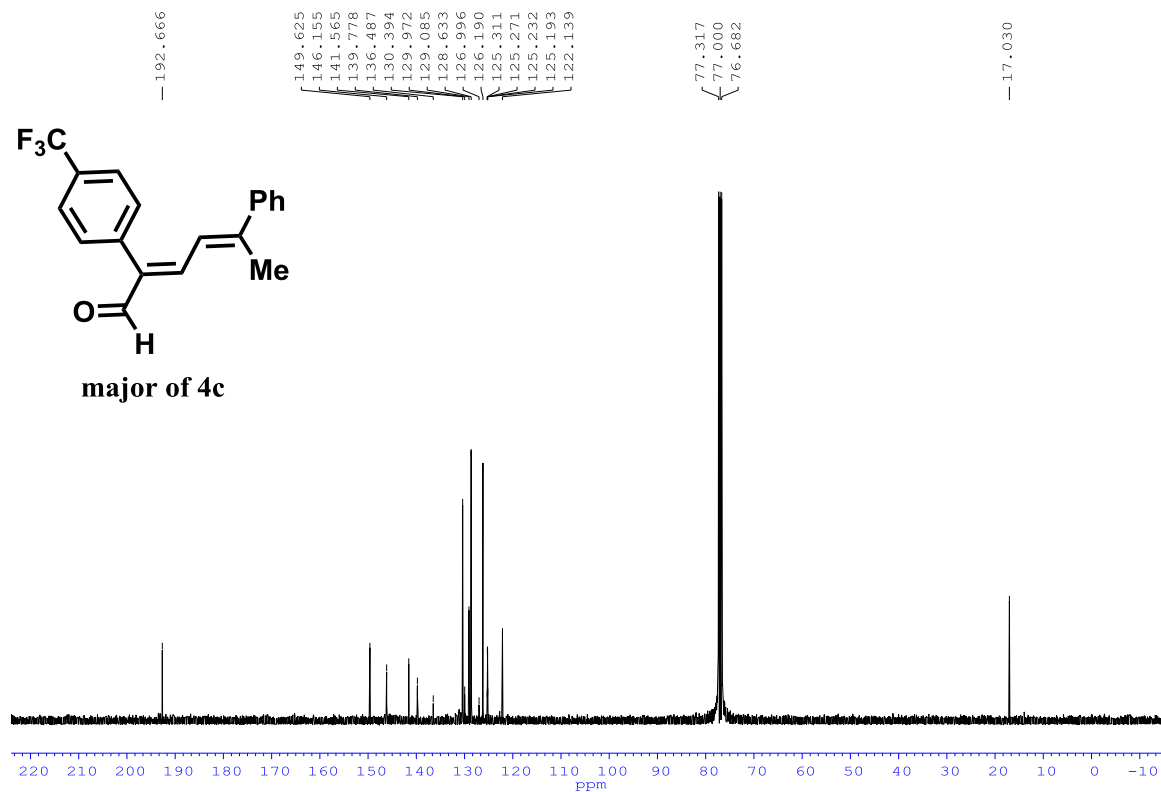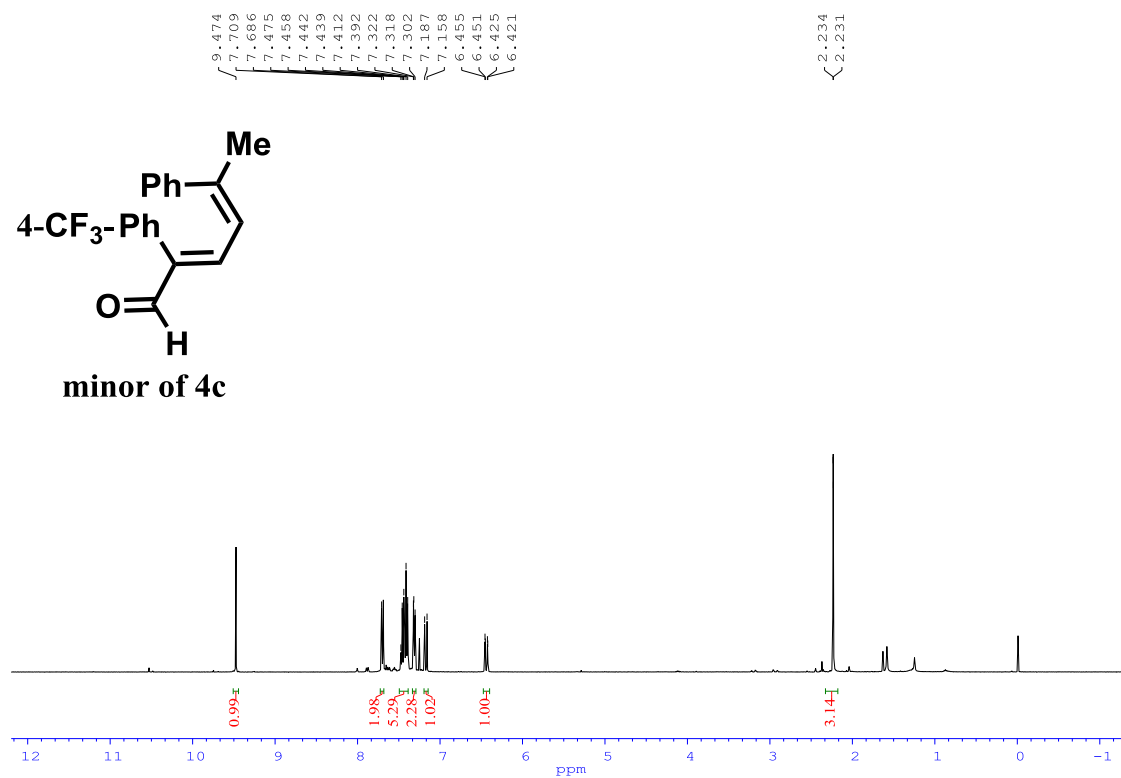

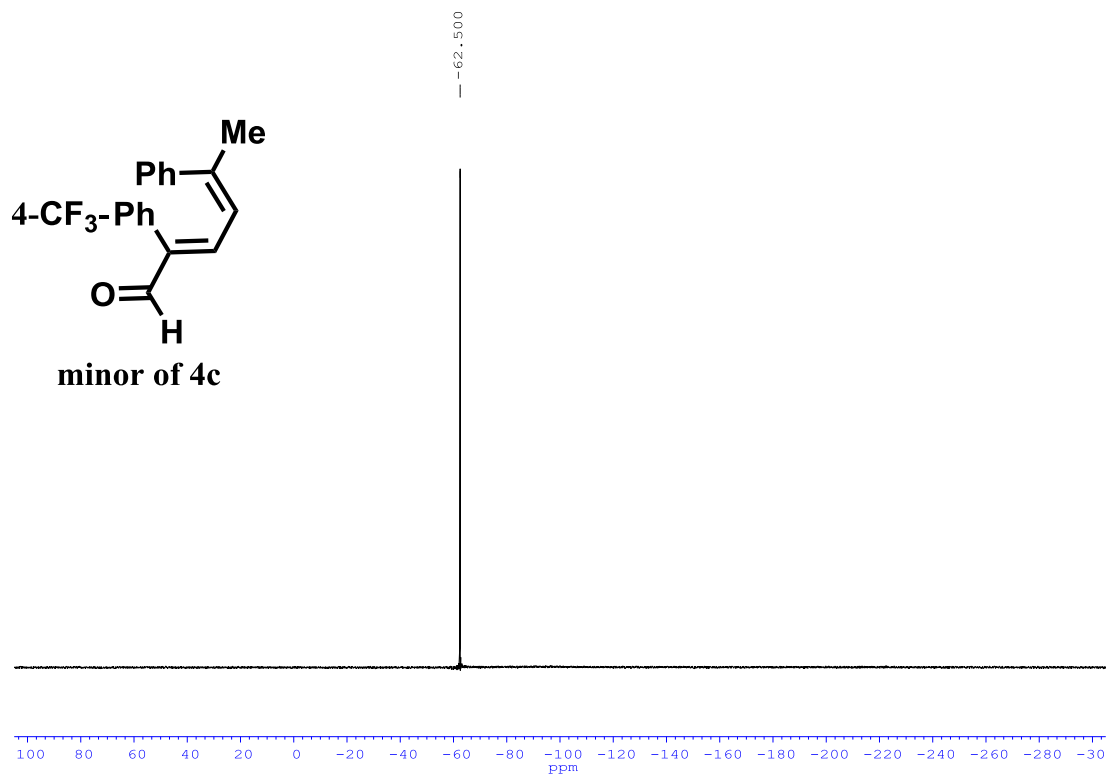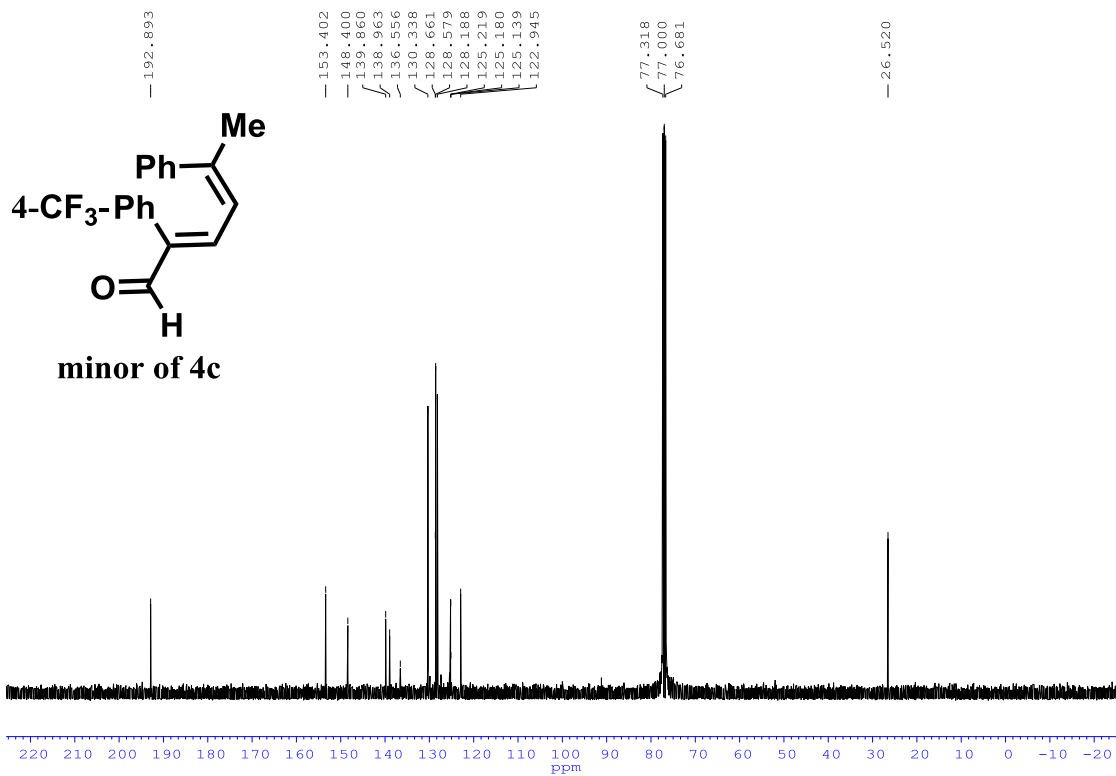

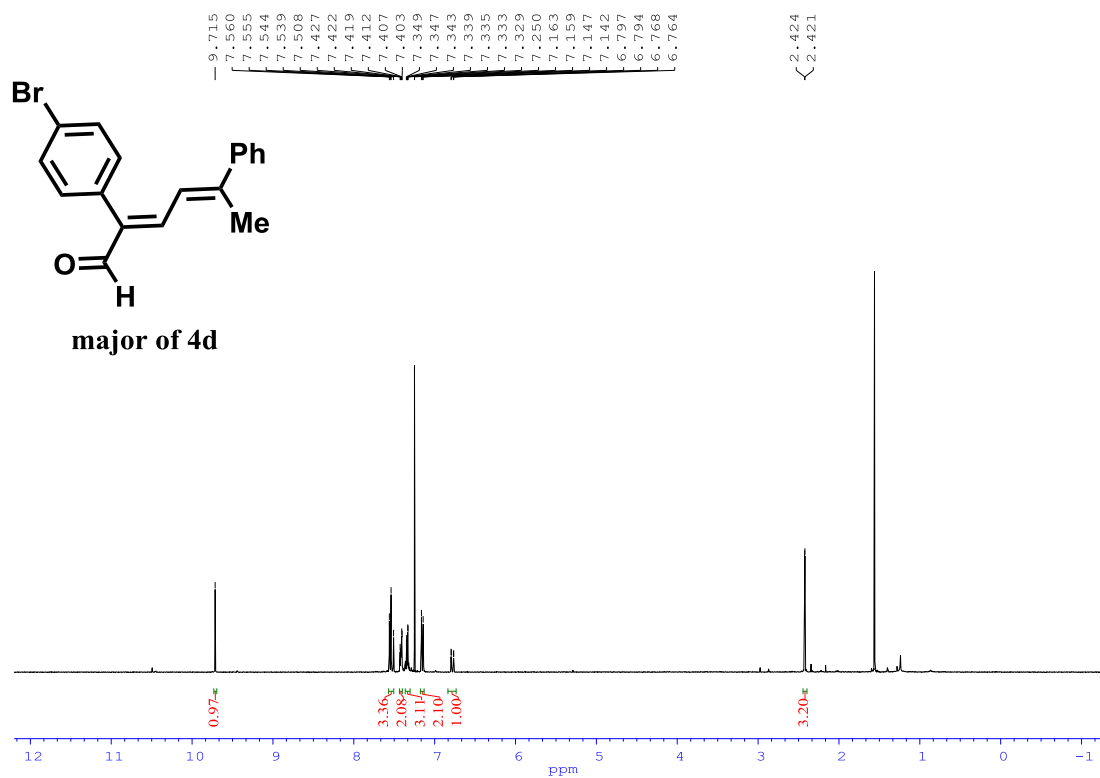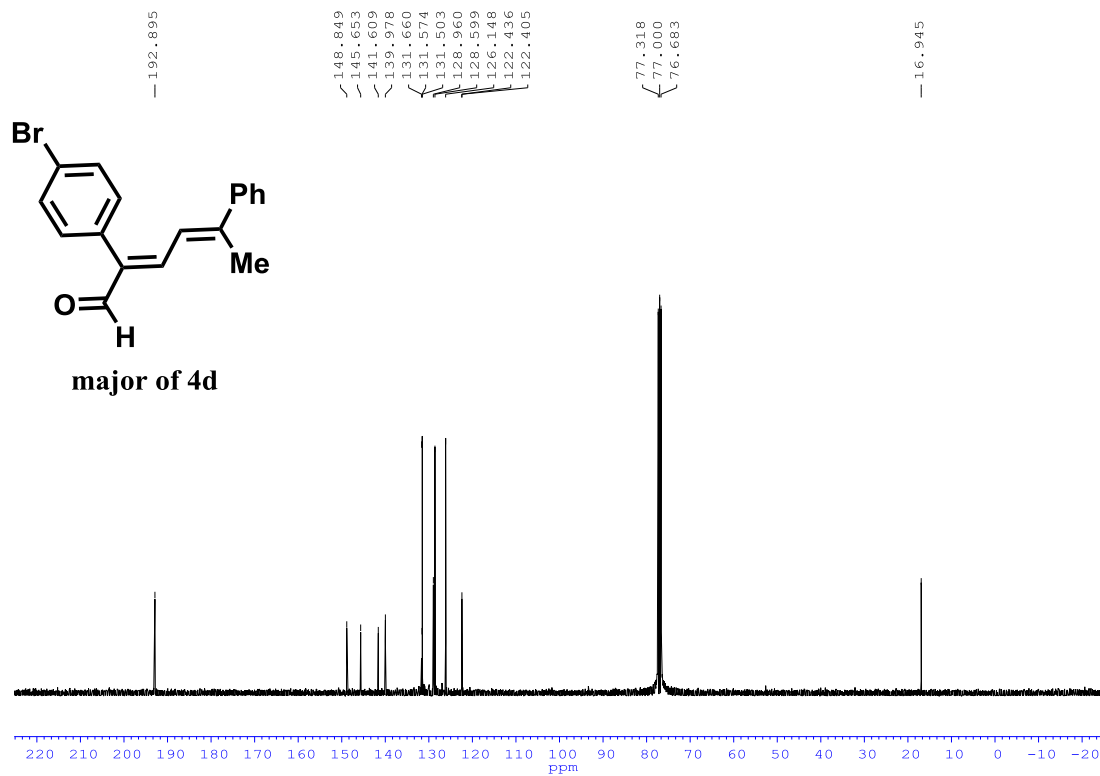

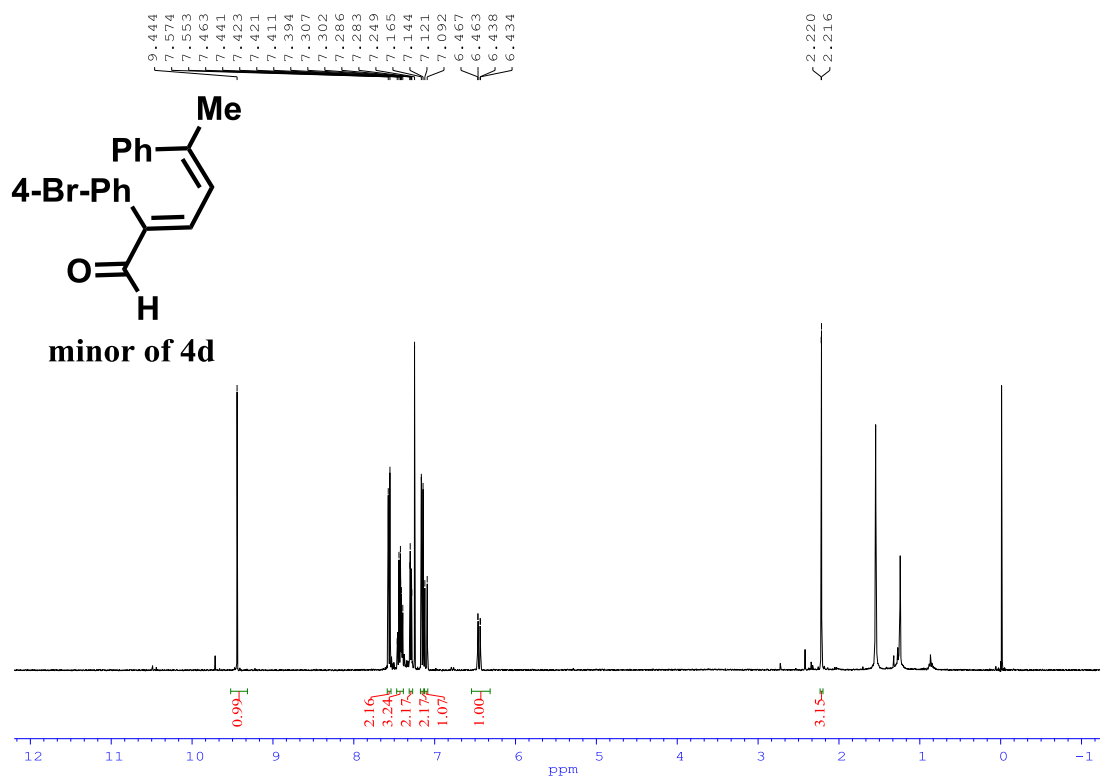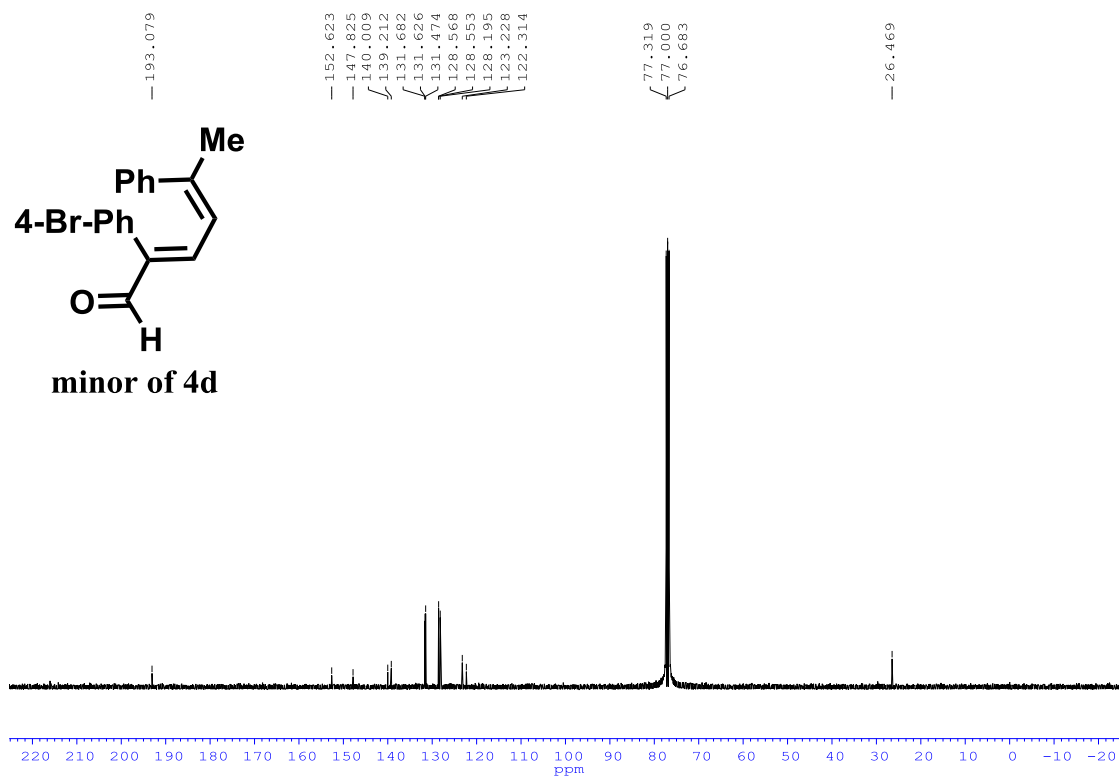



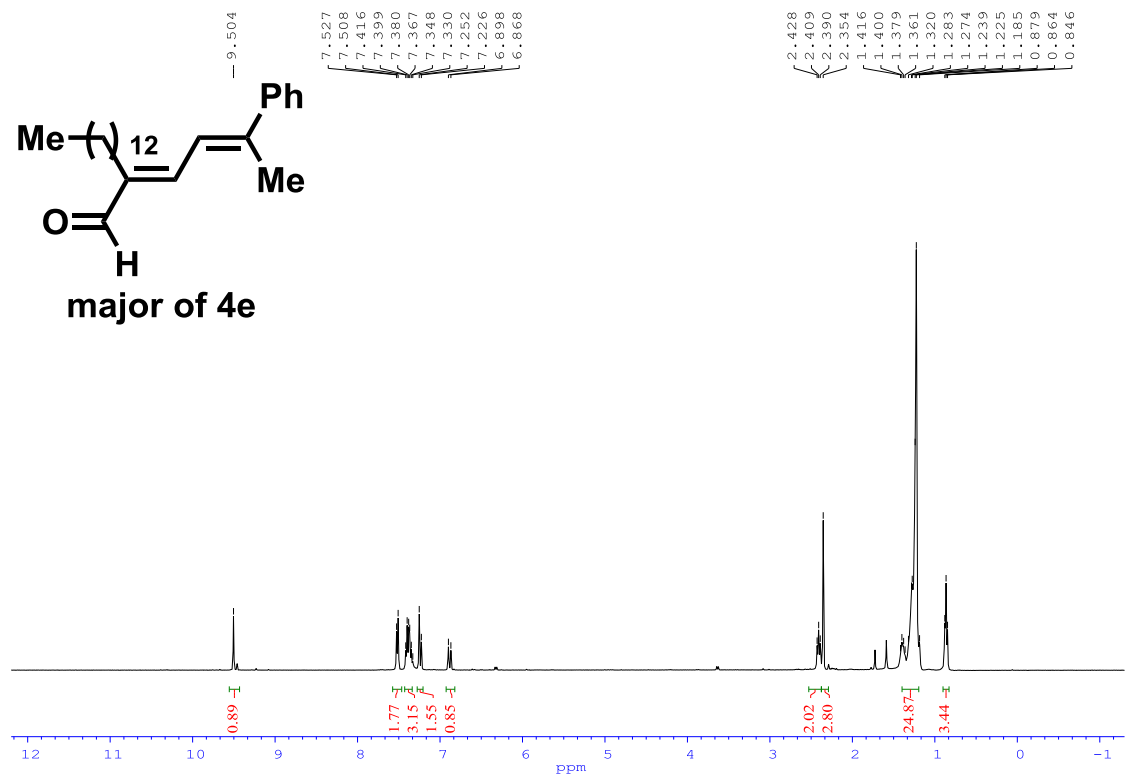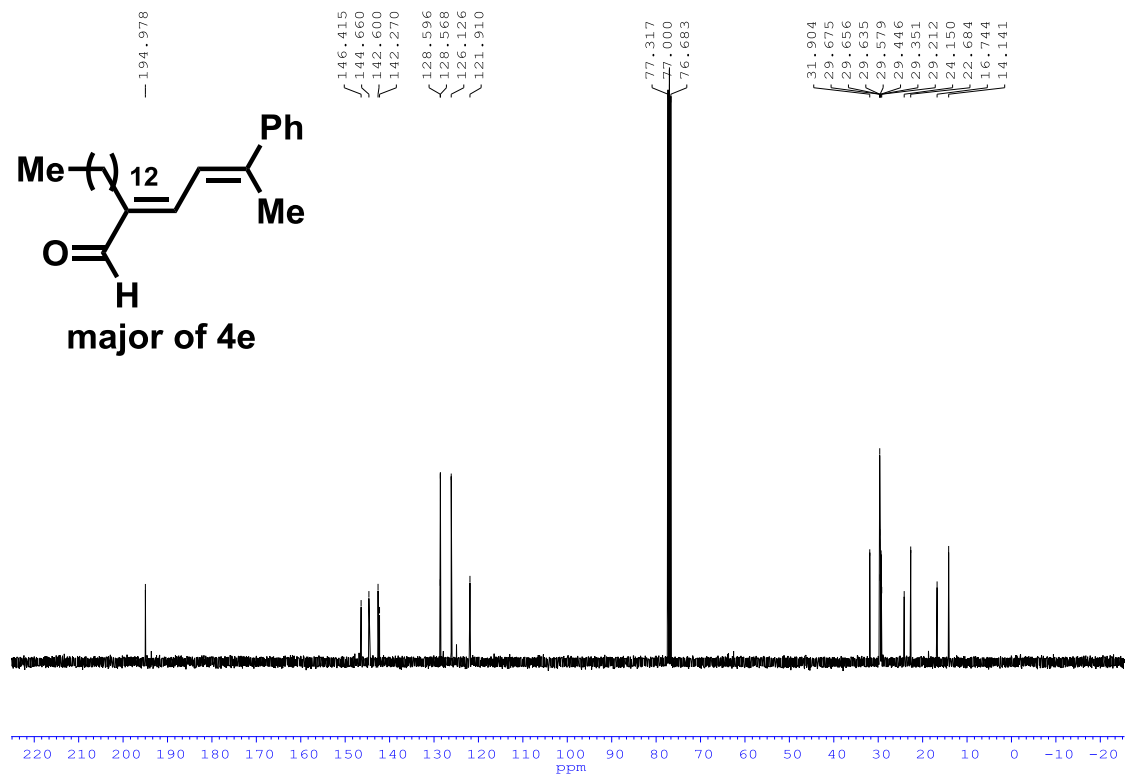

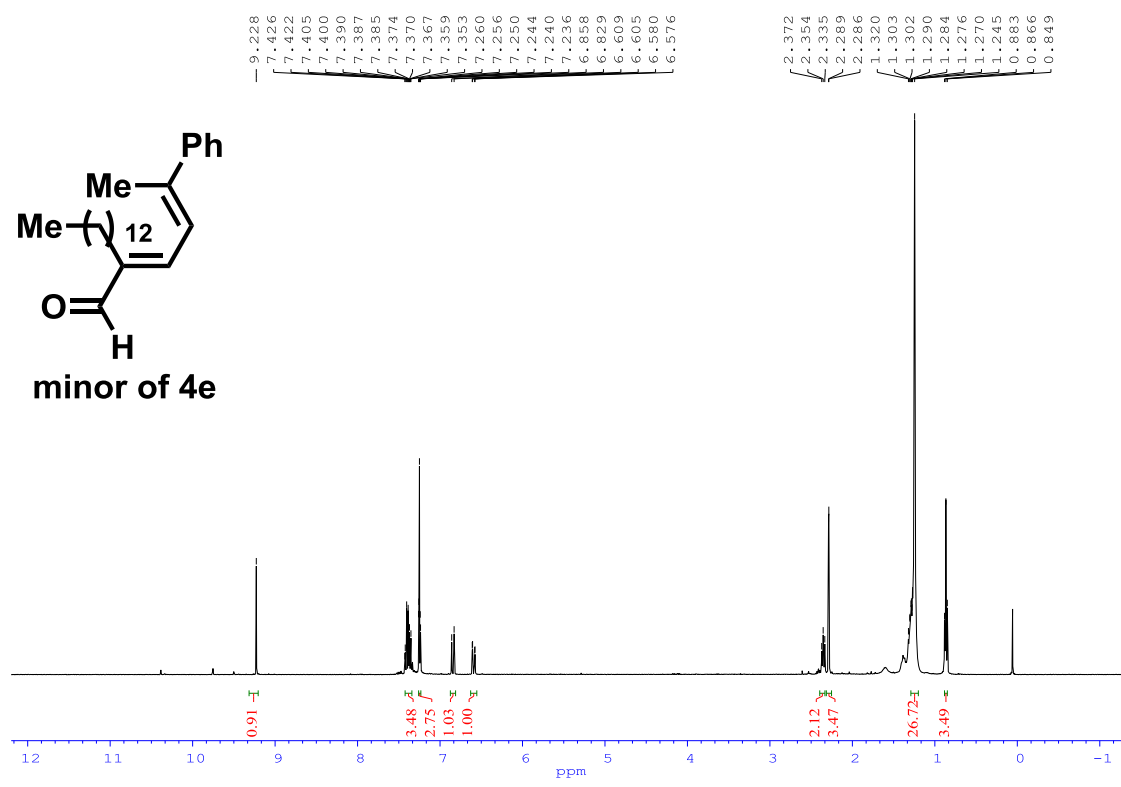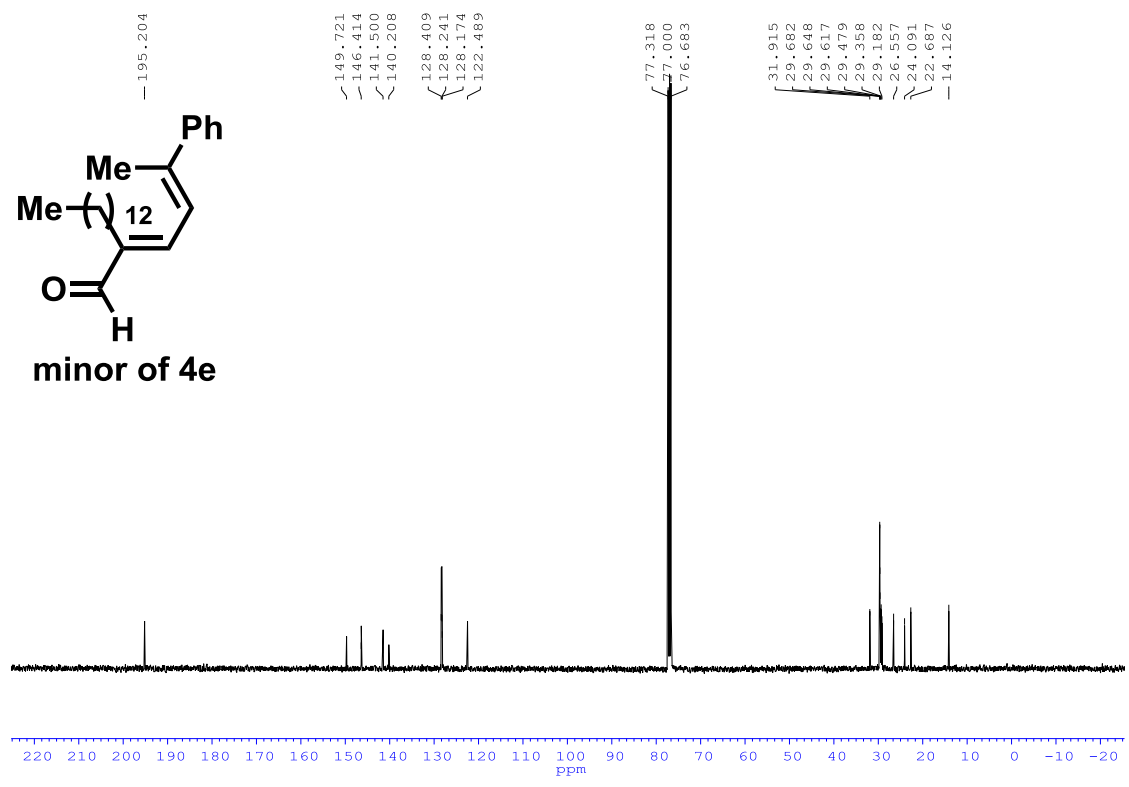

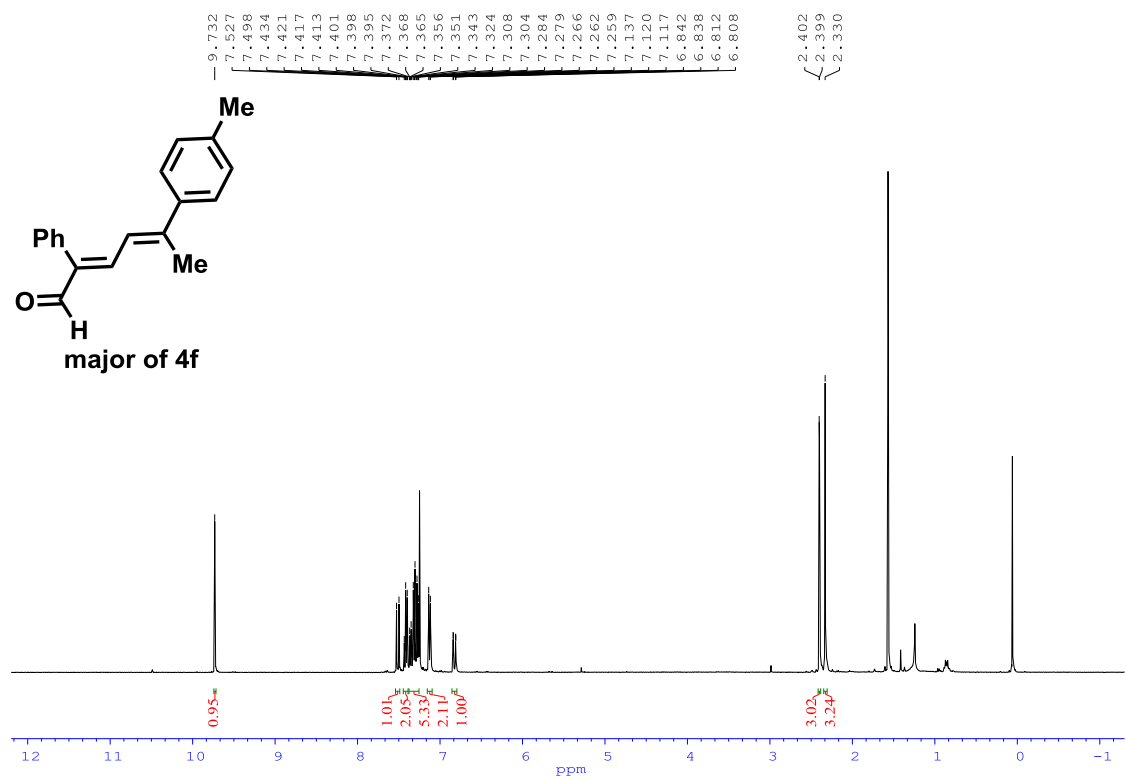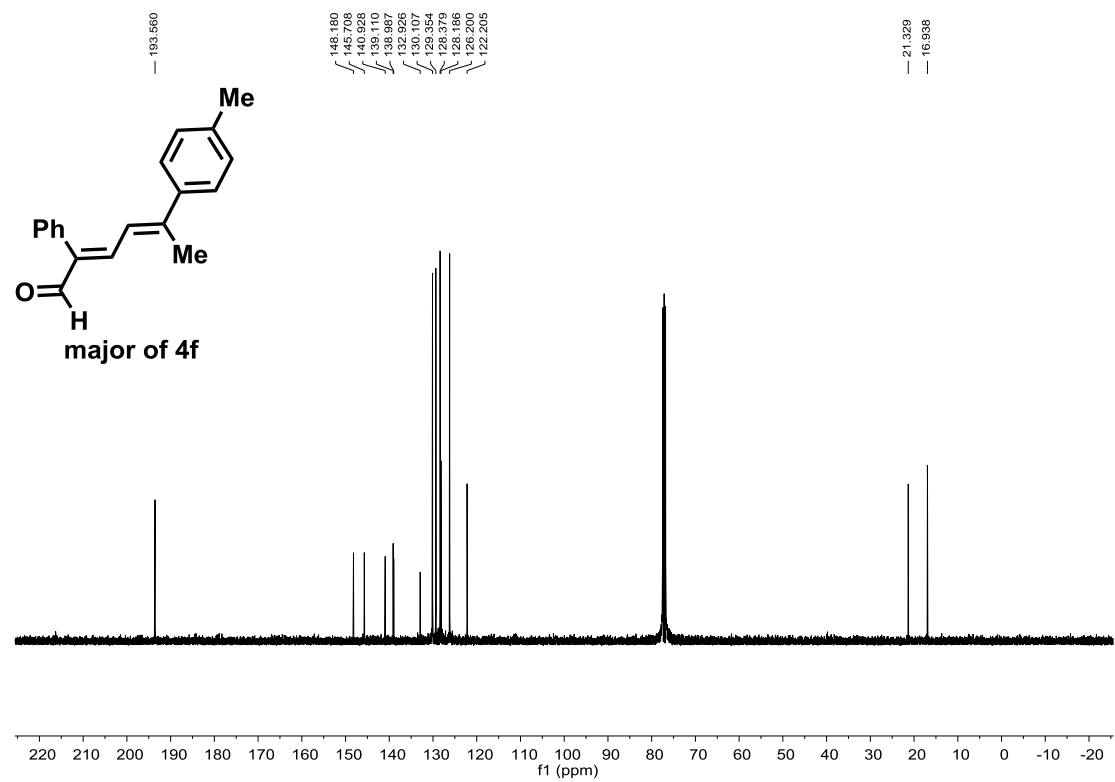

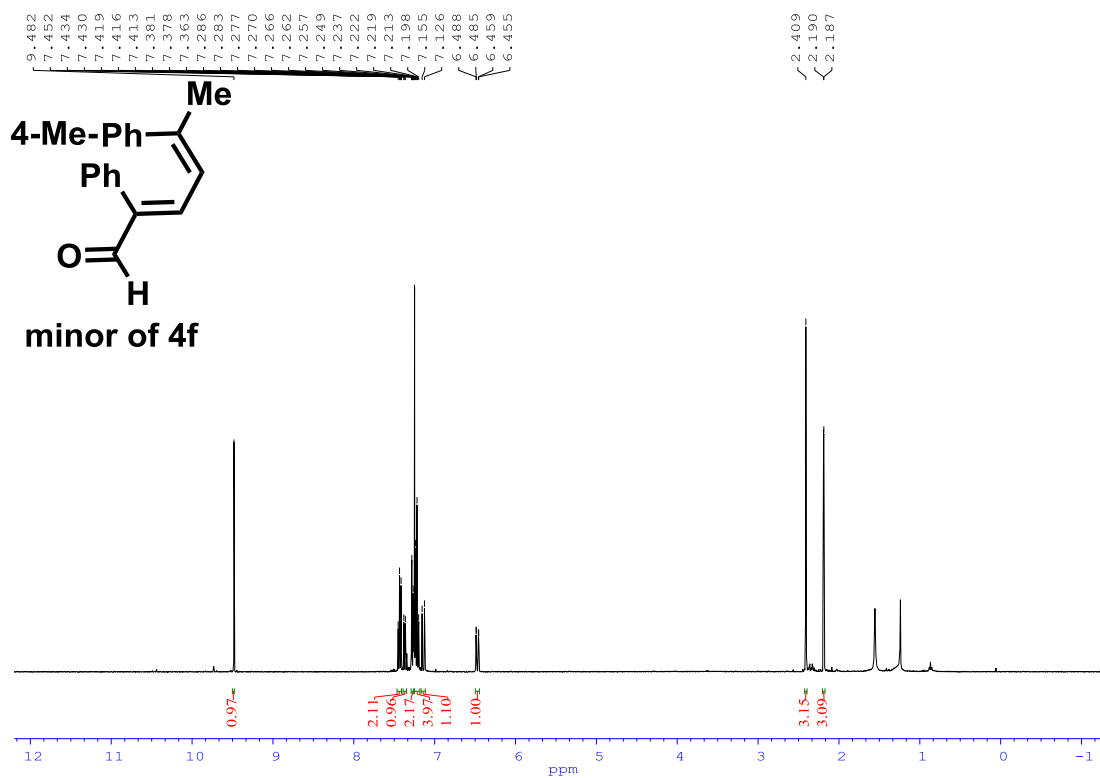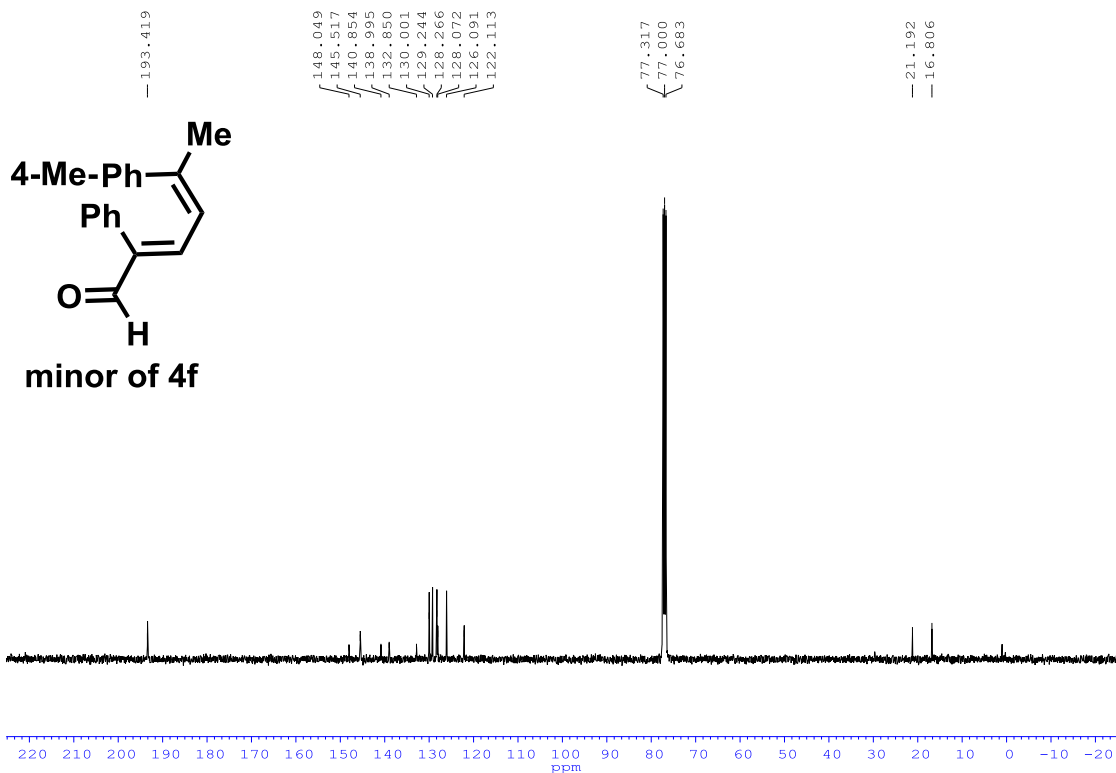

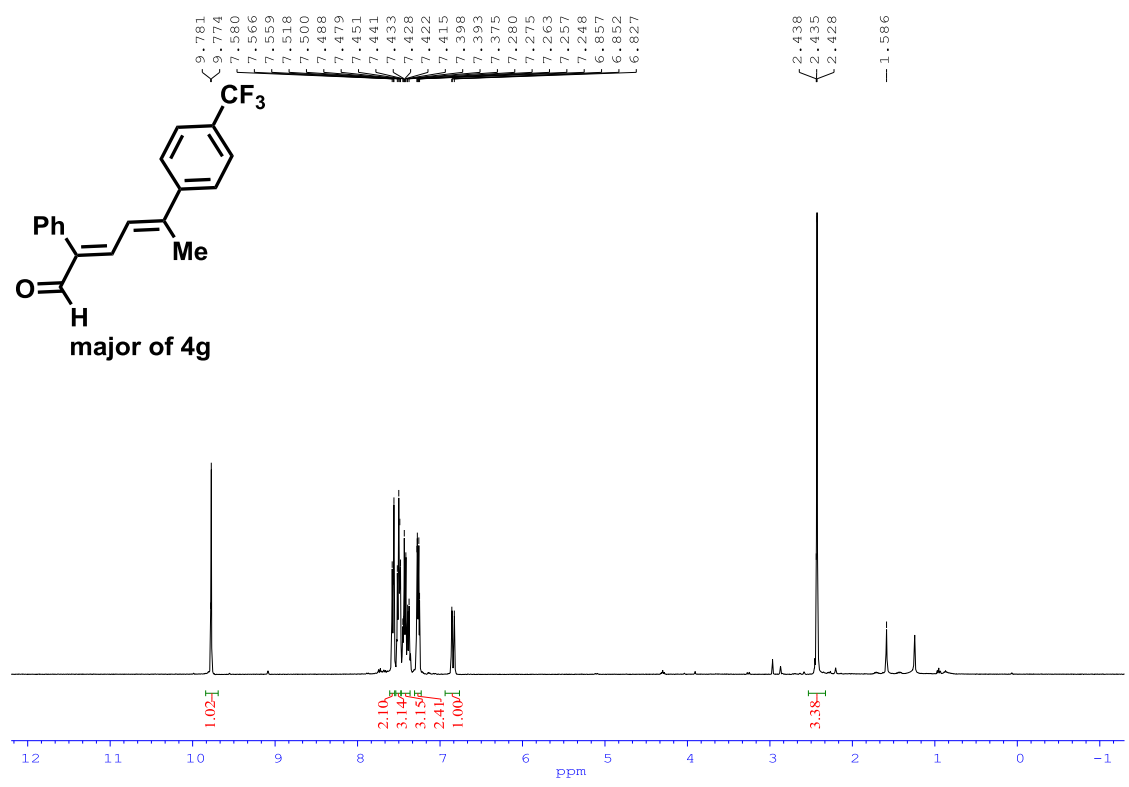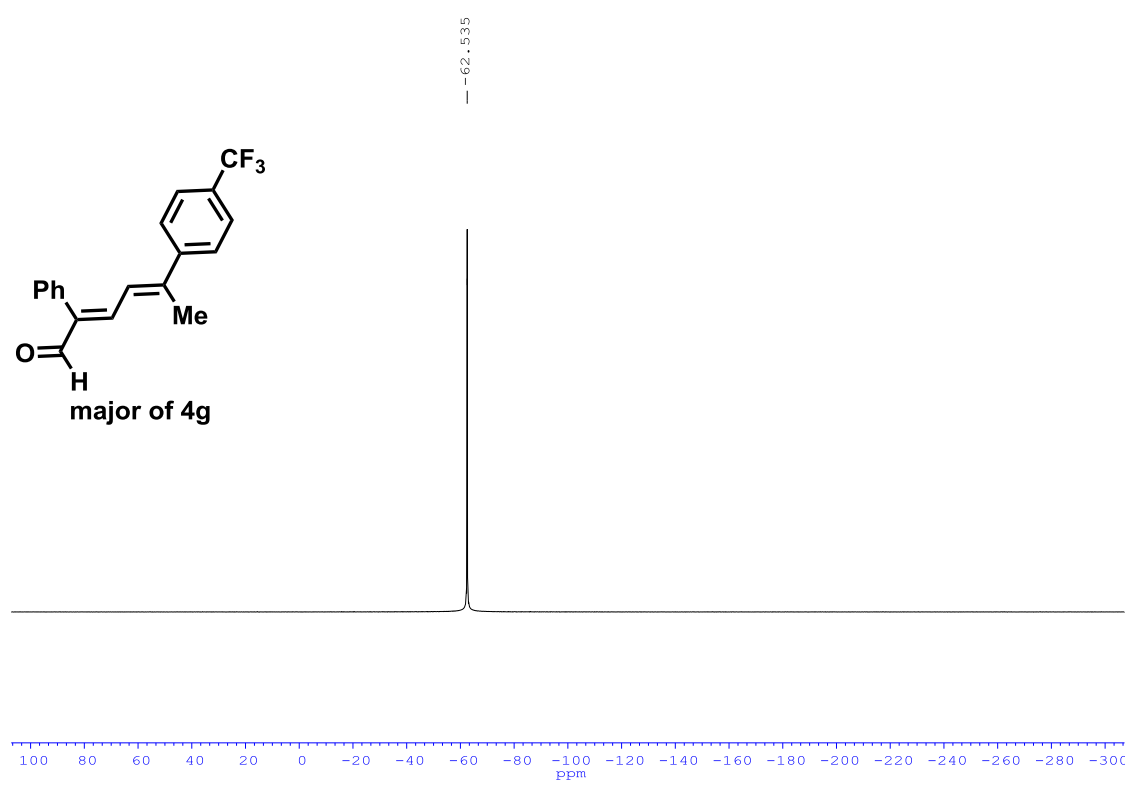

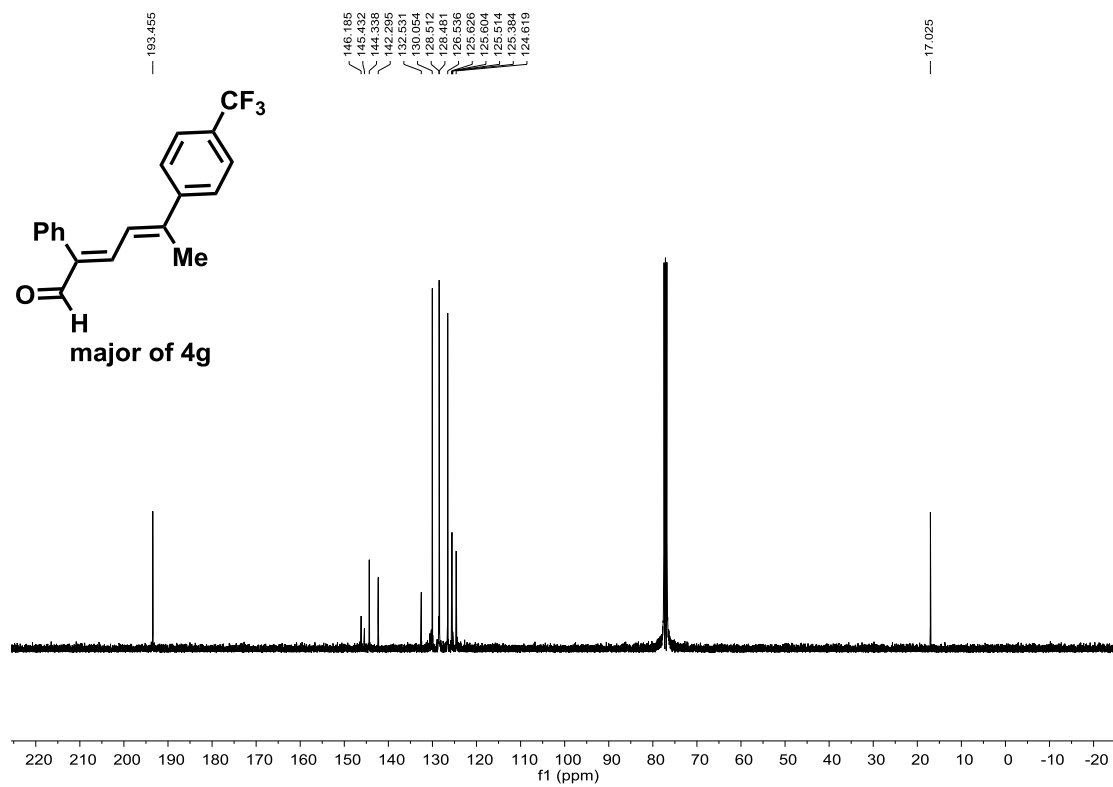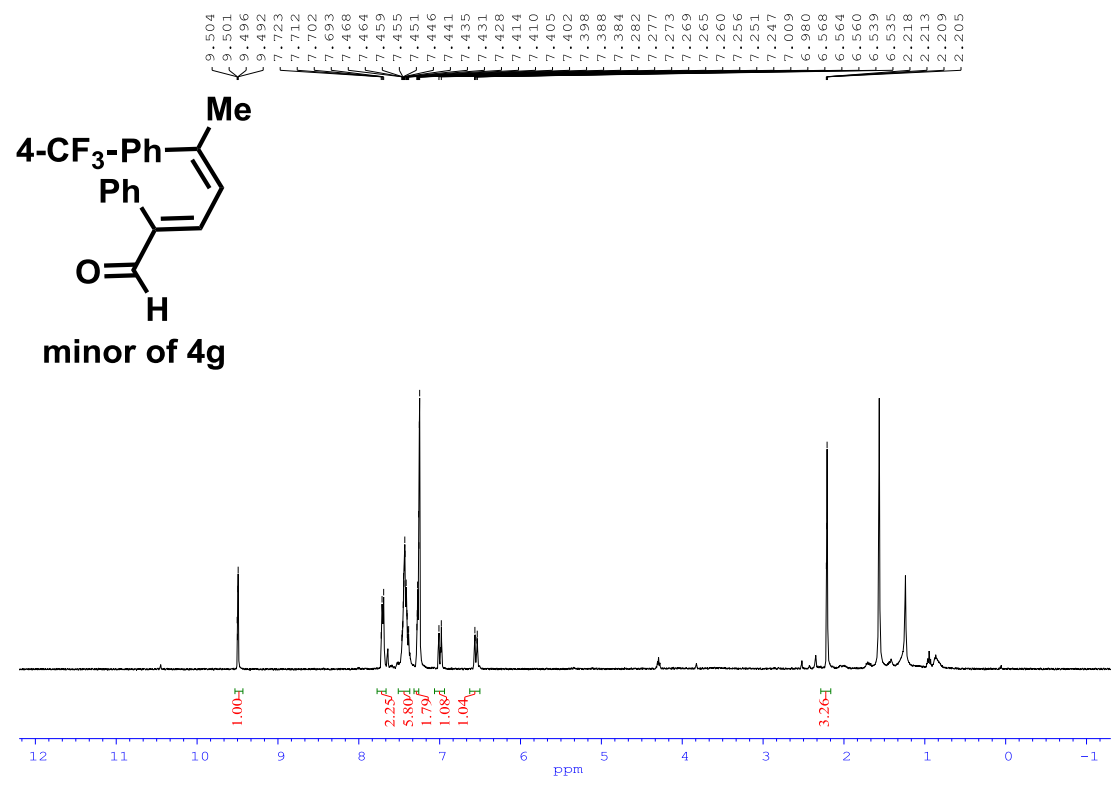

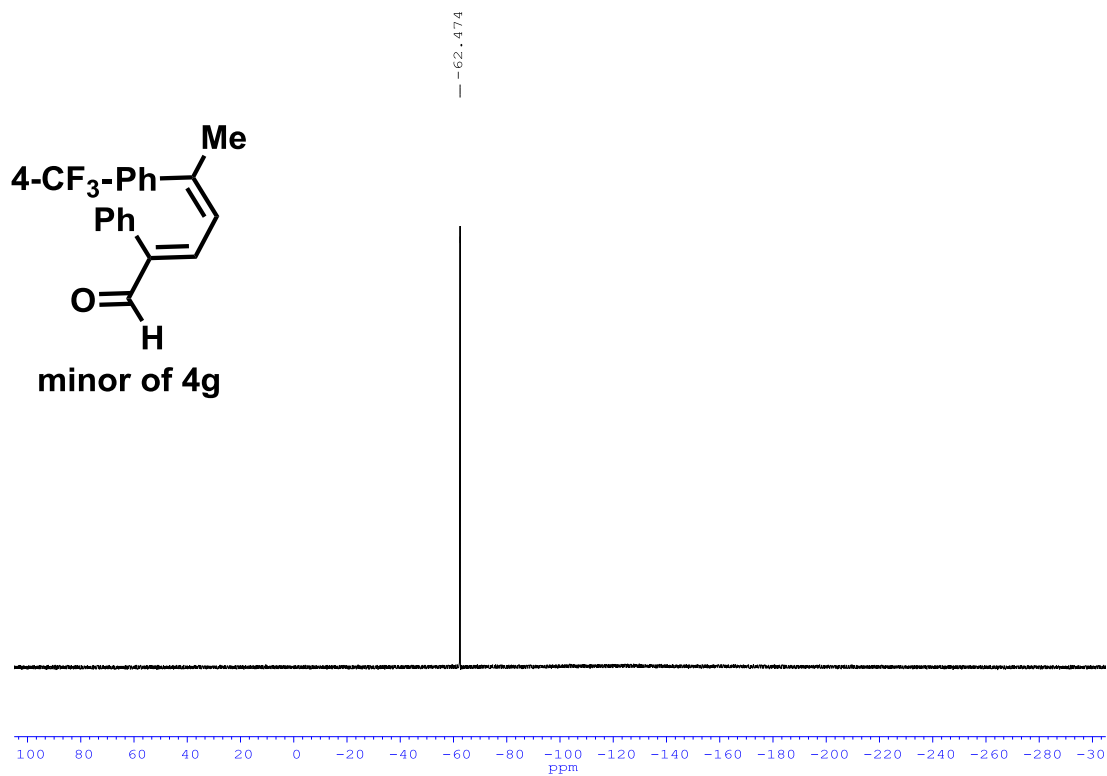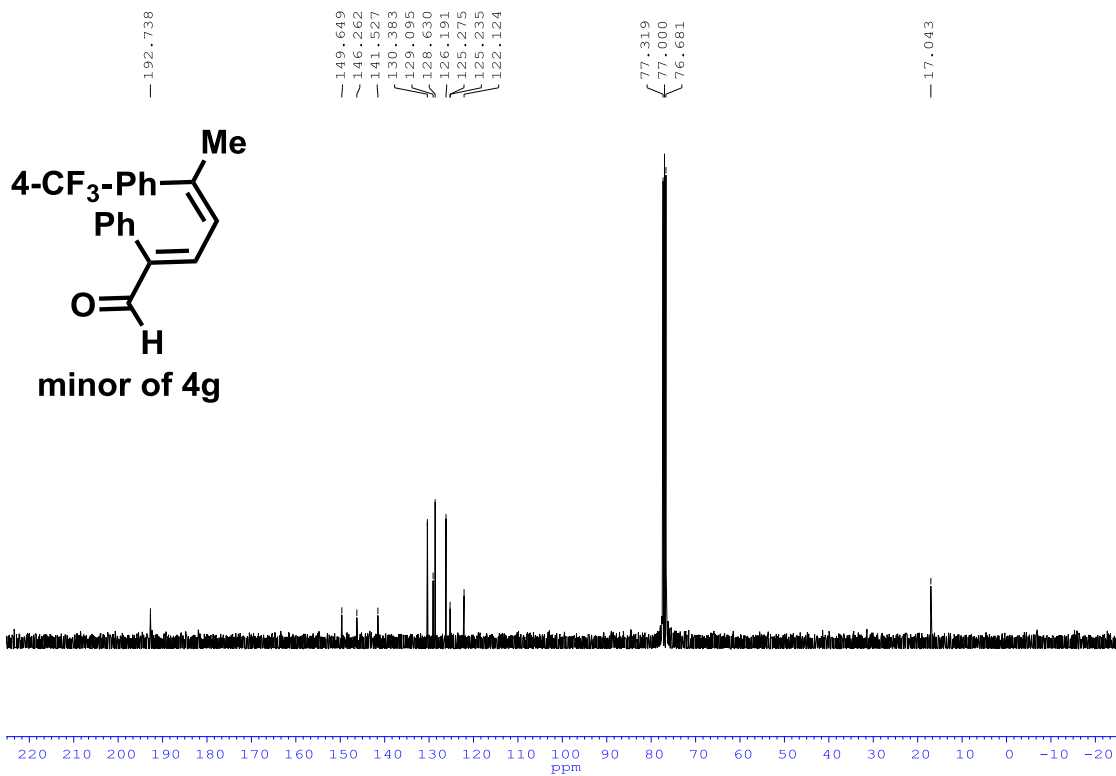

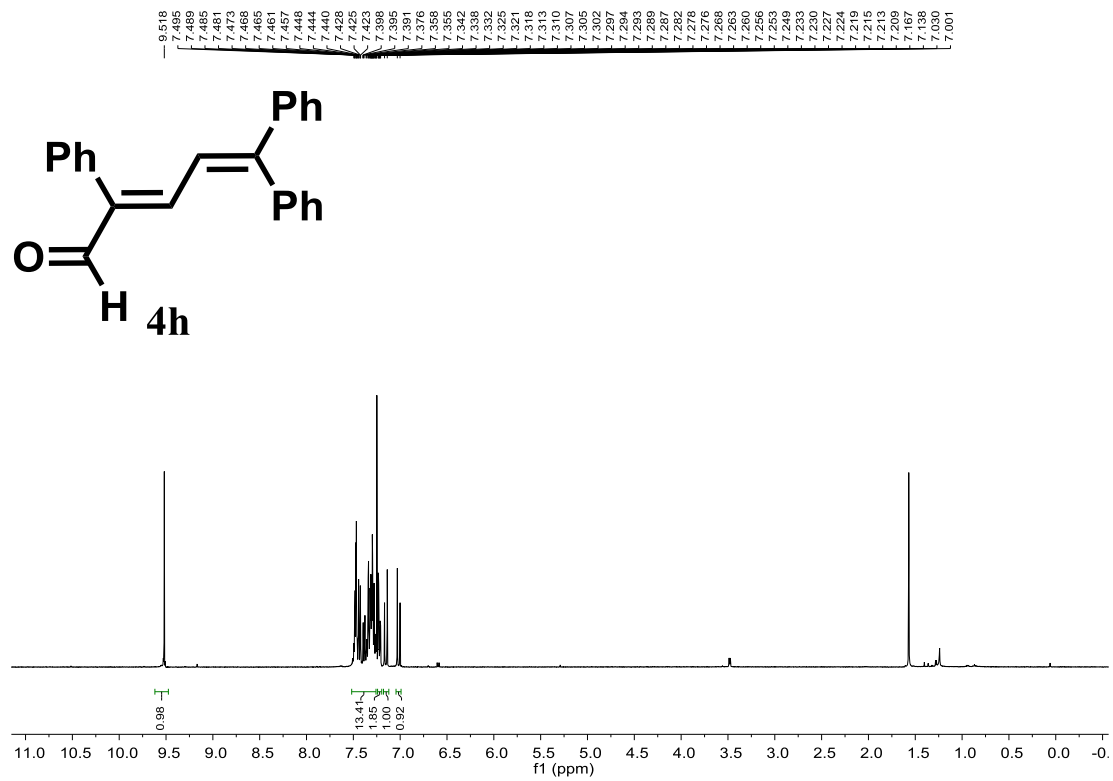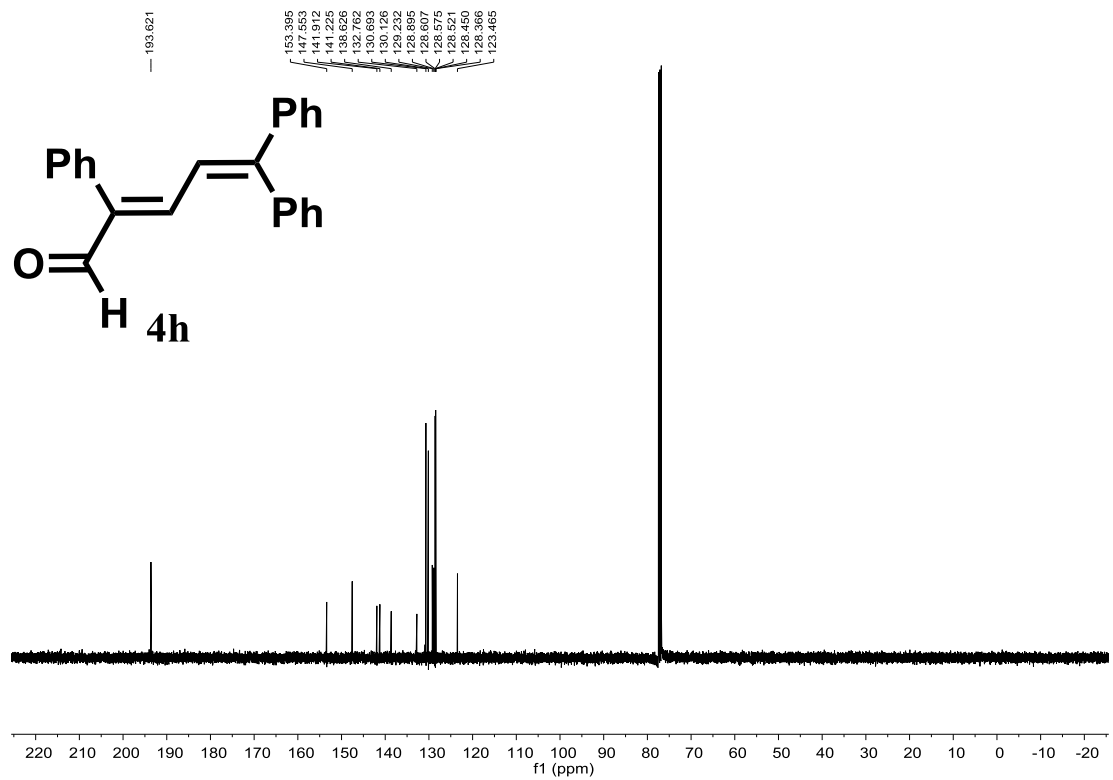



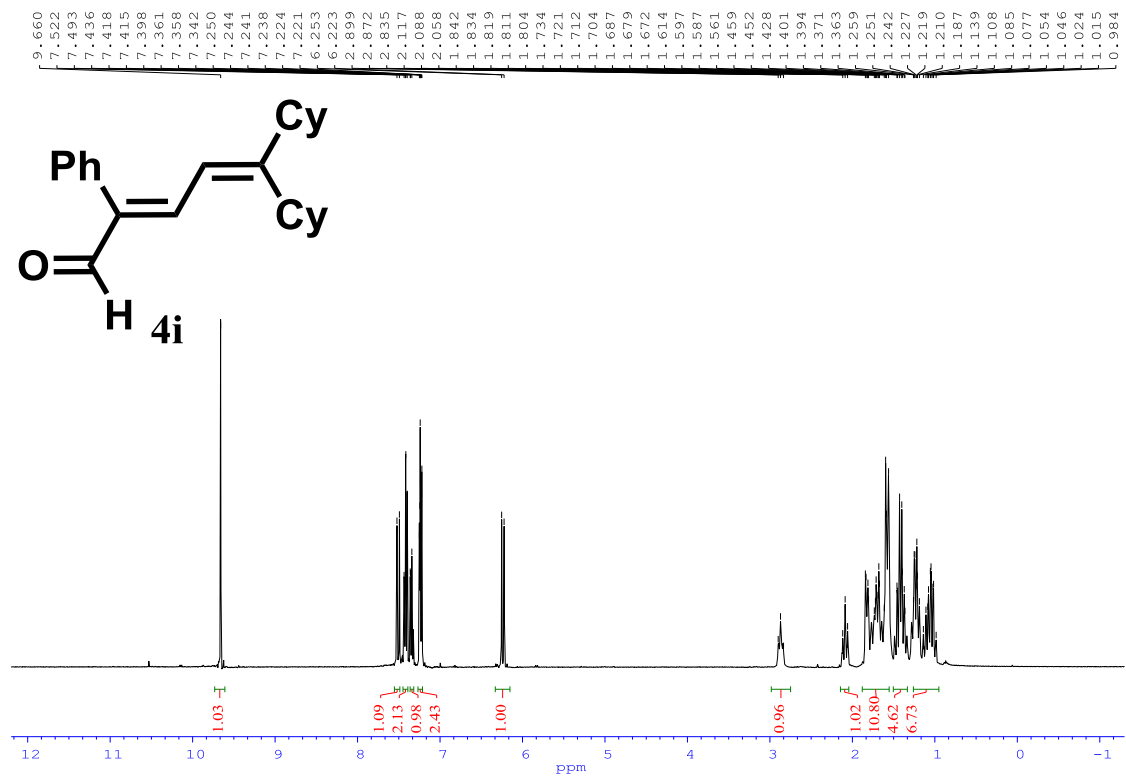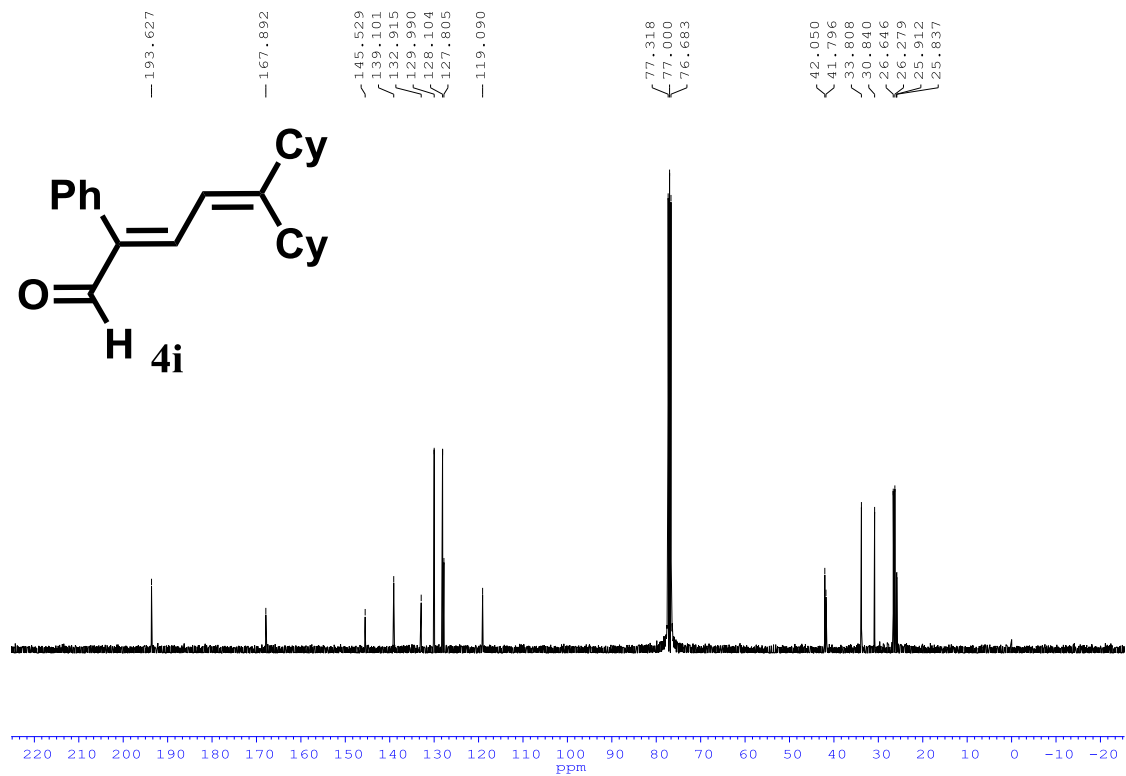

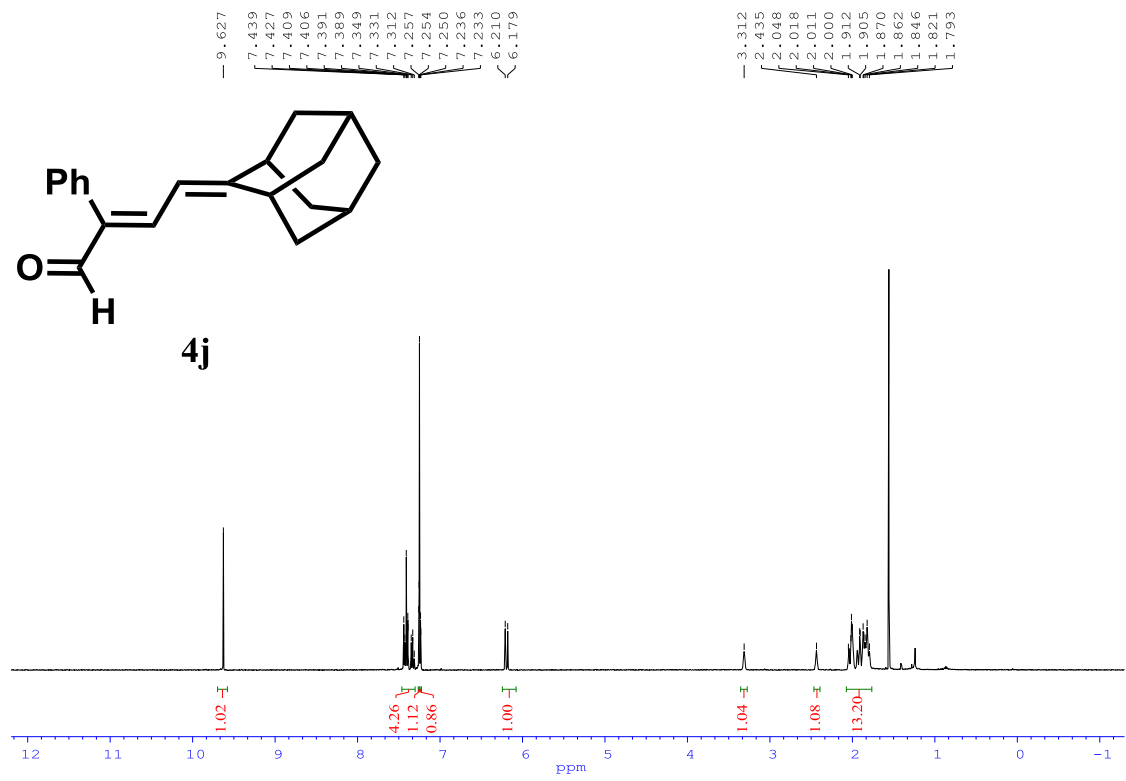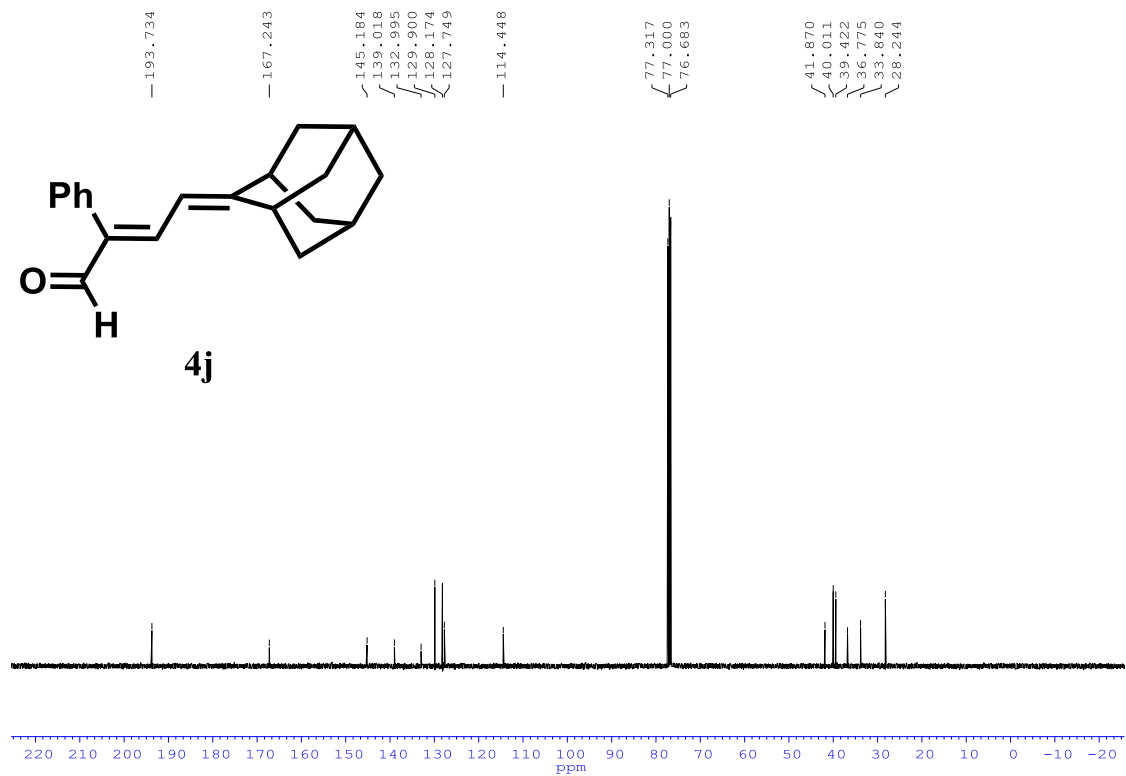

Supplement: d2qo00091a1.pdf [file d2qo00091a1.pdf]
